# Supplementary material for: Catalytic asymmetric deuterosilylation of exocyclic olefins with mannose-derived thiols and deuterium oxide
Source: Royal Society of Chemistry journal article supplement (doi:10.1039/d2qo01979e), 2023-01-01
Supplement: d2qo01979e1.pdf [file d2qo01979e1.pdf]

## SUPPLEMENTARY INFORMATION

### **Catalytic Asymmetric Deuteriosilylation of Exocyclic Olefins with Mannose-Derived Thiols and Deuterium Oxide**

Devenderan Ramanathan<sup>a†</sup>, Qinglong Shi<sup>a†</sup>, Meichen Xu<sup>a</sup>, Rui Chang<sup>a</sup>, Beatriz Peñín<sup>b</sup>,  
Ignacio Funes-Ardoiz<sup>b,\*</sup>, Juntao Ye<sup>a,\*</sup>

<sup>a</sup>Shanghai Key Laboratory for Molecular Engineering of Chiral Drugs, School of Chemistry and Chemical Engineering, Shanghai Jiao Tong University, Shanghai 200240, China.

<sup>b</sup>Department of Chemistry, Centro de Investigación en Síntesis Química (CISQ), Universidad de La Rioja, Madre de Dios 53, 26006 Logroño, Spain.

†These authors contributed equally to this work.

\*Corresponding author. Email: juntaoye@sjtu.edu.cn (J.Y.); ignacio.funesa@unirioja.es (I.F.A.)

## Table of Contents

|                                                                         |    |
|-------------------------------------------------------------------------|----|
| 1. General Information .....                                            | 3  |
| 2. Synthesis of Catalysts and Substrates .....                          | 4  |
| 3. Synthesis and Characterization of Products .....                     | 5  |
| 4. Unsuccessful Substrates .....                                        | 24 |
| 5. Synthetic Applications .....                                         | 24 |
| 6. Mechanistic Studies.....                                             | 27 |
| 6.1 Cyclic Voltammetry Measurements.....                                | 27 |
| 6.2 Stern-Volmer Experiments.....                                       | 28 |
| 6.3 Quantum Yield Measurements.....                                     | 33 |
| 7. X-Ray Crystallographic Data of Compound <b>6</b> and <b>15</b> ..... | 39 |
| 8. Computational Details .....                                          | 42 |
| 9. Supplementary References .....                                       | 51 |
| 10. NMR Spectra and HPLC Spectra .....                                  | 53 |

## 1. General Information

Unless otherwise stated all reactions were set up under nitrogen atmosphere utilizing oven-dried glassware. Solvents were either purchased from Adamas or *J&K* (Sure/Seal bottles) or dried with activated 4 Å molecular sieves and stored in a glovebox under nitrogen atmosphere. Column chromatography was performed using silica gel (200-300 mesh). All other reagents were purchased from various commercial sources and used as received. A blue LED ( $\lambda_{\text{max}} = 441 \text{ nm}$ , 30 W) was used as the light source for all the photo-reactions. Reactions were monitored by thin-layer chromatography on Leyan silica gel plates (60 GF254) which were rendered visible by ultraviolet light and/or spraying with basic  $\text{KMnO}_4$  solution, followed by heating.

$^1\text{H}$  NMR spectra were recorded on a Bruker AVIII 400 (400 MHz), AVIII 500 (500 MHz) spectrometer and are reported in ppm, relative to tetramethylsilane (TMS,  $\delta$  0 ppm) or residual solvent signals ( $\text{CDCl}_3$  referenced at  $\delta$  7.26 ppm). Data are reported as follows: (brs = broad singlet, s = singlet, d = doublet, t = triplet, q = quartet, m = multiplet; coupling constant(s) in Hz; integration).  $^{13}\text{C}$  NMR spectra were recorded on a Bruker AVIII 400 (100 MHz) spectrometer and are reported in ppm, relative to residual solvent signals ( $\text{CDCl}_3$  referenced at  $\delta$  77.0 ppm). High resolution mass spectra (HRMS) were performed at Instrumental Analysis Center of Shanghai Jiao Tong University with electrospray spectrometer Waters Micromass Q-TOF Premier Mass Spectrometer. Enantiomeric ratios (e.r.) and diastereomeric ratios (d.r.) were determined by chiral High Performance Liquid Chromatography (HPLC) analysis. UV detection was monitored at 214 nm or 190 nm at the same time. HPLC samples were dissolved in HPLC grade isopropanol (IPA) and hexane unless otherwise stated. HPLC analysis on chiral stationary phase was performed on a Shimadzu LC-2030 Plus-series instrument. Chiralpak AD-H, OD-H, OJ-H, IC-H, or AS-H columns were used with hexane and IPA being the eluents. Gas chromatography-mass spectrometry (GC-MS) analysis were performed on a Shimadzu GCMS-QP2020NX system. Liquid chromatography-mass spectrometry (LC-MS) analysis were performed on a Shimadzu LCMS 2020 system. Melting points were measured with microscope WRX-4 (Shanghai Yice). Optical rotations were measured on Anton Paar MCP100 automatic polarimeter using a 100 mm path-length cell at 589 nm and reported as follows;  $[\alpha]_{\lambda}^T$  ( $c = \text{g}/100 \text{ mL}$ , solvent).

## 2. Synthesis of Catalysts and Substrates

The photocatalyst 4CzIPN<sup>1</sup> and 4DPAIPN,<sup>2</sup> **S1**,<sup>3</sup> **S2**,<sup>4</sup> **S3-S6**,<sup>3</sup> olefins,<sup>5</sup> and silanes<sup>6</sup> were either commercially available or synthesized according to the reported procedures.

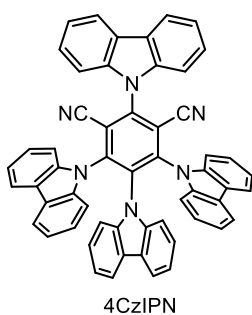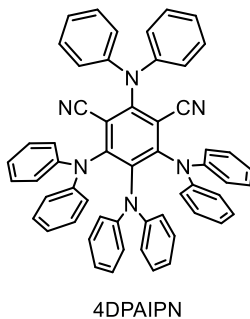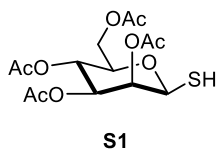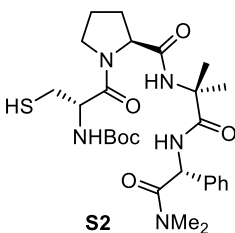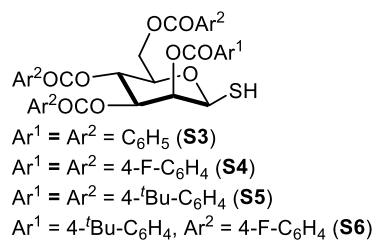

### 3. Synthesis and Characterization of Products

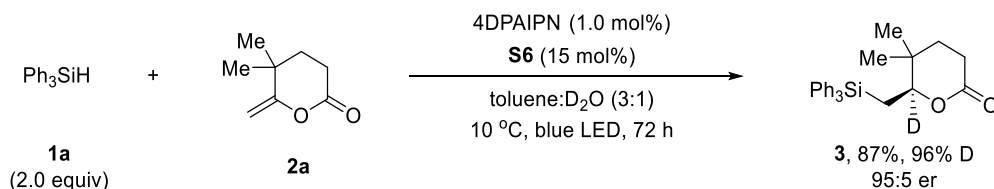

**Typical procedure:** To an oven-dried 16 x 60 mm vial containing a dry Teflon stir bar were charged with photocatalyst 4DPAIPN (1.7 mg, 0.002 mmol), thiol catalyst **S6** (21.5 mg, 0.03 mmol) and triphenylsilane **1a** (104.4 mg, 0.4 mmol). After sequential addition of dry toluene (1.5 mL), D<sub>2</sub>O (0.5 mL), and olefin **2a** (28.2 mg, 0.2 mmol), the reaction mixture was flushed with nitrogen gas for two minutes and then the vial was sealed with a cap and parafilm. The vial was placed in a cooling station and a 30 W blue LED ( $\lambda_{\text{max}} = 441 \text{ nm}$ ) was then placed at the top of the cooling station (**Figure S1**), which is connected to a chiller to maintain the temperature of the cooling water at 10 °C. The reaction mixture was stirred at 10 °C under irradiation for 72 h. When the reaction is complete as monitored by TLC and GC, CH<sub>2</sub>Cl<sub>2</sub> (10 mL) and H<sub>2</sub>O (5 mL) were added, the organic layer was separated and the aqueous layer was extracted with CH<sub>2</sub>Cl<sub>2</sub> (10 mL × 3). The combined organic layer was washed with brine and dried over anhydrous Na<sub>2</sub>SO<sub>4</sub>. After filtration and evaporation, the residue was purified by chromatography on silica gel (eluent: petroleum ether/dichloromethane/ether = 14/10/1) to afford **3** (70.0 mg, 87%, 96% D) as a colorless solid: 95:5 er (HPLC conditions: Chiralcel AD-H column, hexane/*i*-PrOH = 98.5/1.5, 1.0 mL/min,  $\lambda = 214 \text{ nm}$ ,  $t_{\text{R}}$  (minor) = 13.0 min,  $t_{\text{R}}$  (major) = 16.4 min);  $[\alpha]_{\text{D}}^{25} = -68.8$  ( $c = 0.50$ , CHCl<sub>3</sub>); **m.p.** 85-87 °C; **<sup>1</sup>H NMR** (400 MHz, CDCl<sub>3</sub>)  $\delta = 7.68$ -7.54 (m, 6 H), 7.46-7.31 (m, 9 H), 4.11 (dd,  $J_1 = 11.6 \text{ Hz}$ ,  $J_2 = 2.4 \text{ Hz}$ , 0.04 H), 2.51-2.31 (m, 2 H), 1.78 (d,  $J = 15.2 \text{ Hz}$ , 1 H), 1.65-1.52 (m, 3 H), 1.00 (s, 3 H), 0.92 (s, 3 H); **<sup>13</sup>C NMR** (100 MHz, CDCl<sub>3</sub>)  $\delta = 170.9$ , 135.9, 134.5, 129.5, 127.8, 84.2 (t,  $J_{\text{C-D}} = 21.9 \text{ Hz}$ ), 34.0, 33.0, 27.4, 26.5, 19.3, 14.9; **HRMS** (ESI) calcd for C<sub>26</sub>H<sub>27</sub>DNaO<sub>2</sub>Si [M+Na<sup>+</sup>]: 424.1814, found: 424.1811.

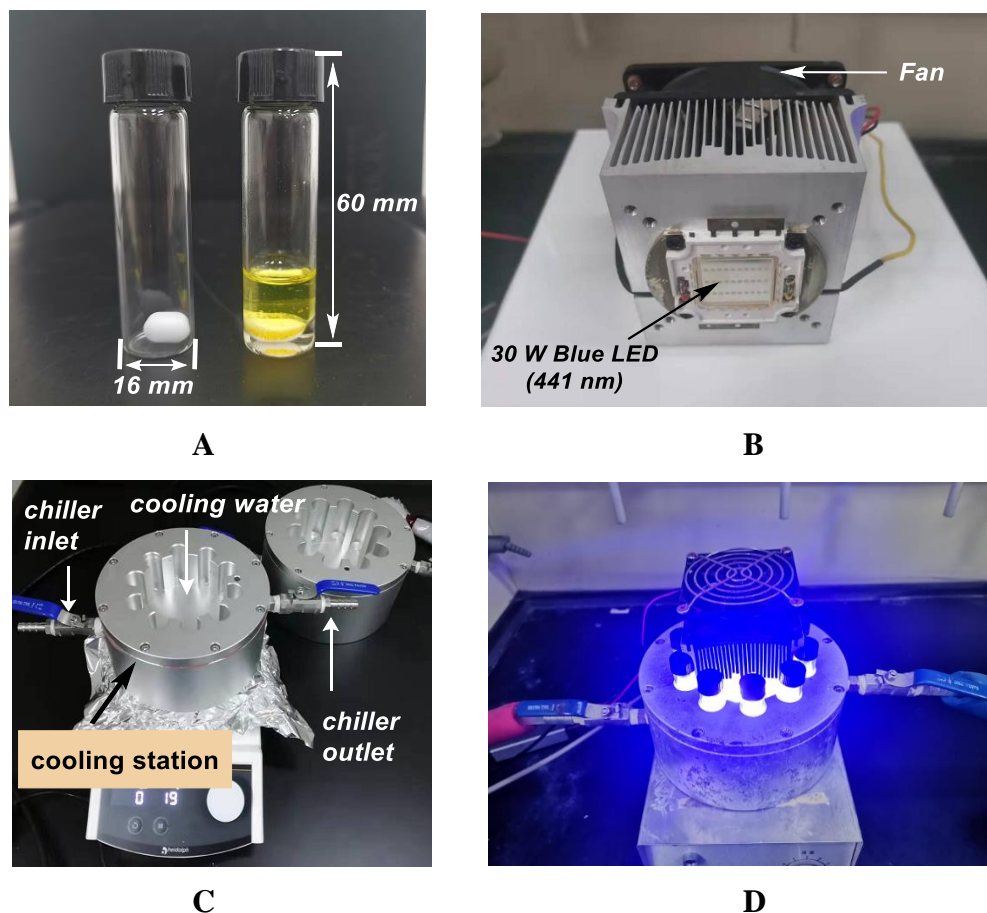

**Figure S1. Reaction setup.** (A) 8-mL vial used for the reaction. (B) 30 W blue LED ( $\lambda = 441$  nm) used for the reaction. (C) A custom-made cooling station, connected to a chiller to maintain the reaction temperature at  $10\text{ }^{\circ}\text{C}$ . (D) Reaction setup (covered by a cardboard box when the light is on).

The following compounds **4-35** were prepared according to the above **Typical Procedure** unless otherwise stated. All the racemic samples for HPLC measurement were also prepared according to this procedure but using  $\text{Ph}_3\text{SiSH}$  or  $\text{CySH}$  instead of a chiral thiol catalyst.

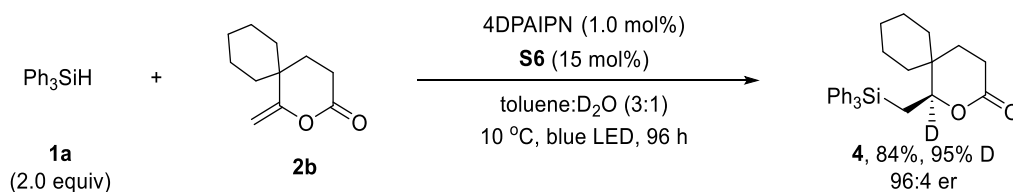

The reaction of 4DPAIPN (2.0 mg, 0.002 mmol), **1a** (104.4 mg, 0.4 mmol), **2b** (36.3 mg, 0.2 mmol), **S6** (21.9 mg, 0.03 mmol), toluene (1.5 mL) and  $\text{D}_2\text{O}$  (0.5 mL) afforded **4** (74.8 mg,



= 8.3 min,  $t_R$  (minor) = 9.0 min);  $[\alpha]_D^{25} = -61.0$  ( $c = 0.50$ ,  $\text{CHCl}_3$ ); **m.p.** 115-118 °C;  $^1\text{H NMR}$  (500 MHz,  $\text{CDCl}_3$ )  $\delta = 7.71$ -7.52 (m, 6 H), 7.49-7.32 (m, 9 H), 4.32 (dd,  $J_1 = 11.5$  Hz,  $J_2 = 2.5$  Hz, 0.06 H), 2.54-2.38 (m, 2 H), 1.90-1.78 (m, 2 H), 1.72-1.48 (m, 8 H), 1.42-1.32 (m, 2 H);  $^{13}\text{C NMR}$  (100 MHz,  $\text{CDCl}_3$ )  $\delta = 170.7$ , 135.9, 134.4, 129.6, 127.9, 45.1, 36.1, 32.4, 30.8, 27.5, 25.4, 25.0, 16.5; **HRMS** (ESI) calcd for  $\text{C}_{28}\text{H}_{29}\text{DNaO}_2\text{Si}$  [ $\text{M}+\text{Na}^+$ ]: 450.1970, found: 450.1971.

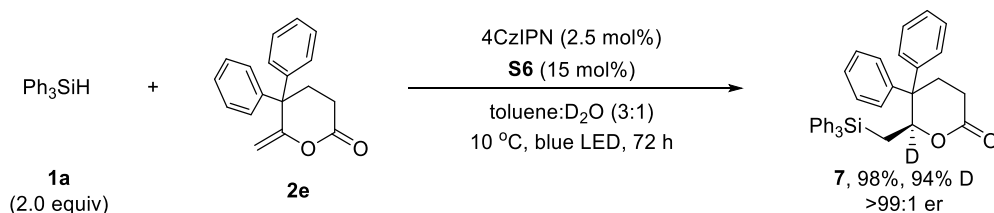

The reaction of 4CzIPN (4.2 mg, 0.005 mmol), **1a** (104.9 mg, 0.4 mmol), **2e** (53.9 mg, 0.2 mmol), **S6** (22.2 mg, 0.03 mmol), toluene (1.5 mL) and  $\text{D}_2\text{O}$  (0.5 mL) afforded **7** (105.2 mg, 98%, 94% D) (eluent: petroleum ether/DCM/ether = 14/10/1) as a colorless foamy solid: >99:1 er (HPLC conditions: Chiralcel OD-H column, hexane/*i*-PrOH = 90/10, 1.0 mL/min,  $\lambda = 214$  nm,  $t_R$  (major) = 6.7 min,  $t_R$  (minor) = 8.7 min);  $[\alpha]_D^{25} = -192.0$  ( $c = 0.50$ ,  $\text{CHCl}_3$ ); **m.p.** 72-74 °C;  $^1\text{H NMR}$  (400 MHz,  $\text{CDCl}_3$ )  $\delta = 7.51$ -7.10 (m, 23 H), 7.00 (d,  $J = 7.6$  Hz, 2 H), 5.38 (d,  $J = 10.8$  Hz, 0.06 H), 2.97-2.84 (m, 1 H), 2.56-2.40 (m, 2 H), 2.15-2.00 (m, 1 H), 1.75 (d,  $J = 15.2$  Hz, 1 H), 1.25 (d,  $J = 15.2$  Hz, 1 H);  $^{13}\text{C NMR}$  (100 MHz,  $\text{CDCl}_3$ )  $\delta = 169.0$ , 144.4, 143.8, 135.8, 134.0, 129.6, 128.7, 127.9, 127.6, 127.3, 126.8, 126.6, 49.1, 27.5, 26.5, 17.7; **HRMS** (ESI) calcd for  $\text{C}_{36}\text{H}_{31}\text{DNaO}_2\text{Si}$  [ $\text{M}+\text{Na}^+$ ]: 548.2127, found: 548.2125.

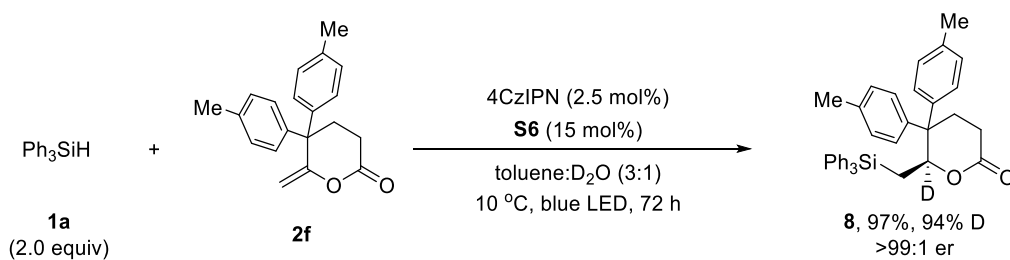

The reaction of 4CzIPN (4.1 mg, 0.005 mmol), **1a** (105.3 mg, 0.4 mmol), **2f** (58.7 mg, 0.2 mmol), **S6** (22.2 mg, 0.03 mmol), toluene (1.5 mL) and  $\text{D}_2\text{O}$  (0.5 mL) afforded **8** (108.2 mg, 97%, 94% D) (eluent: petroleum ether/DCM/ether = 14/10/1) as a colorless foamy solid: >99:1 er (HPLC conditions: Chiralcel OD-H column, hexane/*i*-PrOH = 90/10, 1.0 mL/min,  $\lambda = 214$  nm,  $t_R$  (major) = 5.4 min,  $t_R$  (minor) = 7.3 min);  $[\alpha]_D^{25} = -181.0$  ( $c = 0.50$ ,  $\text{CHCl}_3$ ); **m.p.** 82-84 °C;  $^1\text{H NMR}$





er (HPLC conditions: Chiralcel OD-H column, hexane/*i*-PrOH = 95/5, 1.0 mL/min,  $\lambda = 214$  nm,  $t_R$  (major) = 10.0 min,  $t_R$  (minor) = 11.2 min);  $[\alpha]_D^{25} = -149.8$  ( $c = 0.51$ ,  $\text{CHCl}_3$ ); **m.p.** 97-102 °C;  **$^1\text{H NMR}$**  (400 MHz,  $\text{CDCl}_3$ )  $\delta = 7.50$ -7.28 (m, 15 H), 7.17-7.06 (m, 2 H), 6.99-6.85 (m, 6 H), 5.28 (d,  $J = 11.2$  Hz, 0.08 H), 2.97-2.77 (m, 1 H), 2.56-2.34 (m, 2 H), 2.20-1.96 (m, 1 H), 1.74 (d,  $J = 15.2$  Hz, 1 H), 1.22 (d,  $J = 15.2$  Hz, 1 H);  **$^{13}\text{C NMR}$**  (100 MHz,  $\text{CDCl}_3$ )  $\delta = 168.5$ , 162.6 (d,  $J_{\text{C-F}} = 6.6$  Hz), 160.1 (d,  $J_{\text{C-F}} = 6.4$  Hz), 140.0 (d,  $J_{\text{C-F}} = 3.3$  Hz), 139.3 (d,  $J_{\text{C-F}} = 3.2$  Hz), 135.7, 133.7, 129.7, 129.3 (d,  $J_{\text{C-F}} = 7.8$  Hz), 128.9 (d,  $J_{\text{C-F}} = 7.8$  Hz), 127.9, 115.8 (d,  $J_{\text{C-F}} = 1.6$  Hz), 115.5 (d,  $J_{\text{C-F}} = 1.5$  Hz), 48.3, 27.3, 26.9, 17.8;  **$^{19}\text{F NMR}$**  (376 MHz,  $\text{CDCl}_3$ )  $\delta = -115.0$ , -115.3; **HRMS** (ESI) calcd for  $\text{C}_{36}\text{H}_{29}\text{DF}_2\text{NaO}_2\text{Si}$  [ $\text{M}+\text{Na}^+$ ]: 584.1938, found: 584.1935.

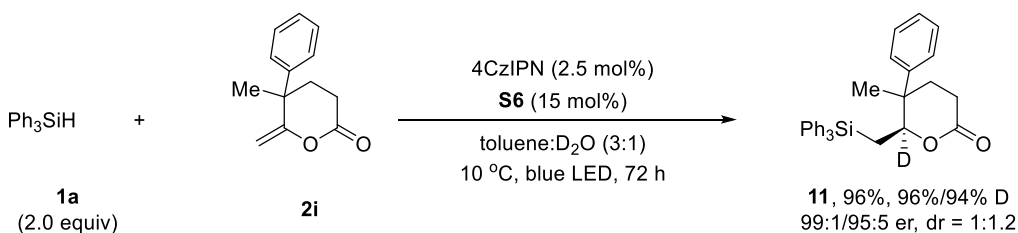

The reaction of 4CzIPN (4.0 mg, 0.005 mmol), **1a** (104.4 mg, 0.4 mmol), **2i** (40.7 mg, 0.2 mmol), **S6** (21.9 mg, 0.03 mmol), toluene (1.5 mL) and  $\text{D}_2\text{O}$  (0.5 mL) afforded **11** (90.9 mg, 96%, 96%/94% D) (eluent: petroleum ether/DCM/ether = 14/10/1) as a colorless foamy solid: 99:1/95:5 er, dr = 1:1.2 (HPLC conditions: Chiralcel OD-H column, hexane/*i*-PrOH = 99.8/0.2, 1.0 mL/min,  $\lambda = 214$  nm,  $t_1 = 39.0$  min,  $t_2 = 41.5$  min,  $t_3 = 45.5$  min,  $t_4 = 50.3$  min);  $[\alpha]_D^{25} = -38.1$  ( $c = 0.22$ ,  $\text{CHCl}_3$ ); **m.p.** 56-58 °C;  **$^1\text{H NMR}$**  (400 MHz,  $\text{CDCl}_3$ )  $\delta = 7.75$ -7.00 (m, 35.0 H), 4.68 (dd,  $J_1 = 11.4$  Hz,  $J_2 = 1.0$  Hz, 0.04 H), 4.47 (dd,  $J_1 = 11.4$  Hz,  $J_2 = 2.2$  Hz, 0.06 H), 2.66-2.38 (m, 3.5 H), 2.37-2.12 (m, 1.8 H), 2.02-1.87 (m, 1 H), 1.83-1.72 (m, 0.8 H), 1.69 (d,  $J = 15.2$  Hz, 1 H), 1.58 (d,  $J = 15.2$  Hz, 1 H), 1.44 (s, 2 H), 1.39-1.29 (m, 4 H), 1.23-1.15 (m, 0.8 H);  **$^{13}\text{C NMR}$**  (100 MHz,  $\text{CDCl}_3$ )  $\delta = 171.3$ , 171.0, 145.1, 144.0, 135.78, 135.75, 134.19, 134.17, 129.51, 129.46, 128.7, 128.5, 127.80, 127.75, 126.8, 126.7, 126.6, 125.9, 84.3-82.6 (m), 40.9, 40.8, 35.0, 31.8, 28.0, 27.5, 25.3, 17.3, 16.2, 14.5; **HRMS** (ESI) calcd for  $\text{C}_{31}\text{H}_{29}\text{DNaO}_2\text{Si}$  [ $\text{M}+\text{Na}^+$ ]: 486.1970, found: 486.1962.

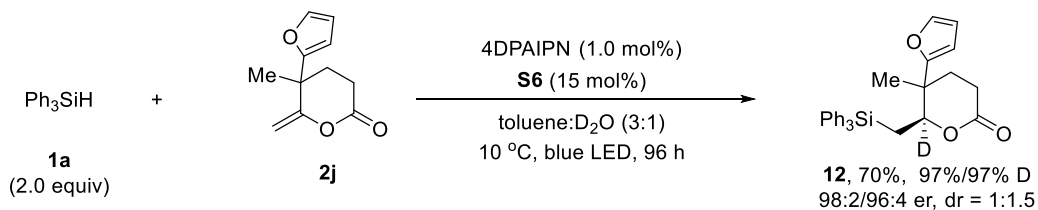

The reaction of 4DPAIPN (2.0 mg, 0.002 mmol), **1a** (104.7 mg, 0.4 mmol), **2j** (38.5 mg, 0.2 mmol), **S6** (21.1 mg, 0.03 mmol), toluene (1.5 mL) and D<sub>2</sub>O (0.5 mL) for 96 hours afforded **12** (63.8 mg, 70%, 97%/97% D) (eluent: petroleum ether/DCM/ether = 14/10/1) as a colorless oil: 98:2/96:4 er, dr = 1:1.5 (HPLC conditions: Chiralcel AD-H column, hexane/*i*-PrOH = 99.2/0.8, 1 mL/min,  $\lambda = 214$  nm,  $t_1 = 24.3$  min,  $t_2 = 27.3$  min,  $t_3 = 34.4$  min,  $t_4 = 43.0$  min);  $[\alpha]_{\text{D}}^{25} = -50.0$  ( $c = 0.24$ , CHCl<sub>3</sub>); **<sup>1</sup>H NMR** (400 MHz, CDCl<sub>3</sub>)  $\delta = 8.17$ -6.97 (m, 35.0 H), 6.40-6.24 (m, 1.8 H), 6.16 (d,  $J = 3.2$  Hz, 1 H), 6.12 (d,  $J = 3.2$  Hz, 0.8 H), 4.69 (dd,  $J_1 = 11.4$  Hz,  $J_2 = 1.4$  Hz, 0.03 H), 4.31 (dd,  $J_1 = 11.4$  Hz,  $J_2 = 2.6$  Hz, 0.03 H), 2.70-2.24 (m, 5 H), 2.21-2.11 (m, 1 H), 1.85-1.64 (m, 4 H), 1.53 (d,  $J = 15.2$  Hz, 1 H), 1.43-1.20 (m, 7 H); **<sup>13</sup>C NMR** (100 MHz, CDCl<sub>3</sub>)  $\delta = 170.9$ , 170.7, 158.0, 156.4, 142.0, 141.8, 135.80, 135.78, 134.4, 134.2, 129.47, 129.46, 127.78, 127.77, 110.2, 109.9, 107.1, 106.1, 39.0, 38.9, 31.7, 31.6, 27.6, 27.2, 23.3, 16.5, 15.8, 14.8; **HRMS** (ESI) calcd for C<sub>29</sub>H<sub>27</sub>DNaO<sub>3</sub>Si [M+Na<sup>+</sup>]: 476.1763, found: 476.1765.

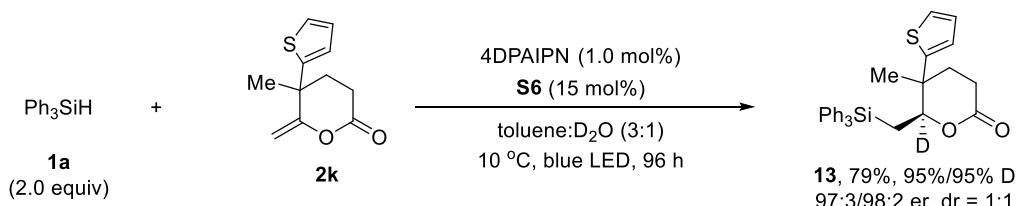

The reaction of 4DPAIPN (1.6 mg, 0.002 mmol), **1a** (104.5 mg, 0.4 mmol), **2k** (41.6 mg, 0.2 mmol), **S6** (21.8 mg, 0.03 mmol), toluene (1.5 mL) and D<sub>2</sub>O (0.5 mL) for 96 hours afforded **13** (74.4 mg, 79%, 95%/95% D) (eluent: petroleum ether/DCM/ether = 14/10/1) as a colorless oil: 97:3/98:2 er, dr = 1:1 (HPLC conditions: Chiralcel AD-H column, hexane/*i*-PrOH = 99.5/0.5, 0.5 mL/min,  $\lambda = 190$  nm,  $t_1 = 41.7$  min,  $t_2 = 43.9$  min,  $t_3 = 56.2$  min,  $t_4 = 61.7$  min);  $[\alpha]_{\text{D}}^{25} = -47.0$  ( $c = 0.22$ , CHCl<sub>3</sub>); **<sup>1</sup>H NMR** (400 MHz, CDCl<sub>3</sub>)  $\delta = 7.60$ -7.26 (m, 30 H), 7.24-7.17 (m, 2 H), 7.00-6.92 (m, 2 H), 6.92-6.87 (m, 1 H), 6.84-6.79 (m, 1 H), 4.55 (dd,  $J_1 = 11.6$  Hz,  $J_2 = 1.2$  Hz, 0.05 H), 4.34 (dd,  $J_1 = 11.4$  Hz,  $J_2 = 2.4$  Hz, 0.05 H), 2.57-2.35 (m, 4 H), 2.26-2.10 (m, 2 H), 2.01-1.85 (m, 2 H), 1.80 (d,  $J = 15.2$  Hz, 1 H), 1.73 (d,  $J = 15.2$  Hz, 1 H), 1.60-1.34 (m, 8 H); **<sup>13</sup>C NMR**

**NMR** (101 MHz, CDCl<sub>3</sub>)  $\delta$  = 170.7, 170.4, 150.3, 147.2, 135.83, 135.81, 134.3, 134.2, 129.52, 129.49, 127.83, 127.78, 126.9, 126.8, 124.8, 124.0, 123.9, 123.7, 40.4, 40.2, 36.2, 34.4, 27.6, 26.8, 18.3, 15.7, 14.7; **HRMS** (ESI) calcd for C<sub>29</sub>H<sub>27</sub>DNaO<sub>2</sub>SSi [M+Na<sup>+</sup>]: 492.1534, found: 492.1532.

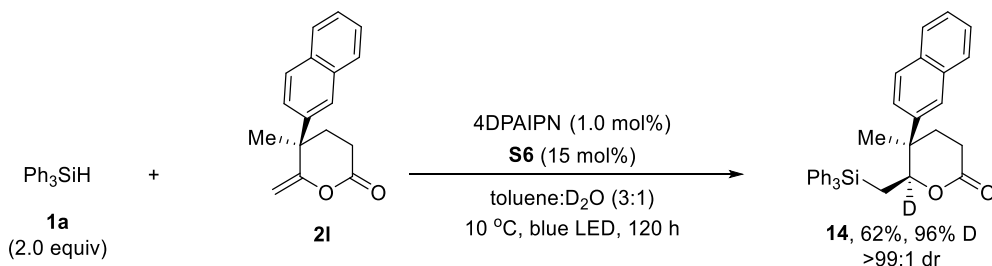

The reaction of 4DPAIPN (1.8 mg, 0.002 mmol), **1a** (104.6 mg, 0.4 mmol), (*R*)-**2I** (obtained via preparative HPLC, >99:1 er, 50.7 mg, 0.2 mmol), **S6** (21.6 mg, 0.03 mmol), toluene (1.5 mL) and D<sub>2</sub>O (0.5 mL) for 120 hours afforded **14** (63.6 mg, 62%, 96% D) (eluent: petroleum ether/ethyl acetate = 5/1) as a colorless foamy solid: >99:1 dr (HPLC conditions: Chiralcel AD-H column, hexane/*i*-PrOH = 99.3/0.7, 0.5 mL/min,  $\lambda$  = 214 nm,  $t_1$  (major) = 19.5 min,  $t_2$  (minor) = 27.8 min);  $[\alpha]_D^{25}$  = -62.5 ( $c$  = 0.11, CHCl<sub>3</sub>); **m.p.** 71-73 °C; **<sup>1</sup>H NMR** (400 MHz, CDCl<sub>3</sub>)  $\delta$  = 7.99-7.64 (m, 4 H), 7.61-7.06 (m, 18 H), 4.57 (dd,  $J_1$  = 11.4 Hz,  $J_2$  = 2.2 Hz, 0.04 H), 2.66-2.27 (m, 3 H), 2.12-1.99 (m, 1 H), 1.65 (d,  $J$  = 15.2 Hz, 1 H), 1.51-1.30 (m, 4 H); **<sup>13</sup>C NMR** (101 MHz, CDCl<sub>3</sub>)  $\delta$  = 171.4, 141.6, 135.8, 134.2, 133.1, 132.1, 129.6, 128.4, 128.1, 127.9, 127.4, 126.2, 126.0, 125.3, 125.0, 41.1, 32.0, 27.6, 25.3, 16.4; **HRMS** (ESI) calcd for C<sub>35</sub>H<sub>31</sub>DNaO<sub>2</sub>Si [M+Na<sup>+</sup>]: 536.2127, found: 536.2120.

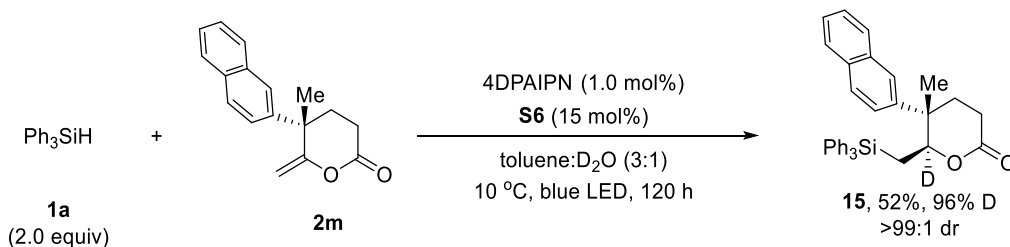

The reaction of 4DPAIPN (1.6 mg, 0.002 mmol), **1a** (104.7 mg, 0.4 mmol), (*S*)-**2m** (obtained via preparative HPLC, >99:1 er, 50.6 mg, 0.2 mmol), **S6** (21.8 mg, 0.03 mmol), toluene (1.5 mL) and D<sub>2</sub>O (0.5 mL) for 120 hours afforded **15** (53.3 mg, 52%, 96% D) (eluent: petroleum ether/ethyl acetate = 5/1) as a colorless foamy solid: >99:1 dr (HPLC conditions:



= 7.9 min,  $t_R$  (major) = 13.2 min);  $[\alpha]_D^{25} = -30.0$  ( $c = 0.22$ ,  $\text{CHCl}_3$ ); **m.p.** 142-144 °C;  $^1\text{H NMR}$  (400 MHz,  $\text{CDCl}_3$ )  $\delta = 7.61\text{-}7.50$  (m, 6 H), 7.48-7.35 (m, 9 H), 4.40 (dd,  $J_1 = 11.4$  Hz,  $J_2 = 3.0$  Hz, 0.05 H), 1.90 (d,  $J = 15.2$  Hz, 1 H), 1.49 (d,  $J = 14.8$  Hz, 1 H), 1.40 (s, 3 H), 1.33 (s, 3 H);  $^{13}\text{C NMR}$  (100 MHz,  $\text{CDCl}_3$ )  $\delta = 153.7$ , 135.7, 133.2, 130.0, 128.1, 84.9, 82.8 (t,  $J_{\text{C-D}} = 22.6$  Hz), 25.1, 21.4, 14.1; **HRMS** (ESI) calcd for  $\text{C}_{24}\text{H}_{23}\text{DNaO}_3\text{Si}$   $[\text{M}+\text{Na}^+]$ : 412.1450, found: 412.1444.

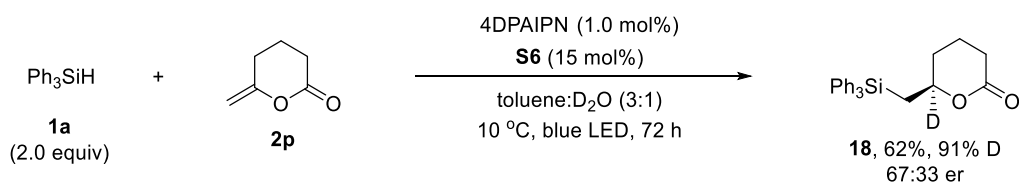

The reaction of 4DPAIPN (1.8 mg, 0.002 mmol), **1a** (106.5 mg, 0.4 mmol), **2p** (22.3 mg, 0.2 mmol), **S6** (22.7 mg, 0.03 mmol), toluene (1.5 mL) and  $\text{D}_2\text{O}$  (0.5 mL) afforded **18** (46.3 mg, 62%, 91% D) (eluent: petroleum ether/ethyl acetate = 5/1) as a white solid: 67:33 er (HPLC conditions: Chiralcel AD-H column, hexane/*i*-PrOH = 96/4, 1.0 mL/min,  $\lambda = 214$  nm,  $t_R$  (minor) = 10.2 min,  $t_R$  (major) = 12.9 min);  $[\alpha]_D^{25} = -6.88$  ( $c = 0.16$ ,  $\text{CHCl}_3$ ); **m.p.** 81-83 °C;  $^1\text{H NMR}$  (400 MHz,  $\text{CDCl}_3$ )  $\delta = 7.60\text{-}7.50$  (m, 6 H), 7.45-7.31 (m, 9 H), 4.53-4.40 (m, 0.10 H), 2.53-2.22 (m, 2 H), 2.11 (d,  $J = 14.8$  Hz, 1 H), 1.87-1.52 (m, 4 H), 1.48-1.35 (m, 1 H);  $^{13}\text{C NMR}$  (100 MHz,  $\text{CDCl}_3$ )  $\delta = 171.6$ , 135.5, 134.0, 129.8, 128.0, 30.3, 29.1, 21.7, 18.5; **HRMS** (ESI) calcd for  $\text{C}_{24}\text{H}_{23}\text{DNaO}_2\text{Si}$   $[\text{M}+\text{Na}^+]$ : 396.1501, found: 396.1498.

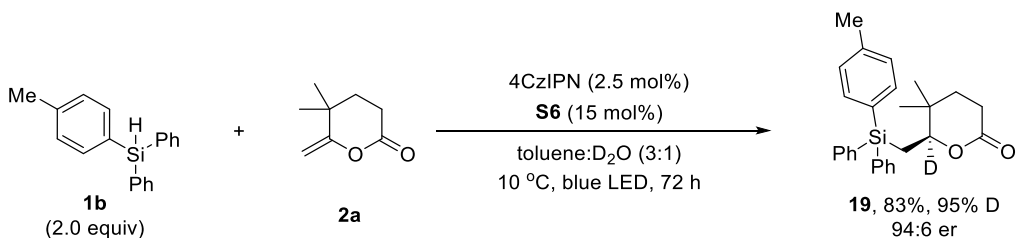

The reaction of 4CzIPN (4.0 mg, 0.005 mmol), **1b** (110.9 mg, 0.4 mmol), **2a** (28.3 mg, 0.2 mmol), **S6** (21.1 mg, 0.03 mmol), toluene (1.5 mL) and  $\text{D}_2\text{O}$  (0.5 mL) afforded **19** (69.0 mg, 83%, 95% D) (eluent: petroleum ether/DCM/ether = 14/10/1) as a colorless solid: 94:6 er (HPLC conditions: Chiralcel AD-H column, hexane/*i*-PrOH = 98/2, 1.0 mL/min,  $\lambda = 214$  nm,  $t_R$  (minor) = 11.4 min,  $t_R$  (major) = 14.6 min);  $[\alpha]_D^{25} = -66.3$  ( $c = 0.51$ ,  $\text{CHCl}_3$ ); **m.p.** 83-84 °C;  $^1\text{H NMR}$

(400 MHz, CDCl<sub>3</sub>)  $\delta$  = 7.63-7.54 (m, 4 H), 7.48 (d,  $J$  = 7.6 Hz, 2 H), 7.43-7.30 (m, 6 H), 7.19 (d,  $J$  = 7.6 Hz, 2 H), 4.10 (dd,  $J_1$  = 11.6 Hz,  $J_2$  = 2.4 Hz, 0.05 H), 2.53-2.27 (m, 5 H), 1.76 (d,  $J$  = 14.8 Hz, 1 H), 1.64-1.50 (m, 3 H), 0.99 (s, 3 H), 0.91 (s, 3 H); <sup>13</sup>C NMR (100 MHz, CDCl<sub>3</sub>)  $\delta$  = 170.9, 139.4, 135.9, 135.8, 134.77, 134.76, 130.7, 129.4, 128.7, 127.8, 84.2 (t,  $J_{C-D}$  = 22.6 Hz), 34.0, 32.9, 27.4, 26.5, 21.5, 19.3, 15.0; **HRMS** (ESI) calcd for C<sub>27</sub>H<sub>29</sub>DNaO<sub>2</sub>Si [M+Na<sup>+</sup>]: 438.1970, found: 438.1974.

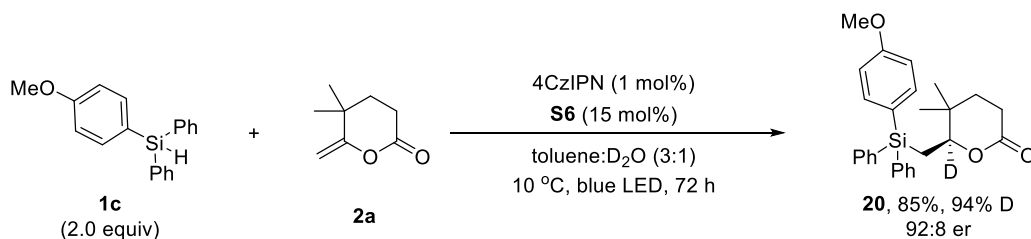

The reaction of 4CzIPN (1.8 mg, 0.002 mmol), **1c** (116.9 mg, 0.4 mmol), **2a** (28.6 mg, 0.2 mmol), **S6** (22.0 mg, 0.03 mmol), toluene (1.5 mL) and D<sub>2</sub>O (0.5 mL) afforded **20** (74.5 mg, 85%, 94% D) (eluent: petroleum ether/DCM/ether = 14/10/1) as a colorless solid: 92:8 er (HPLC conditions: Chiralcel AD-H column, hexane/*i*-PrOH = 98/2, 1.0 mL/min,  $\lambda$  = 214 nm,  $t_R$  (minor) = 19.8 min,  $t_R$  (major) = 23.9 min);  $[\alpha]_D^{25}$  = -57.0 ( $c$  = 0.50, CHCl<sub>3</sub>); **m.p.** 80-82 °C; <sup>1</sup>H NMR (400 MHz, CDCl<sub>3</sub>)  $\delta$  = 7.64-7.46 (m, 6 H), 7.44-7.29 (m, 6 H), 6.92 (d,  $J$  = 8.4 Hz, 2 H), 4.10 (dd,  $J_1$  = 11.6 Hz,  $J_2$  = 2.0 Hz, 0.06 H), 3.80 (s, 3 H), 2.52-2.28 (m, 2 H), 1.75 (d,  $J$  = 14.8 Hz, 1 H), 1.66-1.48 (m, 3 H), 1.00 (s, 3 H), 0.91 (s, 3 H); <sup>13</sup>C NMR (100 MHz, CDCl<sub>3</sub>)  $\delta$  = 171.0, 160.7, 137.5, 135.8, 135.02, 134.95, 129.4, 127.8, 125.0, 113.6, 84.3 (t,  $J_{C-D}$  = 22.6 Hz), 55.0, 34.0, 32.9, 27.4, 26.5, 19.3, 15.1; **HRMS** (ESI) calcd for C<sub>27</sub>H<sub>29</sub>DNaO<sub>3</sub>Si [M+Na<sup>+</sup>]: 454.1919, found: 454.1920.

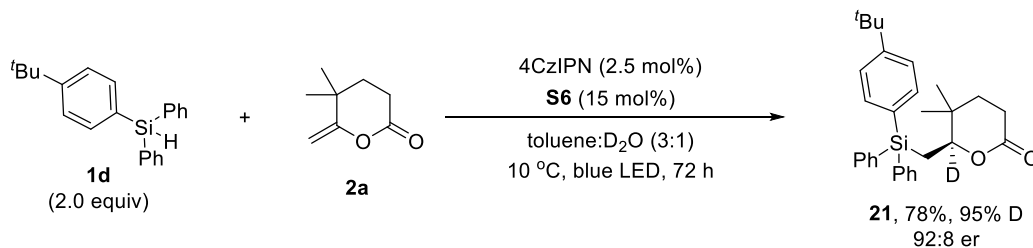

The reaction of 4CzIPN (4.2 mg, 0.005 mmol), **1d** (128.0 mg, 0.4 mmol), **2a** (28.6 mg, 0.2 mmol), **S6** (22.7 mg, 0.03 mmol), toluene (1.5 mL) and D<sub>2</sub>O (0.5 mL) afforded **21** (73.0 mg,

78%, 95% D) (eluent: petroleum ether/DCM/ether = 14/10/1) as a colorless solid: 92:8 er (HPLC conditions: Chiralcel AD-H column, hexane/*i*-PrOH = 98.5/1.5, 1.0 mL/min,  $\lambda$  = 214 nm,  $t_R$  (minor) = 7.5 min,  $t_R$  (major) = 9.8 min);  $[\alpha]_D^{25}$  = -59.7 ( $c$  = 0.51, CHCl<sub>3</sub>); **m.p.** 116-118 °C; **<sup>1</sup>H NMR** (400 MHz, CDCl<sub>3</sub>)  $\delta$  = 7.62-7.55 (m, 4 H), 7.54-7.49 (m, 2 H), 7.44-7.31 (m, 8 H), 4.11 (dd,  $J_1$  = 11.4 Hz,  $J_2$  = 2.2 Hz, 0.05 H), 2.50-2.30 (m, 2 H), 1.76 (d,  $J$  = 15.2 Hz, 1 H), 1.62-1.53 (m, 3 H), 1.32 (s, 9 H), 1.00 (s, 3 H), 0.91 (s, 3 H); **<sup>13</sup>C NMR** (100 MHz, CDCl<sub>3</sub>)  $\delta$  = 171.0, 152.4, 135.9, 135.8, 135.7, 134.8, 134.7, 130.8, 129.4, 127.7, 124.8, 84.2 (t,  $J_{C-D}$  = 22.2 Hz), 34.6, 33.9, 32.9, 31.2, 27.4, 26.5, 19.3, 15.0; **HRMS** (ESI) calcd for C<sub>30</sub>H<sub>35</sub>DNaO<sub>2</sub>Si [M+Na<sup>+</sup>]: 480.2440, found: 480.2440.

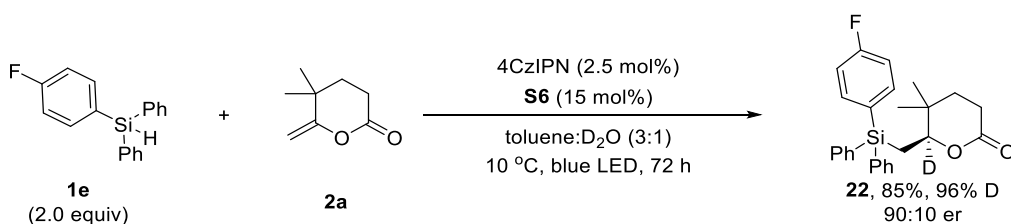

The reaction of 4CzIPN (4.2 mg, 0.005 mmol), **1e** (113.1 mg, 0.4 mmol), **2a** (28.7 mg, 0.2 mmol), **S6** (21.3 mg, 0.03 mmol), toluene (1.5 mL) and D<sub>2</sub>O (0.5 mL) afforded **22** (71.0 mg, 85%, 96% D) (eluent: petroleum ether/DCM/ether = 14/10/1) as a colorless solid: 90:10 er (HPLC conditions: Chiralcel AD-H column, hexane/*i*-PrOH = 98/2, 1.0 mL/min,  $\lambda$  = 214 nm,  $t_R$  (minor) = 10.7 min,  $t_R$  (major) = 12.9 min);  $[\alpha]_D^{25}$  = -61.2 ( $c$  = 0.50, CHCl<sub>3</sub>); **m.p.** 97-99 °C; **<sup>1</sup>H NMR** (400 MHz, CDCl<sub>3</sub>)  $\delta$  = 7.80-7.30 (m, 12 H), 7.07 (t,  $J$  = 8.8 Hz, 2 H), 4.08 (dd,  $J_1$  = 11.4 Hz,  $J_2$  = 2.2 Hz, 0.04 H), 2.60-2.20 (m, 2 H), 1.85-1.41 (m, 4 H), 1.10-0.79 (m, 6 H); **<sup>13</sup>C NMR** (100 MHz, CDCl<sub>3</sub>)  $\delta$  = 170.9, 164.0 (d,  $J_{C-F}$  = 247.7 Hz), 138.1, 138.0, 135.8, 135.7, 134.4 (d,  $J_{C-F}$  = 29.9 Hz), 129.9 (d,  $J_{C-F}$  = 3.7 Hz), 129.64, 129.62, 127.9, 115.1 (d,  $J_{C-F}$  = 19.6 Hz), 34.0, 32.9, 27.4, 26.5, 19.2, 15.0; **<sup>19</sup>F NMR** (376 MHz, CDCl<sub>3</sub>)  $\delta$  = -111.1; **HRMS** (ESI) calcd for C<sub>26</sub>H<sub>26</sub>DFNaO<sub>2</sub>Si [M+Na<sup>+</sup>]: 442.1719, found: 442.1714.

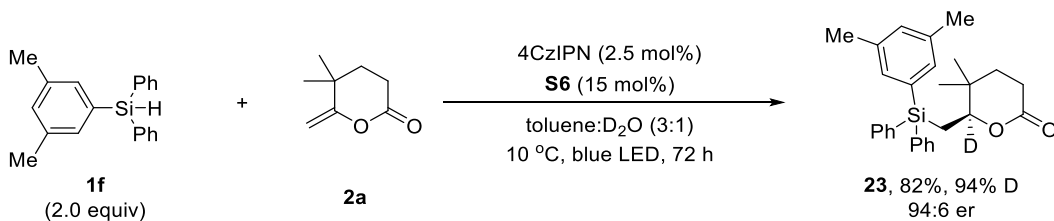



The reaction of 4CzIPN (4.1 mg, 0.005 mmol), **1f** (116.1 mg, 0.4 mmol), **2a** (28.1 mg, 0.2 mmol), **S6** (21.8 mg, 0.03 mmol), toluene (1.5 mL) and D<sub>2</sub>O (0.5 mL) afforded **23** (71.0 mg, 82%, 94% D) (eluent: petroleum ether/DCM/ether = 14/10/1) as a colorless solid: 94:6 er (HPLC conditions: Chiralcel AD-H column, hexane/*i*-PrOH = 98/2, 1.0 mL/min,  $\lambda$  = 214 nm,  $t_R$  (minor) = 6.0 min,  $t_R$  (major) = 7.1 min);  $[\alpha]_D^{25}$  = -53.2 ( $c$  = 0.22, CHCl<sub>3</sub>); **m.p.** 78-79 °C; **<sup>1</sup>H NMR** (400 MHz, CDCl<sub>3</sub>)  $\delta$  = 7.63-7.53 (m, 4 H), 7.44-7.32 (m, 6 H), 7.18 (s, 2 H), 7.04 (s, 1 H), 4.10 (dd,  $J_1$  = 11.4 Hz,  $J_2$  = 2.2 Hz, 0.06 H), 2.50-2.22 (m, 8 H), 1.75 (d,  $J$  = 14.8 Hz, 1 H), 1.62-1.51 (m, 3 H), 1.00 (s, 3 H), 0.91 (s, 3 H); **<sup>13</sup>C NMR** (100 MHz, CDCl<sub>3</sub>)  $\delta$  = 171.0, 137.1, 135.94, 135.91, 134.8, 134.6, 134.2, 133.5, 131.3, 129.41, 129.39, 127.8, 84.2 (t,  $J_{C-D}$  = 22.6 Hz), 34.0, 33.0, 27.4, 26.5, 21.4, 19.4, 15.0; **HRMS** (ESI) calcd for C<sub>28</sub>H<sub>31</sub>DNaO<sub>2</sub>Si [M+Na<sup>+</sup>]:452.2127, found: 452.2122.

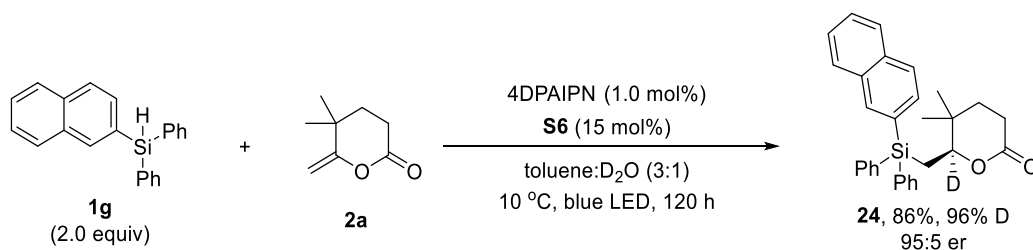

The reaction of 4DPAIPN (2.1 mg, 0.002 mmol), **1g** (126.1 mg, 0.4 mmol), **2a** (29.0 mg, 0.2 mmol), **S6** (21.3 mg, 0.03 mmol), toluene (1.5 mL) and D<sub>2</sub>O (0.5 mL) for 120 hours afforded **24** (80.1 mg, 86 %, 96% D) (eluent: petroleum ether/DCM/ether = 14/10/1) as a colorless solid: 95:5 er (HPLC conditions: Chiralcel AD-H column, hexane/*i*-PrOH = 95.5/4.5, 1.0 mL/min,  $\lambda$  = 214 nm,  $t_R$ (minor) = 10.7 min,  $t_R$ (major) = 12.8 min);  $[\alpha]_D^{25}$  = -56.7 ( $c$  = 0.21, CHCl<sub>3</sub>); **m.p.** 63-67 °C; **<sup>1</sup>H NMR** (400 MHz, CDCl<sub>3</sub>)  $\delta$  = 8.11 (s, 1 H), 7.88-7.73 (m, 3 H), 7.71-7.54 (m, 5 H), 7.53-7.29 (m, 8 H), 4.14 (dd,  $J_1$  = 11.8 Hz,  $J_2$  = 2.2 Hz, 0.04 H), 2.53-2.25 (m, 2 H), 1.86 (d,  $J$  = 15.2 Hz, 1 H), 1.72-1.46 (m, 3 H), 1.02 (s, 3 H), 0.92 (s, 3 H); **<sup>13</sup>C NMR** (100 MHz, CDCl<sub>3</sub>)  $\delta$  = 170.9, 137.2, 135.93, 135.90, 134.53, 134.45, 133.8, 132.8, 131.9, 131.6, 129.6, 129.5, 128.4, 127.9, 127.6, 127.0, 126.7, 125.9, 34.0, 32.9, 27.4, 26.5, 19.2, 15.0; **HRMS** (ESI) calcd for C<sub>30</sub>H<sub>29</sub>DNaO<sub>2</sub>Si [M+Na<sup>+</sup>]: 474.1970, found: 474.1963.

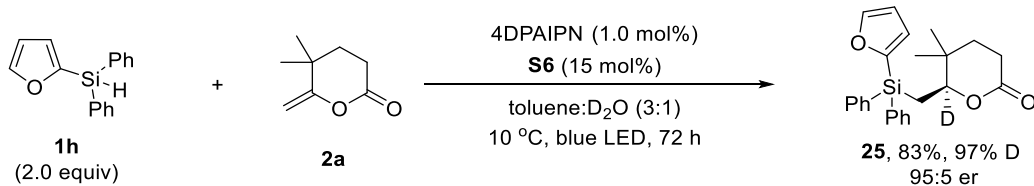

The reaction of 4DPAIPN (2.0 mg, 0.002 mmol), **1h** (100.9 mg, 0.4 mmol), **2a** (28.0 mg, 0.2 mmol), **S6** (21.1 mg, 0.03 mmol), toluene (1.5 mL) and D<sub>2</sub>O (0.5 mL) afforded **25** (64.6 mg, 83%, 97% D) (eluent: petroleum ether/DCM/ether = 14/10/1) as a colorless solid: 95:5 er (HPLC conditions: Chiralcel AD-H column, hexane/*i*-PrOH = 98.7/1.3, 1.0 mL/min,  $\lambda = 214$  nm,  $t_R$  (minor) = 17.0 min,  $t_R$  (major) = 18.5 min);  $[\alpha]_D^{25} = -68.0$  ( $c = 0.50$ , CHCl<sub>3</sub>); **m.p.** 85-87 °C; **<sup>1</sup>H NMR** (400 MHz, CDCl<sub>3</sub>)  $\delta = 7.75$  (d,  $J = 1.6$  Hz, 1 H), 7.67-7.58 (m, 4 H), 7.46-7.32 (m, 6 H), 6.83 (d,  $J = 3.6$  Hz, 1 H), 6.45 (dd,  $J_1 = 3.2$  Hz,  $J_2 = 1.6$  Hz, 1 H), 4.15 (dd,  $J_1 = 11.2$  Hz,  $J_2 = 2.4$  Hz, 0.03 H), 2.56-2.30 (m, 2 H), 1.71 (d,  $J = 15.2$  Hz, 1 H), 1.65-1.54 (m, 3 H), 0.99 (s, 3 H), 0.93 (s, 3 H); **<sup>13</sup>C NMR** (100 MHz, CDCl<sub>3</sub>)  $\delta = 171.0, 155.1, 147.8, 135.6, 135.5, 133.4, 133.3, 129.8, 127.90, 127.86, 124.1, 109.8, 84.0$  (t,  $J_{C-D} = 22.2$  Hz), 33.9, 32.9, 27.4, 26.4, 19.3, 14.8; **HRMS** (ESI) calcd for C<sub>24</sub>H<sub>25</sub>DNaO<sub>3</sub>Si [M+Na<sup>+</sup>]: 414.1606, found: 414.1607.

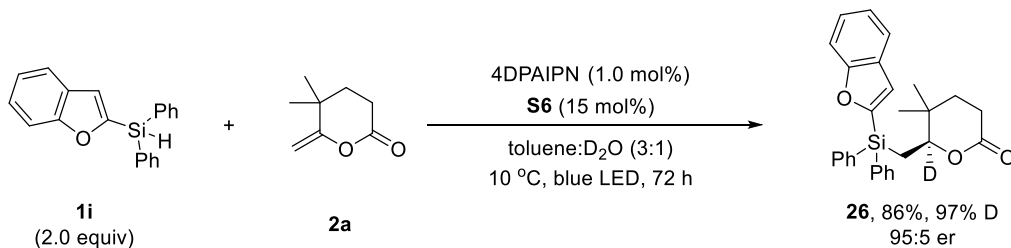

The reaction of 4DPAIPN (1.8 mg, 0.002 mmol), **1i** (120.7 mg, 0.4 mmol), **2a** (28.5 mg, 0.2 mmol), **S6** (21.7 mg, 0.03 mmol), toluene (1.5 mL) and D<sub>2</sub>O (0.5 mL) afforded **26** (77.6 mg, 86%, 97% D) (eluent: petroleum ether/DCM/ether = 14/10/1) as a colorless solid: 95:5 er (HPLC conditions: Chiralcel AD-H column, hexane/*i*-PrOH = 98/2, 1.0 mL/min,  $\lambda = 214$  nm,  $t_R$  (minor) = 34.0 min,  $t_R$  (major) = 37.3 min);  $[\alpha]_D^{25} = -66.4$  ( $c = 0.50$ , CHCl<sub>3</sub>); **m.p.** 98-100 °C; **<sup>1</sup>H NMR** (400 MHz, CDCl<sub>3</sub>)  $\delta = 7.77$ -7.61 (m, 4 H), 7.58 (d,  $J = 7.6$  Hz, 1 H), 7.52 (d,  $J = 8.0$  Hz, 1 H), 7.48-7.35 (m, 6 H), 7.32-7.26 (m, 1 H), 7.24-7.17 (m, 1 H), 7.12 (s, 1 H), 4.20 (dd,  $J_1 = 11.2$  Hz,  $J_2 = 2.8$  Hz, 0.03 H), 2.52-2.32 (m, 2 H), 1.80 (d,  $J = 14.8$  Hz, 1 H), 1.69 (d,  $J = 15.2$  Hz, 1 H), 1.64-1.56 (m, 2 H), 1.01 (s, 3 H), 0.95 (s, 3 H); **<sup>13</sup>C NMR** (100 MHz, CDCl<sub>3</sub>)  $\delta = 170.8, 158.7, 158.5, 135.8, 135.6, 132.8, 132.5, 130.00, 129.98, 128.0, 127.9, 127.8, 124.7, 122.5, 121.4, 120.6,$

111.4, 84.0 (t,  $J_{C-D} = 22.3$  Hz), 33.9, 32.9, 27.4, 26.4, 19.2, 14.7; **HRMS** (ESI) calcd for  $C_{28}H_{27}DNaO_3Si [M+Na^+]$ : 464.1763, found: 464.1763.

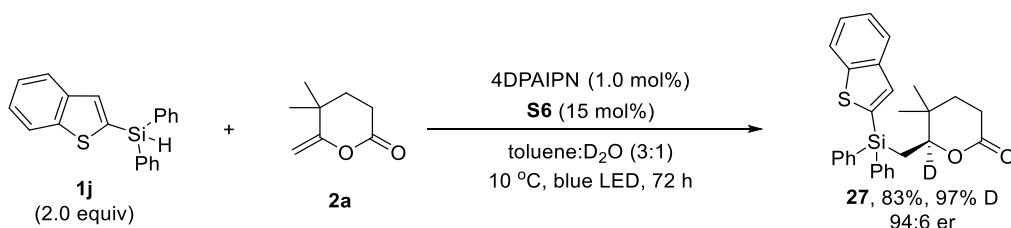

The reaction of 4DPAIPN (1.9 mg, 0.002 mmol), **1j** (126.0 mg, 0.4 mmol), **2a** (28.1 mg, 0.2 mmol), **S6** (22.0 mg, 0.03 mmol), toluene (1.5 mL) and  $D_2O$  (0.5 mL) afforded **27** (76.5 mg, 83%, 97% D) (eluent: petroleum ether/DCM/ether = 14/10/1) as a colorless solid: 94:6 er (HPLC conditions: Chiralcel AD-H column, hexane/*i*-PrOH = 97/3, 1.0 mL/min,  $\lambda = 214$  nm,  $t_R$  (minor) = 29.7 min,  $t_R$  (major) = 31.7 min);  $[\alpha]_D^{25} = -46.6$  ( $c = 0.50$ ,  $CHCl_3$ ); **m.p.** 99-100 °C;  **$^1H$  NMR** (400 MHz,  $CDCl_3$ )  $\delta = 7.92$ -7.75 (m, 2 H), 7.73-7.64 (m, 4 H), 7.62 (s, 1 H), 7.52-7.28 (m, 8 H), 4.21 (dd,  $J_1 = 11.8$  Hz,  $J_2 = 2.6$  Hz, 0.03 H), 2.53-2.35 (m, 2 H), 1.84 (d,  $J = 15.2$  Hz, 1 H), 1.72-1.49 (m, 3 H), 1.02 (s, 3 H), 0.95 (s, 3 H);  **$^{13}C$  NMR** (100 MHz,  $CDCl_3$ )  $\delta = 170.7$ , 144.3, 140.9, 136.2, 135.7, 135.6, 135.3, 133.73, 133.72, 129.91, 129.88, 127.92, 127.89, 124.5, 124.0, 123.9, 122.1, 84.1 (t,  $J_{C-D} = 22.0$  Hz), 34.0, 32.9, 27.4, 26.4, 19.1, 15.8; **HRMS** (ESI) calcd for  $C_{28}H_{27}DNaO_2SSi [M+Na^+]$ : 480.1534, found: 480.1537.

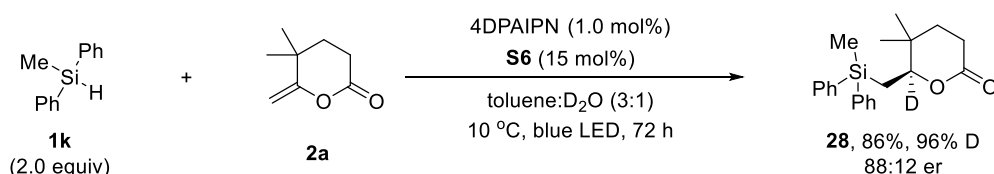

The reaction of 4DPAIPN (1.9 mg, 0.002 mmol), **1k** (80.3 mg, 0.4 mmol), **2a** (28.3 mg, 0.2 mmol), **S6** (22.1 mg, 0.03 mmol), toluene (1.5 mL) and  $D_2O$  (0.5 mL) afforded **28** (58.7 mg, 86%, 96% D) (eluent: petroleum ether/DCM/ether = 14/10/1) as a colorless oil: 88:12 er (HPLC conditions: Chiralcel AD-H column, hexane/*i*-PrOH = 99.5/0.5, 1.0 mL/min,  $\lambda = 214$  nm,  $t_R$  (minor) = 25.7 min,  $t_R$  (major) = 31.3 min);  $[\alpha]_D^{25} = -79.3$  ( $c = 0.22$ ,  $CHCl_3$ );  **$^1H$  NMR** (400 MHz,  $CDCl_3$ )  $\delta = 7.64$ -7.47 (m, 4 H), 7.46-7.27 (m, 6 H), 4.09-4.03 (m, 0.04 H), 2.54-2.38 (m, 2 H), 1.67-1.53 (m, 2 H), 1.35 (s, 2 H), 0.97 (s, 3 H), 0.92 (s, 3 H), 0.75 (s, 3 H);  **$^{13}C$  NMR** (100 MHz,  $CDCl_3$ )  $\delta = 171.3$ , 137.2, 135.8, 134.7, 134.4, 129.3, 129.2, 127.9, 127.8, 84.9 (t,  $J_{C-D} = 21.9$  Hz),

33.9, 32.8, 27.4, 26.4, 19.2, 15.5, -3.1; **HRMS** (ESI) calcd for  $C_{21}H_{25}DNaO_2Si$  [ $M+Na^+$ ]: 362.1657, found: 362.1655.

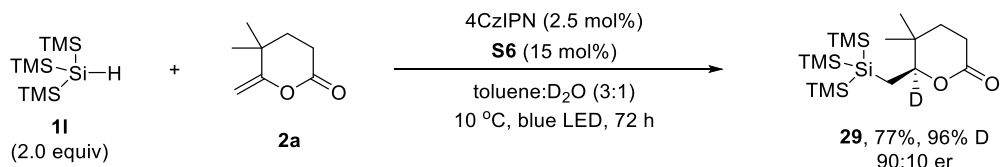

The reaction of 4CzIPN (4.3 mg, 0.005 mmol), **1I** (62.7 mg, 0.26 mmol), **2a** (28.2 mg, 0.2 mmol), **S6** (23.0 mg, 0.03 mmol), toluene (1.5 mL) and  $D_2O$  (0.5 mL) afforded **29** (59.8 mg, 77%, 96% D) (eluent: petroleum ether/ethyl acetate = 20/1) as a colorless solid: 90:10 er (HPLC conditions: Chiralcel OD-H column, hexane/*i*-PrOH = 99.3/0.7, 0.5 mL/min,  $\lambda = 214$  nm,  $t_R$  (minor) = 8.7 min,  $t_R$  (major) = 9.1 min);  $[\alpha]_D^{25} = -57.8$  ( $c = 0.50$ ,  $CHCl_3$ ); **m.p.** 61-62 °C,  **$^1H$  NMR** (400 MHz,  $CDCl_3$ )  $\delta = 4.02$  (dd,  $J_1 = 11.6$  Hz,  $J_2 = 2.4$  Hz, 0.04 H), 2.60-2.42 (m, 2 H), 1.76-1.50 (m, 2 H), 1.10-0.96 (m, 5 H), 0.92 (s, 3 H), 0.20 (s, 27 H);  **$^{13}C$  NMR** (100 MHz,  $CDCl_3$ )  $\delta = 171.3$ , 86.9 (t,  $J_{C-D} = 22.4$  Hz), 34.5, 33.5, 27.7, 26.9, 18.7, 8.7, 1.1; **HRMS** (ESI) calcd for  $C_{17}H_{39}DNaO_2Si_4$  [ $M+Na^+$ ]: 412.2060, found: 412.2054.

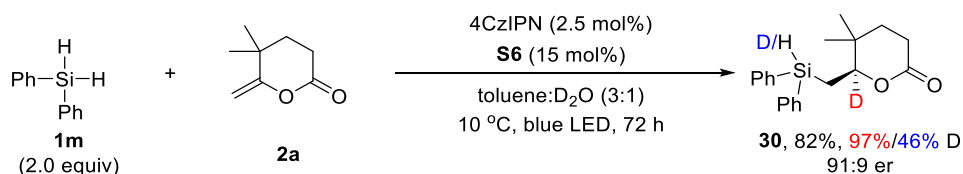

The reaction of 4CzIPN (4.1 mg, 0.005 mmol), **1m** (75.1 mg, 0.4 mmol), **2a** (28.2 mg, 0.2 mmol), **S6** (22.2 mg, 0.03 mmol), toluene (1.5 mL) and  $D_2O$  (0.5 mL) afforded **30** (53.8 mg, 82%, 97/46% D) (eluent: petroleum ether/DCM/ether = 14/10/1) as a colorless solid: 91:9 er (HPLC conditions: Chiralcel OJ-H column, hexane/*i*-PrOH = 98.5/1.5, 1.0 mL/min,  $\lambda = 214$  nm,  $t_R$  (major) = 19.8 min,  $t_R$  (minor) = 25.0 min);  $[\alpha]_D^{25} = -91.8$  ( $c = 0.27$ ,  $CHCl_3$ ); **m.p.** 43-44 °C;  **$^1H$  NMR** (400 MHz,  $CDCl_3$ )  $\delta = 7.70$ -7.52 (m, 4 H), 7.47-7.29 (m, 6 H), 5.08 (dd,  $J_1 = 5.0$  Hz,  $J_2 = 2.2$  Hz, 0.54 H), 4.11 (dd,  $J_1 = 11.2$  Hz,  $J_2 = 3.2$  Hz, 0.03 H), 2.57-2.40 (m, 2 H), 1.61 (t,  $J = 7.4$  Hz, 2 H), 1.53-1.35 (m, 2 H), 1.04-0.87 (m, 6 H);  **$^{13}C$  NMR** (100 MHz,  $CDCl_3$ )  $\delta = 171.2$ , 135.3, 135.1, 133.7, 133.3, 129.74, 129.67, 128.1, 128.0, 84.7 (t,  $J_{C-D} = 22.3$  Hz), 33.9, 32.8, 27.4, 26.4, 19.0, 14.3, 14.2; **HRMS** (ESI) calcd for  $C_{20}H_{23}DNaO_2Si$  [ $M+Na^+$ ]: 348.1501, found: 348.1497.

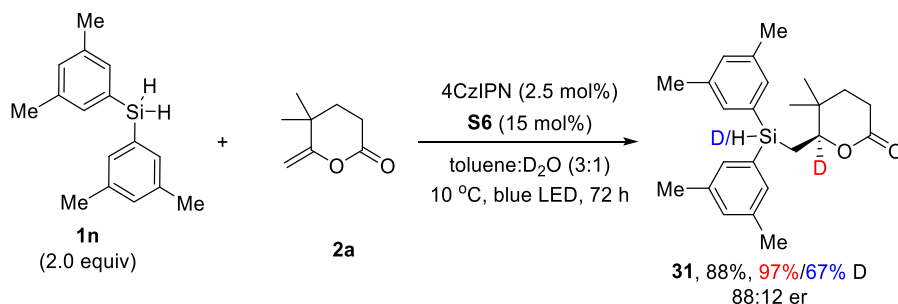

The reaction of 4CzIPN (4.1 mg, 0.005 mmol), **1n** (95.7 mg, 0.4 mmol), **2a** (28.7 mg, 0.2 mmol), **S6** (22.1 mg, 0.03 mmol), toluene (1.5 mL) and  $\text{D}_2\text{O}$  (0.5 mL) afforded **31** (68.8 mg, 88%, 97%/67% D) (eluent: petroleum ether/DCM/ether = 14/10/1) as a colorless solid: 88:12 er (HPLC conditions: Chiralcel AD-H column, hexane/*i*-PrOH = 99/1, 1.0 mL/min,  $\lambda = 214$  nm,  $t_R$  (major) = 7.4 min,  $t_R$  (minor) = 8.5 min);  $[\alpha]_D^{25} = -69.2$  ( $c = 0.51$ ,  $\text{CHCl}_3$ ); **m.p.** 74-75 °C;  $^1\text{H NMR}$  (400 MHz,  $\text{CDCl}_3$ )  $\delta = 7.24$  (s, 2 H), 7.18 (s, 2 H), 7.03 (d,  $J = 9.6$  Hz, 2 H), 4.99 (dd,  $J_1 = 4.8$  Hz,  $J_2 = 2.4$  Hz, 0.33 H), 4.11 (dd,  $J_1 = 10.0$  Hz,  $J_2 = 4.0$  Hz, 0.03 H), 2.53-2.44 (m, 2 H), 2.39-2.22 (m, 12 H), 1.62 (t,  $J = 7.2$  Hz, 2 H), 1.50-1.30 (m, 2 H), 1.03-0.89 (m, 6 H);  $^{13}\text{C NMR}$  (100 MHz,  $\text{CDCl}_3$ )  $\delta = 171.4$ , 137.42, 137.36, 133.81, 133.78, 133.2, 133.1, 132.8, 131.6, 131.5, 84.8 (t,  $J_{\text{C-D}} = 22.2$  Hz), 34.0, 33.0, 27.5, 26.5, 21.39, 21.36, 19.3, 14.5, 14.4; **HRMS** (ESI) calcd for  $\text{C}_{24}\text{H}_{30}\text{D}_2\text{NaO}_2\text{Si}$  [ $\text{M}+\text{Na}^+$ ]: 405.2189, found: 405.2182.

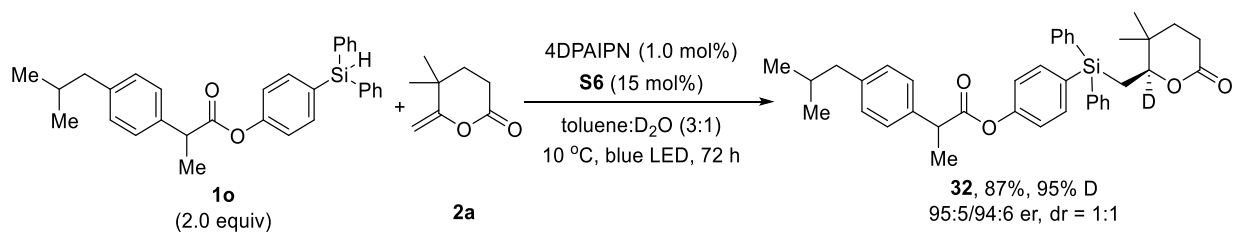

The reaction of 4DPAIPN (2.1 mg, 0.002 mmol), **1o** (186.3 mg, 0.4 mmol), **2a** (28.1 mg, 0.2 mmol), **S6** (22.1 mg, 0.03 mmol), toluene (1.5 mL) and  $\text{D}_2\text{O}$  (0.5 mL) afforded **32** (105.6 mg, 87%, 95% D) (eluent: petroleum ether/DCM/ether = 14/10/1) as a colorless oil: 95:5/94:6 er, dr = 1:1 (HPLC conditions: Chiralcel IC-H column, hexane/*i*-PrOH = 90/10, 0.5 mL/min,  $\lambda = 214$  nm,  $t_1 = 25.7$  min,  $t_2 = 28.9$  min,  $t_3 = 30.3$  min,  $t_4 = 34.3$  min);  $[\alpha]_D^{25} = -39.2$  ( $c = 0.26$ ,  $\text{CHCl}_3$ );  $^1\text{H NMR}$  (400 MHz,  $\text{CDCl}_3$ )  $\delta = 7.62$ -7.47 (m, 6 H), 7.45-7.32 (m, 6 H), 7.29 (d,  $J = 8.0$  Hz, 2 H), 7.13 (d,  $J = 8.0$  Hz, 2 H), 7.01 (d,  $J = 8.4$  Hz, 2 H), 4.07 (dd,  $J_1 = 11.6$  Hz,  $J_2 = 2.0$  Hz, 0.05 H), 3.93 (q,  $J = 7.2$  Hz, 1 H), 2.56-2.24 (m, 4 H), 1.93-1.80 (m, 1 H), 1.75 (d,  $J = 14.8$  Hz, 1 H),

1.65-1.44 (m, 6 H), 0.99 (s, 3 H), 0.94-0.81 (m, 9 H);  $^{13}\text{C}$  NMR (100 MHz,  $\text{CDCl}_3$ )  $\delta$  = 173.1, 170.9, 152.1, 140.8, 137.2, 137.1, 135.8, 134.29, 134.27, 131.8, 129.6, 129.5, 127.9, 127.1, 120.9, 84.2 (t,  $J_{\text{C-D}}$  = 22.3 Hz), 45.2, 45.0, 33.9, 32.9, 30.1, 27.4, 26.5, 22.4, 19.2, 18.4, 14.9; **HRMS** (ESI) calcd for  $\text{C}_{39}\text{H}_{43}\text{DNaO}_4\text{Si}$  [ $\text{M}+\text{Na}^+$ ]: 628.2964, found: 628.2957.

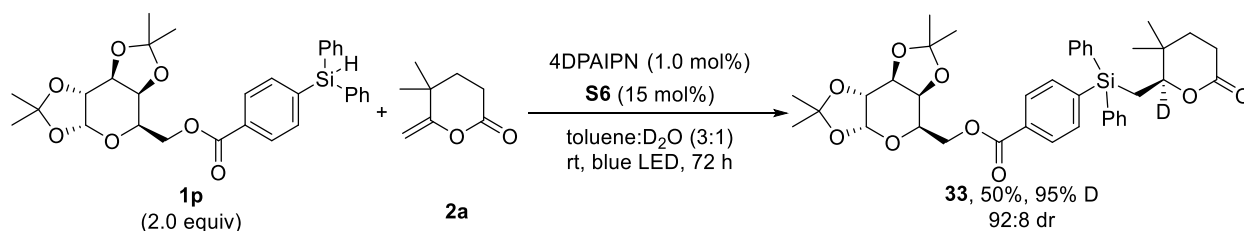

The reaction of 4DPAIPN (1.9 mg, 0.002 mmol), **1p** (206.1 mg, 0.4 mmol), **2a** (28.0 mg, 0.2 mmol), **S6** (21.2 mg, 0.03 mmol), toluene (1.5 mL) and  $\text{D}_2\text{O}$  (0.5 mL) under room temperature afforded **33** (68.6 mg, 50%, 95% D) (eluent: petroleum ether/ethyl acetate = 7/3) as a colorless oil: 92:8 dr (HPLC conditions: Chiralcel AD-H column, hexane/*i*-PrOH = 90/10, 1.0 mL/min,  $\lambda$  = 214 nm,  $t_1$  (minor) = 9.6 min,  $t_2$  (major) = 14.2 min);  $[\alpha]_{\text{D}}^{25}$  = -62.5 ( $c$  = 0.12,  $\text{CHCl}_3$ );  $^1\text{H}$  NMR (400 MHz,  $\text{CDCl}_3$ )  $\delta$  = 8.02 (d,  $J$  = 8.4 Hz, 2 H), 7.67 (d,  $J$  = 8.4 Hz, 2 H), 7.60-7.50 (m, 4 H), 7.47-7.33 (m, 6 H), 5.56 (d,  $J$  = 4.8 Hz, 1 H), 4.65 (dd,  $J_1$  = 7.8 Hz,  $J_2$  = 2.6 Hz, 1 H), 4.54-4.40 (m, 2 H), 4.38-4.30 (m, 2 H), 4.22-4.14 (m, 1 H), 4.09 (dd,  $J_1$  = 14.2 Hz,  $J_2$  = 2.6 Hz, 0.05 H), 2.52-2.30 (m, 2 H), 1.81 (d,  $J$  = 15.2 Hz, 1 H), 1.64-1.55 (m, 3 H), 1.52 (s, 3 H), 1.48 (s, 3 H), 1.39-1.30 (m, 6 H), 1.02 (s, 3 H), 0.93 (s, 3 H);  $^{13}\text{C}$  NMR (100 MHz,  $\text{CDCl}_3$ )  $\delta$  = 170.7, 166.5, 141.1, 135.85, 135.82, 135.81, 133.8, 133.7, 130.8, 129.7, 128.6, 128.0, 109.6, 108.8, 96.3, 84.4 (t,  $J_{\text{C-D}}$  = 21.6 Hz), 71.0, 70.7, 70.5, 66.0, 63.8, 34.0, 32.9, 27.4, 26.5, 26.0, 25.9, 24.9, 24.5, 19.1, 14.8; **HRMS** (ESI) calcd for  $\text{C}_{39}\text{H}_{45}\text{DNaO}_9\text{Si}$  [ $\text{M}+\text{Na}^+$ ]: 710.2866, found: 710.2866.

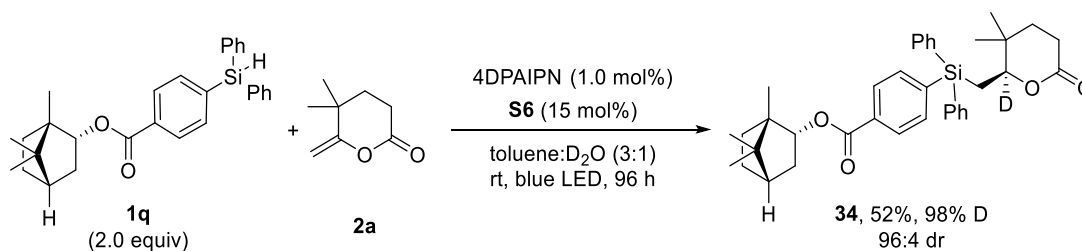

The reaction of 4DPAIPN (2.0 mg, 0.002 mmol), **1q** (167.6 mg, 0.4 mmol), **2a** (28.6 mg, 0.2 mmol), **S6** (22.0 mg, 0.03 mmol), toluene (1.5 mL) and D<sub>2</sub>O (0.5 mL) for 96 hours under room temperature afforded **34** (55.5 mg, 52%, 98% D) (eluent: petroleum ether/ethyl acetate = 5/1) as a colorless oil: 96:4 dr (HPLC conditions: Chiralcel AD-H column, hexane/*i*-PrOH = 98/2, 1.0 mL/min,  $\lambda = 214$  nm,  $t_1$  (minor) = 15.4 min,  $t_2$  (major) = 17.2 min);  $[\alpha]_D^{25} = -46.6$  ( $c = 0.50$ , CHCl<sub>3</sub>); <sup>1</sup>H NMR (400 MHz, CDCl<sub>3</sub>)  $\delta = 8.04$  (d,  $J = 8.0$  Hz, 2 H), 7.69 (d,  $J = 8.0$  Hz, 2 H), 7.61-7.51 (m, 4 H), 7.47-7.32 (m, 6 H), 5.15-5.07 (m, 1 H), 4.10 (dd,  $J_1 = 11.4$  Hz,  $J_2 = 2.6$  Hz, 0.02 H), 2.53-2.33 (m, 3 H), 2.17-2.06 (m, 1 H), 1.82 (d,  $J = 15.2$  Hz, 1 H), 1.73 (t,  $J = 8.8$  Hz, 1 H), 1.67-1.53 (m, 3 H), 1.46-1.20 (m, 3 H), 1.11 (dd,  $J_1 = 13.8$  Hz,  $J_2 = 3.4$  Hz, 1 H), 1.02 (s, 3 H), 0.98-0.86 (m, 12 H); <sup>13</sup>C NMR (100 MHz, CDCl<sub>3</sub>)  $\delta = 170.8, 166.9, 140.8, 135.9, 135.85, 135.79, 134.0, 133.7, 131.6, 129.7, 128.5, 128.0, 84.2$  (t,  $J_{C-D} = 22.1$  Hz), 80.6, 49.1, 47.9, 45.0, 36.9, 34.0, 32.9, 28.0, 27.4, 27.3, 26.5, 19.7, 19.1, 18.9, 14.8, 13.6; HRMS (ESI) calcd for C<sub>37</sub>H<sub>43</sub>DNaO<sub>4</sub>Si [M+Na<sup>+</sup>]: 604.2964, found: 604.2951.

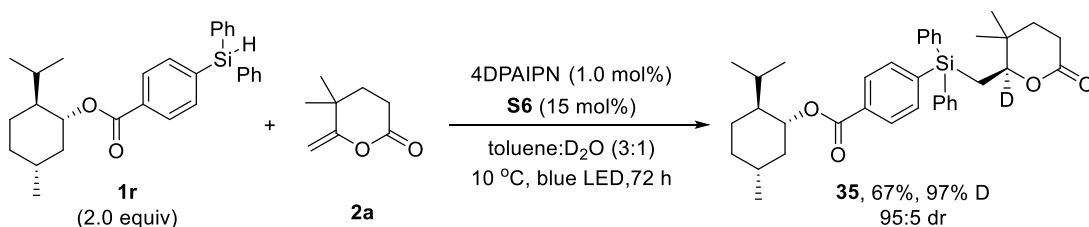

The reaction of 4DPAIPN (1.8 mg, 0.002 mmol), **1r** (179.1 mg, 0.4 mmol), **2a** (29.0 mg, 0.2 mmol), **S6** (22.1 mg, 0.03 mmol), toluene (1.5 mL) and D<sub>2</sub>O (0.5 mL) afforded **35** (78.5 mg, 67%, 97% D) (eluent: petroleum ether/DCM/ether = 14/10/1) as a colorless oil: 95:5 dr (HPLC conditions: Chiralcel AD-H column, hexane/*i*-PrOH = 95/5, 1.0 mL/min,  $\lambda = 214$  nm,  $t_1$  (minor) = 10.3 min,  $t_2$  (major) = 14.3 min);  $[\alpha]_D^{25} = -68.3$  ( $c = 0.22$ , CHCl<sub>3</sub>); <sup>1</sup>H NMR (400 MHz, CDCl<sub>3</sub>)  $\delta = 8.02$  (d,  $J = 8.0$  Hz, 2 H), 7.68 (d,  $J = 8.4$  Hz, 2 H), 7.60-7.52 (m, 4 H), 7.47-7.33 (m, 6 H), 4.93 (td,  $J_1 = 10.8$  Hz,  $J_2 = 4.4$  Hz, 1 H), 4.10 (dd,  $J_1 = 11.6$  Hz,  $J_2 = 2.4$  Hz, 0.03 H), 2.55-2.28 (m, 2 H), 2.18-2.05 (m, 1 H), 2.03-1.91 (m, 1 H), 1.81 (d,  $J = 14.8$  Hz, 1 H), 1.76-1.67 (m, 2 H), 1.65-1.48 (m, 6 H), 1.20-1.04 (m, 2 H), 1.02 (s, 3 H), 0.95-0.89 (m, 9 H), 0.79 (d,  $J = 6.8$  Hz, 3 H); <sup>13</sup>C NMR (100 MHz, CDCl<sub>3</sub>)  $\delta = 170.8, 166.1, 140.7, 135.83, 135.81, 135.77, 134.9, 133.9, 133.7, 131.6, 129.7, 128.5, 127.9, 74.8, 47.2, 40.9, 34.2, 34.0, 32.9, 31.4, 27.4, 26.5, 26.3, 23.4,$

22.0, 20.8, 19.1, 16.4, 14.7; **HRMS** (ESI) calcd for  $C_{37}H_{45}DNaO_4Si$  [ $M+Na^+$ ]: 606.3120, found: 606.3111.

#### 4. Unsuccessful Substrates

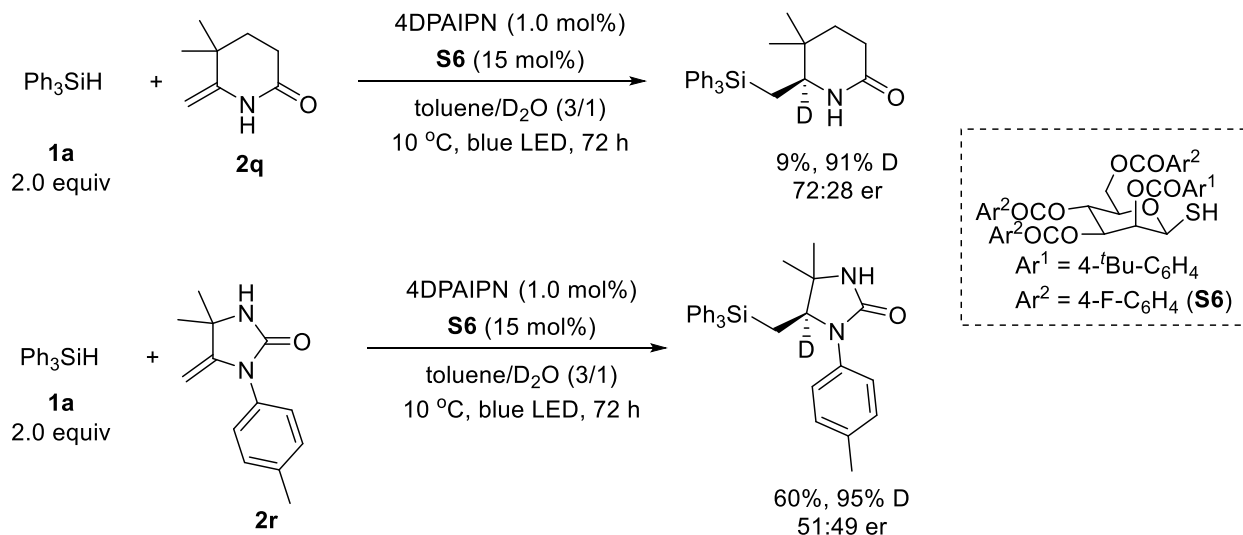

#### 5. Synthetic applications

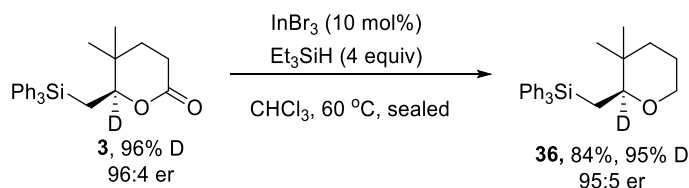

Following a reported procedure,<sup>7</sup> **3** (46.5 mg, 0.1 mmol),  $InBr_3$  (4.2 mg, 0.01 mmol),  $Et_3SiH$  (0.1 mL, 0.4 mmol), and freshly distilled  $CHCl_3$  (1.0 mL) were sequentially added to a screw-capped vial under  $N_2$  atmosphere. The vial was sealed with a cap containing a PTFE septum. During the stirring of the reaction mixture at 60 °C (oil bath temperature), the solution turned from colorless to yellow, then to orange. After the reaction is complete as monitored by TLC,  $H_2O$  (3 mL) was added and the resulting orange suspension was stirred continuously until the disappearance of the color. The aqueous layer was extracted with  $CH_2Cl_2$  (5 mL), the combined organic phase was dried over anhydrous  $Na_2SO_4$  filtered, and then evaporated under reduced pressure. The residue was purified by flash column chromatography (eluent: petroleum ether/ethyl acetate = 50/1) to give the product **36** (32.5 mg, 84%, 95% D) as a white solid: 95:5 er (HPLC conditions: Chiralcel AD-H column,  $CO_2/i\text{-PrOH} = 95/5$ , 1 mL/min,  $\lambda = 230\text{ nm}$ ,  $t_R$



(minor) = 3.2 min,  $t_R$  (major) = 3.6 min);  $[\alpha]_D^{25} = -15.0$  ( $c = 0.13$ ,  $\text{CHCl}_3$ ); **m.p.** 44-45 °C;  **$^1\text{H}$  NMR** (400 MHz,  $\text{CDCl}_3$ )  $\delta = 7.64$ -7.47 (m, 6 H), 7.43-7.26 (m, 9 H), 3.70-3.56 (m, 1 H), 3.02 (dd,  $J_1 = 11.4$  Hz,  $J_2 = 2.6$  Hz, 0.05 H), 2.87-2.68 (m, 1 H), 1.84-1.36 (m, 4 H), 1.23-1.09 (m, 2 H), 0.99 (s, 3 H), 0.77 (s, 3 H);  **$^{13}\text{C}$  NMR** (100 MHz,  $\text{CDCl}_3$ )  $\delta = 136.0$ , 135.9, 129.0, 127.5, 81.9 (t,  $J_{\text{C-D}} = 20.9$  Hz), 68.3, 38.8, 33.7, 27.8, 23.0, 18.6, 14.5; **HRMS** (ESI) calcd for  $\text{C}_{26}\text{H}_{29}\text{DNaOSi} [\text{M}+\text{Na}^+]$ : 410.2021, found: 410.2017.

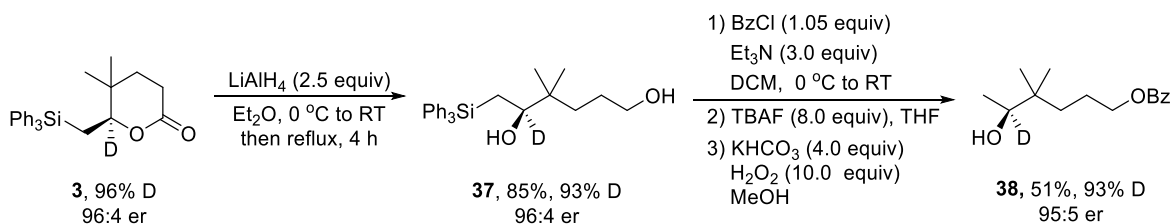

To a stirred suspension of lithium aluminum hydride (10.3 mg, 0.25 mmol) in dry  $\text{Et}_2\text{O}$  (4 mL) was added dropwise a solution of **3** (40.1 mg, 0.1 mmol) in  $\text{Et}_2\text{O}$  (1 mL) at 0 °C under nitrogen atmosphere. After addition, the reaction was stirred and heated to reflux for 4 h. After the reaction reached completion, the reaction was quenched by adding  $\text{H}_2\text{O}$  (0.1 mL) slowly at 0 °C. After stirring for 10 minutes, a 15% NaOH solution (0.1 mL) was added slowly, followed by  $\text{H}_2\text{O}$  (0.3 mL). The reaction mixture was passed through a Celite pad. The filtrate was dried over  $\text{MgSO}_4$ , concentrated under vacuum, and purified by column chromatography on silica gel (eluent: petroleum ether/ethyl acetate = 5/1) to afford **37** (34.4 mg, 85%, 93% D) as a white solid: 96:4 er (HPLC conditions: Chiralcel OD-H column, hexane/*i*-PrOH = 95/5, 1 mL/min,  $\lambda = 214$  nm,  $t_R$  (major) = 6.8 min,  $t_R$  (minor) = 8.3 min);  $[\alpha]_D^{25} = -17.5$  ( $c = 0.13$ ,  $\text{CHCl}_3$ ); **m.p.** 100-102 °C;  **$^1\text{H}$  NMR** (400 MHz,  $\text{CDCl}_3$ )  $\delta = 7.71$ -7.48 (m, 6 H), 7.46-7.22 (m, 9 H), 3.66 (dd,  $J_1 = 9.2$  Hz,  $J_2 = 4.4$  Hz, 0.06 H), 3.49 (t,  $J = 6.4$  Hz, 2 H), 1.94-1.16 (m, 8 H), 1.01-0.74 (m, 6 H);  **$^{13}\text{C}$  NMR** (100 MHz,  $\text{CDCl}_3$ )  $\delta = 135.7$ , 135.1, 129.4, 127.8, 74.6 (t,  $J_{\text{C-D}} = 20.8$  Hz), 63.3, 38.0, 34.2, 26.8, 22.7, 22.2, 16.1; **HRMS** (ESI) calcd for  $\text{C}_{26}\text{H}_{31}\text{DNaO}_2\text{Si} [\text{M}+\text{Na}^+]$ : 428.2127, found: 428.2122.

To a solution of **37** (40.7 mg, 0.1 mmol) in  $\text{CH}_2\text{Cl}_2$  (1 mL) was added  $\text{Et}_3\text{N}$  (45.0  $\mu\text{L}$ , 0.3 mmol) followed by benzoyl chloride (BzCl) (15.0  $\mu\text{L}$ , 0.11 mmol) at 0 °C, and the mixture was stirred at room temperature for 8 h. When the reaction is complete as monitored by TLC,  $\text{CH}_2\text{Cl}_2$  (10 mL) and  $\text{H}_2\text{O}$  (5 mL) were added, the organic layer was separated and the aqueous layer was extracted with  $\text{CH}_2\text{Cl}_2$  (10 mL  $\times$  3). The combined organic layer was washed with brine and

dried over anhydrous Na<sub>2</sub>SO<sub>4</sub>. After filtration and evaporation, the residue was purified by chromatography on silica gel (eluent: petroleum ether/ethyl acetate = 5/1) to afford the intermediate as a white solid. Then, to a solution of the intermediate (119.5 mg, 0.2 mmol) in dry tetrahydrofuran (1 mL) was added a 1 M solution of tetrabutylammonium fluoride in tetrahydrofuran (1.6 mL, 1.6 mmol). The mixture was stirred at room temperature for 12 h. After the reaction reached completion, potassium bicarbonate (80.3 mg, 0.8 mmol), dry methanol (1 mL), and 30% H<sub>2</sub>O<sub>2</sub> (0.8 mL, 2.0 mmol) were added sequentially, the mixture was further stirred at room temperature for 10 h. When the reaction is complete as monitored by TLC, the mixture was poured into an aqueous solution of sodium bicarbonate and the aqueous layer was extracted with ether (10 mL × 3). The combined organic layer was washed with brine and dried over anhydrous Na<sub>2</sub>SO<sub>4</sub>. After filtration and evaporation, the residue was purified by chromatography on silica gel (eluent: petroleum ether/ethyl acetate = 5/1) to afford **38** (31.1 mg, 51%, 93% D over 3 steps) as a colorless oil: 95:5 er (HPLC conditions: Chiralcel OJ-H column, hexane/*i*-PrOH = 99.8/0.2, 1 mL/min, λ = 214 nm, *t*<sub>R</sub> (major) = 46.6 min, *t*<sub>R</sub> (minor) = 52.8 min); [α]<sub>D</sub><sup>25</sup> = -16.3 (*c* = 0.14, CHCl<sub>3</sub>); <sup>1</sup>H NMR (400 MHz, CDCl<sub>3</sub>) δ = 8.09-7.96 (m, 2 H), 7.59-7.51 (m, 1 H), 7.49-7.38 (m, 2 H), 4.30 (t, *J* = 6.8 Hz, 2 H), 3.58 (q, *J* = 6.4 Hz, 0.07 H), 1.87-1.66 (m, 2 H), 1.60-1.32 (m, 3 H), 1.14 (s, 3 H), 0.96-0.80 (m, 6 H); <sup>13</sup>C NMR (100 MHz, CDCl<sub>3</sub>) δ = 166.7, 132.8, 130.4, 129.5, 128.3, 73.7 (t, *J*<sub>C-D</sub> = 21.4 Hz), 65.8, 37.0, 34.7, 23.4, 22.6, 22.3, 17.6; HRMS (ESI) calcd for C<sub>15</sub>H<sub>21</sub>DNaO<sub>3</sub> [M+Na<sup>+</sup>]: 274.1524, found: 274.1524.

## 6. Mechanistic Studies

### 6.1. Cyclic Voltammetry Measurements

Cyclic voltammetry (CV) experiments of **S1**, **S3**, **S6** were recorded on a CHI 600E electrochemical workstation. Electrolyte solution was prepared by dissolving the substrates (0.05 mmol, 5 mM) and tetraethylammonium hexafluorophosphate (387.4 mg, 1 mmol, 100 mM) in MeCN (10 mL) and bubbling with nitrogen for two minutes. Measurements were performed in a 3-compartment electrochemical cell, in which glassy carbon electrode (GCE) was used as a working electrode, silver-silver chloride (Ag/AgCl) in saturated KCl as the reference electrode, and Pt wire as the counter electrode. The scan rate was set at 100 mV/s.

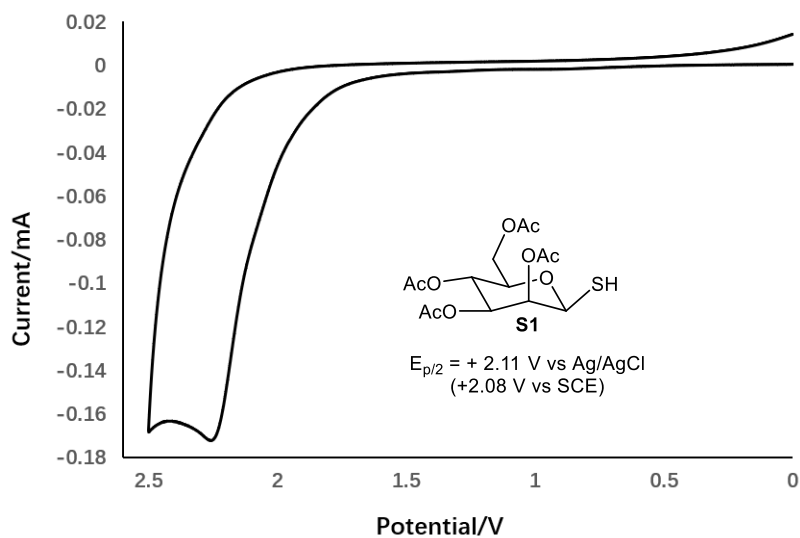

**Figure S2.** CV curve of **S1**.

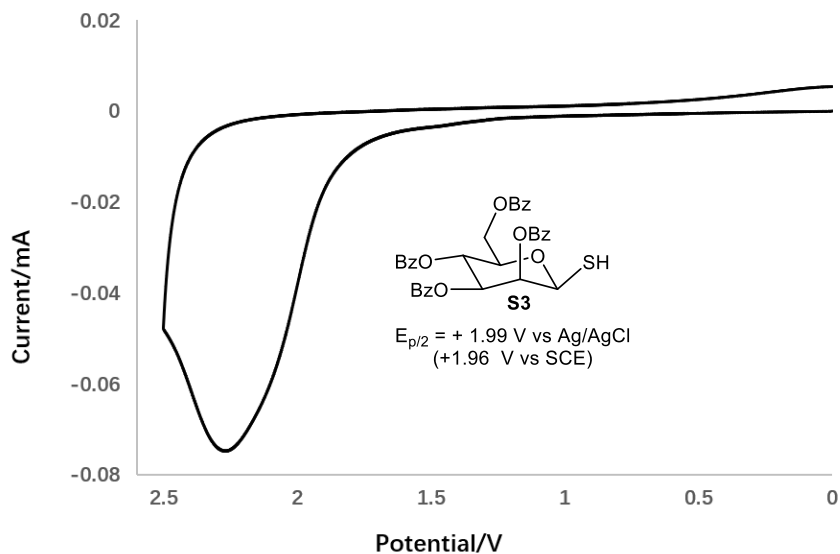

**Figure S3.** CV curve of **S3**.

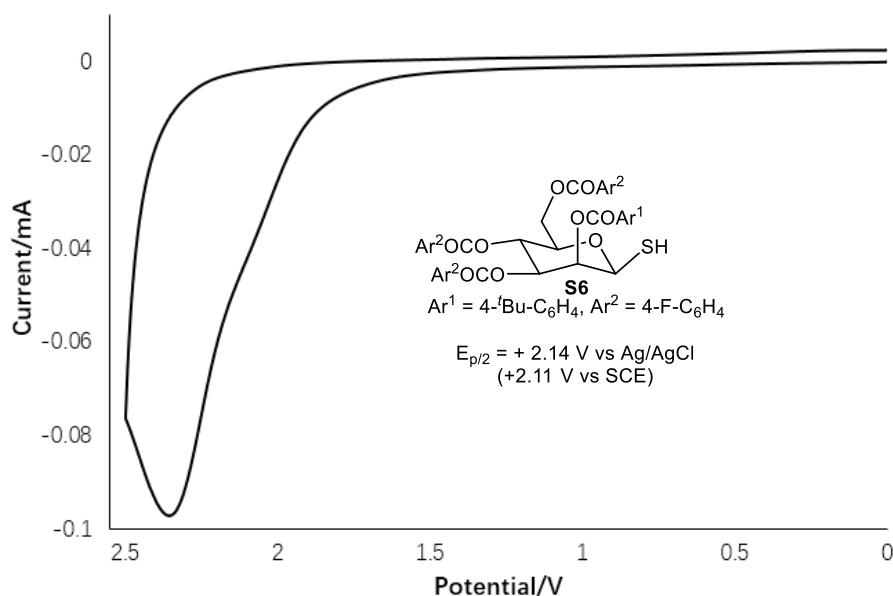

**Figure S4.** CV curve of **S6**.

## 6.2. Stern-Volmer Experiments

Stern-Volmer luminescence quenching experiments were carried out with freshly prepared solutions of 4DPAIPN ( $10^{-5}$  M) at room temperature. For **1a** and **2a**, the solutions were prepared in toluene and was irradiated at 350 nm and the luminescence were measured at 523 nm. For **S6**, the solution was prepared in DMF due to its poor solubility in toluene and was irradiated at 350 nm and the luminescence were measured at 530 nm. For each sample, the luminescence was acquired three times and averaged (**Tables S1-S4**), the averages of the results were used for the graphical representation (**Figures S5-S9**).

**Table S1.** Fluorescence quenching data with solutions of 4DPAIPN and **1a**.

| Species   | Concentration (mM) |  |  |  |  |
|-----------|--------------------|--|--|--|--|
| 4DPAIPN   | 0.01               |  |  |  |  |
| <b>1a</b> | varied             |  |  |  |  |

  

| [Sub] (mM) | Scan 1 | Scan 2 | Scan 3 | Average | I <sub>0</sub> /I |
|------------|--------|--------|--------|---------|-------------------|
| 0          | 1294   | 1295   | 1293   | 1294    | 1.000             |
| 5          | 1302   | 1302   | 1301   | 1302    | 0.994             |
| 10         | 1290   | 1289   | 1290   | 1290    | 1.003             |
| 15         | 1290   | 1290   | 1289   | 1290    | 1.003             |
| 20         | 1338   | 1338   | 1337   | 1338    | 0.967             |
| 25         | 1291   | 1290   | 1289   | 1290    | 1.003             |

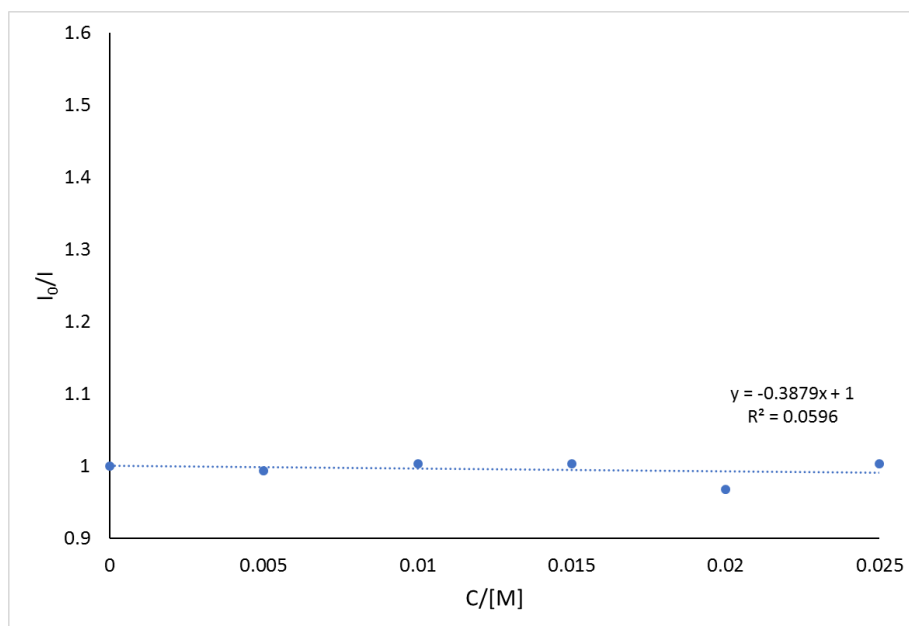

**Figure S5.** Stern-Volmer plot of 4DPAIPN quenching with varying concentration of **1a**.

**Table S2.** Fluorescence quenching data with solutions of 4DPAIPN and **2a**.

| Species   |  | Concentration (mM) |  |  |  |
|-----------|--|--------------------|--|--|--|
| 4DPAIPN   |  | 0.01               |  |  |  |
| <b>2a</b> |  | varied             |  |  |  |

  

| [Sub] (mM) | Scan 1 | Scan 2 | Scan 3 | Average | I <sub>0</sub> /I |
|------------|--------|--------|--------|---------|-------------------|
| 0          | 1270   | 1269   | 1268   | 1269    | 1.000             |
| 5          | 1271   | 1270   | 1270   | 1270    | 0.999             |
| 10         | 1286   | 1286   | 1285   | 1286    | 0.987             |
| 15         | 1269   | 1267   | 1264   | 1267    | 1.002             |
| 20         | 1308   | 1304   | 1298   | 1303    | 0.974             |
| 25         | 1268   | 1267   | 1267   | 1267    | 1.002             |

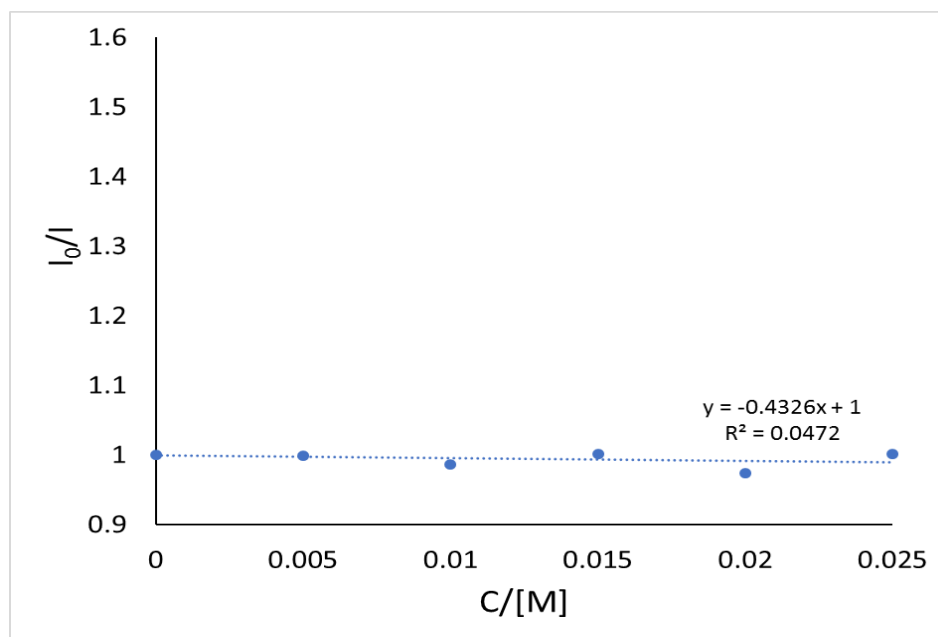

**Figure S6.** Stern-Volmer plot of 4DPAIPN quenching with varying concentration of **2a**.

**Table S3.** Fluorescence quenching data with solutions of 4DPAIPN and **S6**.

| Species   |  | Concentration (mM) |  |  |  |
|-----------|--|--------------------|--|--|--|
| 4DPAIPN   |  | 0.01               |  |  |  |
| <b>S6</b> |  | varied             |  |  |  |

  

| [Sub] (mM) | Scan 1 | Scan 2 | Scan 3 | Average | I <sub>0</sub> /I |
|------------|--------|--------|--------|---------|-------------------|
| 0          | 1034   | 1034   | 1035   | 1034    | 1.000             |
| 1          | 1004   | 1004   | 1004   | 1004    | 1.030             |
| 2          | 990    | 990    | 990    | 990     | 1.044             |
| 3          | 957    | 957    | 957    | 957     | 1.080             |
| 4          | 929    | 929    | 929    | 929     | 1.113             |
| 5          | 901    | 900    | 900    | 900     | 1.149             |

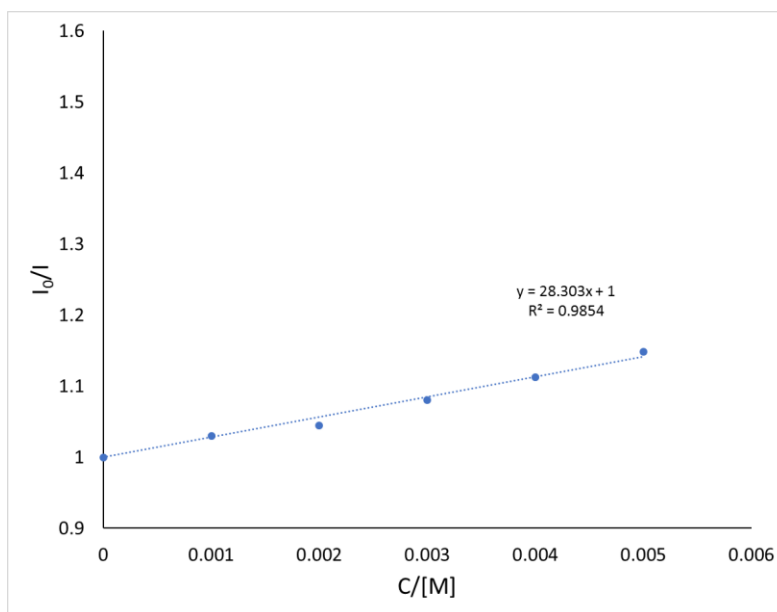

**Figure S7.** Stern-Volmer plot of 4DPAIPN quenching with varying concentration of **S6**.

**Table S4.** Fluorescence quenching data with solutions of 4DPAIPN, and **S6** in the presence of D<sub>2</sub>O (5.0 M).

| Species          |  | Concentration (mM) |  |  |  |
|------------------|--|--------------------|--|--|--|
| 4DPAIPN          |  | 0.01               |  |  |  |
| D <sub>2</sub> O |  | 5000               |  |  |  |
| <b>S6</b>        |  | varied             |  |  |  |

  

| [Sub] (mM) | Scan 1 | Scan 2 | Scan 3 | Average | I <sub>0</sub> /I |
|------------|--------|--------|--------|---------|-------------------|
| 0          | 1043   | 1044   | 1044   | 1044    | 1.000             |
| 1          | 1011   | 1011   | 1011   | 1011    | 1.033             |
| 2          | 964    | 964    | 964    | 964     | 1.083             |
| 3          | 939    | 938    | 938    | 938     | 1.113             |
| 4          | 936    | 936    | 936    | 936     | 1.115             |
| 5          | 928    | 927    | 927    | 927     | 1.126             |

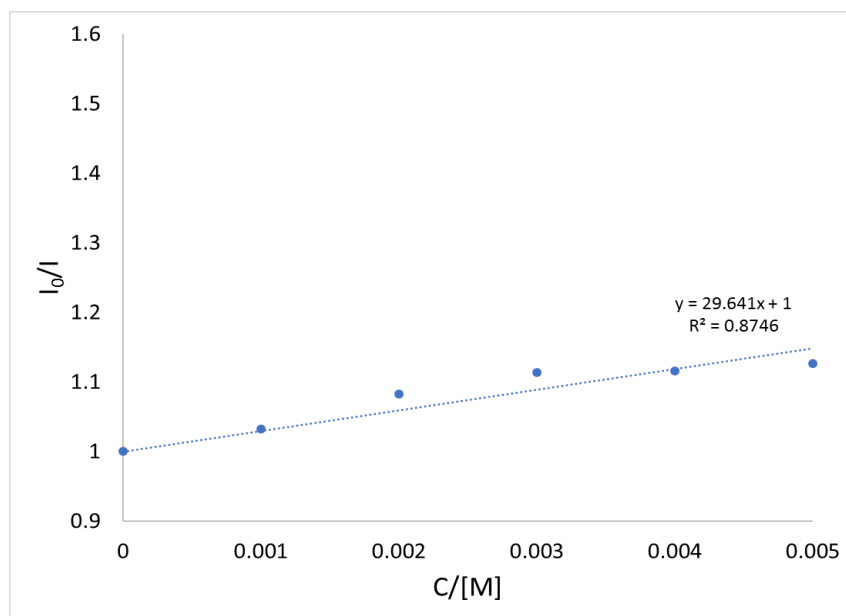

**Figure S8.** Stern-Volmer plot of 4DPAIPN quenching with varying concentration of **S6** in the presence of D<sub>2</sub>O (5.0 M).



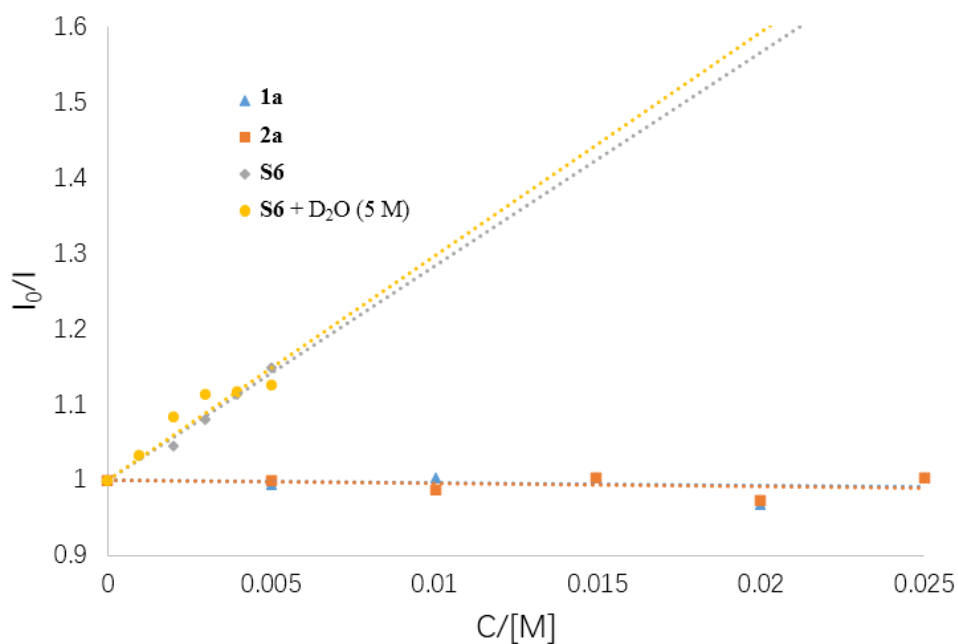

**Figure S9.** Summary of Stern-Volmer plots.

### 6.3. Quantum Yield Measurements

Emission spectra of the blue LED (30 W) was recorded on a Steady-State & Time-Resolved Fluorescence Spectrofluorometer (**Figure S10**). According to the spectra, emission range of light source was 400 – 500 nm, and the maximum emission wavelength was 441 nm.

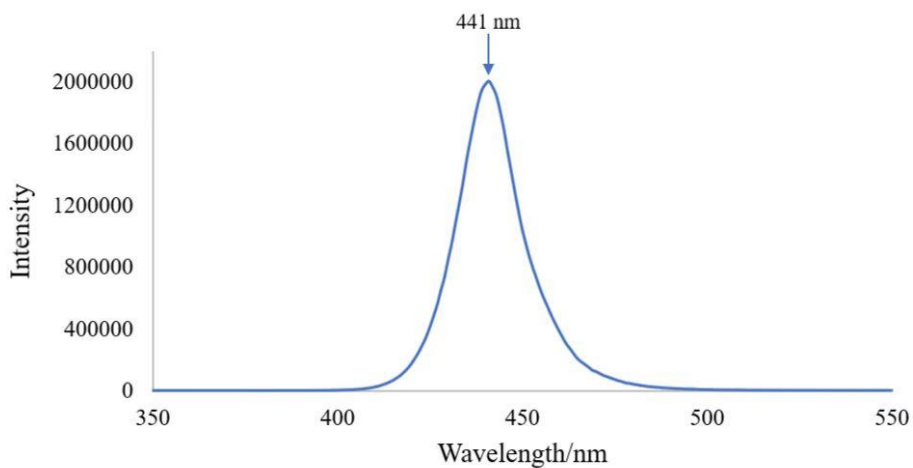

**Figure S10.** Emission spectra of the blue LED

Quantum yield measurements were determined using standard ferrioxalate chemical actinometry as described by Yoon,<sup>8</sup> Ritter,<sup>9</sup> Aleman,<sup>10</sup> and Glorious.<sup>11</sup> In this part, we use a 30 W blue LED ( $\lambda = 441$  nm) as light source to determine the quantum yield.

### 6.3.1. Determination of the photon flux at 441 nm:

The photon flux of the 30 W blue LED (441 nm) was determined by monitoring the photoreduction of Fe(III) in potassium ferrioxalate to Fe(II), upon complexation with 1,10-phenanthroline:

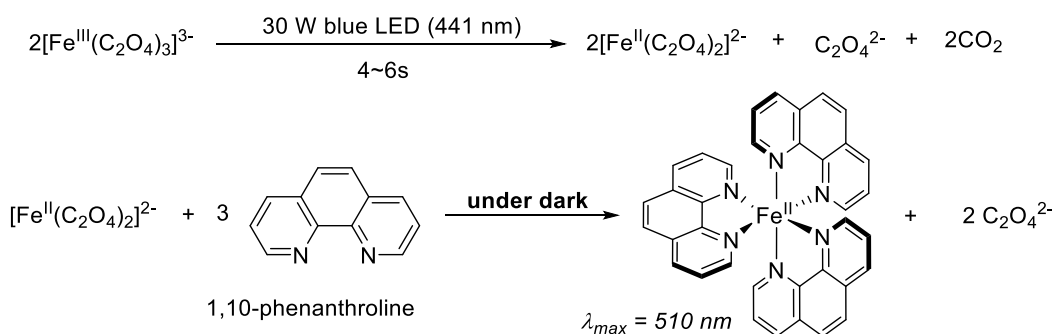

The following solutions were prepared:

a. Actinometer solution: 589.5 mg (1.2 mmol) of potassium ferrioxalate trihydrate and 278  $\mu\text{L}$  of  $\text{H}_2\text{SO}_4$  96% were added to a 100 mL volumetric flask and filled to the mark with Nanopure water.

b. Phenanthroline-buffer solution: 100 mg (0.55 mmol) of 1, 1,10-phenanthroline, 9.88 g (120.4 mmol) of sodium acetate and 2.0 mL of  $\text{H}_2\text{SO}_4$  96% were added to a 100 mL volumetric flask and filled to the mark with Nanopure water.

1 mL of the actinometer solution was added to a vial (16 x 60 mm) and was irradiated by the 30 W blue LED for 4 seconds. After the irradiation, the mixture was quantitatively transferred to a 5 mL volumetric flask containing 1.0 mL of the phenanthroline-buffer solution. Then, the flask was filled to the mark with Nanopure water, wrapped up with aluminum foil, and was left in the dark for 1 h to ensure the quantitative formation of  $\text{Fe}^{\text{II}}(\text{phen})_3^{2+}$  complex. This procedure was repeated one more time by changing the irradiation time to 6 seconds.

Additionally, the experiment of a control sample was carried out under dark, following the same sample treatment.

The absorbance of each solution at 510 nm was measured using a Perkin-Elmer Lambda 35 UV-Vis spectrophotometer, establishing the blank with Nanopure water. For each sample, the absorbance was acquired three times and averaged. According to Lambert-Beer law, the moles of Fe(II) in each sample are related to the absorbance:

$$n [Fe^{2+}] = \frac{V \cdot \Delta A}{l \cdot \varepsilon}$$

Where:

- $\Delta A$  is the absorbance difference between irradiated sample and non-irradiated sample.
- $V$  is the volume (in L) of the measurement sample (5 mL).
- $\varepsilon$  is the extinction coefficient of the complex  $Fe^{II}(phen)_3^{2+}$  at 510 nm ( $11100 \text{ L mol}^{-1} \text{ cm}^{-1}$ )
- $l$  is the optical path of the sample in the spectrophotometer (1 cm).

The photon flux can be calculated using the following equation:

$$photon \ flux = \frac{n [Fe^{2+}]}{\Phi \cdot t \cdot f}$$

Where:

- $\Phi$  is the quantum yield for the photoreduction of ferrioxalate at 441 nm, which is 1.11.<sup>12</sup>
- $t$  is the reaction time (4 s or 6 s).
- $f$  is the fraction of light absorbed, and is calculated as  $f = 1 - 10^{-A_{441 \text{ nm}}}$
- where  $A_{441 \text{ nm}}$  is the absorbance of the actinometer solution at 441 nm (which is 0.3877 according to the UV-Vis spectra of actinometer solution (**Figure S11**)).

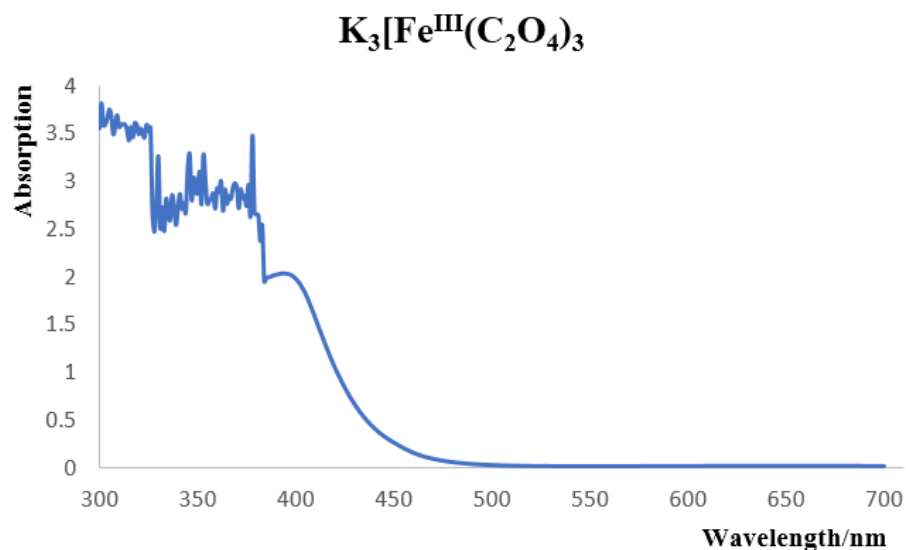

**Figure S11.** UV-Vis spectra of actinometer solution (12 mM in aqueous solution).

The photon flux of the 30 W blue LED (441 nm) was thus determined to be  $2.65 \cdot 10^{-7}$  einsten  $s^{-1}$  (Table S5).

**Table S5.** UV-Vis absorption data and calculated results of photo flux

| scan time                        | UV-Vis absorption at 510 nm     |                       |                   |
|----------------------------------|---------------------------------|-----------------------|-------------------|
|                                  | A <sub>4s</sub>                 | A <sub>6s</sub>       | A <sub>dark</sub> |
| <b>1</b>                         | 1.480                           | 2.195                 | 0.016             |
| <b>2</b>                         | 1.644                           | 2.452                 | 0.019             |
| <b>Average</b>                   | 1.562                           | 2.324                 | 0.018             |
| <b>ΔA (=A-A<sub>dark</sub>)</b>  | 1.545                           | 2.306                 | -                 |
| <b>n [Fe<sup>2+</sup>] (mol)</b> | $6.96 \cdot 10^{-7}$            | $1.04 \cdot 10^{-7}$  |                   |
| <b>Photon flux (einstein/s)</b>  | $2.654 \cdot 10^{-7}$           | $2.642 \cdot 10^{-7}$ |                   |
|                                  | (average) $2.648 \cdot 10^{-7}$ |                       |                   |

### 6.3.2. Determination of quantum yield at 441 nm:

Once we have determined the photon flux of the 30 W blue LED ( $\lambda_{\max} = 441$  nm), the same equation must be employed for the determination of the quantum yield of our photoreaction system. For that, the moles of product for a given time must be determined.

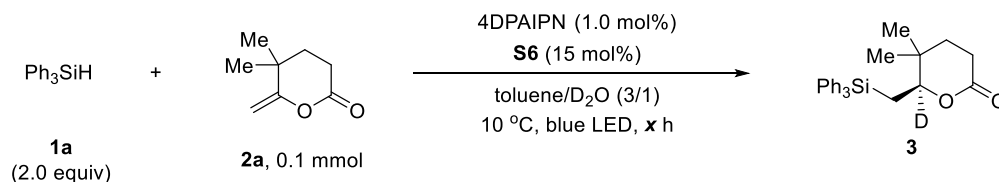

Following the **Typical Procedure**, the reaction of **1a** and **2a** in the presence of 4DPAIPN, **S6**, toluene (0.75 mL) and D<sub>2</sub>O (0.25 mL) was carried out and stopped after 1 h of irradiation. The solvent of reaction mixture was evaporated *in vacuo*. The amount of product **3** was determined to be  $0.17 \cdot 10^{-4}$  mol by <sup>1</sup>H NMR analysis of the crude reaction mixture using CH<sub>2</sub>Br<sub>2</sub> as the internal standard. Another run with an irradiation time of 2 h was also carried out, and the amount of **3** was determined to be  $0.32 \cdot 10^{-4}$  mol.

$$\Phi' = \frac{n [\text{prod.}]}{\text{photon flux} \cdot t' \cdot f'}$$

Where:

- $n$  [prod.] is the amount of **3** (in mol) that has been formed during the irradiation time.
- $t'$  (s) is the irradiation time (in seconds).
- $f'$  is the fraction of light absorbed, and is calculated as  $f' = 1 - 10^{-A_{441 \text{ nm}}}$  where  $A_{441 \text{ nm}}$  is the absorbance of the actinometer solution at 441 nm, and was determined to be 2.5939 according to the UV-Vis spectra of 1 mM solution of **PC** in toluene (**Figure S12**).

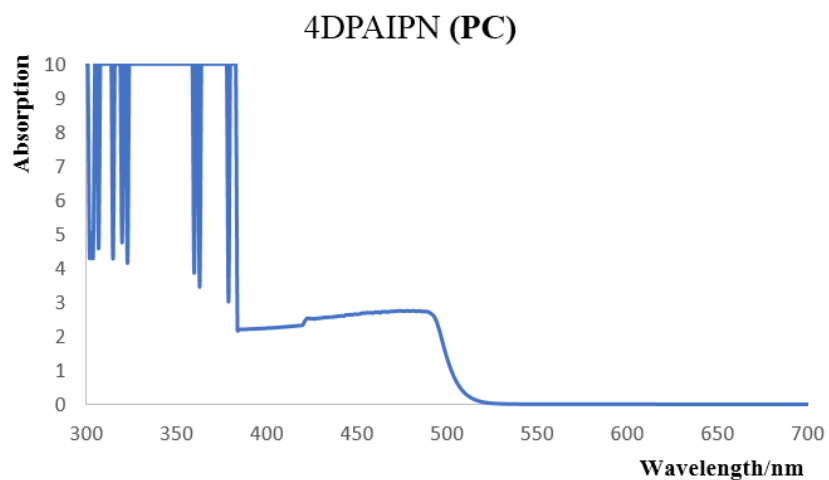

**Figure S12.** UV-Vis spectra of **PC** solution (1 mM in toluene)

The quantum yield of the reaction was thus determined to be 0.018 (average of two runs, **Table S6**).

**Table S6.** Calculations of quantum yield

| entry | reaction time/s | NMR yield/% | n[prod.]/mol         | quantum yield ( $\Phi'$ ) | temp./ $^{\circ}\text{C}$ |
|-------|-----------------|-------------|----------------------|---------------------------|---------------------------|
| 1     | 7200            | 32          | $0.32 \cdot 10^{-4}$ | 0.017                     | 10                        |
| 2     | 3600            | 17          | $0.17 \cdot 10^{-4}$ | 0.018                     | 10                        |

$$\Phi' = (0.017 + 0.018) / 2 = 0.018$$

## 7. X-Ray Crystallographic Data of Compound 6 and 15

### 7.1 X-Ray Crystallographic Data of Compound 6

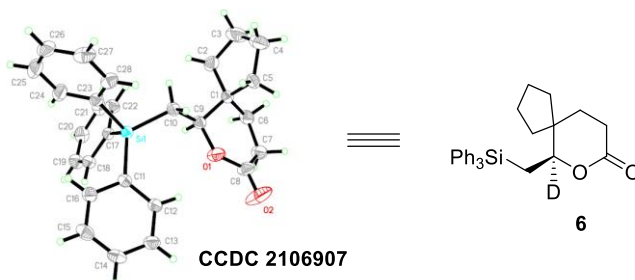

**Figure S13.** X-Ray Structure of Compound **6** (CCDC 2106907). Crystals suitable for X-ray structure analysis were obtained *via* recrystallization from dichloromethane and pentane.

**Table S7.** Crystal data and structure refinement for **6**.

|                                   |                                                                                                                 |
|-----------------------------------|-----------------------------------------------------------------------------------------------------------------|
| Identification code               | <b>6</b>                                                                                                        |
| Empirical formula                 | C <sub>28</sub> H <sub>30</sub> O <sub>2</sub> Si                                                               |
| Formula weight                    | 426.61                                                                                                          |
| Temperature                       | 297(2) K                                                                                                        |
| Wavelength                        | 1.54178 Å                                                                                                       |
| Crystal system, space group       | Orthorhombic, P2(1)2(1)2(1)                                                                                     |
| Unit cell dimensions              | a = 9.6379(4) Å    alpha = 90 deg.<br>b = 11.7392(5) Å    beta = 90 deg.<br>c = 21.0292(8) Å    gamma = 90 deg. |
| Volume                            | 2379.27(17) Å <sup>3</sup>                                                                                      |
| Z, Calculated density             | 4, 1.191 Mg/m <sup>3</sup>                                                                                      |
| Absorption coefficient            | 1.028 mm <sup>-1</sup>                                                                                          |
| F(000)                            | 912                                                                                                             |
| Crystal size                      | 0.200 x 0.180 x 0.160 mm                                                                                        |
| Theta range for data collection   | 4.204 to 68.396 deg.                                                                                            |
| Limiting indices                  | -11 ≤ h ≤ 11, -14 ≤ k ≤ 12, -25 ≤ l ≤ 24                                                                        |
| Reflections collected / unique    | 18832 / 4346 [R(int) = 0.0388]                                                                                  |
| Completeness to theta = 67.679    | 99.8 %                                                                                                          |
| Refinement method                 | Full-matrix least-squares on F <sup>2</sup>                                                                     |
| Data / restraints / parameters    | 4346 / 1 / 280                                                                                                  |
| Goodness-of-fit on F <sup>2</sup> | 1.023                                                                                                           |

|                               |                                     |
|-------------------------------|-------------------------------------|
| Final R indices [I>2sigma(I)] | R1 = 0.0473, wR2 = 0.1221           |
| R indices (all data)          | R1 = 0.0540, wR2 = 0.1302           |
| Absolute structure parameter  | 0.033(14)                           |
| Extinction coefficient        | n/a                                 |
| Largest diff. peak and hole   | 0.200 and -0.230 e. Å <sup>-3</sup> |

## 7.2 X-Ray Crystallographic Data of Compound 15

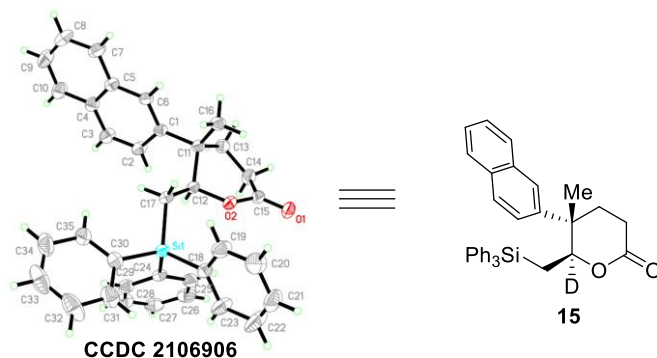

**Figure S14.** X-Ray Structure of Compound **15** (CCDC 2106906). Crystals suitable for X-ray structure analysis were obtained via recrystallization from tetrahydrofuran and pentane.

**Table S8.** Crystal data and structure refinement for **15**

|                                 |                                                                                                                           |
|---------------------------------|---------------------------------------------------------------------------------------------------------------------------|
| Identification code             | <b>15</b>                                                                                                                 |
| Empirical formula               | C <sub>35</sub> H <sub>32</sub> O <sub>2</sub> Si                                                                         |
| Formula weight                  | 512.69                                                                                                                    |
| Temperature                     | 296(2) K                                                                                                                  |
| Wavelength                      | 1.54178 Å                                                                                                                 |
| Crystal system, space group     | Monoclinic, P2(1)                                                                                                         |
| Unit cell dimensions            | a = 10.0090(12) Å    alpha = 90 deg.<br>b = 9.9699(10) Å    beta = 98.738(6) deg.<br>c = 16.3765(18) Å    gamma = 90 deg. |
| Volume                          | 1615.2(3) Å <sup>3</sup>                                                                                                  |
| Z, Calculated density           | 2, 1.054 Mg/m <sup>3</sup>                                                                                                |
| Absorption coefficient          | 0.835 mm <sup>-1</sup>                                                                                                    |
| F(000)                          | 544                                                                                                                       |
| Crystal size                    | 0.220 x 0.200 x 0.180 mm                                                                                                  |
| Theta range for data collection | 6.519 to 66.581 deg.                                                                                                      |



|                                   |                                             |
|-----------------------------------|---------------------------------------------|
| Limiting indices                  | -11<=h<=11, -11<=k<=11, -19<=l<=19          |
| Reflections collected / unique    | 26927 / 5639 [R(int) = 0.0431]              |
| Completeness to theta = 66.581    | 99.0 %                                      |
| Refinement method                 | Full-matrix least-squares on F <sup>2</sup> |
| Data / restraints / parameters    | 5639 / 1 / 344                              |
| Goodness-of-fit on F <sup>2</sup> | 0.977                                       |
| Final R indices [I>2sigma(I)]     | R1 = 0.0392, wR2 = 0.1174                   |
| R indices (all data)              | R1 = 0.0442, wR2 = 0.1233                   |
| Absolute structure parameter      | -0.006(10)                                  |
| Extinction coefficient            | n/a                                         |
| Largest diff. peak and hole       | 0.181 and -0.132 e. A <sup>-3</sup>         |

## 8. Computational Details

### 8.1 General Information

All the DFT calculations were carried out in Gaussian 16 (C.01).<sup>13</sup> Optimizations were performed using the  $\omega$ B97xD functional<sup>14</sup> in combination with the 6-31+G(d,p) basis set. To characterize the nature of the stationary points as transition states (one imaginary frequency) or minima (zero imaginary frequencies), frequency calculations were calculated at the same level of theory. Furthermore, thermochemistry data was generated using the Goodvibes program at 283.15K and 1M concentration, including quasi-harmonic corrections with the method developed by Grimme,<sup>15</sup> and a cut-off value of 100 wavenumbers. In order to refine the potential energies, single point energy calculations were recalculated using the larger basis set (6-311++G(3d,2p)) and PBE0<sup>16</sup> as the functional including Grimme's empirical dispersion (GD3BJ). The  $\omega$ B97xD functional was selected for optimizations due to its general good performance in geometry optimization<sup>17</sup> and to directly compare the result with our previous study on the topic. Finally, implicit solvation was introduced in all the calculations, using the CPCM implicit solvent model<sup>18</sup> and toluene as the solvent.

Finally, CREST(xtb)<sup>19</sup> method was used to explore the conformational space of the key enantioselectivity determining transition states (constraining the reactive internal coordinates). The TSs shown in the manuscript correspond to the most stable transition states found.

NCI analyses were performed using the NCIPLOT<sup>20</sup> program and all the 3D representations were prepared in PyMOL.

## 8.2 Full Free Energy Profile of the Deuteriosilylation of Methylene lactone 2a using Thiol S3

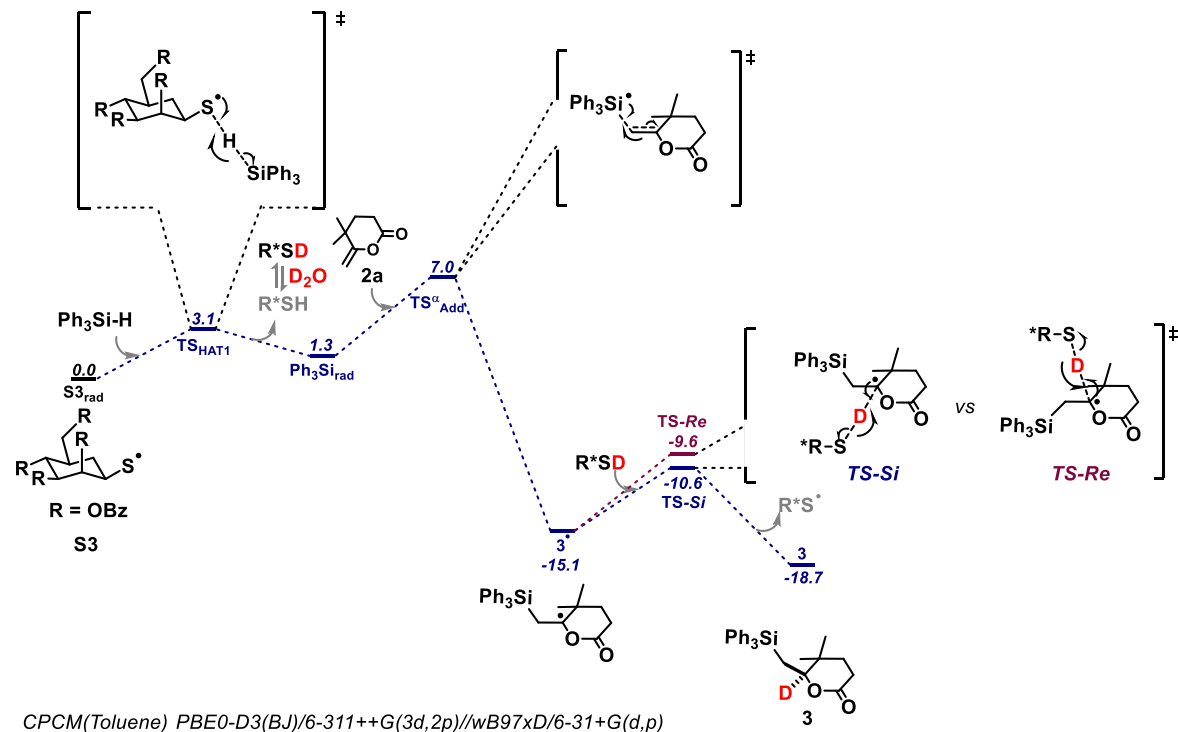

**Figure S15.** Free energy profile of the deuteriosilylation of methylenelactone **2a** using thiol catalyst **S3**. All energies in kcal/mol.

The calculation starts with a polarity matched HAT between the silane and the thiyl radical. The barrier is very low and the resulting silane radical,  $\text{Ph}_3\text{Si}^\cdot$ ; reacts with the methylenelactone at the external position. This addition is also kinetically accessible (7.0 kcal/mol) and thermodynamically very favored (-16.4 kcal/mol). Once the tertiary prochiral radical is formed, the enantioselectivity is determined by the subsequent deuterium atom transfer from the in-situ generated deuterated thiol catalyst *d*-**S3**. This step is determined by the non-covalent interactions of the different benzoyl in the backbone of the thiol catalyst with the substrate, providing a rigid conformation. This approach is able to differentiate both *Si* and *Re* faces, favoring the formation of the product **3** in an enantioselective way.

### 8.3 XYZ Coordinated and Energies of the Calculated Species

Final free energies are calculated as the sum of E (large basis set) +  $G_{\text{Corr}}$ .  $G_{\text{Corr}}^{\text{D}}$  refers to the free energy correction of deuterated species. Energies for distortion/interaction analysis are included in the TS-*Re* and TS-*Si*.

#### S3<sub>rad</sub>

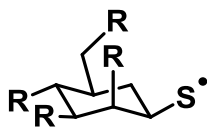

R=OBz

E = -2385.420035

$G_{\text{Corr}}^{\text{D}}$  = 0.490207

|   |             |             |             |
|---|-------------|-------------|-------------|
| S | 1.03650700  | -3.91468900 | -1.71835200 |
| O | 1.70375200  | -1.63385000 | -0.57928400 |
| O | -1.09007600 | -2.28382300 | -0.30190800 |
| O | -3.08227500 | -2.60336600 | -1.31125200 |
| O | -1.92493300 | 0.21051700  | -0.88202200 |
| O | -2.60312200 | 0.53012700  | -3.00580900 |
| O | 0.36058500  | 1.74051300  | -0.28077000 |
| O | -0.44162700 | 1.87811900  | 1.82435300  |
| O | 4.02536200  | -0.19021100 | 0.12033000  |
| O | 4.87849600  | 0.67188600  | 2.00925900  |
| C | 0.90184900  | -2.13305300 | -1.62757500 |
| C | -0.55649100 | -1.68536700 | -1.48173800 |
| C | -0.62242700 | -0.16193200 | -1.31156500 |
| C | 0.34079400  | 0.31596100  | -0.23749000 |
| C | 1.74911900  | -0.21647700 | -0.52382300 |
| C | 2.71848600  | 0.16749900  | 0.57075100  |
| C | -2.41132700 | -2.57672700 | -0.30276300 |
| C | -2.85797100 | 0.47433200  | -1.82243200 |
| C | -0.10332000 | 2.41784800  | 0.79383600  |
| C | 5.03916700  | 0.10796900  | 0.94584400  |
| H | 1.26896100  | -1.75920500 | -2.60025000 |
| H | -1.13656400 | -1.99444000 | -2.35310000 |
| H | -0.39423800 | 0.31930200  | -2.26799100 |
| H | 0.00519000  | -0.01973500 | 0.74694800  |
| H | 2.10761000  | 0.18804600  | -1.48371100 |
| H | 2.48436000  | -0.36742700 | 1.49566800  |
| H | 2.67709900  | 1.24281000  | 0.76083800  |
| C | -2.92920100 | -2.83342600 | 1.06433700  |
| C | -2.11310000 | -2.72539000 | 2.19473100  |
| C | -4.28605500 | -3.14011700 | 1.20281300  |
| C | -2.65648600 | -2.93077500 | 3.45898300  |
| H | -1.06379500 | -2.47833700 | 2.08223500  |
| C | -4.82429300 | -3.34296500 | 2.46825800  |
| H | -4.90572400 | -3.20639100 | 0.31506700  |
| C | -4.00963800 | -3.23870200 | 3.59616600  |
| H | -2.02506000 | -2.84635400 | 4.33716900  |
| H | -5.87780200 | -3.57892200 | 2.57635000  |
| H | -4.43087900 | -3.39523300 | 4.58427800  |
| C | -4.20082500 | 0.67407900  | -1.22070500 |
| C | -5.25834300 | 1.01940200  | -2.06616300 |
| C | -4.42523800 | 0.49282800  | 0.14799000  |
| C | -6.53632000 | 1.18631800  | -1.54434600 |
| H | -5.06752700 | 1.14893200  | -3.12609700 |
| C | -5.70636300 | 0.65652500  | 0.66432200  |
| H | -3.60504000 | 0.21898500  | 0.80168500  |

|   |             |             |             |
|---|-------------|-------------|-------------|
| C | -6.76074900 | 1.00352900  | -0.17960900 |
| H | -7.35759800 | 1.45479400  | -2.20056300 |
| H | -5.88103600 | 0.50972600  | 1.72506700  |
| H | -7.75958300 | 1.13002600  | 0.22623800  |
| C | -0.13300300 | 3.88489900  | 0.55810800  |
| C | -0.52051700 | 4.70992700  | 1.61802200  |
| C | 0.20479100  | 4.44354200  | -0.67866400 |
| C | -0.56830800 | 6.08824200  | 1.44253000  |
| H | -0.78062500 | 4.25987200  | 2.57000900  |
| C | 0.15381500  | 5.82336000  | -0.84977600 |
| H | 0.50102500  | 3.80079200  | -1.49937300 |
| C | -0.23127000 | 6.64521200  | 0.20884900  |
| H | -0.86800400 | 6.72794600  | 2.26596400  |
| H | 0.41361700  | 6.25738900  | -1.80960900 |
| H | -0.26958700 | 7.72131300  | 0.07201000  |
| C | 6.35876000  | -0.32576300 | 0.40966400  |
| C | 7.50308800  | -0.01863300 | 1.15083100  |
| C | 6.47191500  | -1.02481200 | -0.79614200 |
| C | 8.75567200  | -0.40621800 | 0.68717500  |
| H | 7.39739600  | 0.52226100  | 2.08513300  |
| C | 7.72707300  | -1.41227600 | -1.25535900 |
| H | 5.58136700  | -1.26572400 | -1.36510900 |
| C | 8.86819900  | -1.10302800 | -0.51587600 |
| H | 9.64336800  | -0.16619200 | 1.26310000  |
| H | 7.81482500  | -1.95687700 | -2.18974700 |
| H | 9.84592100  | -1.40650100 | -0.87685200 |

#### S3

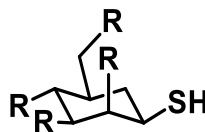

R=OBz

E = -2386.064066

$G_{\text{Corr}}^{\text{D}}$  = 0.499986

$G_{\text{Corr}}^{\text{D}}$  = 0.497274

|   |             |             |             |
|---|-------------|-------------|-------------|
| S | 0.99964000  | -3.91523000 | -1.66113400 |
| O | 1.69771300  | -1.61409200 | -0.57757200 |
| O | -1.09339800 | -2.26641500 | -0.29509300 |
| O | -3.08474400 | -2.59784100 | -1.30220100 |
| O | -1.93245100 | 0.22539800  | -0.87881000 |
| O | -2.61214300 | 0.53803200  | -3.00312900 |
| O | 0.35081700  | 1.75821100  | -0.27961100 |
| O | -0.43291500 | 1.89967200  | 1.83216800  |
| O | 4.01873800  | -0.16683200 | 0.12697400  |
| O | 4.86689500  | 0.66465400  | 2.03188600  |
| C | 0.89483800  | -2.10483100 | -1.63117400 |
| C | -0.56097300 | -1.67062400 | -1.47566900 |
| C | -0.62945300 | -0.14702100 | -1.30799800 |
| C | 0.33319700  | 0.33332000  | -0.23399000 |
| C | 1.74294900  | -0.19732500 | -0.51861900 |
| C | 2.71006000  | 0.18475800  | 0.57859700  |

|   |             |             |             |
|---|-------------|-------------|-------------|
| C | -2.41116300 | -2.56897500 | -0.29514800 |
| C | -2.86617600 | 0.48357300  | -1.81938300 |
| C | -0.10530400 | 2.43706900  | 0.79693000  |
| C | 5.03016300  | 0.11907800  | 0.95940400  |
| H | 2.21355200  | -3.95925300 | -2.23024800 |
| H | 1.25967500  | -1.71546700 | -2.59171700 |
| H | -1.14489000 | -1.97989400 | -2.34506500 |
| H | -0.40161400 | 0.33406400  | -2.26446800 |
| H | -0.00241300 | -0.00135300 | 0.75074700  |
| H | 2.10210500  | 0.21069900  | -1.47684800 |
| H | 2.47715400  | -0.35523200 | 1.50076500  |
| H | 2.66609100  | 1.25907200  | 0.77378900  |
| C | -2.92509800 | -2.83274700 | 1.07246800  |
| C | -2.10321900 | -2.73978400 | 2.19994400  |
| C | -4.28312600 | -3.13223400 | 1.21450500  |
| C | -2.64219000 | -2.95278900 | 3.46485100  |
| H | -1.05268000 | -2.49957800 | 2.08428000  |
| C | -4.81707600 | -3.34227800 | 2.48065100  |
| H | -4.90702000 | -3.18735800 | 0.32894500  |
| C | -3.99671700 | -3.25297000 | 3.60569000  |
| H | -2.00611000 | -2.88063400 | 4.34078700  |
| H | -5.87161700 | -3.57237500 | 2.59149600  |
| H | -4.41448800 | -3.41535300 | 4.59434700  |
| C | -4.20994200 | 0.68002400  | -1.21815300 |
| C | -5.26702900 | 1.02782900  | -2.06308100 |
| C | -4.43539600 | 0.49320300  | 0.14957300  |
| C | -6.54556900 | 1.19185400  | -1.54166700 |
| H | -5.07542900 | 1.16152100  | -3.12236100 |
| C | -5.71707700 | 0.65384300  | 0.66552400  |
| H | -3.61553500 | 0.21697300  | 0.80268500  |
| C | -6.77101500 | 1.00354600  | -0.17784800 |
| H | -7.36649600 | 1.46235700  | -2.19750700 |
| H | -5.89252700 | 0.50242600  | 1.72549800  |
| H | -7.77028500 | 1.12770900  | 0.22766600  |
| C | -0.14120200 | 3.90353400  | 0.55744300  |
| C | -0.51754600 | 4.73075500  | 1.61964600  |
| C | 0.17973300  | 4.45937100  | -0.68505500 |
| C | -0.57088500 | 6.10845200  | 1.44077300  |
| H | -0.76474500 | 4.28282100  | 2.57606500  |
| C | 0.12310500  | 5.83855900  | -0.85959500 |
| H | 0.46708100  | 3.81487700  | -1.50755500 |
| C | -0.25071400 | 6.66261800  | 0.20135200  |
| H | -0.86188700 | 6.74983500  | 2.26602500  |
| H | 0.36957000  | 6.27036100  | -1.82394400 |
| H | -0.29349200 | 7.73821300  | 0.06183200  |
| C | 6.35178800  | -0.30349200 | 0.41871200  |
| C | 7.49290500  | -0.01836900 | 1.17339600  |
| C | 6.47005300  | -0.97011100 | -0.80483500 |
| C | 8.74716500  | -0.39607400 | 0.70601200  |
| H | 7.38338700  | 0.49786700  | 2.12110700  |
| C | 7.72682000  | -1.34736400 | -1.26811300 |
| H | 5.58194700  | -1.19255000 | -1.38505600 |
| C | 8.86470300  | -1.06057800 | -0.51467000 |
| H | 9.63229300  | -0.17326300 | 1.29269500  |
| H | 7.81864200  | -1.86601300 | -2.21679800 |
| H | 9.84373600  | -1.35600200 | -0.87874500 |

### Ph<sub>3</sub>Si-H

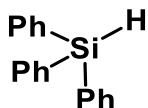

E = -984.3475484

G<sub>Corr</sub> = 0.243652

G<sup>D</sup><sub>Corr</sub> = 0.241107

|    |             |             |             |
|----|-------------|-------------|-------------|
| Si | 0.00017300  | 0.00107100  | -0.98087200 |
| H  | -0.00259600 | 0.00089500  | -2.46984600 |
| C  | -1.72588800 | 0.42057400  | -0.36640500 |
| C  | -1.93127100 | 1.30740100  | 0.70005600  |
| C  | -2.85077500 | -0.18769500 | -0.94528700 |
| C  | -3.21468300 | 1.57532000  | 1.17624600  |
| H  | -1.08036200 | 1.79877600  | 1.16563200  |
| C  | -4.13499600 | 0.07615600  | -0.47463900 |
| H  | -2.72600300 | -0.87980300 | -1.77529400 |
| C  | -4.31815500 | 0.95951300  | 0.58931000  |
| H  | -3.35235700 | 2.26517500  | 2.00345200  |
| H  | -4.99167000 | -0.40452000 | -0.93723600 |
| H  | -5.31821900 | 1.16776200  | 0.95753700  |
| C  | 1.22752400  | 1.28601400  | -0.36849000 |
| C  | 2.12809600  | 1.00695000  | 0.66914700  |
| C  | 1.23525900  | 2.57696600  | -0.92029600 |
| C  | 3.00482300  | 1.98284800  | 1.14330800  |
| H  | 2.14891300  | 0.01522100  | 1.11414200  |
| C  | 2.10861600  | 3.55579200  | -0.45134200 |
| H  | 0.54843500  | 2.82635900  | -1.72636300 |
| C  | 2.99555400  | 3.25864900  | 0.58358900  |
| H  | 3.69418400  | 1.74652500  | 1.94820300  |
| H  | 2.09869300  | 4.54806100  | -0.89192100 |
| H  | 3.67768800  | 4.01942400  | 0.95086100  |
| C  | 0.49901100  | -1.70440500 | -0.36856000 |
| C  | 1.60228000  | -2.36551900 | -0.93115700 |
| C  | -0.18274000 | -2.33576800 | 0.68129300  |
| C  | 2.01220900  | -3.61121300 | -0.46146000 |
| H  | 2.15317300  | -1.90307600 | -1.74735300 |
| C  | 0.22349400  | -3.58232900 | 1.15695600  |
| H  | -1.04421500 | -1.85118600 | 1.13473100  |
| C  | 1.32222400  | -4.22128800 | 0.58632900  |
| H  | 2.86749000  | -4.10623900 | -0.91150100 |
| H  | -0.31845800 | -4.05379000 | 1.97130300  |
| H  | 1.63940300  | -5.19237900 | 0.95427100  |

### Ph<sub>3</sub>Si<sup>rad</sup>

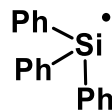

E = -983.7035102

G<sub>Corr</sub> = 0.236084

|    |             |             |             |
|----|-------------|-------------|-------------|
| C  | 0.42437700  | -0.62796700 | 1.25113200  |
| Si | 0.00116200  | -0.00037900 | -0.98190000 |
| H  | -0.00126700 | 0.00071400  | -2.47063800 |
| C  | -1.40056700 | 1.09089000  | -0.36783100 |
| C  | -1.22537300 | 1.97652000  | 0.70478500  |
| C  | -2.67431800 | 1.00412400  | -0.95119600 |
| C  | -2.28555800 | 2.74665900  | 1.18272800  |
| H  | -0.24873600 | 2.07031900  | 1.17365700  |
| C  | -3.73712100 | 1.77079200  | -0.47848400 |
| H  | -2.84357000 | 0.32773300  | -1.78614500 |
| C  | -3.54312300 | 2.64407800  | 0.59171500  |
| H  | -2.12870200 | 3.42693000  | 2.01434700  |
| H  | -4.71456400 | 1.68917000  | -0.94429100 |

|   |             |             |             |
|---|-------------|-------------|-------------|
| H | -4.36917900 | 3.24398100  | 0.96140300  |
| C | 1.64690100  | 0.66936800  | -0.36905300 |
| C | 2.34876600  | 0.05283300  | 0.67630400  |
| C | 2.18635800  | 1.83903400  | -0.92715800 |
| C | 3.54654400  | 0.58675900  | 1.15187100  |
| H | 1.95836900  | -0.85694100 | 1.12591200  |
| C | 3.38216600  | 2.37685600  | -0.45692700 |
| H | 1.66662900  | 2.34158100  | -1.73998200 |
| C | 4.06441500  | 1.74979700  | 0.58579100  |
| H | 4.07459100  | 0.09410400  | 1.96270700  |
| H | 3.78278000  | 3.28211900  | -0.90301700 |
| H | 4.99708900  | 2.16640500  | 0.95388200  |
| C | -0.24221000 | -1.76021600 | -0.36770200 |
| C | 0.50119700  | -2.81347000 | -0.92305000 |
| C | -1.13224600 | -2.05859600 | 0.67343000  |
| C | 0.36380500  | -4.11800200 | -0.45454500 |
| H | 1.20012800  | -2.61534300 | -1.73274500 |
| C | -1.27419700 | -3.36292600 | 1.14706000  |
| H | -1.72542500 | -1.26498900 | 1.12105000  |
| C | -0.52641700 | -4.39423000 | 0.58328400  |
| H | 0.94761500  | -4.91832100 | -0.89899000 |
| H | -1.96944300 | -3.57326700 | 1.95408300  |
| H | -0.63672000 | -5.41049200 | 0.94922900  |

### TS<sub>HATI</sub>

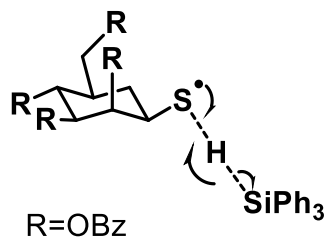

E = -3369.786817

G<sub>Corr</sub><sup>D</sup> = 0.758024

G<sub>Corr</sub><sup>D</sup> = 0.756619

|    |            |             |             |
|----|------------|-------------|-------------|
| Si | 3.92402900 | -1.65073600 | -0.51905100 |
| C  | 5.05171600 | -3.11337700 | -0.78223400 |
| C  | 6.17816400 | -3.33499800 | 0.02639900  |
| C  | 4.74817500 | -4.06572800 | -1.77139800 |
| C  | 6.98667100 | -4.45400700 | -0.16345100 |
| H  | 6.42828200 | -2.62940300 | 0.81406400  |
| C  | 5.55452600 | -5.18416700 | -1.96282400 |
| H  | 3.86517000 | -3.94145500 | -2.39402300 |
| C  | 6.67856200 | -5.37800000 | -1.16026400 |
| H  | 7.85566300 | -4.60542700 | 0.46943600  |
| H  | 5.30276400 | -5.90724200 | -2.73237600 |
| H  | 7.30752900 | -6.25063500 | -1.30675700 |
| C  | 4.39993500 | -0.55454700 | 0.92054000  |
| C  | 5.65331700 | 0.07895200  | 0.95007800  |
| C  | 3.52144400 | -0.34275000 | 1.99360800  |
| C  | 6.02415400 | 0.88348900  | 2.02382000  |
| H  | 6.34904300 | -0.04871700 | 0.12360400  |
| C  | 3.89000400 | 0.46503100  | 3.06794900  |
| H  | 2.53562800 | -0.79912100 | 1.98662000  |
| C  | 5.14265700 | 1.07365600  | 3.08610500  |
| H  | 6.99257300 | 1.37374200  | 2.02458000  |
| H  | 3.19455200 | 0.62604500  | 3.88588300  |
| H  | 5.42570800 | 1.70963400  | 3.91904500  |
| C  | 3.55666700 | -0.67490800 | -2.06884200 |

|   |             |             |             |
|---|-------------|-------------|-------------|
| C | 2.73802900  | 0.45894300  | -1.93702000 |
| C | 4.01227400  | -1.01682900 | -3.35067800 |
| C | 2.38219400  | 1.22531800  | -3.04234000 |
| H | 2.38657500  | 0.74683600  | -0.94920200 |
| C | 3.65887800  | -0.25074600 | -4.46079600 |
| H | 4.65781100  | -1.87967400 | -3.48826800 |
| C | 2.84121300  | 0.86825000  | -4.31044300 |
| H | 1.75305300  | 2.10199500  | -2.91514700 |
| H | 4.02485600  | -0.52704900 | -5.44486800 |
| H | 2.56612400  | 1.46174800  | -5.17671600 |
| S | 0.87069800  | -2.87201300 | 0.29266100  |
| O | 0.37871000  | -0.28998900 | 0.53045000  |
| O | -1.95568800 | -2.00148600 | 0.76215800  |
| O | -3.34799700 | -3.45144000 | -0.26155900 |
| O | -3.51084700 | -0.41022200 | -0.74720600 |
| O | -3.70674200 | -0.99801400 | -2.91264600 |
| O | -2.22526300 | 2.06553600  | -0.44511000 |
| O | -3.51021500 | 2.37037200  | 1.38526300  |
| O | 1.63520000  | 2.37109600  | 0.77081000  |
| O | 1.77892200  | 3.46135300  | 2.72739100  |
| C | 0.08884000  | -1.36917200 | -0.34383000 |
| C | -1.41662700 | -1.58565600 | -0.49152000 |
| C | -2.10119700 | -0.26782900 | -0.87023000 |
| C | -1.69392400 | 0.84883600  | 0.07605600  |
| C | -0.16604600 | 0.95452700  | 0.11878600  |
| C | 0.29517600  | 1.99970200  | 1.11111400  |
| C | -3.00333300 | -2.85146800 | 0.73400500  |
| C | -4.20533100 | -0.84794800 | -1.81812600 |
| C | -3.17087900 | 2.71019200  | 0.27280300  |
| C | 2.27840600  | 3.13462300  | 1.66937200  |
| H | 2.25253200  | -2.39794100 | -0.05671200 |
| H | 0.49538700  | -1.14795100 | -1.34185900 |
| H | -1.61340200 | -2.34522200 | -1.25079600 |
| H | -1.84234400 | -0.00425300 | -1.90041600 |
| H | -2.09389200 | 0.66738600  | 1.07651400  |
| H | 0.19427000  | 1.21778000  | -0.88793500 |
| H | 0.26367000  | 1.59259900  | 2.12452300  |
| H | -0.33851500 | 2.88900100  | 1.06469100  |
| C | -3.68767300 | -2.93953800 | 2.04950900  |
| C | -3.26294000 | -2.19335300 | 3.15301700  |
| C | -4.81346300 | -3.76203000 | 2.14796800  |
| C | -3.96319800 | -2.27708600 | 4.35242300  |
| H | -2.39304700 | -1.55234800 | 3.06806000  |
| C | -5.51088800 | -3.84080900 | 3.34797400  |
| H | -5.13390500 | -4.32397400 | 1.27727600  |
| C | -5.08558000 | -3.09890200 | 4.45035400  |
| H | -3.63516700 | -1.69838600 | 5.20955100  |
| H | -6.38618900 | -4.47755300 | 3.42394500  |
| H | -5.63124000 | -3.15956700 | 5.38682700  |
| C | -5.62592200 | -1.11723900 | -1.47728800 |
| C | -6.49086600 | -1.49952100 | -2.50578900 |
| C | -6.09352500 | -1.02829800 | -0.16208400 |
| C | -7.82088700 | -1.78832000 | -2.22116800 |
| H | -6.10909100 | -1.57069700 | -3.51862800 |
| C | -7.42356000 | -1.32327200 | 0.11837300  |
| H | -5.41899900 | -0.73856900 | 0.63557000  |
| C | -8.28700700 | -1.70169300 | -0.90910300 |
| H | -8.49283100 | -2.08468100 | -3.01987600 |
| H | -7.78395700 | -1.26089900 | 1.13991200  |
| H | -9.32440800 | -1.93177600 | -0.68708100 |
| C | -3.72459000 | 3.88009500  | -0.45873700 |
| C | -4.65067000 | 4.68918200  | 0.20582500  |
| C | -3.35234600 | 4.17476200  | -1.77412900 |
| C | -5.20061200 | 5.78997200  | -0.44133000 |
| H | -4.92995400 | 4.44484100  | 1.22499500  |

|   |             |            |             |
|---|-------------|------------|-------------|
| C | -3.90708300 | 5.27622800 | -2.41828600 |
| H | -2.63792100 | 3.54208400 | -2.28780000 |
| C | -4.82925200 | 6.08365400 | -1.75340500 |
| H | -5.91858200 | 6.41801100 | 0.07560600  |
| H | -3.62112400 | 5.50364100 | -3.43991000 |
| H | -5.26015700 | 6.94217300 | -2.25886900 |
| C | 3.64124900  | 3.53718100 | 1.22801000  |
| C | 4.42195000  | 4.28192600 | 2.11658800  |
| C | 4.15117200  | 3.19089000 | -0.02428200 |
| C | 5.70729600  | 4.66895600 | 1.75714200  |
| H | 4.01262800  | 4.54242700 | 3.08673100  |
| C | 5.43825300  | 3.57993800 | -0.38220300 |
| H | 3.54997400  | 2.61509600 | -0.71530000 |
| C | 6.21773300  | 4.31615100 | 0.50724000  |
| H | 6.31261000  | 5.24390900 | 2.45050300  |
| H | 5.83169400  | 3.30236200 | -1.35480200 |
| H | 7.22286500  | 4.61651900 | 0.22758900  |

### TS<sup>a</sup><sub>Add</sub>

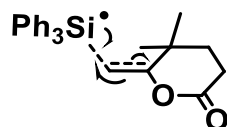

E = -1445.871488

G<sub>Corr</sub> = 0.416484

|    |             |             |             |
|----|-------------|-------------|-------------|
| C  | -3.37911100 | -1.28373700 | -0.09760700 |
| C  | -4.07458400 | 0.00226800  | 0.32944500  |
| C  | -2.82367700 | -1.19328900 | -1.53009400 |
| H  | -5.06169900 | 0.09464700  | -0.13941700 |
| H  | -4.23956800 | 0.03403000  | 1.40834100  |
| H  | -2.55528900 | -1.49913100 | 0.58756400  |
| H  | -4.08189700 | -2.12089800 | -0.03114000 |
| O  | -2.40733600 | 1.20329300  | -1.02609900 |
| C  | -3.33168900 | 1.26044900  | -0.03749100 |
| O  | -3.54240300 | 2.33853500  | 0.46793100  |
| C  | -1.93648200 | 0.02565400  | -1.60831900 |
| C  | -2.03428200 | -2.47014300 | -1.83673500 |
| H  | -2.68674700 | -3.33874700 | -1.70294000 |
| H  | -1.67101900 | -2.48534700 | -2.86853700 |
| H  | -1.17914300 | -2.57816900 | -1.16273300 |
| C  | -3.96919400 | -1.04445200 | -2.55485300 |
| H  | -3.56900600 | -1.05208700 | -3.57273700 |
| H  | -4.67218300 | -1.87835200 | -2.45213200 |
| H  | -4.52717900 | -0.11241000 | -2.42626200 |
| C  | -0.71338200 | 0.13333900  | -2.17289700 |
| H  | -0.30384200 | -0.69005000 | -2.74290500 |
| H  | -0.27506800 | 1.11462600  | -2.31641800 |
| Si | 1.09842900  | -0.01760100 | -0.13317400 |
| C  | 1.50305100  | 1.80937700  | 0.00529400  |
| C  | 2.67953300  | -1.02277000 | -0.29246700 |
| C  | 0.02548200  | -0.62983100 | 1.27580500  |
| C  | 2.83204300  | 2.24197700  | 0.15393100  |
| C  | 0.49760900  | 2.79068400  | -0.06474300 |
| C  | 3.22752300  | -1.76064100 | 0.76979800  |
| C  | 3.37181600  | -1.02308100 | -1.51537000 |
| C  | -0.09211400 | -2.00736700 | 1.53540600  |
| C  | -0.75508200 | 0.24676700  | 2.04846400  |
| C  | 3.14320000  | 3.59729100  | 0.24542400  |
| H  | 3.63551900  | 1.51161200  | 0.20338700  |
| C  | 0.80562800  | 4.14570100  | 0.03385300  |

|   |             |             |             |
|---|-------------|-------------|-------------|
| H | -0.54069600 | 2.50164100  | -0.20701600 |
| C | 4.41819300  | -2.46911800 | 0.61647400  |
| H | 2.72640400  | -1.77657300 | 1.73398900  |
| C | 4.56474100  | -1.72516200 | -1.67233800 |
| H | 2.97554300  | -0.46193200 | -2.35905500 |
| C | -0.93780600 | -2.48730500 | 2.53233500  |
| H | 0.48569200  | -2.71966800 | 0.95106700  |
| C | -1.61169500 | -0.22980900 | 3.03916500  |
| H | -0.69219000 | 1.31899600  | 1.88470200  |
| C | 2.12990900  | 4.55298600  | 0.18922600  |
| H | 4.17755200  | 3.90646700  | 0.36331200  |
| H | 0.00971700  | 4.88253100  | -0.01686800 |
| C | 5.08929900  | -2.45345600 | -0.60527800 |
| H | 4.82451500  | -3.02937000 | 1.45331500  |
| H | 5.08268600  | -1.70699400 | -2.62652800 |
| C | -1.70430600 | -1.59844700 | 3.28640100  |
| H | -1.00430200 | -3.55545600 | 2.71602800  |
| H | -2.20440600 | 0.47127000  | 3.61919200  |
| H | 2.37108500  | 5.60913400  | 0.26188400  |
| H | 6.01689000  | -3.00483000 | -0.72505700 |
| H | -2.36919500 | -1.97044900 | 4.05976200  |

### 3<sub>rad</sub>

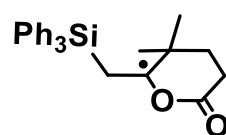

E = -1445.906253

G<sub>Corr</sub> = 0.416017

|    |             |             |             |
|----|-------------|-------------|-------------|
| C  | 3.82067300  | 1.06410100  | -0.18153200 |
| C  | 4.49393600  | -0.27420100 | -0.46430800 |
| C  | 2.66670000  | 1.35140700  | -1.15948300 |
| H  | 5.13986300  | -0.20758400 | -1.34787600 |
| H  | 5.13699100  | -0.59043700 | 0.35973700  |
| H  | 3.42296400  | 1.06645900  | 0.83993100  |
| H  | 4.56217400  | 1.86827600  | -0.23612000 |
| O  | 2.28113400  | -1.10989500 | -1.12589400 |
| C  | 3.53987400  | -1.40984000 | -0.74331000 |
| O  | 3.85862400  | -2.57691000 | -0.69210600 |
| C  | 1.73547300  | 0.17160500  | -1.11622900 |
| C  | 1.94720800  | 2.62866500  | -0.70615600 |
| H  | 2.65834100  | 3.46119800  | -0.68996700 |
| H  | 1.13242000  | 2.90136600  | -1.38260800 |
| H  | 1.52409300  | 2.51683400  | 0.29694900  |
| C  | 3.19994500  | 1.55530800  | -2.59727100 |
| H  | 2.37688000  | 1.80377000  | -3.27451200 |
| H  | 3.92323000  | 2.37832100  | -2.62196900 |
| H  | 3.68979200  | 0.65803700  | -2.98711000 |
| C  | 0.31876800  | 0.14123500  | -1.55935900 |
| H  | 0.05800100  | 1.05403000  | -2.10729600 |
| H  | 0.16954800  | -0.69922200 | -2.24928300 |
| Si | -0.92292300 | -0.04860800 | -0.11748200 |
| C  | -2.54102100 | -0.71519800 | -0.81012100 |
| C  | -1.21764600 | 1.64736600  | 0.64534500  |
| C  | -0.22541800 | -1.22782600 | 1.17037200  |
| C  | -3.77745800 | -0.13795400 | -0.48614300 |
| C  | -2.54222300 | -1.83573400 | -1.65692900 |
| C  | -1.05216900 | 1.90332600  | 2.01294000  |
| C  | -1.61295300 | 2.71478900  | -0.17707300 |
| C  | 0.95524200  | -0.90565900 | 1.86021500  |
| C  | -0.83492500 | -2.45621100 | 1.45855200  |

|   |             |             |             |
|---|-------------|-------------|-------------|
| C | -4.97030100 | -0.65676000 | -0.98880900 |
| H | -3.81294500 | 0.73061300  | 0.16649600  |
| C | -3.73022000 | -2.35981600 | -2.16175000 |
| H | -1.60419600 | -2.31741700 | -1.92495900 |
| C | -1.25672800 | 3.17939900  | 2.53904500  |
| H | -0.75643600 | 1.09928700  | 2.68142400  |
| C | -1.82161700 | 3.99014400  | 0.33997800  |
| H | -1.76146400 | 2.55292200  | -1.24303700 |
| C | 1.51314300  | -1.77735800 | 2.79040000  |
| H | 1.45100700  | 0.04314000  | 1.66594600  |
| C | -0.28273500 | -3.33491000 | 2.39113500  |
| H | -1.75274300 | -2.73746200 | 0.94888900  |
| C | -4.94832500 | -1.76861300 | -1.82823200 |
| H | -5.91578200 | -0.19251800 | -0.72496300 |
| C | -3.70577000 | -3.22784600 | -2.81353500 |
| H | -1.63811900 | 4.22576600  | 1.70282300  |
| H | -1.11834500 | 3.35442600  | 3.60170500  |
| H | -2.12532000 | 4.79957300  | -0.31702500 |
| C | 0.89361800  | -2.99858000 | 3.05598600  |
| H | 2.42986700  | -1.50710300 | 3.30583200  |
| H | -0.77106700 | -4.28298600 | 2.59500300  |
| H | -5.87592200 | -2.17360100 | -2.22121900 |
| H | -1.79591500 | 5.21988100  | 2.10988000  |
| H | 1.32725000  | -3.68373100 | 3.77793000  |

3

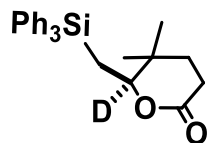

E = -1446.559952

 $G_{\text{Corr}} = 0.430550$  $G_{\text{Corr}}^{\text{D}} = 0.426925$ 

|    |             |             |             |
|----|-------------|-------------|-------------|
| C  | 4.24999700  | 1.30782800  | -0.68100700 |
| C  | 4.57714100  | -0.11914900 | -0.25053600 |
| C  | 2.96845200  | 1.37773100  | -1.52884100 |
| H  | 5.05345400  | -0.67204800 | -1.06873700 |
| H  | 5.28360000  | -0.14414700 | 0.58219400  |
| H  | 4.11703800  | 1.93951300  | 0.20603500  |
| H  | 5.09379500  | 1.72407400  | -1.24169100 |
| O  | 2.15798000  | -0.54840000 | -0.19162700 |
| C  | 3.38635800  | -0.96222000 | 0.14604600  |
| O  | 3.50174400  | -2.04002200 | 0.69043900  |
| C  | 1.84979300  | 0.79869000  | -0.64317800 |
| C  | 2.66345600  | 2.84929800  | -1.83532300 |
| H  | 3.51781100  | 3.30634600  | -2.34524800 |
| H  | 1.79250200  | 2.95628000  | -2.48828900 |
| H  | 2.47611700  | 3.41798000  | -0.91752500 |
| C  | 3.12954800  | 0.59883000  | -2.84188900 |
| H  | 2.27394600  | 0.76283400  | -3.50316200 |
| H  | 4.02736600  | 0.93738200  | -3.36955300 |
| H  | 3.21927100  | -0.47975800 | -2.68061900 |
| C  | 0.46275800  | 0.70101400  | -1.26055300 |
| H  | 0.15440400  | 1.70577800  | -1.57032600 |
| H  | 0.49707100  | 0.08213200  | -2.16468200 |
| Si | -0.88961500 | 0.03728000  | -0.09341400 |
| C  | -2.47619100 | 0.99140000  | -0.45441300 |
| C  | -0.37064000 | 0.36745800  | 1.68672200  |
| C  | -1.23290800 | -1.79471700 | -0.36983300 |
| C  | -3.40288800 | 1.28585400  | 0.55668300  |

|   |             |             |             |
|---|-------------|-------------|-------------|
| C | -2.79502500 | 1.37851900  | -1.76525000 |
| C | 0.07815900  | -0.65627400 | 2.53168900  |
| C | -0.35412900 | 1.68192500  | 2.18040500  |
| C | -0.19868200 | -2.74308000 | -0.44164900 |
| C | -2.55364400 | -2.25564000 | -0.48802200 |
| C | -4.59919700 | 1.94341200  | 0.27281600  |
| H | -3.18891900 | 1.00097200  | 1.58391600  |
| C | -3.98877100 | 2.03572400  | -2.05751500 |
| H | -2.10606300 | 1.16225700  | -2.57909700 |
| C | 0.52841000  | -0.38036600 | 3.82218100  |
| H | 0.08560200  | -1.68388400 | 2.17847900  |
| C | 0.09459300  | 1.96544000  | 3.46870100  |
| H | -0.70148200 | 2.50035700  | 1.55264900  |
| C | -0.47506700 | -4.09703500 | -0.62178800 |
| H | 0.83416700  | -2.42171700 | -0.34927400 |
| C | -2.83441300 | -3.60943500 | -0.66924300 |
| H | -3.37943400 | -1.55025500 | -0.44200500 |
| C | -4.89398500 | 2.32037300  | -1.03611100 |
| H | -5.29982300 | 2.16171000  | 1.07320600  |
| H | -4.21263400 | 2.32496200  | -3.07995400 |
| C | 0.53800400  | 0.93129000  | 4.29268100  |
| H | 0.87385900  | -1.18975700 | 4.45814200  |
| H | 0.09651500  | 2.98962200  | 3.82981000  |
| C | -1.79409100 | -4.53373700 | -0.73636300 |
| H | 0.34187000  | -4.81083200 | -0.67074200 |
| H | -3.86477400 | -3.94049000 | -0.75906000 |
| H | -5.82436400 | 2.83356200  | -1.25965700 |
| H | 0.88822900  | 1.14748000  | 5.29752200  |
| H | -2.00957800 | -5.58865700 | -0.87769200 |
| H | 1.79504000  | 1.41496800  | 0.26420400  |

TS-Si

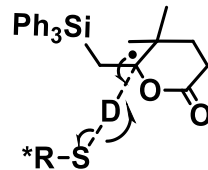

E = -3831.995013

E(rad-dist/int) = -1445.897654

E(RSD-dist/int) = -2386.043844

 $G_{\text{Corr}} = 0.946859$  $G_{\text{Corr}}^{\text{D}} = 0.945209$ 

|   |            |             |             |
|---|------------|-------------|-------------|
| C | 3.87572500 | -1.84208500 | -3.38736000 |
| C | 2.79189300 | -2.88401000 | -3.73273300 |
| C | 3.85983200 | -1.39476300 | -1.90728100 |
| H | 2.02458600 | -2.43054500 | -4.37199500 |
| H | 3.19168900 | -3.74009800 | -4.27629500 |
| H | 4.86574900 | -2.25075800 | -3.60844000 |
| H | 3.75258900 | -0.96709500 | -4.03166700 |
| O | 1.74640000 | -2.56293800 | -1.54698100 |
| C | 2.03105600 | -3.42959200 | -2.55621300 |
| O | 1.61182000 | -4.55819800 | -2.46680200 |
| C | 2.40256400 | -1.33084200 | -1.44487600 |
| C | 4.63394000 | -2.42990900 | -1.06207100 |
| H | 5.68499800 | -2.42052900 | -1.36747600 |
| H | 4.59564600 | -2.19330000 | 0.00226100  |
| H | 4.25923100 | -3.44923600 | -1.20021900 |
| C | 4.53122200 | -0.02387800 | -1.78590000 |
| H | 4.67356700 | 0.25835400  | -0.74192500 |



|    |             |             |             |   |             |             |             |
|----|-------------|-------------|-------------|---|-------------|-------------|-------------|
| H  | 5.51658700  | -0.06086400 | -2.26176500 | H | 0.50904700  | 2.22817900  | 0.86522800  |
| H  | 3.94142600  | 0.75452500  | -2.27918000 | H | -0.67864600 | 3.56484400  | 0.90115400  |
| C  | 1.94375300  | -0.59704600 | -0.22184700 | C | -1.40724600 | -3.03744400 | -1.02489300 |
| H  | 2.25395900  | 0.45012600  | -0.30819900 | C | -1.62388500 | -2.53034800 | 0.25891600  |
| H  | 0.84821500  | -0.57280900 | -0.26498100 | C | -1.38222100 | -4.41719100 | -1.23839600 |
| Si | 2.29799900  | -1.03361700 | 1.60609500  | C | -1.80395500 | -3.39944400 | 1.32866100  |
| C  | 1.26760900  | 0.23285100  | 2.56243000  | H | -1.69165600 | -1.45911700 | 0.40847300  |
| C  | 4.11073300  | -0.81532100 | 2.07572200  | C | -1.55494300 | -5.28326200 | -0.16527000 |
| C  | 1.74829900  | -2.75475000 | 2.13483600  | H | -1.21047300 | -4.79700900 | -2.23890800 |
| C  | 1.83885700  | 1.33712700  | 3.21039400  | C | -1.76393500 | -4.77566900 | 1.11706600  |
| C  | -0.12883300 | 0.10067600  | 2.62055900  | H | -1.97080800 | -3.00351800 | 2.32512200  |
| C  | 4.81394700  | -1.83316600 | 2.73646100  | H | -1.51862200 | -6.35564600 | -0.32666500 |
| C  | 4.79847100  | 0.37424100  | 1.78304800  | H | -1.88948300 | -5.45436900 | 1.95448500  |
| C  | 1.22680500  | -2.94743000 | 3.42422400  | C | 3.19996800  | 4.63589000  | -0.74514200 |
| C  | 1.93424700  | -3.88910500 | 1.33167000  | C | 2.71030600  | 5.85253700  | -1.22850100 |
| C  | 1.05120800  | 2.27952900  | 3.87003600  | C | 4.56483400  | 4.34642100  | -0.83200300 |
| H  | 2.91491700  | 1.47591100  | 3.19974600  | C | 3.58651700  | 6.77542600  | -1.79206100 |
| C  | -0.92344500 | 1.02954700  | 3.28961300  | H | 1.65084300  | 6.07138300  | -1.16217300 |
| H  | -0.60945900 | -0.75392300 | 2.15196000  | C | 5.43655800  | 5.26981000  | -1.39802600 |
| C  | 6.15631400  | -1.67791000 | 3.08090300  | H | 4.92652900  | 3.39478800  | -0.45659700 |
| H  | 4.31180000  | -2.76632500 | 2.97862800  | C | 4.94773000  | 6.48519800  | -1.87754900 |
| C  | 6.13886100  | 0.53506000  | 2.12638700  | H | 3.20703000  | 7.72053500  | -2.16637300 |
| H  | 4.28270300  | 1.18822900  | 1.27864500  | H | 6.49534800  | 5.04277100  | -1.46700700 |
| C  | 0.90281200  | -4.21944700 | 3.89207100  | H | 5.62827500  | 7.20618400  | -2.31947900 |
| H  | 1.06867700  | -2.09295800 | 4.07739500  | C | -5.63664900 | -0.64543700 | -1.33005500 |
| C  | 1.61196900  | -5.16314800 | 1.79266800  | C | -5.18411200 | -1.80535100 | -0.69355300 |
| H  | 2.31722900  | -3.78380100 | 0.32358800  | C | -7.00523000 | -0.43785400 | -1.52309400 |
| C  | -0.33316600 | 2.12868000  | 3.91023400  | C | -6.10159100 | -2.75515100 | -0.25728300 |
| H  | 1.52157400  | 3.12930900  | 4.35577600  | H | -4.12347000 | -1.95725100 | -0.53390300 |
| H  | -1.99868400 | 0.89118500  | 3.32081000  | C | -7.91845300 | -1.39105600 | -1.08615000 |
| C  | 6.82264600  | -0.49356900 | 2.77371400  | H | -7.33893500 | 0.47000200  | -2.01420100 |
| H  | 6.68082100  | -2.48250000 | 3.58751300  | C | -7.46678700 | -2.54983500 | -0.45364700 |
| H  | 6.64977600  | 1.46333600  | 1.88763100  | H | -5.74841000 | -3.65422300 | 0.23709800  |
| C  | 1.09726500  | -5.33182500 | 3.07592000  | H | -8.98095000 | -1.23152400 | -1.23765100 |
| H  | 0.49920200  | -4.34054700 | 4.89307900  | H | -8.18060200 | -3.29321000 | -0.11252900 |
| H  | 1.75306700  | -6.02102200 | 1.14239400  | C | -4.55655800 | 2.65312900  | 1.59274400  |
| H  | -0.94899800 | 2.85838400  | 4.42761800  | C | -5.37316000 | 2.15648200  | 2.61287300  |
| H  | 7.86841100  | -0.37116600 | 3.03913300  | C | -4.70130200 | 3.97386400  | 1.15722100  |
| H  | 0.84211600  | -6.32430100 | 3.43570500  | C | -6.32805400 | 2.97941000  | 3.19919000  |
| S  | 1.33080400  | 0.37265100  | -3.67688800 | H | -5.25157600 | 1.12712400  | 2.93275200  |
| O  | 0.34886800  | 1.71898200  | -1.64560000 | C | -5.65876900 | 4.79321900  | 1.74661700  |
| O  | -0.91465600 | -0.87769700 | -1.80791500 | H | -4.07214300 | 4.35180300  | 0.35999000  |
| O  | -1.46341800 | -2.43761200 | -3.34291400 | C | -6.47061700 | 4.29789000  | 2.76657400  |
| O  | -3.41020800 | 0.03453800  | -1.62001400 | H | -6.96219800 | 2.59356600  | 3.99043200  |
| O  | -5.02221700 | 1.46848000  | -2.27810400 | H | -5.77351900 | 5.81767300  | 1.40830400  |
| O  | -2.81187600 | 2.33289200  | 0.04315500  | H | -7.21741000 | 4.93972700  | 3.22329800  |
| O  | -3.40513500 | 0.57565800  | 1.32738400  |   |             |             |             |
| O  | 1.02195400  | 3.98086500  | -0.13072200 |   |             |             |             |
| O  | 2.71217000  | 2.55399700  | 0.30897600  |   |             |             |             |
| C  | -0.08146000 | 1.14802000  | -2.86417800 |   |             |             |             |
| C  | -1.27323700 | 0.21481000  | -2.64778900 |   |             |             |             |
| C  | -2.37812000 | 0.96827200  | -1.90965600 |   |             |             |             |
| C  | -1.81737300 | 1.54901000  | -0.61217200 |   |             |             |             |
| C  | -0.63634600 | 2.46397800  | -0.95376800 |   |             |             |             |
| C  | 0.03970300  | 3.02471800  | 0.28403200  |   |             |             |             |
| C  | -1.27033900 | -2.12776400 | -2.18824600 |   |             |             |             |
| C  | -4.69447400 | 0.40320700  | -1.79894200 |   |             |             |             |
| C  | -3.55336100 | 1.73320200  | 0.99852900  |   |             |             |             |
| C  | 2.31005100  | 3.60815800  | -0.13870200 |   |             |             |             |
| H  | 1.80995800  | -0.51213800 | -2.48444900 |   |             |             |             |
| H  | -0.41367800 | 1.93906100  | -3.55524000 |   |             |             |             |
| H  | -1.63048200 | -0.15744300 | -3.61013700 |   |             |             |             |
| H  | -2.77758600 | 1.77260100  | -2.53522500 |   |             |             |             |
| H  | -1.49064100 | 0.74724500  | 0.05371800  |   |             |             |             |
| H  | -0.99004600 | 3.29627700  | -1.58381200 |   |             |             |             |

### TS-Re

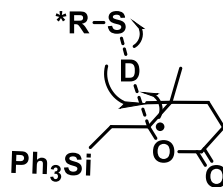

E = -3831.993035

E(rad-dist/int) = -1445.900641

E(RSD-dist/int) = -2386.046738

G<sub>Corr</sub> = 0.94651094

G<sub>Corr</sub><sup>D</sup> = 0.944847

C            0.98159400    3.82509200    0.29473400

|    |             |             |             |   |             |             |             |
|----|-------------|-------------|-------------|---|-------------|-------------|-------------|
| C  | 0.32574500  | 3.12999200  | 1.48074500  | C | -1.29696700 | 1.20568600  | -2.16048900 |
| C  | 2.30251800  | 3.14697500  | -0.10841600 | C | -1.31738100 | -0.31516700 | -2.02706900 |
| H  | -0.70976700 | 3.44866400  | 1.61113900  | C | -2.69404100 | -0.75882300 | -1.51247100 |
| H  | 0.84654100  | 3.36795400  | 2.41631800  | C | -3.05162300 | 0.00974600  | -0.24988900 |
| H  | 1.17483800  | 4.87429500  | 0.54248500  | C | -2.94771600 | 1.51655600  | -0.50559500 |
| H  | 0.29544400  | 3.81122700  | -0.55861000 | C | -3.22213100 | 2.29446600  | 0.77100900  |
| O  | 1.24079600  | 1.02123000  | 0.60857500  | C | 0.25817800  | -1.91576500 | -1.27148000 |
| C  | 0.32414600  | 1.62694700  | 1.39950700  | C | -2.82208800 | -3.06120500 | -2.11288600 |
| O  | -0.40153200 | 0.92186100  | 2.06298900  | C | -4.59756100 | -1.11018900 | 1.17221400  |
| C  | 1.98280000  | 1.67594000  | -0.37669100 | C | -3.81374900 | 4.42979100  | -0.07316400 |
| C  | 3.34166600  | 3.27136900  | 1.02315700  | H | 1.08275200  | 1.75332200  | -1.49248300 |
| H  | 3.05337100  | 2.72476200  | 1.92373800  | H | -2.04833400 | 1.46897000  | -2.92184500 |
| H  | 3.46465200  | 4.32772300  | 1.28489000  | H | -1.09829900 | -0.77529000 | -2.99263800 |
| H  | 4.31668700  | 2.89344900  | 0.70181300  | H | -3.45103100 | -0.60204000 | -2.28741600 |
| C  | 2.85561000  | 3.83686900  | -1.36102900 | H | -2.37811000 | -0.26852700 | 0.56346900  |
| H  | 3.81656200  | 3.41663200  | -1.66604700 | H | -3.66544700 | 1.81421400  | -1.28432900 |
| H  | 3.01980100  | 4.89600300  | -1.13919700 | H | -2.55616800 | 1.95655000  | 1.56681900  |
| H  | 2.16115700  | 3.77721600  | -2.20303100 | H | -4.26420700 | 2.16115700  | 1.06808100  |
| C  | 2.97128900  | 0.70715800  | -0.95868700 | C | 0.61577500  | -2.61429900 | -0.01176600 |
| H  | 3.38864900  | 1.13654000  | -1.87546500 | C | 0.00078300  | -2.27656900 | 1.19742700  |
| H  | 2.39008200  | -0.16288500 | -1.28628000 | C | 1.49185100  | -3.70059900 | -0.07566100 |
| Si | 4.39694400  | -0.05111300 | 0.07655000  | C | 0.24206600  | -3.04413700 | 2.33145100  |
| C  | 6.03562200  | 0.81435900  | -0.27829100 | H | -0.65663900 | -1.41917200 | 1.25325000  |
| C  | 4.06475900  | -0.05238500 | 1.92645500  | C | 1.75238600  | -4.44670600 | 1.06758400  |
| C  | 4.55412400  | -1.83684500 | -0.50919200 | H | 1.96659800  | -3.94804700 | -1.01877100 |
| C  | 7.16267100  | 0.47229700  | 0.48816000  | C | 1.11845600  | -4.12685900 | 2.26850400  |
| C  | 6.21744300  | 1.73185200  | -1.32112900 | H | -0.25075000 | -2.78934200 | 3.26413100  |
| C  | 3.06291700  | -0.89302500 | 2.43299600  | H | 2.44687400  | -5.27869800 | 1.01949600  |
| C  | 4.75207500  | 0.76785100  | 2.83189800  | H | 1.31308900  | -4.71903200 | 3.15762900  |
| C  | 5.00070600  | -2.84511200 | 0.35667600  | C | -2.57372600 | -4.43156900 | -1.59537700 |
| C  | 4.28847000  | -2.18817300 | -1.84131300 | C | -2.60330700 | -5.49650600 | -2.49940100 |
| C  | 8.41048900  | 1.03634600  | 0.23668400  | C | -2.27993200 | -4.66007300 | -0.24676900 |
| H  | 7.06889600  | -0.24885000 | 1.29700100  | C | -2.33392400 | -6.78698100 | -2.05713200 |
| C  | 7.46330400  | 2.30232700  | -1.58081300 | H | -2.82827400 | -5.29942700 | -3.54215200 |
| H  | 5.38304600  | 2.00829700  | -1.95862900 | C | -2.00970100 | -5.95261800 | 0.18967500  |
| C  | 2.74712300  | -0.90527200 | 3.78840900  | H | -2.25724200 | -3.83123400 | 0.45126200  |
| H  | 2.51181000  | -1.54314600 | 1.76012100  | C | -2.03446500 | -7.01461600 | -0.71351600 |
| C  | 4.44550800  | 0.75745000  | 4.19155400  | H | -2.35217400 | -7.61412600 | -2.75914400 |
| H  | 5.53205900  | 1.43557800  | 2.47584300  | H | -1.77438300 | -6.12778600 | 1.23433600  |
| C  | 5.17305900  | -4.15449200 | -0.08746700 | H | -1.81885300 | -8.02191700 | -0.37077000 |
| H  | 5.20284100  | -2.61263600 | 1.39930100  | C | -6.03993100 | -1.40931000 | 1.37766800  |
| C  | 4.45661100  | -3.49556900 | -2.29228100 | C | -6.38933000 | -2.24868600 | 2.43938700  |
| H  | 3.93744000  | -1.43969600 | -2.54783500 | C | -7.03204300 | -0.88023300 | 0.54623500  |
| C  | 8.56262100  | 1.95865500  | -0.79826600 | C | -7.72515200 | -2.55859200 | 2.66866700  |
| H  | 9.26382800  | 0.75555000  | 0.84643500  | H | -5.60661800 | -2.65044600 | 3.07383000  |
| H  | 7.57343600  | 3.01177300  | -2.39528600 | C | -8.36769600 | -1.19193100 | 0.78067900  |
| C  | 3.43843800  | -0.07781700 | 4.67186800  | H | -6.75792700 | -0.22987100 | -0.27618000 |
| H  | 1.95860700  | -1.55753200 | 4.15033000  | C | -8.71470600 | -2.03013900 | 1.83956500  |
| H  | 4.99056700  | 1.40291300  | 4.87381300  | H | -7.99526300 | -3.21126800 | 3.49225100  |
| C  | 4.89905200  | -4.48318600 | -1.41359400 | H | -9.13775900 | -0.78104600 | 0.13618700  |
| H  | 5.51303000  | -4.91950300 | 0.60433200  | H | -9.75760100 | -2.27214400 | 2.01878100  |
| H  | 4.23388100  | -3.74362300 | -3.32545400 | C | -3.34223600 | 5.82860200  | -0.26643400 |
| H  | 9.53383200  | 2.40144100  | -0.99640000 | C | -2.06053300 | 6.23327200  | 0.11897600  |
| H  | 3.19413100  | -0.08471700 | 5.72987000  | C | -4.21275800 | 6.74214100  | -0.86647400 |
| H  | 5.02579200  | -5.50423400 | -1.76058800 | C | -1.65464800 | 7.54635200  | -0.09597600 |
| S  | 0.25113000  | 1.88189300  | -2.79644500 | H | -1.38656000 | 5.52013600  | 0.57816300  |
| O  | -1.62830000 | 1.82536500  | -0.93175200 | C | -3.80510700 | 8.05530200  | -1.07582300 |
| O  | -0.37032300 | -0.73889800 | -1.05225800 | H | -5.20232900 | 6.41155500  | -1.16340300 |
| O  | 0.46641400  | -2.35580000 | -2.38253800 | C | -2.52599800 | 8.45772000  | -0.69167000 |
| O  | -2.64967400 | -2.13389000 | -1.14949100 | H | -0.65827500 | 7.85819000  | 0.19995000  |
| O  | -3.12053500 | -2.78172000 | -3.25429000 | H | -4.48285200 | 8.76426900  | -1.53973800 |
| O  | -4.39627600 | -0.30127000 | 0.10937800  | H | -2.20759200 | 9.48206200  | -0.85789100 |
| O  | -3.70234700 | -1.52994200 | 1.87262600  |   |             |             |             |
| O  | -2.92926700 | 3.68364200  | 0.60441700  |   |             |             |             |
| O  | -4.87415000 | 3.99881000  | -0.47991800 |   |             |             |             |

## 9. Supplementary References

1. Luo, J., Zhang, J. *ACS Catal.* **2016**, *6*, 873-877.
2. Garreau, M., Vaillant, F. L., Waser, J. *Angew. Chem. Int. Ed.* **2019**, *58*, 8182-8186.
3. (a) Doyle, L. M., O'Sullivan, S., Salvo, C. D., McKinney, M., McArdle, P., Murphy, P.V. *Org. Lett.* **2017**, *19*, 5802-5805. (b) Abronina, P. I., Galkin, K. I., Backinowsky, L. V., Gracheva, A. A. *Russ. Chem. Bull.* **2009**, *58*, 457-467. (c) Cai, Y., Roberts, B. P., Tocher, D. A. *J. Chem. Soc., Perkin Trans.1*, **2002**, 1376-1386. (c)
4. (a) Shin, N. Y., Ryss, J. M., Zhang, X., Miller, S. J., Knowles, R. R. *Science* **2019**, *366*, 364-369. (b) Featherston, A. L., Kwon, Y., Pompeo, M. M., Engl, O. D., Leahy, D. K., Miller, S. J. *Science* **2021**, *371*, 702-707.
5. (a) Haque, M. B., Roberts, B. P., Tocher, D. A. *J. Chem. Soc., Perkin Trans.1*, **1998**, 2881-2889. (b) Larsen, J., Bechgaard, K. *Acta Chem. Scand.* **1996**, *50*, 77-82. (c) Wang, J. L., Li, H. J., Wang, H. S., Wu, Y. C. *Org. Lett.* **2017**, *19*, 3811-3814. (d) Ramesh, R., Chandrasekaran, Y., Megha R., Chandrasekaran, S., *Tetrahedron* **2007**, *63*, 9153-9162.
6. (a) Binder, J., Fischer, R. C., Flock, M., Stammler, H. G., Torvisco, A., Uhlig, F. *Phosphorus, Sulfur Silicon Relat. Elem.* **2016**, *191*, 478-487. (b) Binder, J., Fischer, R. C., Flock, M., Stammler, H. G., Torvisco, A., Uhlig, F. *Phosphorus, Sulfur Silicon Relat. Elem.* **2015**, *190*, 1980-1994. (c) Liang, H., Wang, L. J., Ji, Y. X., Wang, H., Zhang, B. *Angew. Chem. Int. Ed.* **2021**, *60*, 1839-1844. (d) Kan, S. B. J., Lewis, R. D., Chen, K., Arnold, F. H. *Science* **2016**, *354*, 1048-1051.
7. Sakai, N., Moriya, T., Konakahara, T. *J. Org. Chem.* **2007**, *72*, 5920-5922.
8. Cismesia, M. A., Yoon, T. P. Characterizing chain processes in visible light photoredox catalysis. *Chem. Sci.* **6**, 5426-5434 (2015).
9. Ham, W. S., Hillenbrand, J., Jacq, J., Genicot, C., Ritter, T. Divergent late-stage (hetero)aryl C-H amination by the pyridinium radical cation. *Angew. Chem. Int. Ed.* **58**, 532-536 (2019).
10. Luis-Barrera, J., LainaMartin, V., Rigotti, T., Peccati, F., Solans-Monfort, X., Sodupe, M., Mas-Balleste, R., Liras, M., Alemán, J. Visible-light photocatalytic intramolecular cyclopropane ring expansion. *Angew. Chem. Int. Ed.* **56**, 7826-7830 (2017).
11. Klauck, F. J. R., James, M. J., Glorius, F. Deaminative strategy for the visible-light-mediated generation of alkyl radicals. *Angew. Chem. Int. Ed.* **56**, 12336-12339 (2017).

12. Quantum yield for the ferrioxalate actinometer was reported to be 1.11 at 436 nm. We thus chose 1.11 as quantum yield for the ferrioxalate actinometer at 441 nm to determine the photo flux of the light source. For details, see: Kuhn, H. J., Braslavsky, S. E., Schmidt, R. Chemical actinometry (IUPAC technical report). *Pure Appl. Chem.* **76**, 2105-2146 (2004).
13. Gaussian 16, Revision C.01, Frisch, M. J., Trucks, G. W., Schlegel, H. B., Scuseria, G. E., Robb, M. A., Cheeseman, J. R., Scalmani, G., Barone, V., Petersson, G. A., Nakatsuji, H., Li, X., Caricato, M., Marenich, A. V., Bloino, J., Janesko, B. G., Gomperts, R., Mennucci, B., Hratchian, H. P., Ortiz, J. V., Izmaylov, A. F., Sonnenberg, J. L., Williams-Young, D., Ding, F., Lipparini, F., Egidi, F., Goings, J., Peng, B., Petrone, A., Henderson, T., Ranasinghe, D., Zakrzewski, V. G., Gao, J., Rega, N., Zheng, G., Liang, W., Hada, M., Ehara, M., Toyota, K., Fukuda, R., Hasegawa, J., Ishida, M., Nakajima, T., Honda, Y., Kitao, O., Nakai, H., Vreven, T., Throssell, K., Montgomery, J. A., Jr., Peralta, J. E., Ogliaro, F., Bearpark, M. J., Heyd, J. J., Brothers, E. N., Kudin, K. N., Staroverov, V. N., Keith, T. A., Kobayashi, R., Normand, J., Raghavachari, K., Rendell, A. P., Burant, J. C., Iyengar, S. S., Tomasi, J., Cossi, M., Millam, J. M., Klene, M., Adamo, C., Cammi, R., Ochterski, J. W., Martin, R. L., Morokuma, K., Farkas, O., Foresman, J. B., Fox, D. J., *Gaussian, Inc., Wallingford CT, 2016*.
14. Chai, J. D., Head-Gordon, M. *Phys. Chem. Chem. Phys.*, **2008**, *10*, 6615-6620.
15. Grimme, S. *Chem. Eur. J.* **2012**, *18*, 9955-9964.
16. Adamo C., Barone, V. *J. Chem. Phys.* **1999**, *110*, 6158-6169.
17. Minenkov, Y., Singstad, Å., Occhipinti G., Jensen, V. R. *Dalton Trans.* **2012**, *41*, 5526-5541.
18. Barone, V., Cossi, M. *J. Phys. Chem. A* **1998**, *102*, 1995-2001. (b) Cossi, M., Rega, N., Scalmani, G., Barone, V. *J. Comp. Chem.* **2003**, *24*, 669-681.
19. Pracht, P., Bohle, F., Grimme, S. *Phys. Chem. Chem. Phys.* **2020**, *22*, 7169-7192.
20. (a) Johnson, E. R., Keinan, S., Mori-Sanchez P., Contreras-Garcia J., Cohen, A. J., Yang W. *J. Am. Chem. Soc.* **2010**, *132*, 6498-6506. (b) Contreras-Garcia, J., Johnson, E. R., Keinan, S., Chaudret, R., Piquemal, J. P., Beratan, D. N., Yang, W. *J. Chem. Theory Comput.* **2011**, *7*, 625-632.

# 10. NMR Spectra and HPLC Spectra

## <sup>1</sup>H NMR spectra of 3

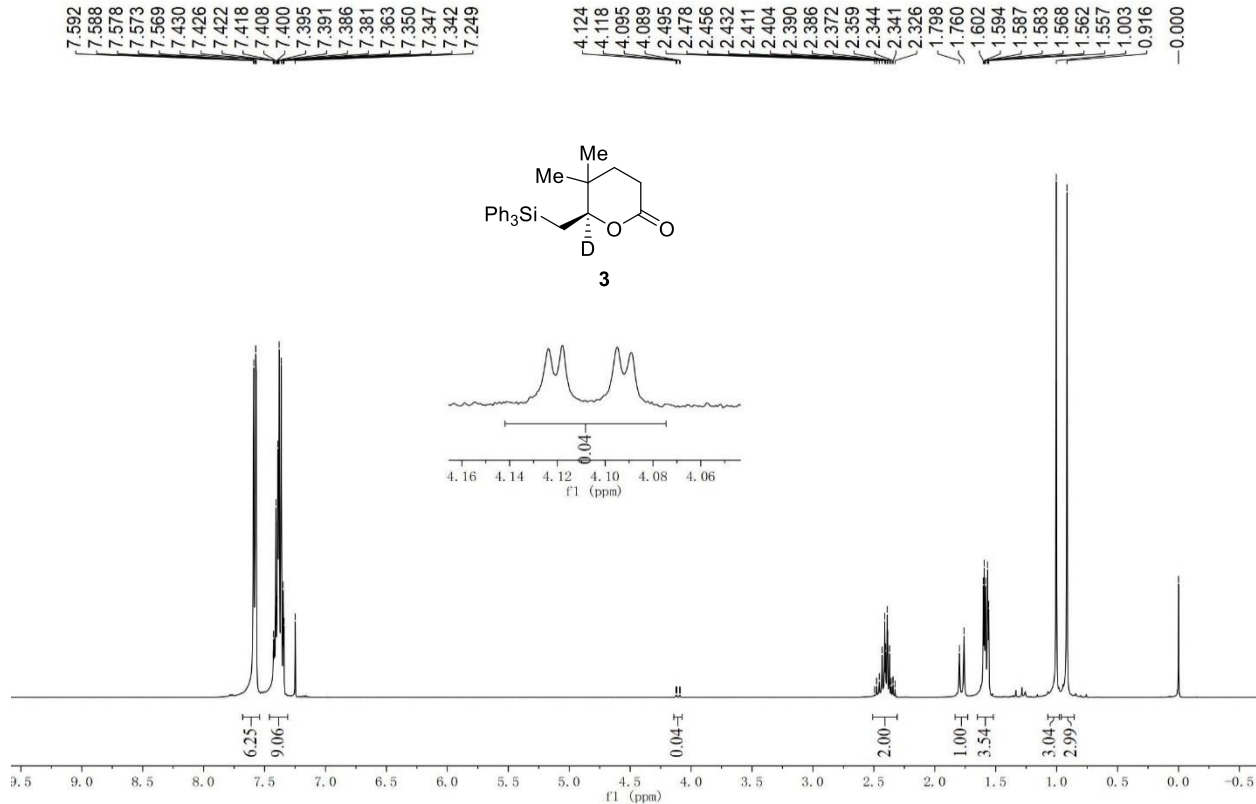

## <sup>13</sup>C NMR spectra of 3

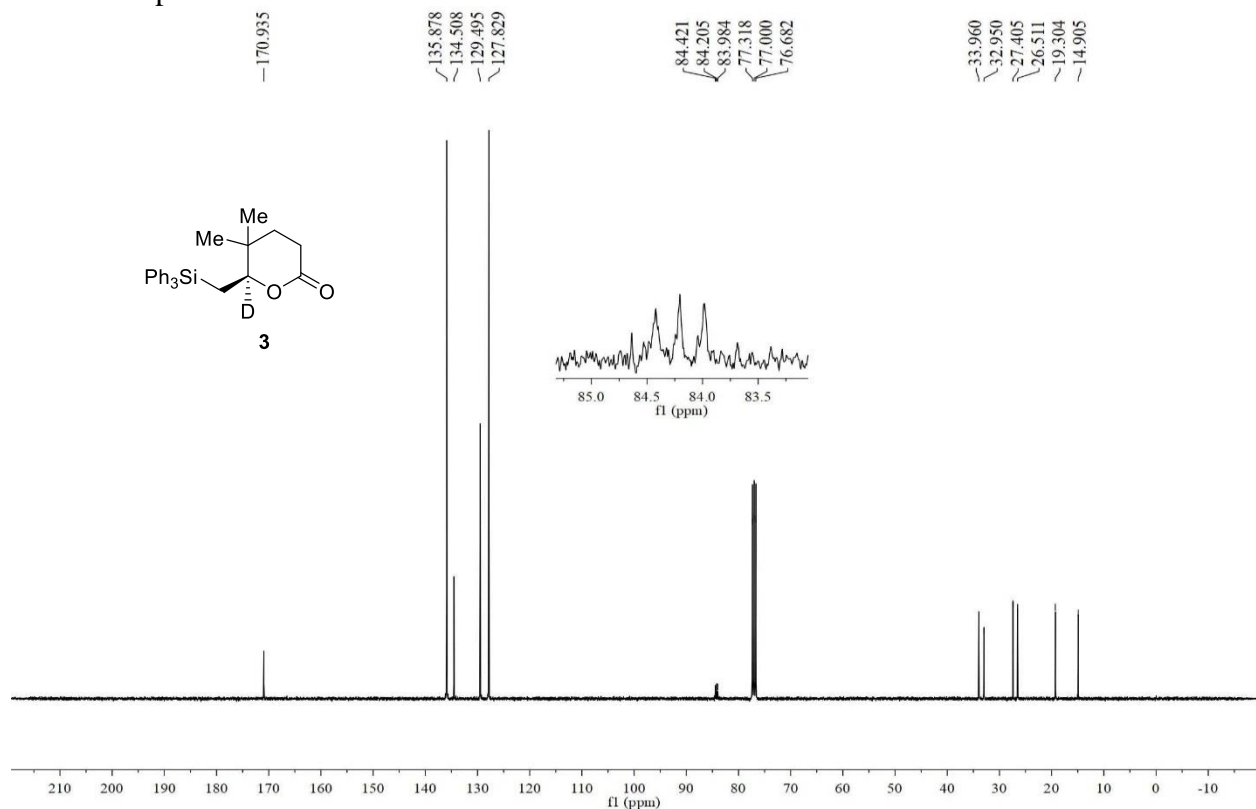

### HPLC spectra of racemic **3**

Data File : (3-racemic)SQL-5-27.lcd  
 Method File : 3AD-H-98.5-1-214.lcm  
 Date Processed : 7/17/2021 9:46:28 AM

#### <Chromatogram View>

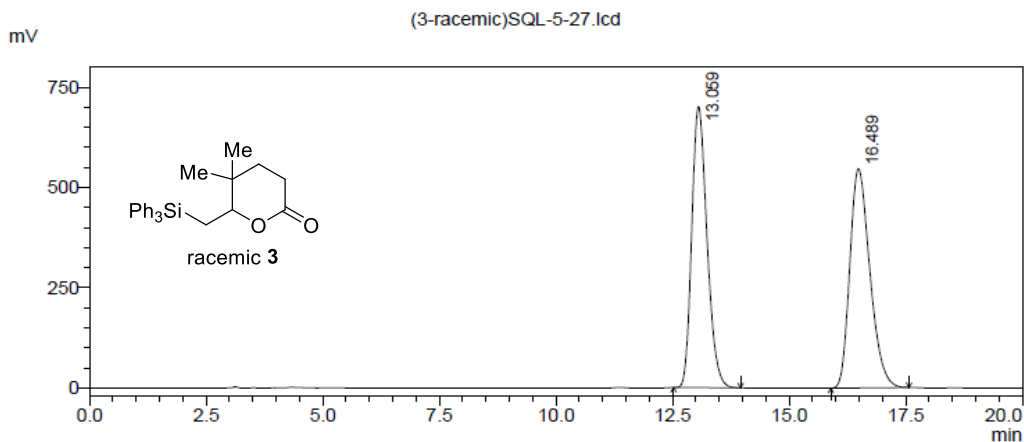

#### <Data Analysis>

| DetA 214nm |           |         |          |         |
|------------|-----------|---------|----------|---------|
| Pesk #     | Ret. Time | Height  | Area     | Area%   |
| 1          | 13.059    | 701032  | 15969014 | 49.394  |
| 2          | 16.489    | 546518  | 16360904 | 50.606  |
| Total      |           | 1247550 | 32329918 | 100.000 |

### HPLC spectra of **3**

Data File : (3-CHIRAL)RAM-2-362B-CHIRAL.lcd  
 Method File : 3AD-H-98.5-1-214.lcm  
 Date Processed : 10/23/2021 7:46:32 PM

#### <Chromatogram View>

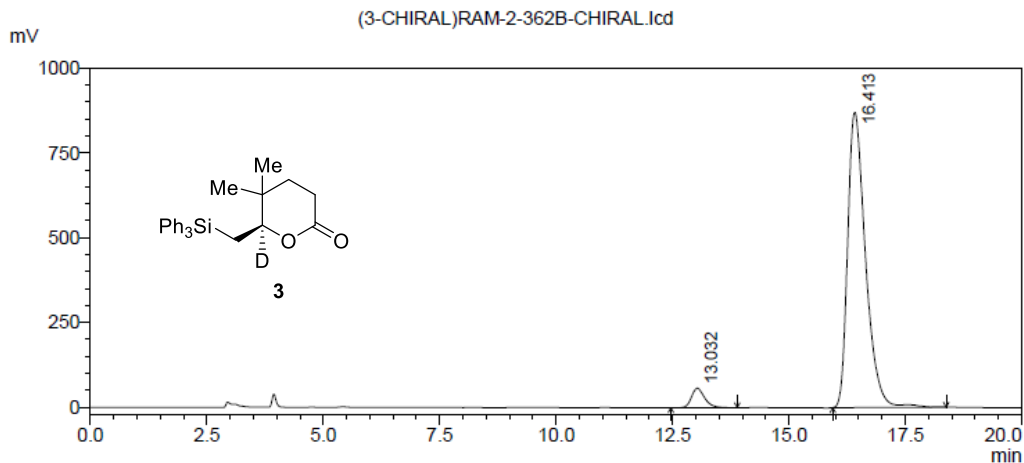

#### <Data Analysis>

| DetA 214nm |           |        |          |         |
|------------|-----------|--------|----------|---------|
| Pesk #     | Ret. Time | Height | Area     | Area%   |
| 1          | 13.032    | 57269  | 1112174  | 4.577   |
| 2          | 16.413    | 869816 | 23188127 | 95.423  |
| Total      |           | 927085 | 24300300 | 100.000 |

<sup>1</sup>H NMR spectra of 4

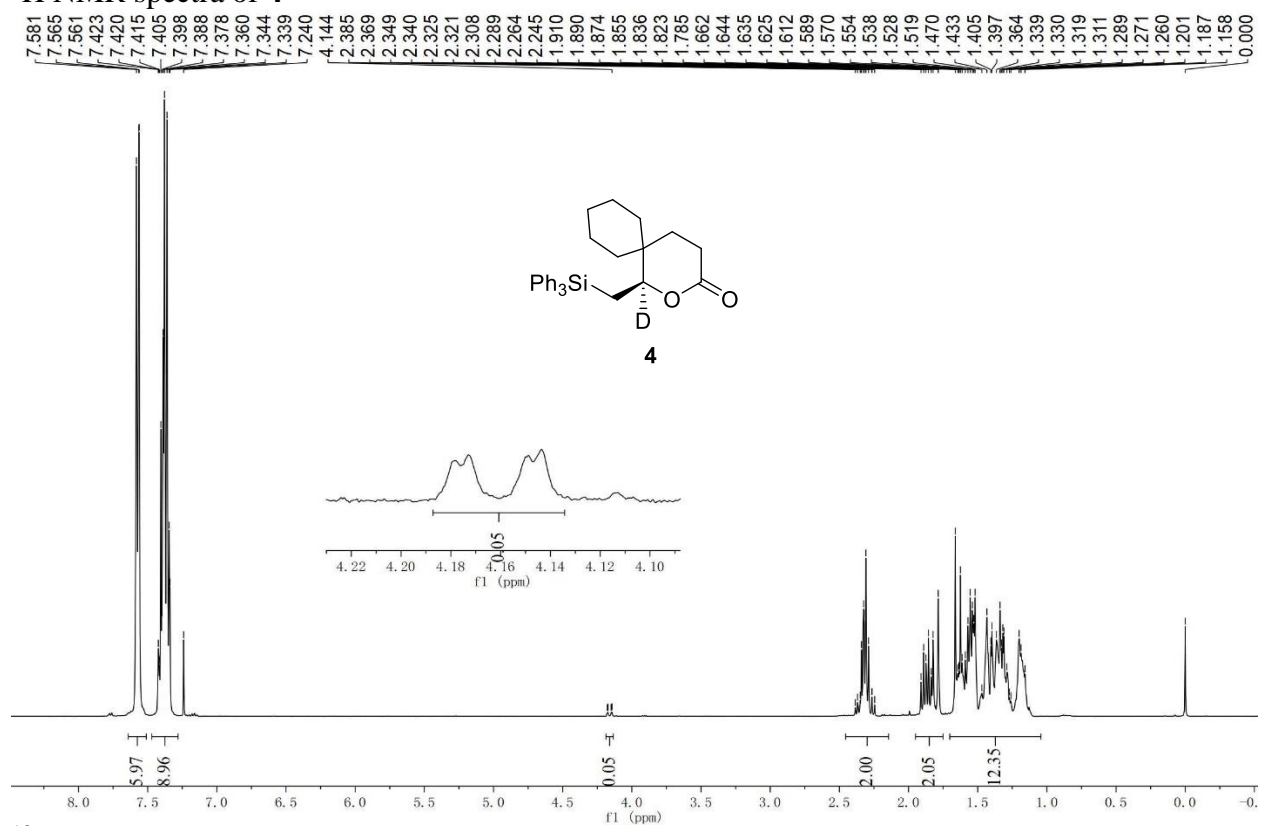

<sup>13</sup>C NMR spectra of 4

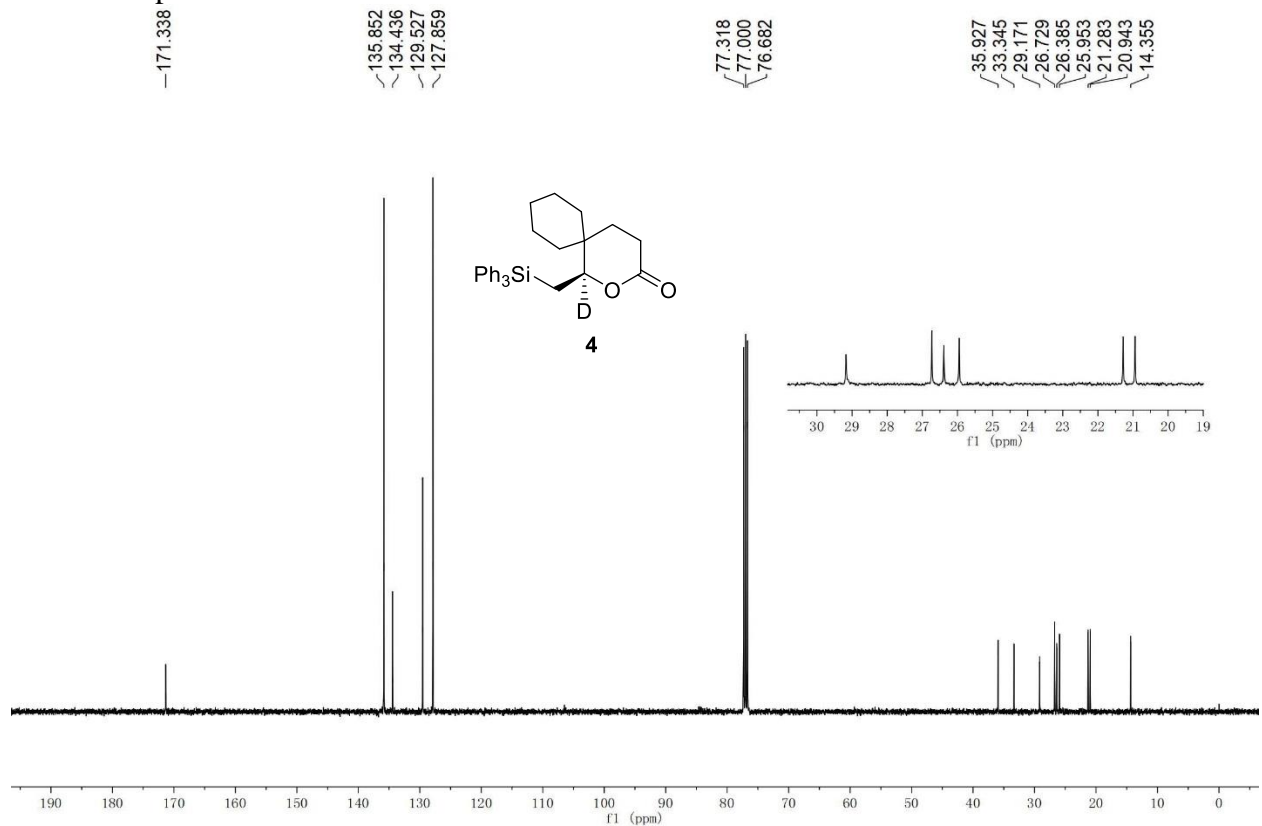

# HPLC spectra of racemic **4**

Data File : 4-RACEMIC-sql-4-11.lcd  
 Method File : 4OD-H-98.5-1-214-20min.lcm  
 Date Processed : 7/17/2021 9:55:26 AM

## <Chromatogram View>

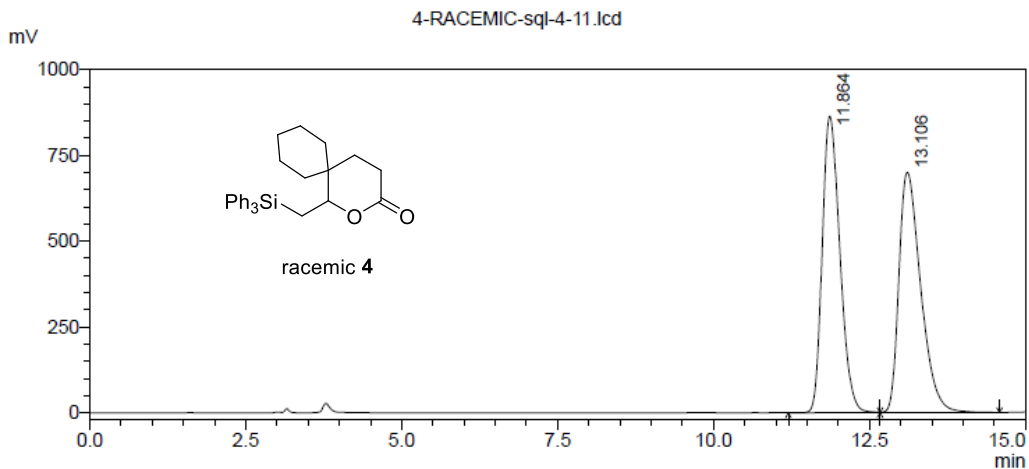

## <Data Analysis>

DetA 214nm

| Peak # | Ret. Time | Height  | Area     | Area%   |
|--------|-----------|---------|----------|---------|
| 1      | 11.864    | 864007  | 17014581 | 49.940  |
| 2      | 13.106    | 699883  | 17055156 | 50.060  |
| Total  |           | 1563891 | 34069737 | 100.000 |

Data File : 4-CHIRAL-RAM-3-314-2.lcd  
 Method File : 4OD-H-98.5-1-214-20min.lcm  
 Date Processed : 7/17/2021 9:59:21 AM

## <Chromatogram View>

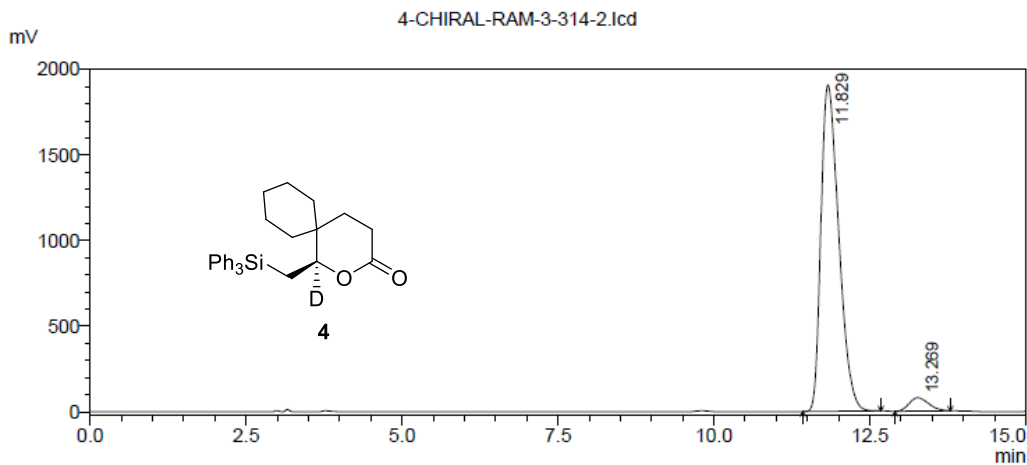

## <Data Analysis>

DetA 214nm

| Peak # | Ret. Time | Height  | Area     | Area%   |
|--------|-----------|---------|----------|---------|
| 1      | 11.829    | 1905801 | 37839866 | 95.697  |
| 2      | 13.269    | 78230   | 1701439  | 4.303   |
| Total  |           | 1984031 | 39541305 | 100.000 |



<sup>1</sup>H NMR spectra of **5**

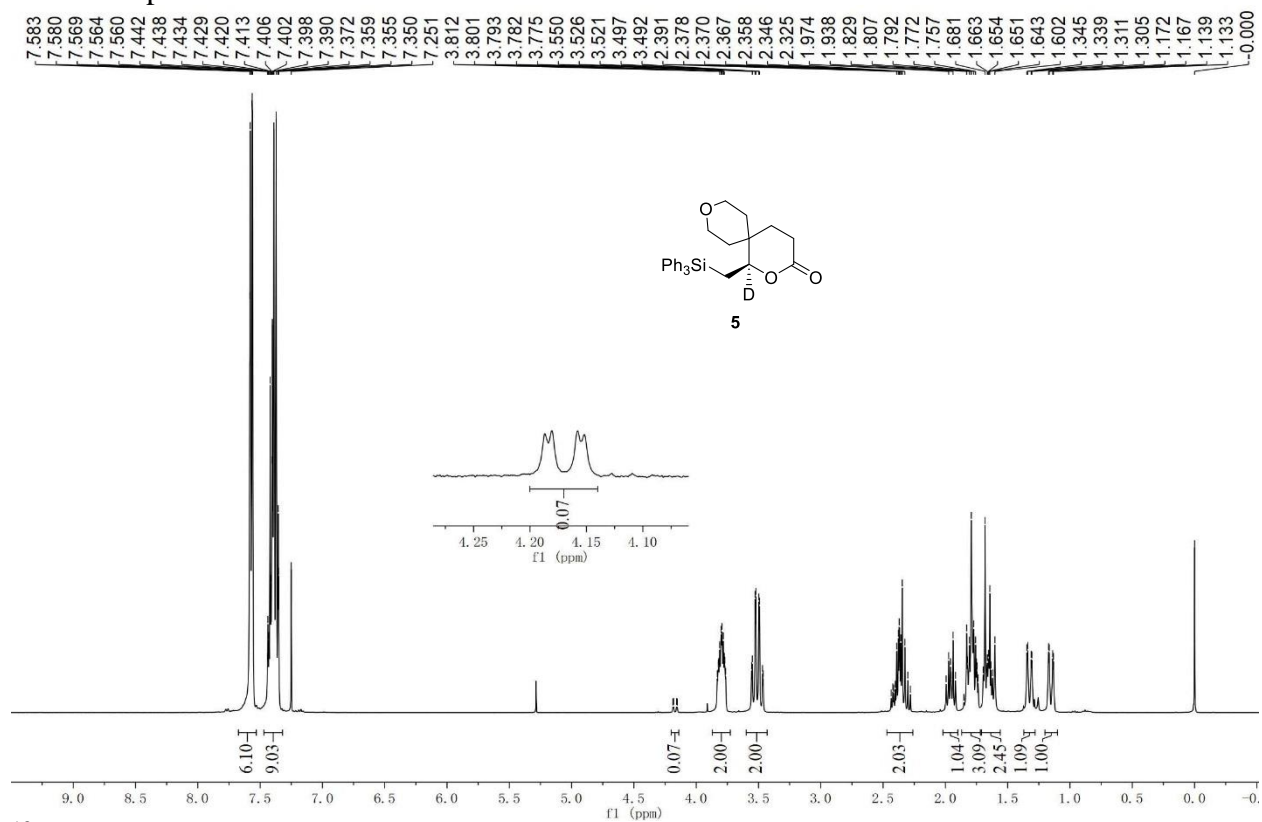

<sup>13</sup>C NMR spectra of **5**

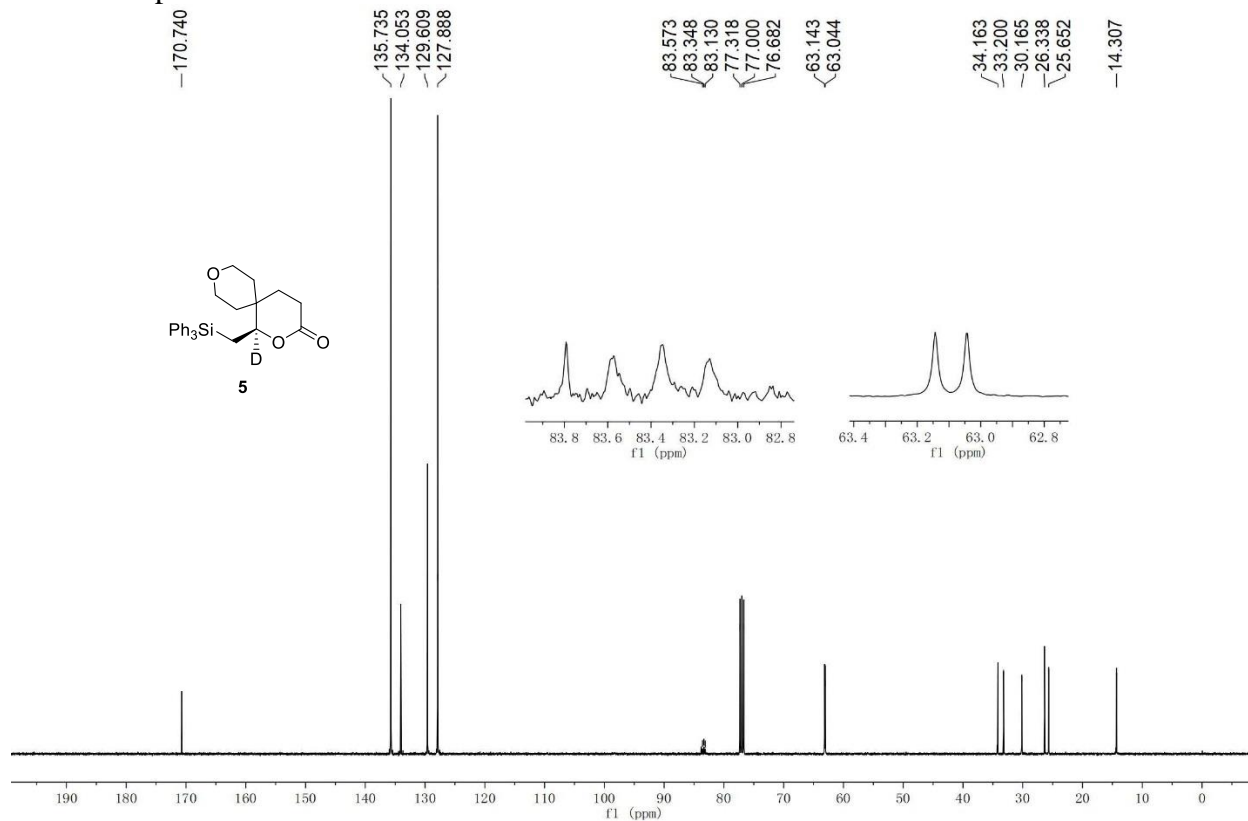

## HPLC spectra of racemic **5**

Data File : 5-RACEMIC-SQL-4-22-1-1.lcd  
 Method File : AD-H-95+5-1-214.lcm  
 Date Processed : 7/17/2021 10:03:04 AM

<Chromatogram View>

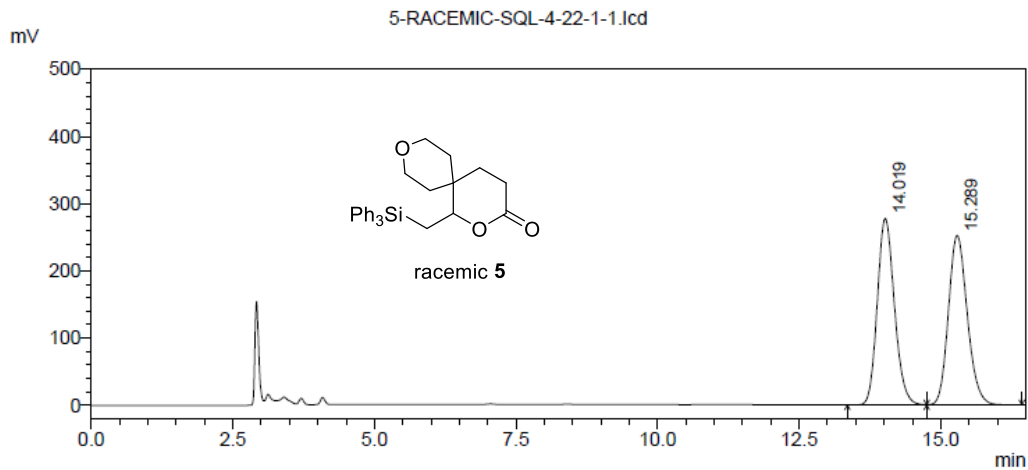

<Data Analysis>

???A 214nm

| Pesk # | Ret. Time | Height | Area     | Area%   |
|--------|-----------|--------|----------|---------|
| 1      | 14.019    | 277553 | 5842874  | 49.982  |
| 2      | 15.289    | 252266 | 5846979  | 50.018  |
| Total  |           | 529820 | 11689854 | 100.000 |

## HPLC spectra of **5**

Data File : 5-CHIRAL-ram-3-184.lcd  
 Method File : AD-H-95+5-1-214.lcm  
 Date Processed : 7/17/2021 10:09:16 AM

<Chromatogram View>

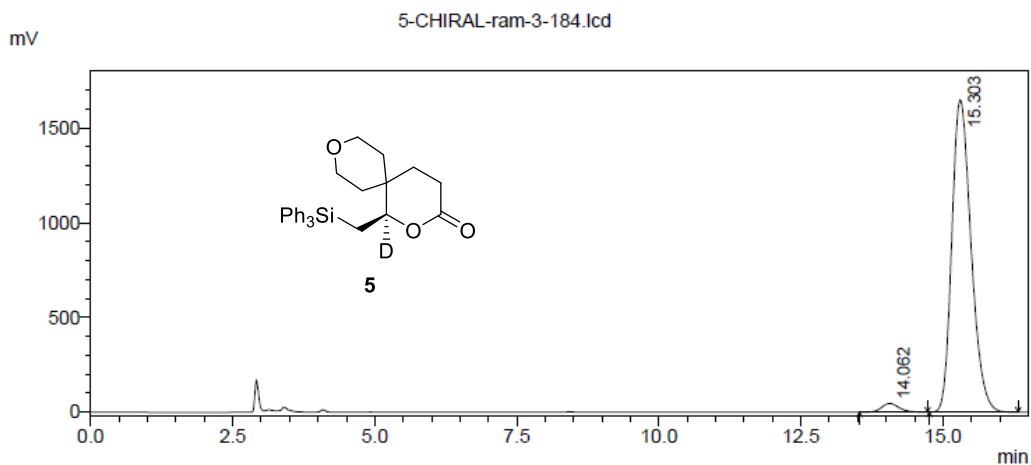

<Data Analysis>

???A 214nm

| Pesk # | Ret. Time | Height  | Area     | Area%   |
|--------|-----------|---------|----------|---------|
| 1      | 14.062    | 45903   | 973578   | 2.445   |
| 2      | 15.303    | 1647211 | 38840778 | 97.555  |
| Total  |           | 1693114 | 39814356 | 100.000 |

# $^1\text{H}$ NMR spectra of **6**

RAM-2-303B.1.fid

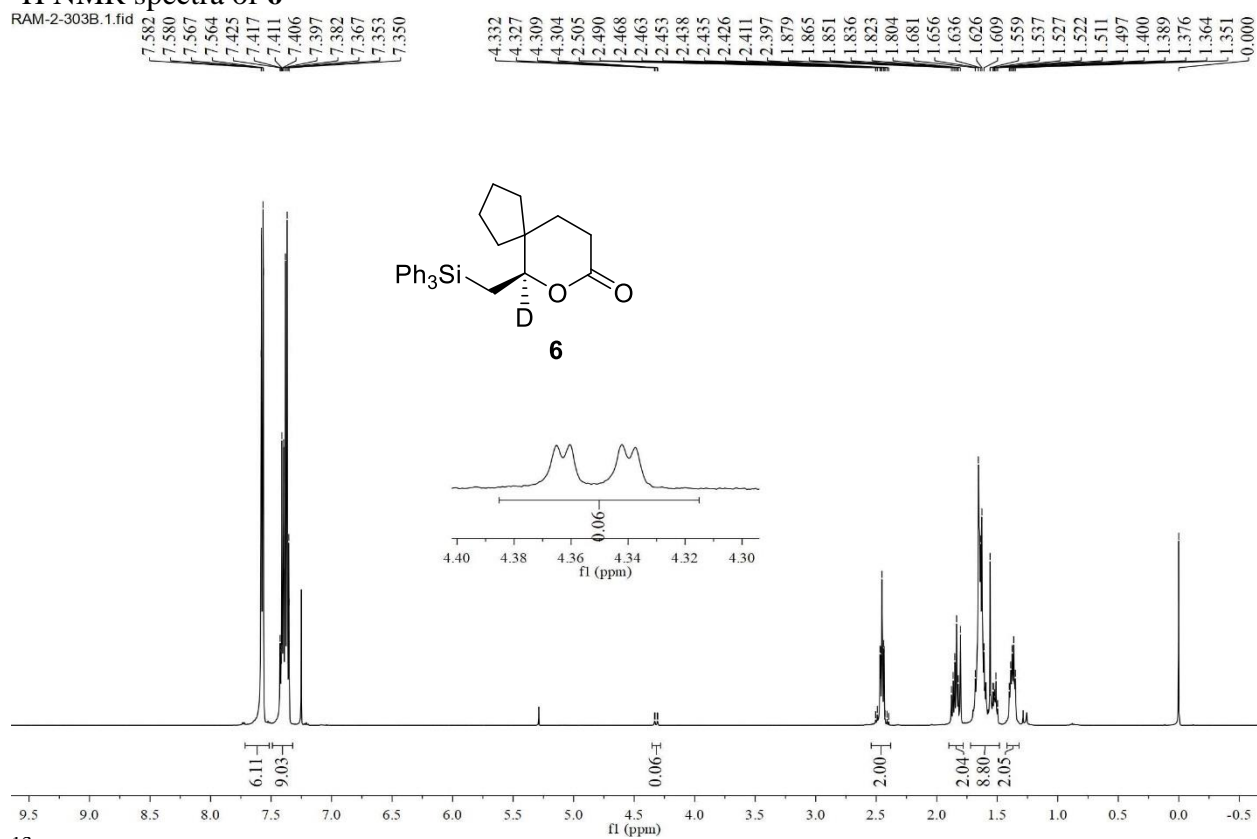

# $^{13}\text{C}$ NMR spectra of **6**

ram-2-303carbon.1.fid

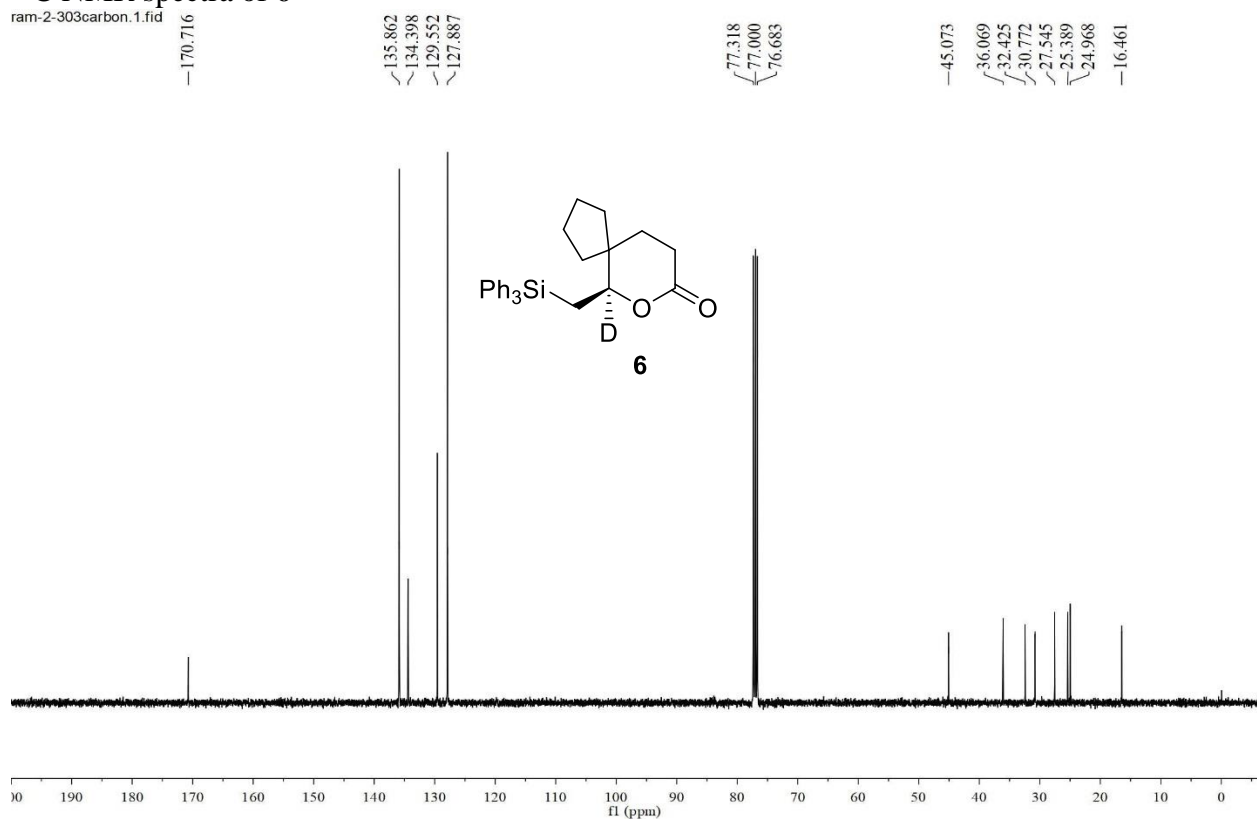

## HPLC spectra of racemic **6**

Data File : (6-RACEMIC)SQL-4-40-1.lcd  
 Method File : AD-H-95+5-1-214.lcm  
 Date Processed : 7/17/2021 10:09:02 AM

### <Chromatogram View>

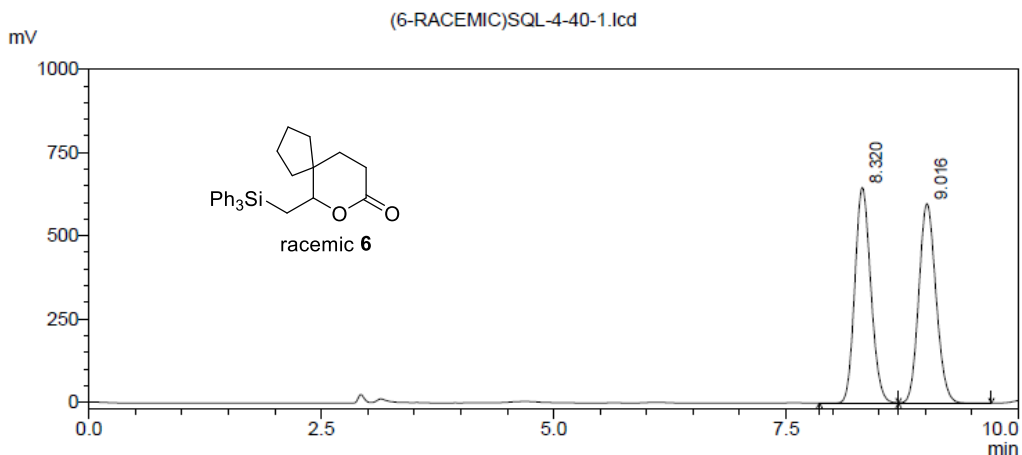

### <Data Analysis>

??A 214nm

| Pesk # | Ret. Time | Height  | Area     | Area%   |
|--------|-----------|---------|----------|---------|
| 1      | 8.320     | 647764  | 7744973  | 50.056  |
| 2      | 9.016     | 599142  | 7727609  | 49.944  |
| Total  |           | 1246906 | 15472582 | 100.000 |

## HPLC spectra of **6**

Data File : (6-CHIRAL)-RAM-2-303b.lcd  
 Method File : AD-H-95+5-1-214.lcm  
 Date Processed : 7/17/2021 10:08:47 AM

### <Chromatogram View>

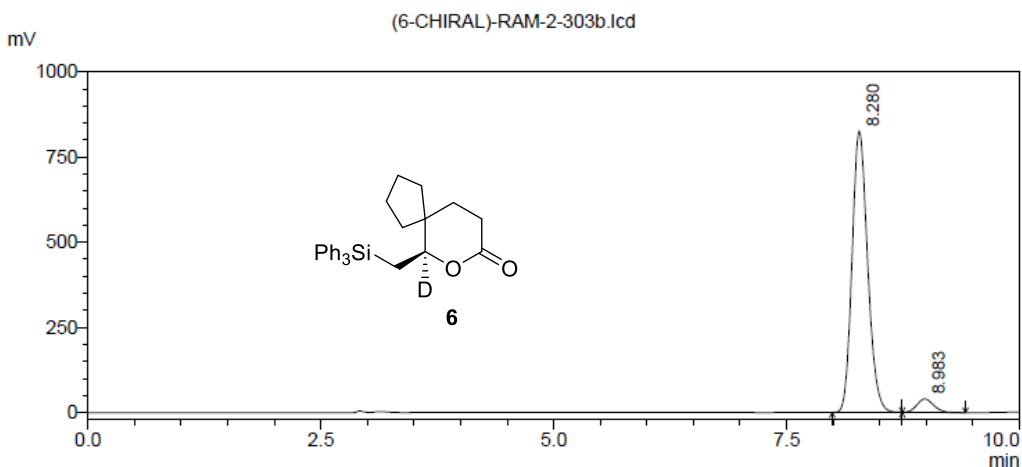

### <Data Analysis>

??A 214nm

| Pesk # | Ret. Time | Height | Area     | Area%   |
|--------|-----------|--------|----------|---------|
| 1      | 8.280     | 825721 | 9612403  | 95.051  |
| 2      | 8.983     | 39690  | 500435   | 4.949   |
| Total  |           | 865411 | 10112838 | 100.000 |

<sup>1</sup>H NMR spectra of **7**

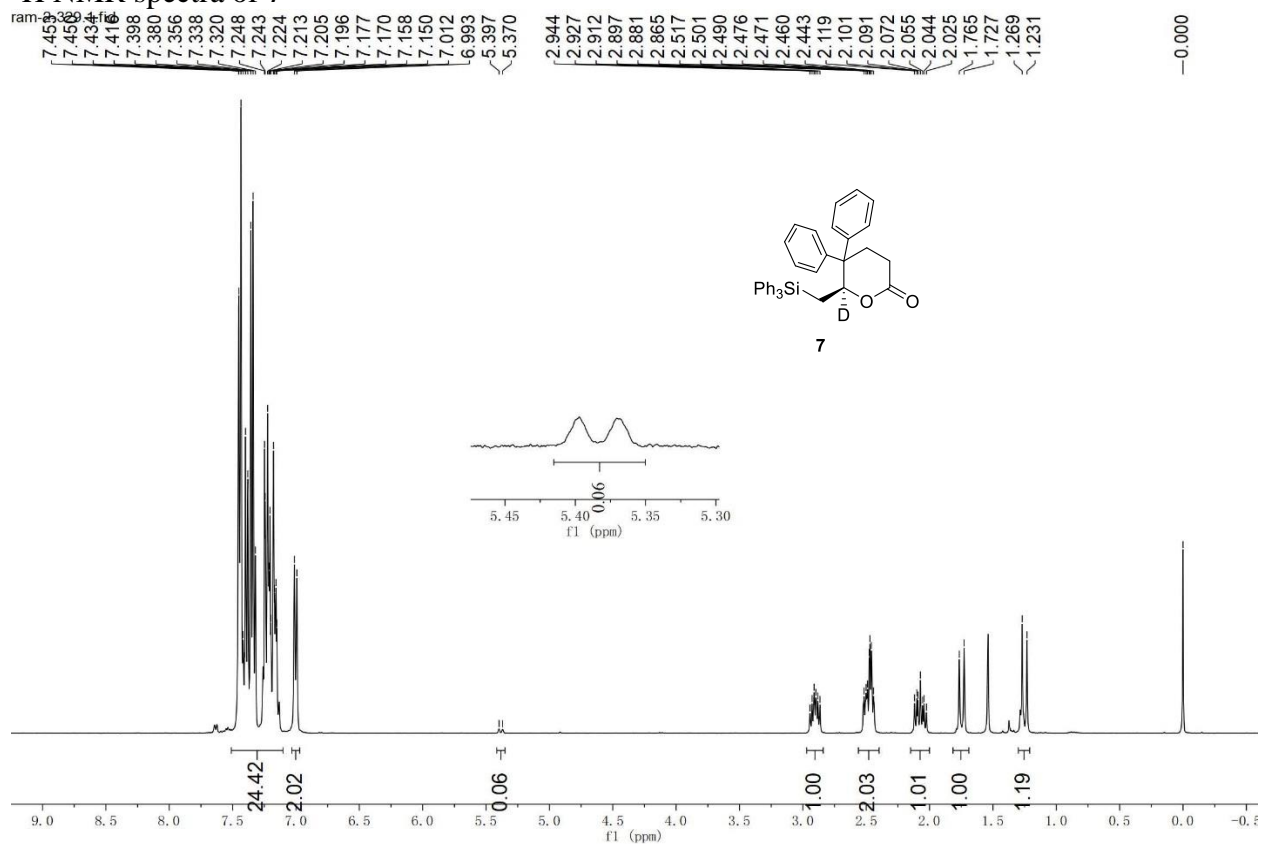

<sup>13</sup>C NMR spectra of **7**

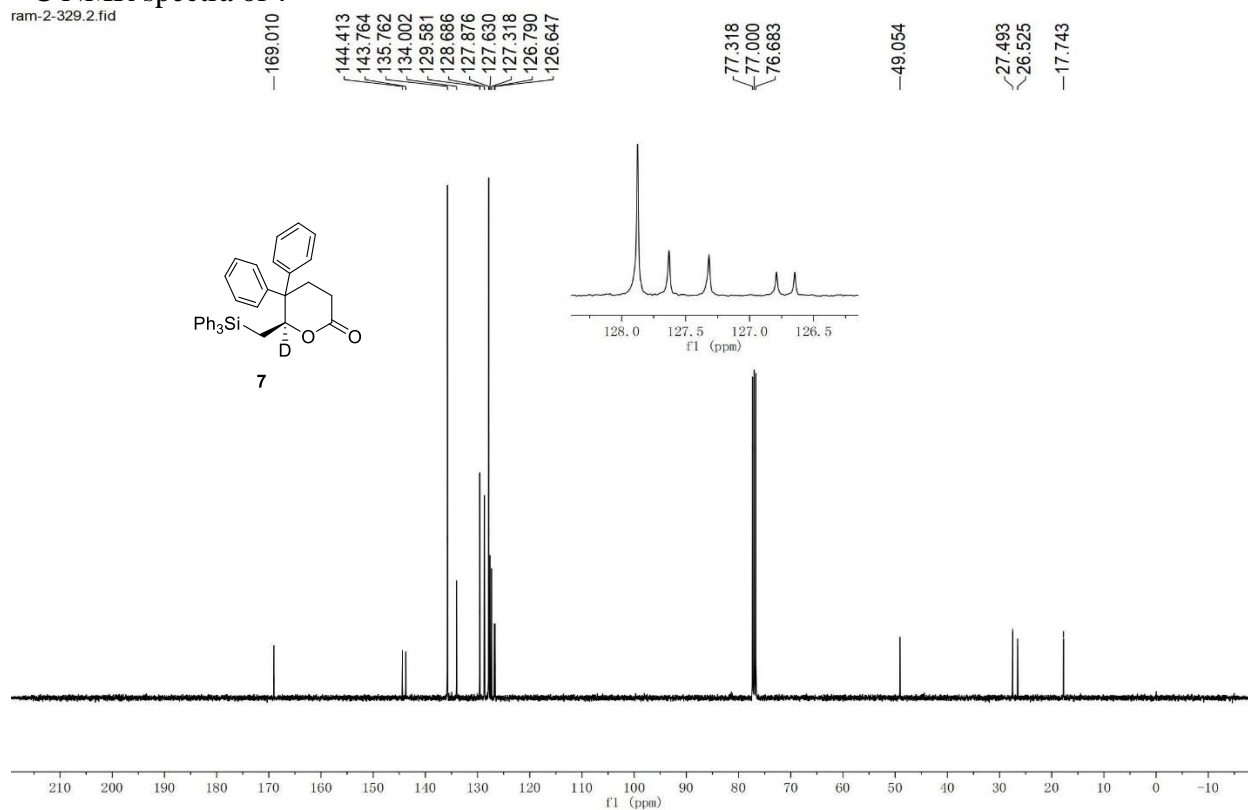

## HPLC spectra of racemic **7**

Data File : 7-RACEMIC-sql-5-151-1.lcd  
 Method File : 4OD-H-90-1-214-25min.lcm  
 Date Processed : 7/17/2021 10:14:25 AM

<Chromatogram View>

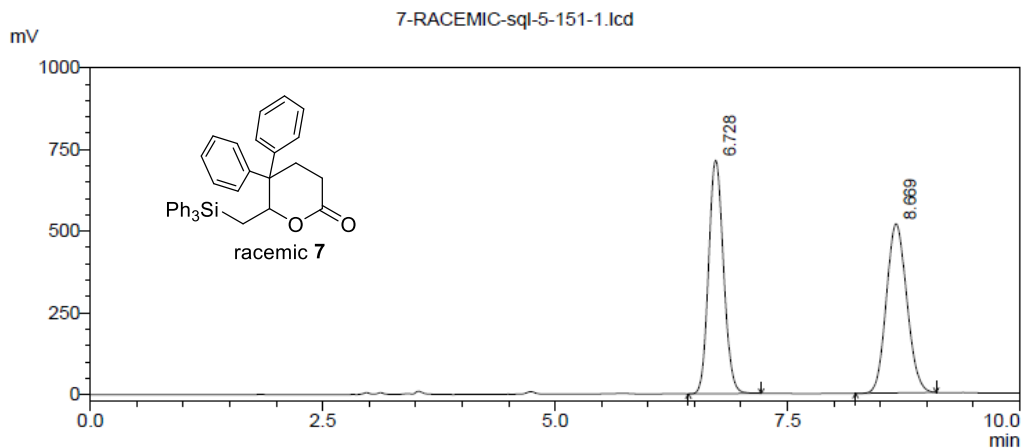

<Data Analysis>

| DetA 214nm |           |         |          |         |
|------------|-----------|---------|----------|---------|
| Pesk #     | Ret. Time | Height  | Area     | Area%   |
| 1          | 6.728     | 713735  | 7967917  | 50.091  |
| 2          | 8.669     | 517537  | 7938880  | 49.909  |
| Total      |           | 1231272 | 15906798 | 100.000 |

## HPLC spectra of **7**

Data File : 7-CHIRAL-ram-3-329-5.lcd  
 Method File : 4OD-H-90-1-214-25min.lcm  
 Date Processed : 7/17/2021 10:12:38 AM

<Chromatogram View>

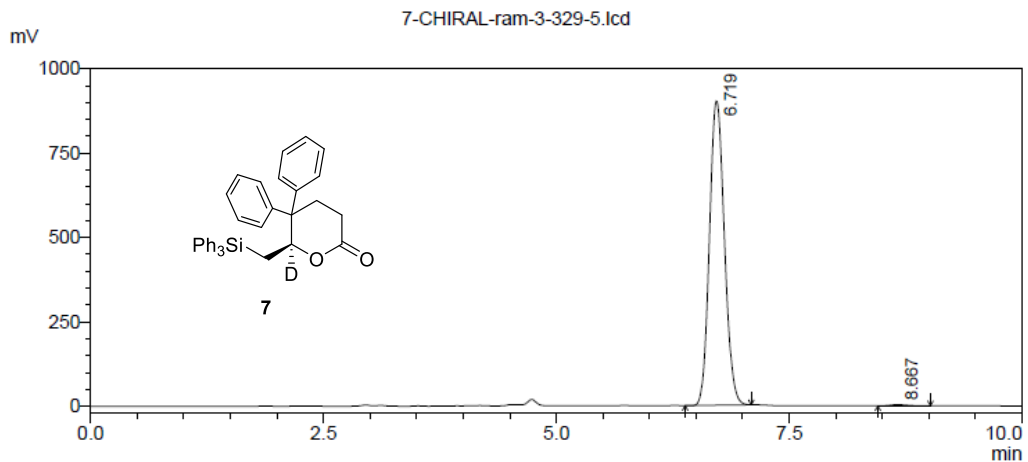

<Data Analysis>

| DetA 214nm |           |        |          |         |
|------------|-----------|--------|----------|---------|
| Pesk #     | Ret. Time | Height | Area     | Area%   |
| 1          | 6.719     | 901360 | 10060934 | 99.530  |
| 2          | 8.667     | 3086   | 47482    | 0.470   |
| Total      |           | 904446 | 10108417 | 100.000 |

<sup>1</sup>H NMR spectra of **8**

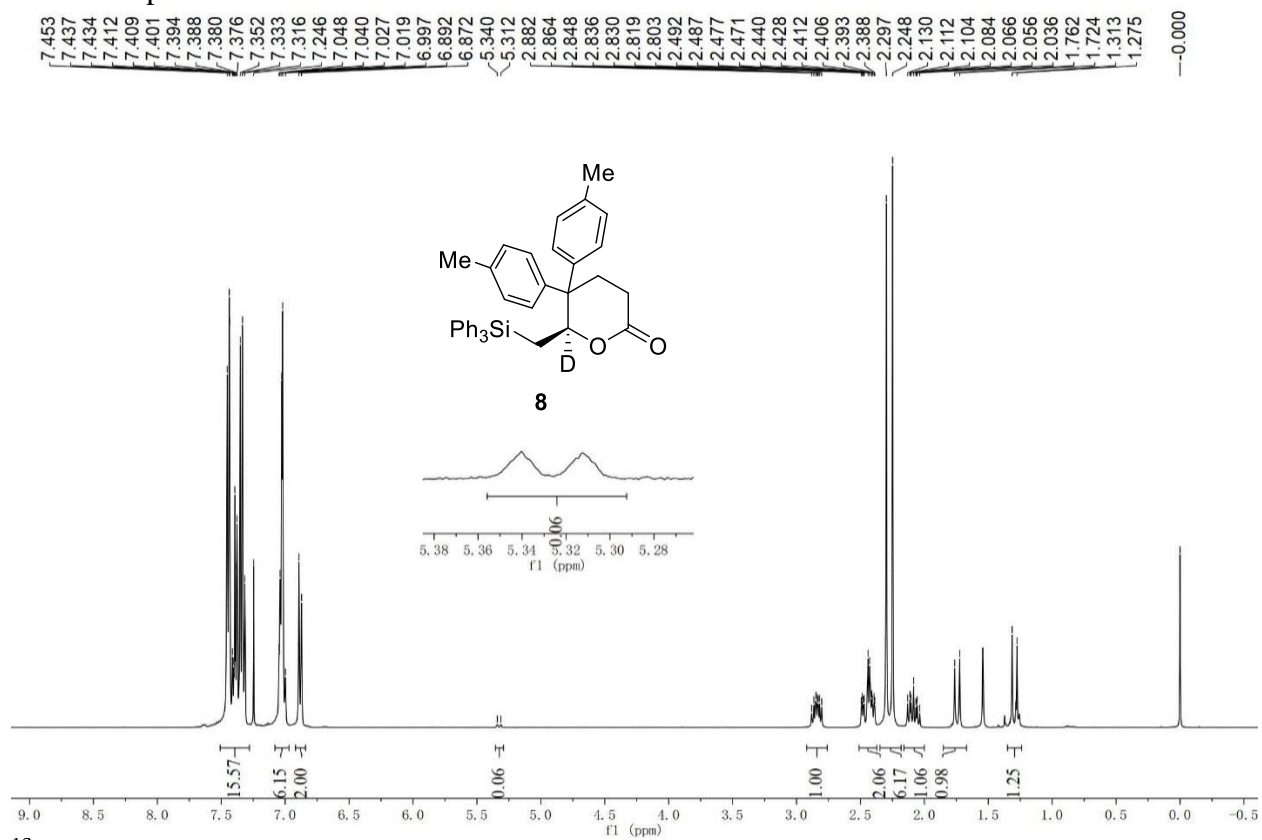

<sup>13</sup>C NMR spectra of **8**

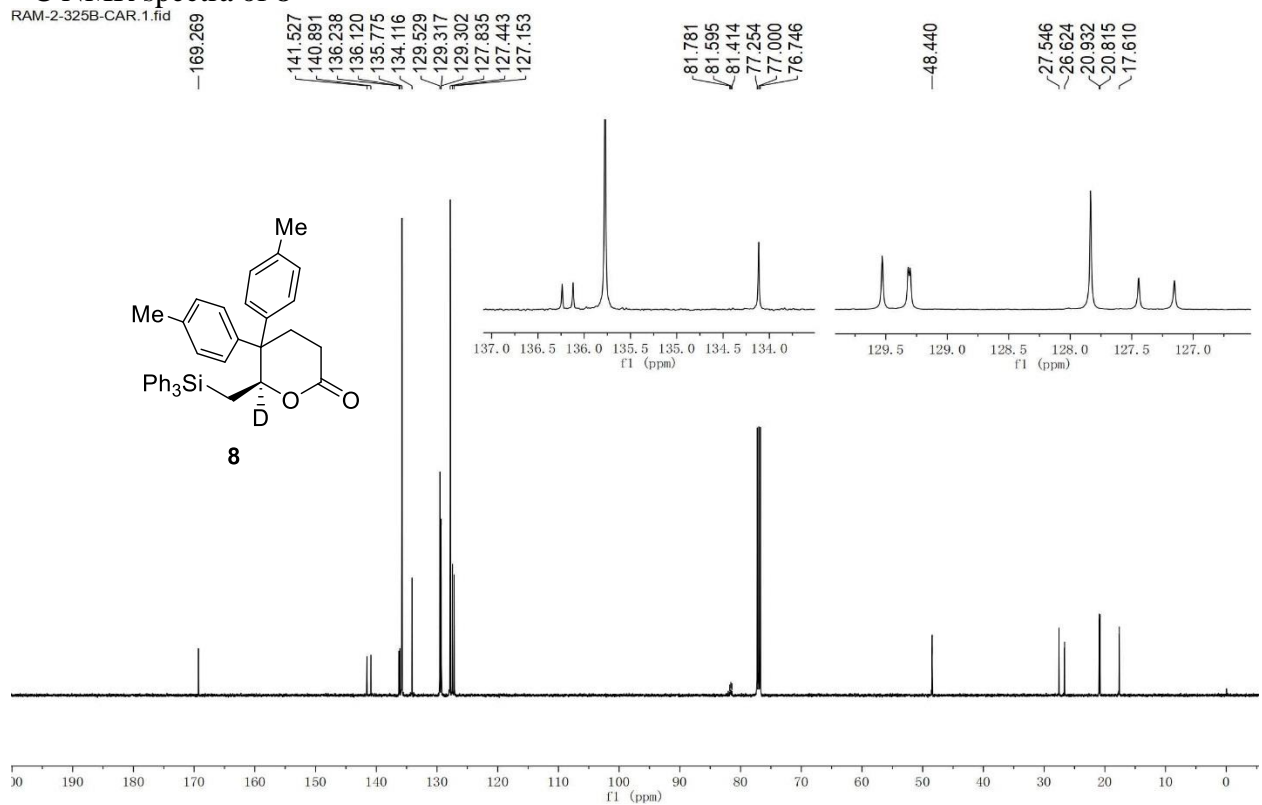

## HPLC spectra of racemic **8**

Data File : (8-RACEMIC)-RAM-2-325A-.lcd  
 Method File : OD-H-90+10-1-214.lcm  
 Date Processed : 7/17/2021 10:16:36 AM

<Chromatogram View>

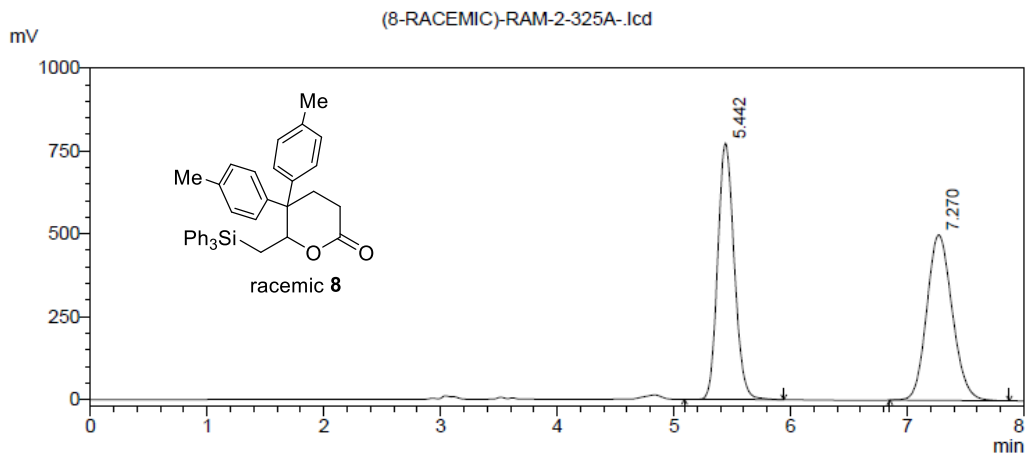

<Data Analysis>

??A 214nm

| Pesk # | Ret. Time | Height  | Area     | Area%   |
|--------|-----------|---------|----------|---------|
| 1      | 5.442     | 772563  | 7594788  | 50.044  |
| 2      | 7.270     | 499575  | 7581491  | 49.956  |
| Total  |           | 1272138 | 15176278 | 100.000 |

## HPLC spectra of **8**

Data File : (8-CHIRAL)RAM-2-325B-.lcd  
 Method File : OD-H-90+10-1-214.lcm  
 Date Processed : 7/17/2021 10:16:46 AM

<Chromatogram View>

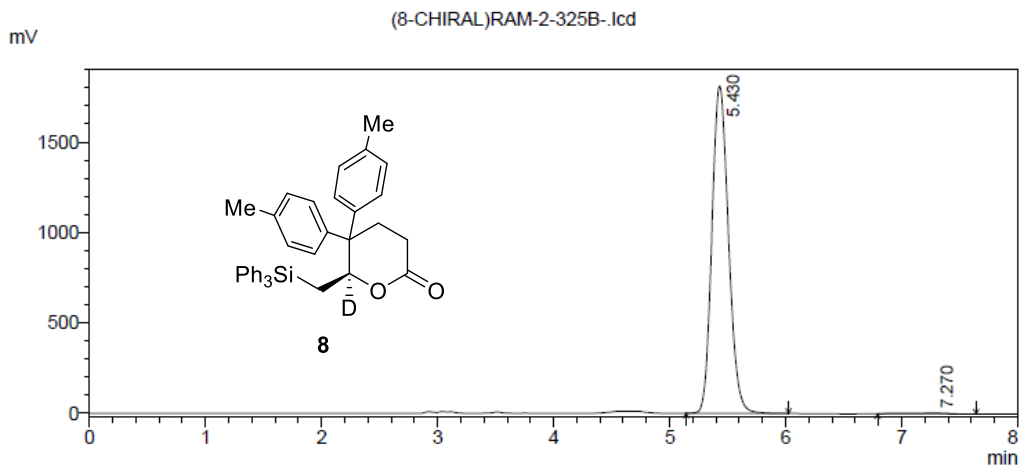

<Data Analysis>

??A 214nm

| Pesk # | Ret. Time | Height  | Area     | Area%   |
|--------|-----------|---------|----------|---------|
| 1      | 5.430     | 1808669 | 17984377 | 99.341  |
| 2      | 7.270     | 5719    | 119299   | 0.659   |
| Total  |           | 1814388 | 18103676 | 100.000 |



<sup>1</sup>H NMR spectra of **9**

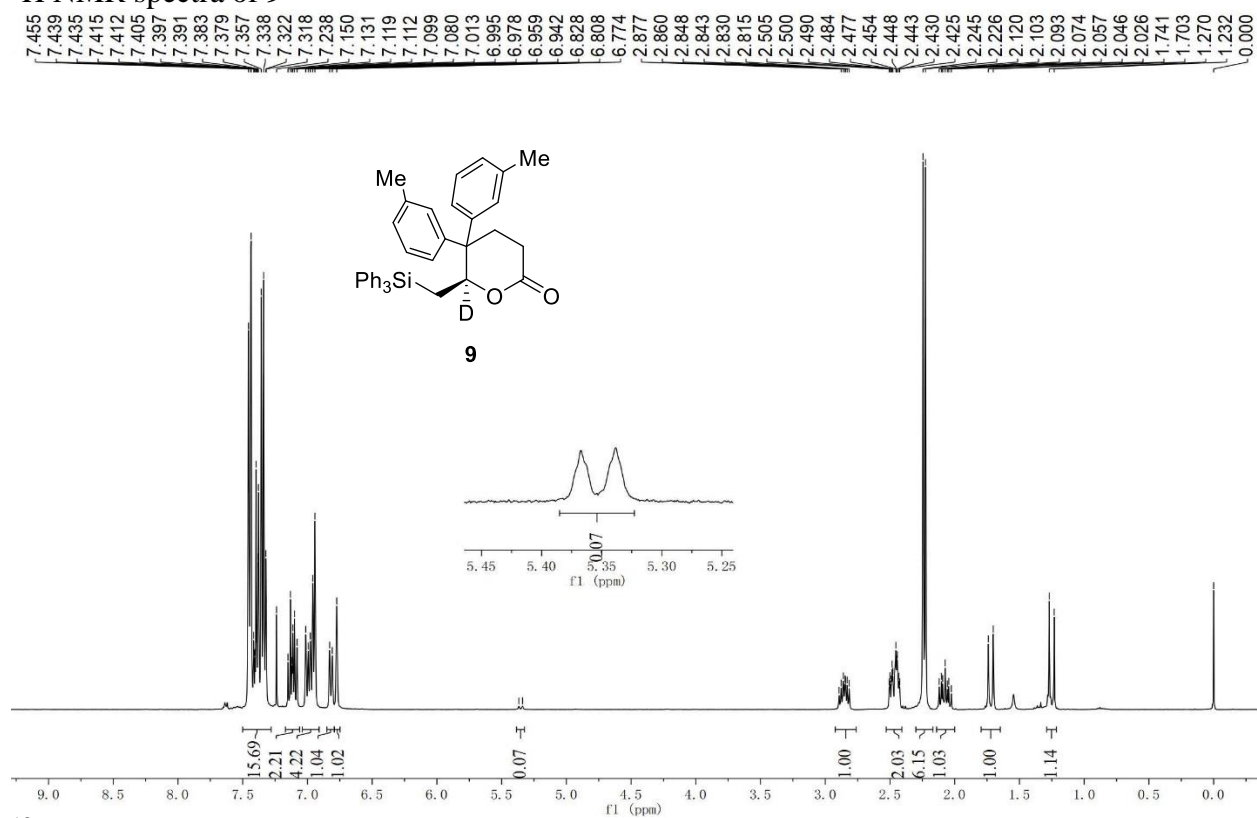

<sup>13</sup>C NMR spectra of **9**

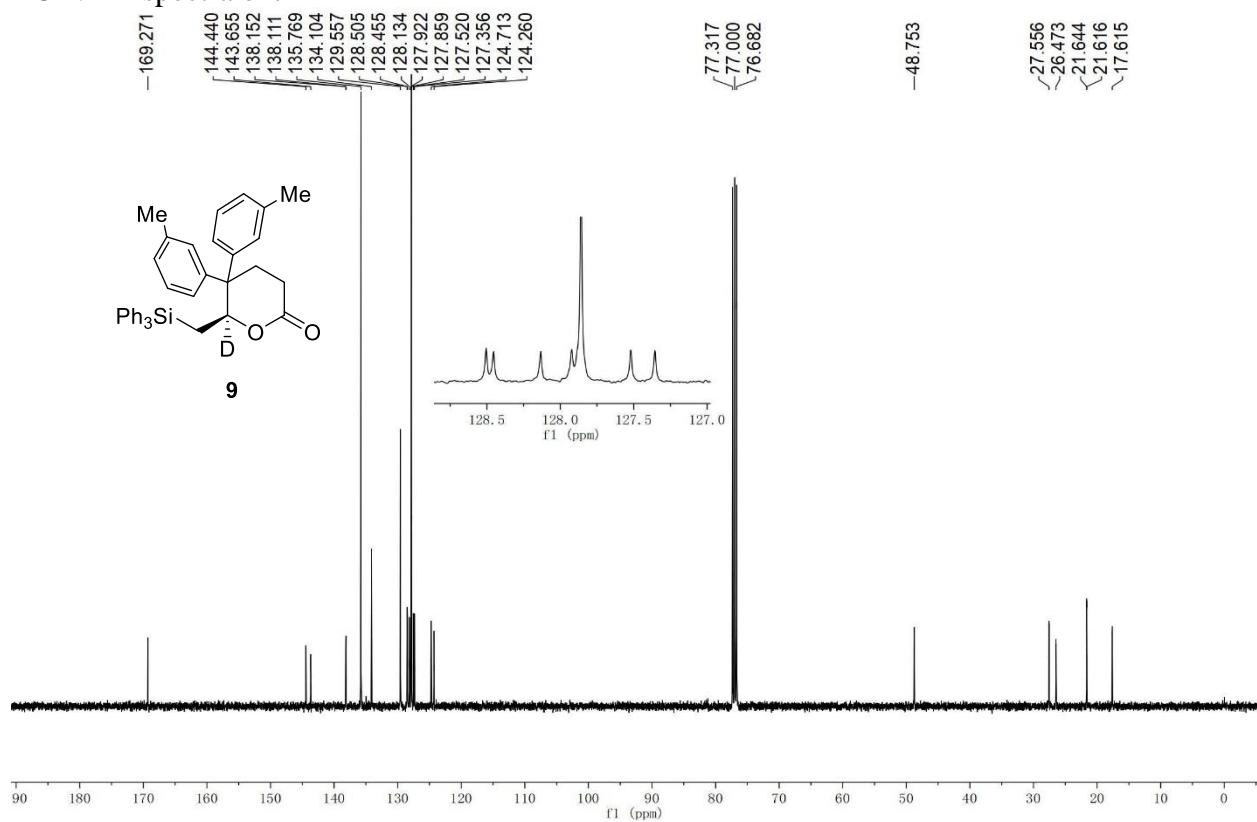

## HPLC spectra of racemic **9**

Data File : (9-RACEMIC)RAM-2-351A.lcd  
 Method File : OD-H-95+5-1-214.lcm  
 Date Processed : 7/17/2021 10:19:17 AM

<Chromatogram View>

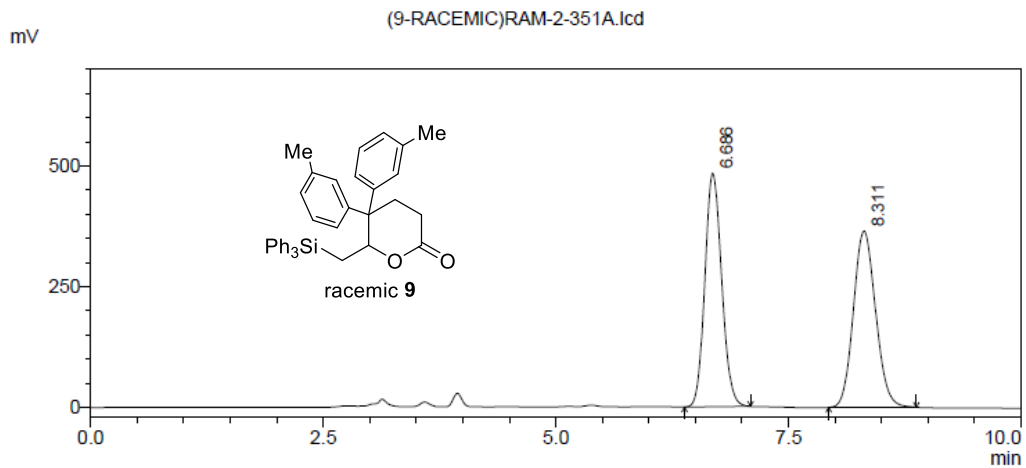

<Data Analysis>

??A 214nm

| Pesk # | Ret. Time | Height | Area     | Area%   |
|--------|-----------|--------|----------|---------|
| 1      | 6.686     | 482957 | 6070714  | 50.005  |
| 2      | 8.311     | 365025 | 6069473  | 49.995  |
| Total  |           | 847982 | 12140187 | 100.000 |

## HPLC spectra of **9**

Data File : (9-CHIRAL)RAM-2-351B.lcd  
 Method File : OD-H-95+5-1-214.lcm  
 Date Processed : 7/17/2021 10:19:05 AM

<Chromatogram View>

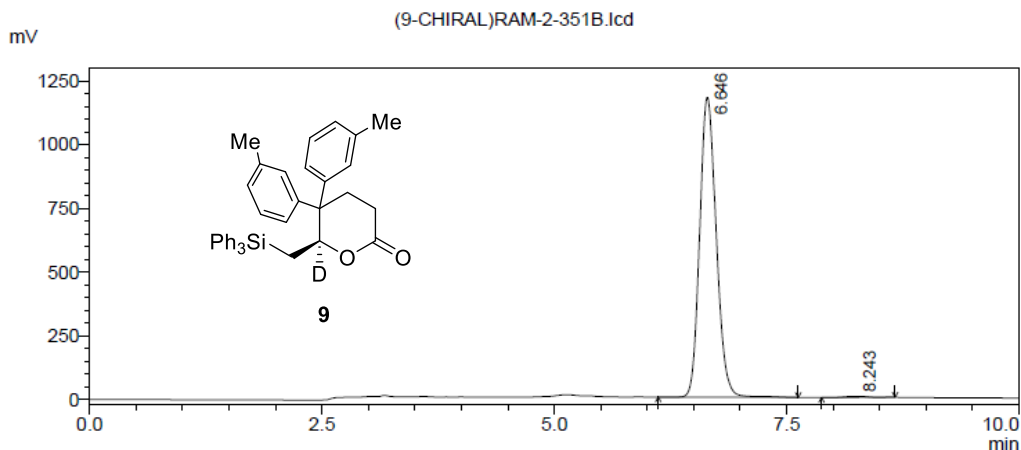

<Data Analysis>

??A 214nm

| Pesk # | Ret. Time | Height  | Area     | Area%   |
|--------|-----------|---------|----------|---------|
| 1      | 6.646     | 1176807 | 14651262 | 99.615  |
| 2      | 8.243     | 4199    | 56565    | 0.385   |
| Total  |           | 1181006 | 14707826 | 100.000 |

<sup>1</sup>H NMR spectra of **10**

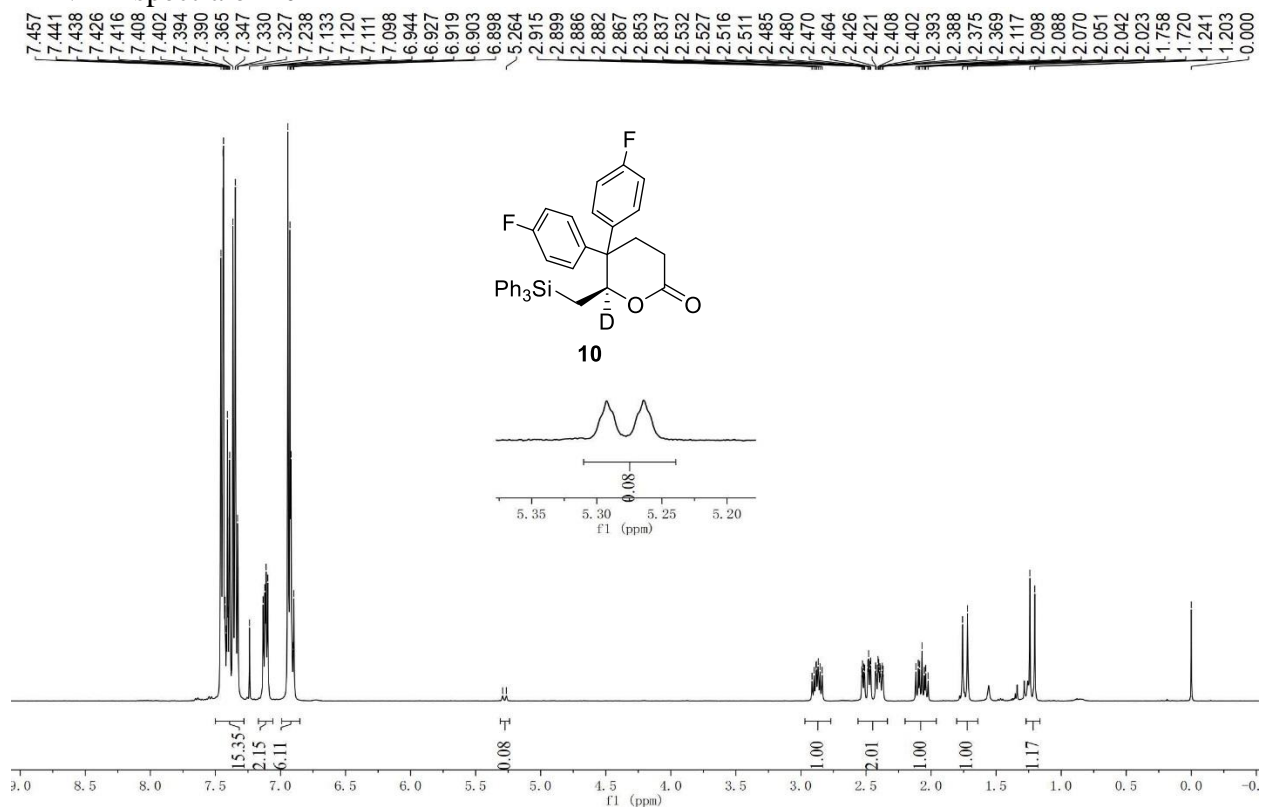

<sup>13</sup>C NMR spectra of **10**

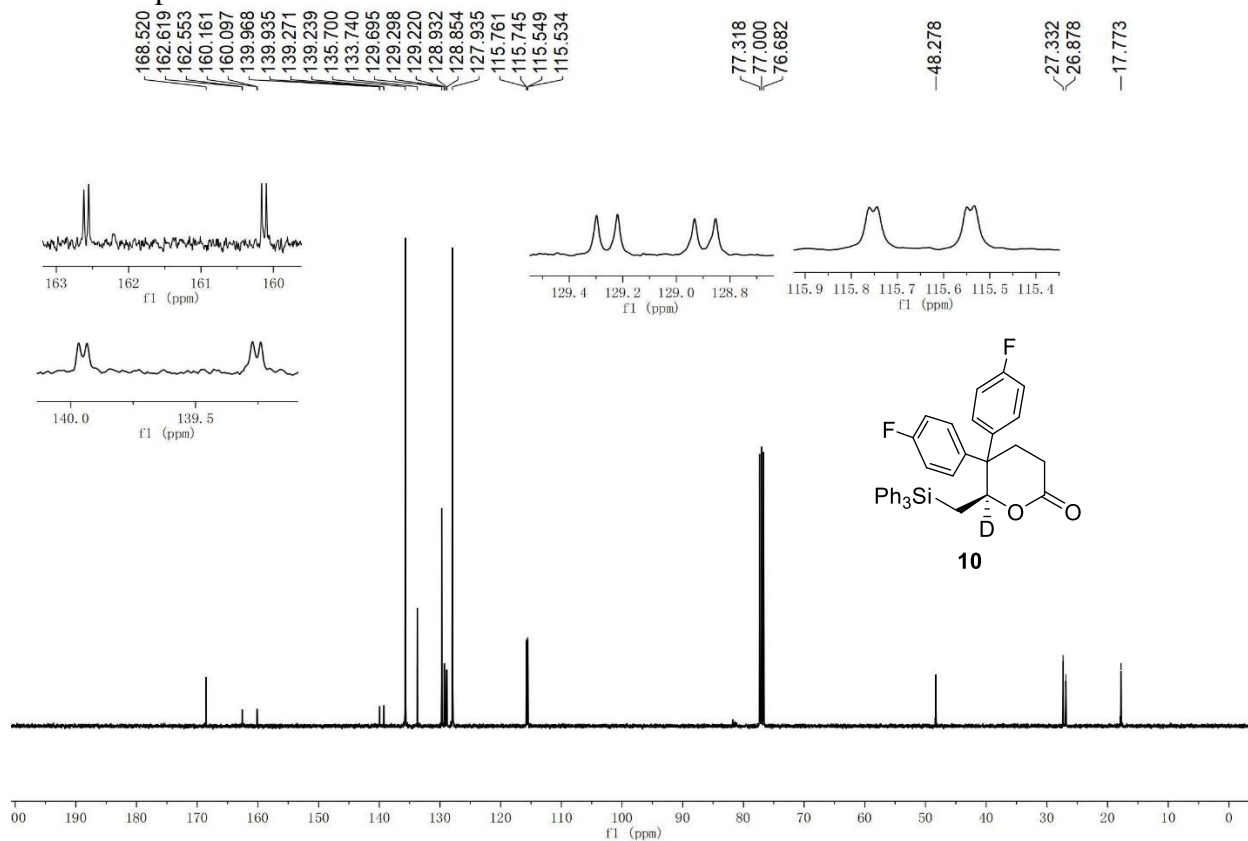

$^{19}\text{F}$  NMR spectra of **10**

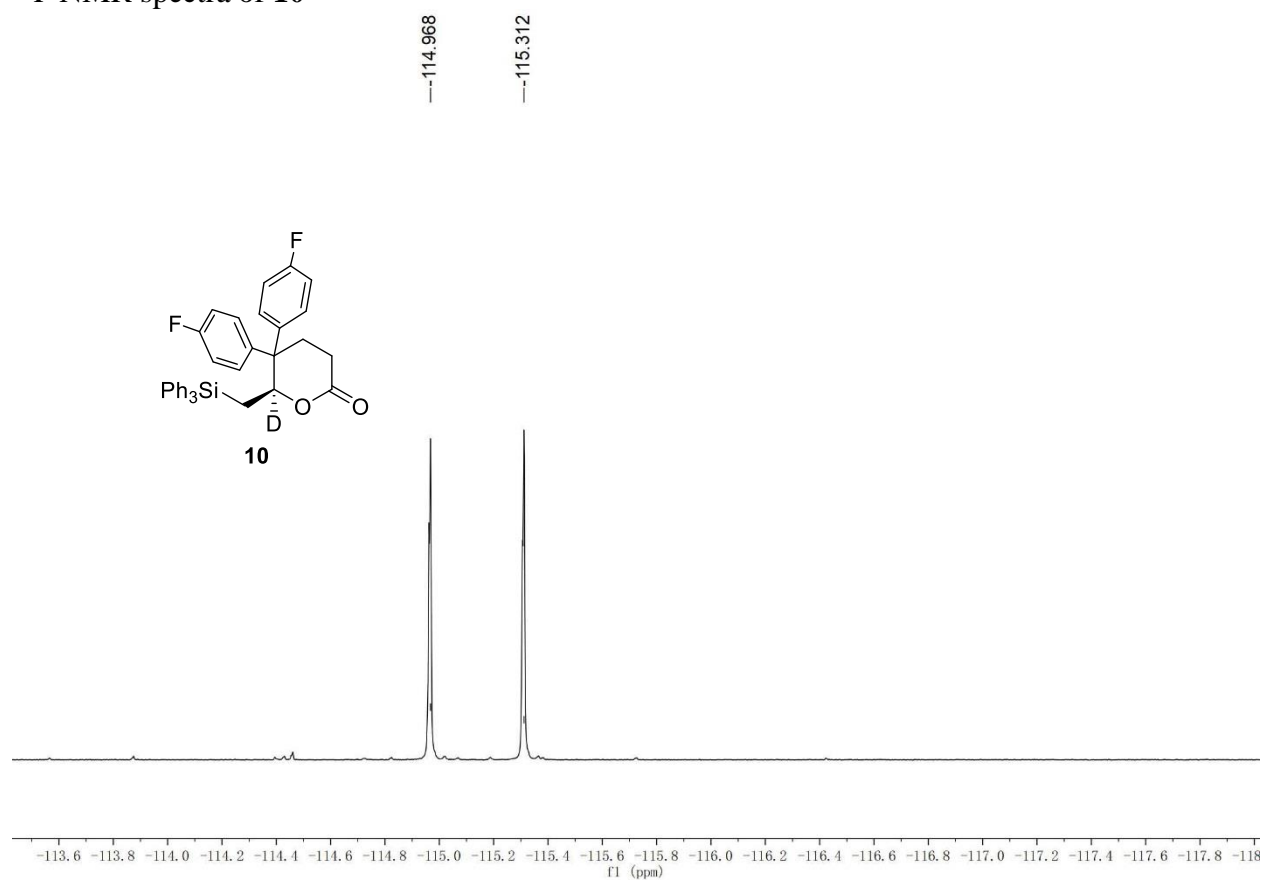

## HPLC spectra of **10**

Data File : (10-RACEMIC)RAM-2-358A.lcd  
 Method File : OD-H-95+5-1-214.lcm  
 Date Processed : 7/17/2021 10:21:35 AM

### <Chromatogram View>

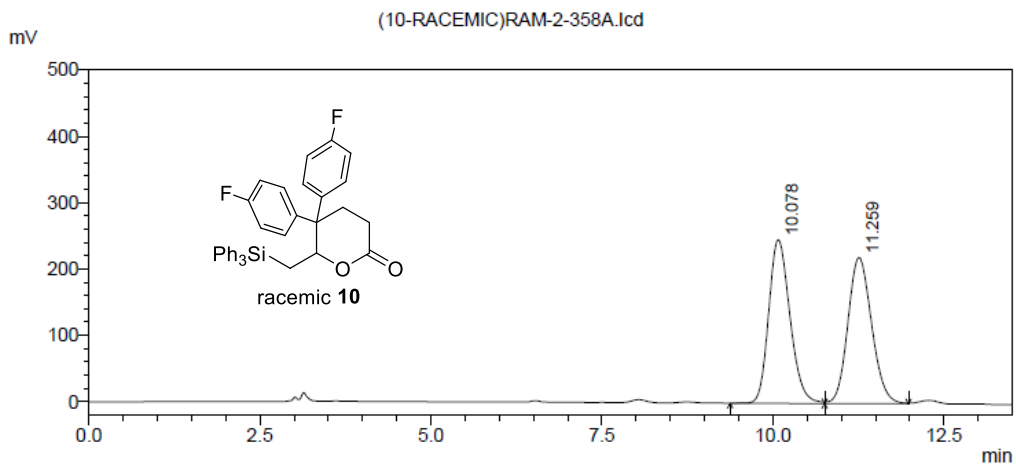

### <Data Analysis>

??A 214nm

| Pesk # | Ret. Time | Height | Area     | Area%   |
|--------|-----------|--------|----------|---------|
| 1      | 10.078    | 246512 | 5344265  | 50.043  |
| 2      | 11.259    | 220201 | 5335136  | 49.957  |
| Total  |           | 466712 | 10679401 | 100.000 |

## HPLC spectra of **10**

Data File : (10CHIRAL)RAM-2-358B.lcd  
 Method File : OD-H-95+5-1-214.lcm  
 Date Processed : 7/17/2021 10:21:47 AM

### <Chromatogram View>

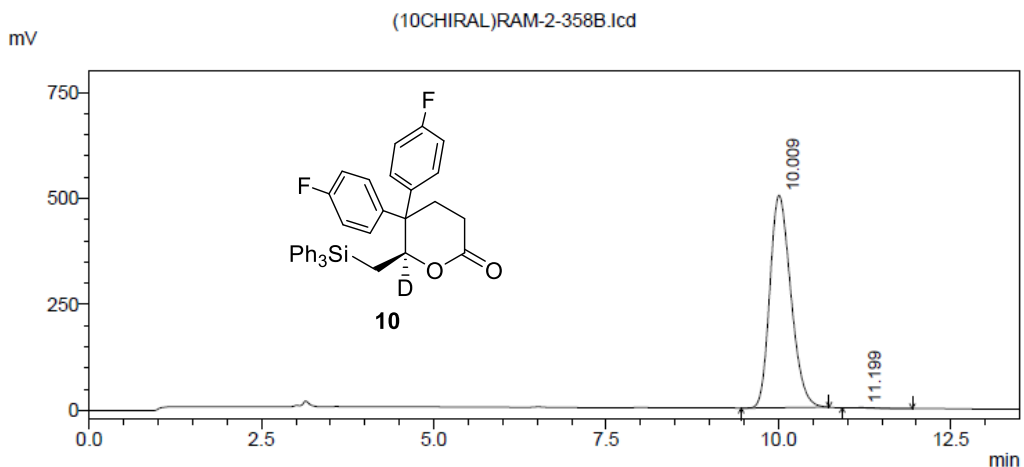

### <Data Analysis>

??A 214nm

| Pesk # | Ret. Time | Height | Area     | Area%   |
|--------|-----------|--------|----------|---------|
| 1      | 10.009    | 500339 | 10624159 | 99.854  |
| 2      | 11.199    | 1242   | 15501    | 0.146   |
| Total  |           | 501581 | 10639660 | 100.000 |

<sup>1</sup>H NMR spectra of **11**

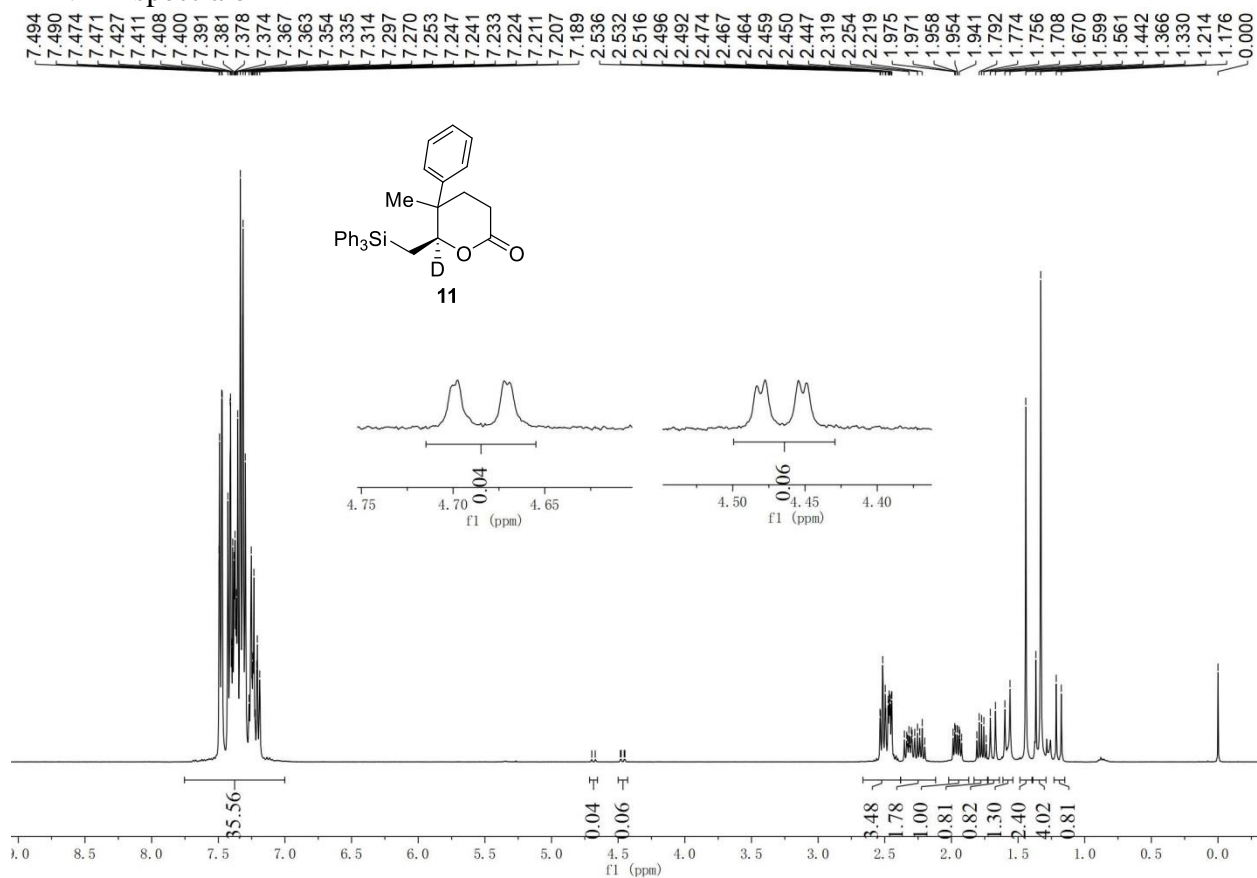

<sup>13</sup>C NMR spectra of **11**

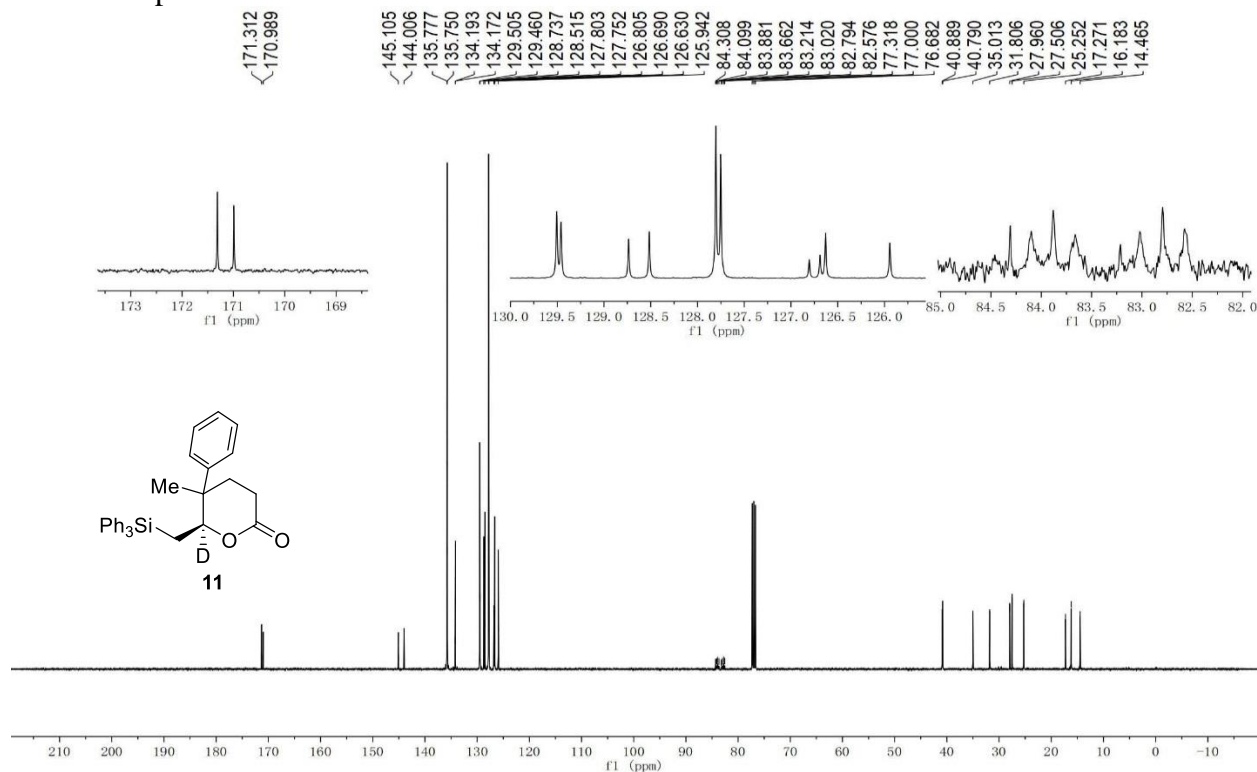

## HPLC spectra of racemic **11**

Data File : (11-RACEMIC)RAM-2-333-14.lcd  
 Method File : OD-H-99.8+0.2-1-214.lcm  
 Date Processed : 7/17/2021 10:40:16 AM

<Chromatogram View>

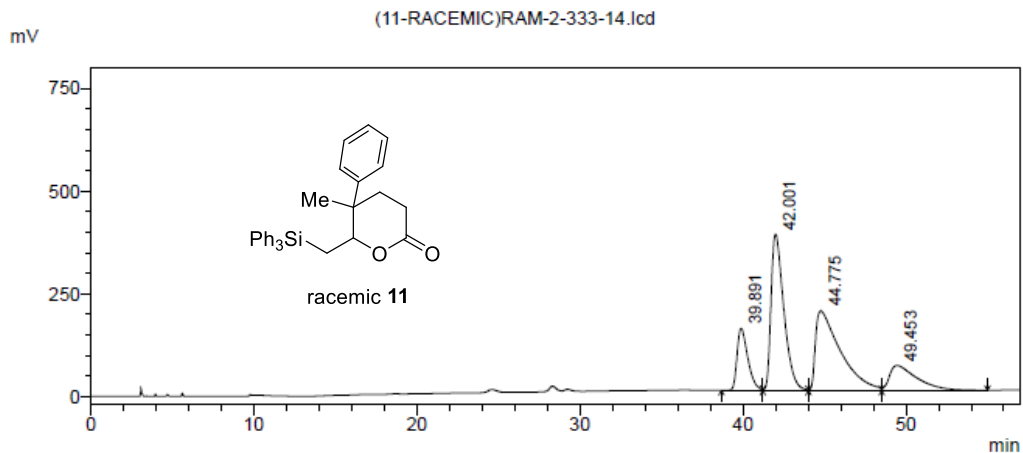

<Data Analysis>

??A 214nm

| Pesk # | Ret. Time | Height | Area     | Area%   |
|--------|-----------|--------|----------|---------|
| 1      | 39.891    | 151132 | 6928347  | 12.538  |
| 2      | 42.001    | 380291 | 20723219 | 37.502  |
| 3      | 44.775    | 193375 | 20463404 | 37.032  |
| 4      | 49.453    | 60734  | 7143272  | 12.927  |
| Total  |           | 785532 | 55258241 | 100.000 |

## HPLC spectra of **11**

Data File : (11-CHIRAL)RAM-2-334.lcd  
 Method File : OD-H-99.8+0.2-1-214.lcm  
 Date Processed : 7/17/2021 10:39:48 AM

<Chromatogram View>

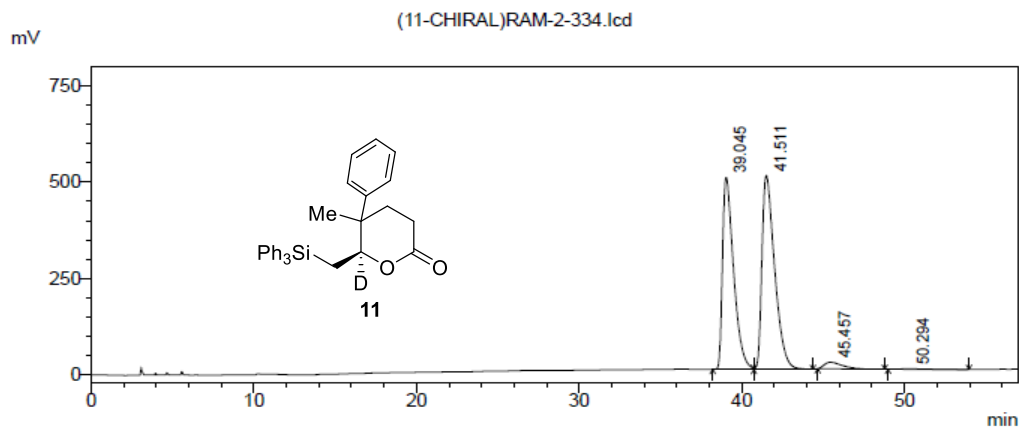

<Data Analysis>

??A 214nm

| Pesk # | Ret. Time | Height  | Area     | Area%   |
|--------|-----------|---------|----------|---------|
| 1      | 39.045    | 498683  | 23579308 | 44.991  |
| 2      | 41.511    | 503531  | 27352841 | 52.191  |
| 3      | 45.457    | 17154   | 1330742  | 2.539   |
| 4      | 50.294    | 1659    | 145863   | 0.278   |
| Total  |           | 1021026 | 52408754 | 100.000 |

# <sup>1</sup>H NMR spectra of 12

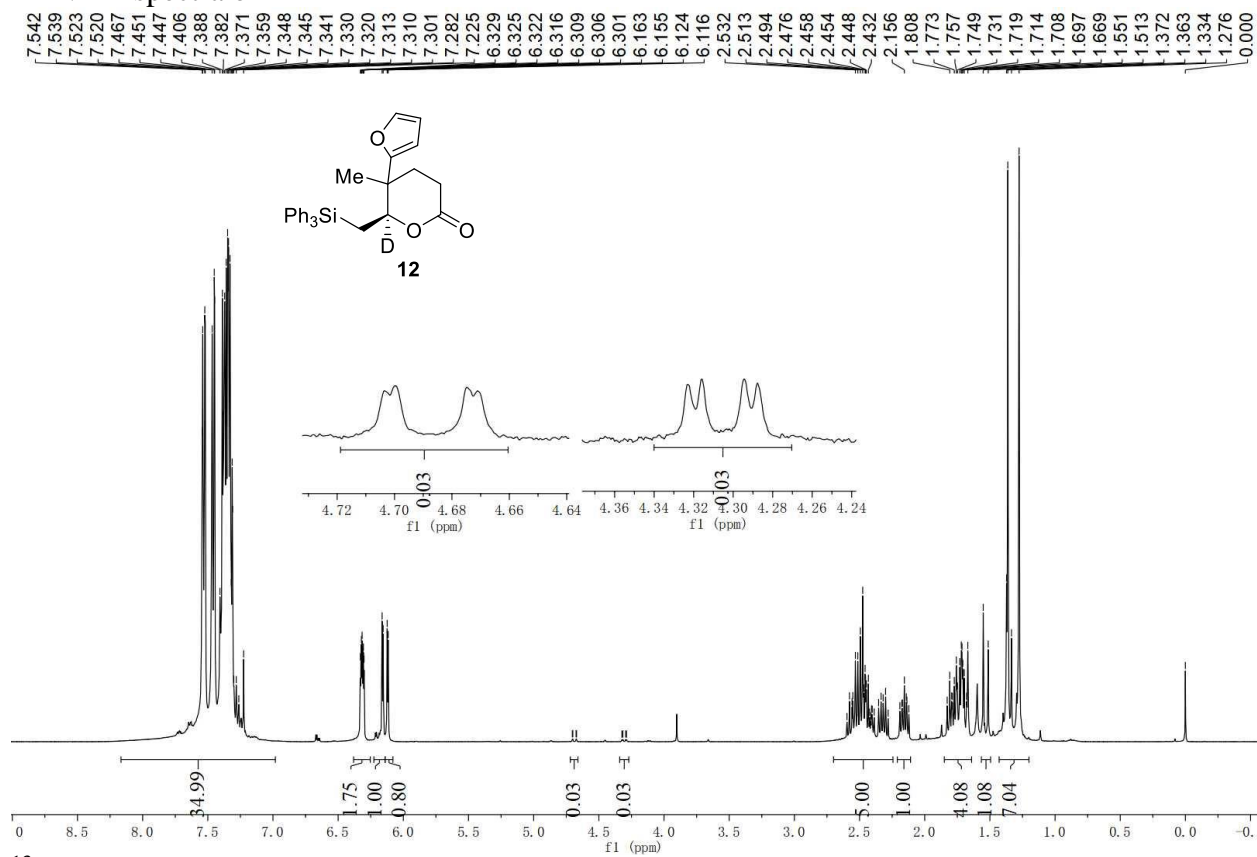

# <sup>13</sup>C NMR spectra of 12

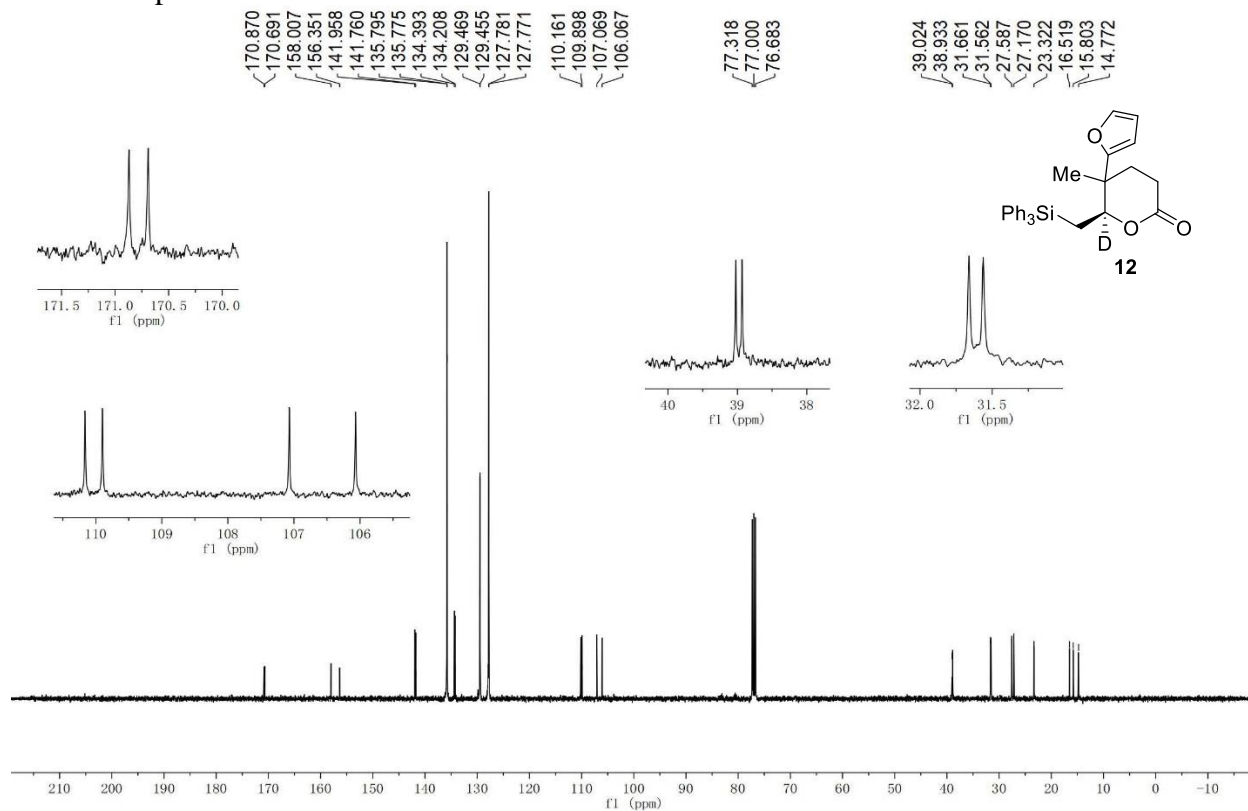



## HPLC spectra of racemic **12**

Data File : 12-RACEMIC-RAM-3-29-18.lcd  
 Method File : 3AD-H-99 2-1-214-70min.lcm  
 Date Processed : 7/17/2021 10:45:55 AM

<Chromatogram View>

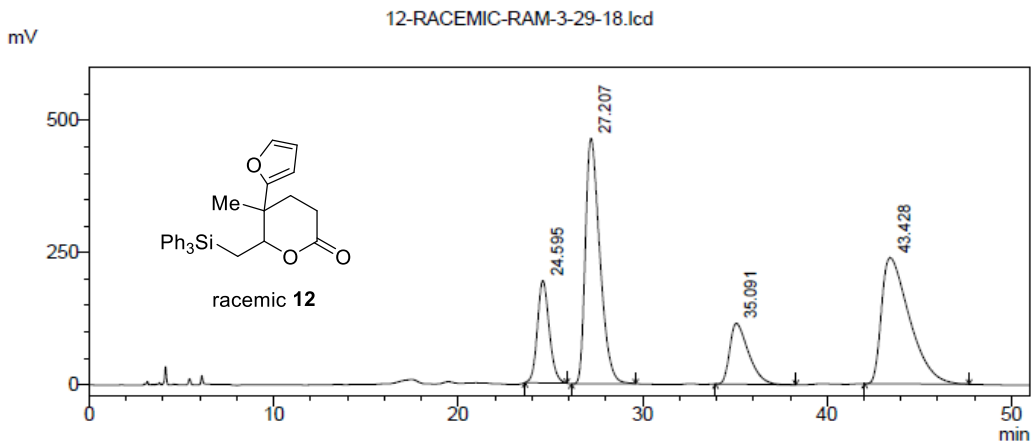

<Data Analysis>

| DetA 214nm |           |         |          |         |
|------------|-----------|---------|----------|---------|
| Peak #     | Ret. Time | Height  | Area     | Area%   |
| 1          | 24.595    | 193515  | 8631303  | 12.842  |
| 2          | 27.207    | 464004  | 25184564 | 37.470  |
| 3          | 35.091    | 114962  | 8197243  | 12.196  |
| 4          | 43.428    | 237962  | 25199969 | 37.493  |
| Total      |           | 1010442 | 67213080 | 100.000 |

## HPLC spectra of **12**

Data File : 12-CHIRAL-RAM-3-187-2--12.lcd  
 Method File : 3AD-H-99 2-1-214-70min.lcm  
 Date Processed : 7/17/2021 10:46:20 AM

<Chromatogram View>

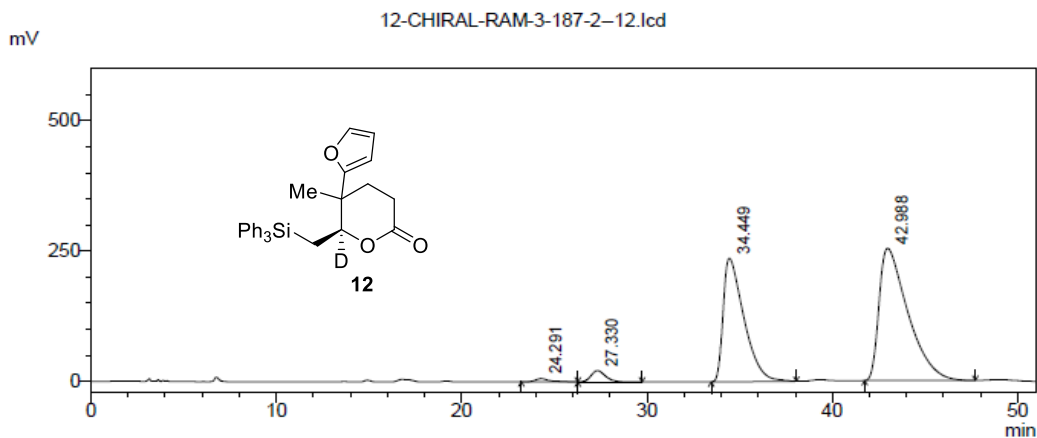

<Data Analysis>

| DetA 214nm |           |        |          |         |
|------------|-----------|--------|----------|---------|
| Peak #     | Ret. Time | Height | Area     | Area%   |
| 1          | 24.291    | 6344   | 331920   | 0.701   |
| 2          | 27.330    | 21661  | 1167809  | 2.467   |
| 3          | 34.449    | 236801 | 18442371 | 38.966  |
| 4          | 42.988    | 253076 | 27386737 | 57.865  |
| Total      |           | 517882 | 47328837 | 100.000 |

# <sup>1</sup>H NMR spectra of **13**

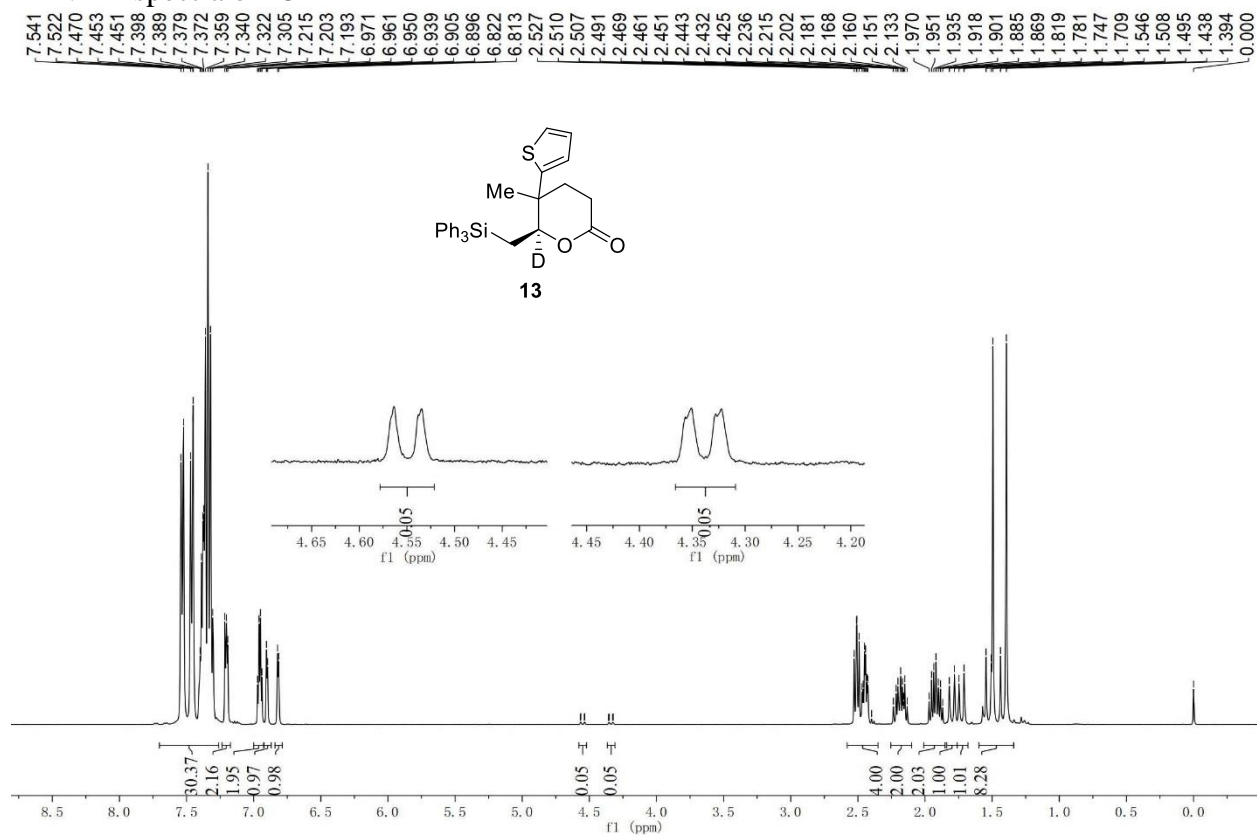

# <sup>13</sup>C NMR spectra of **13**

ram-3-69carbon.1.fid

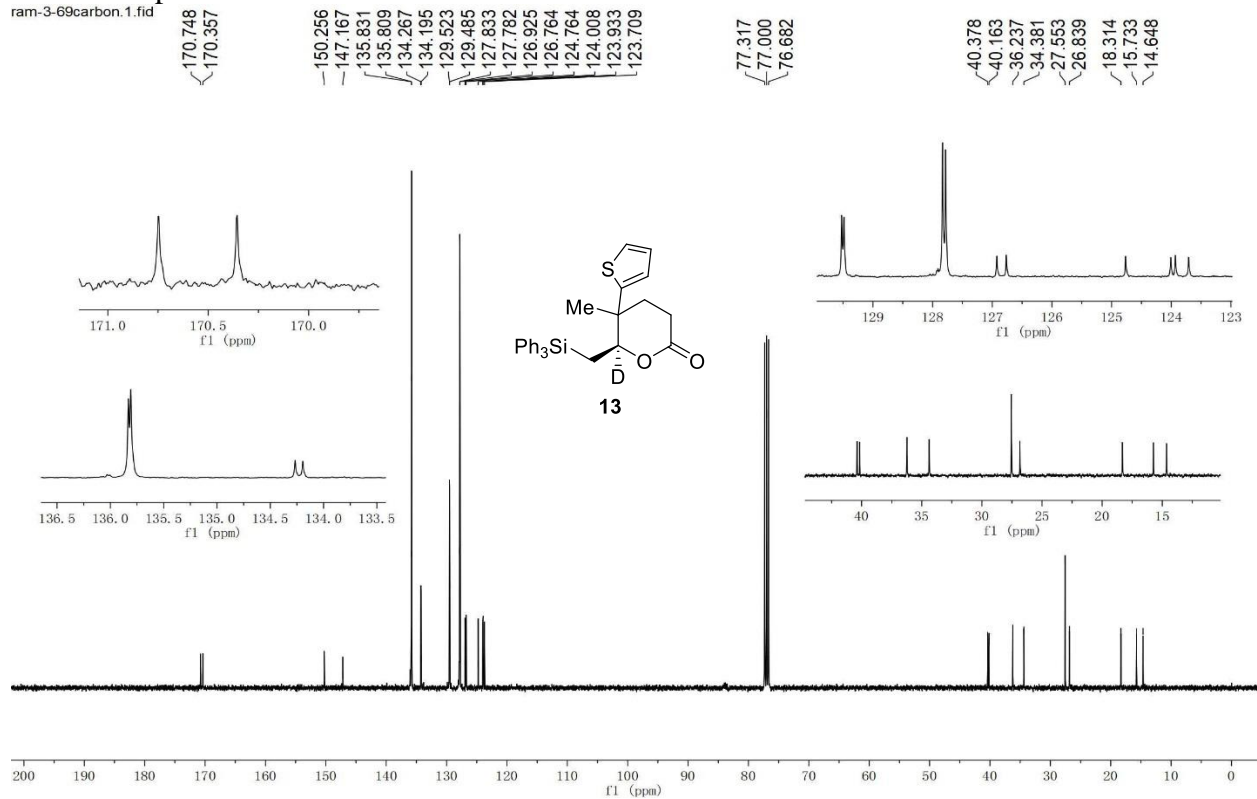

## HPLC spectra of racemic **13**

<色谱图>

mAU

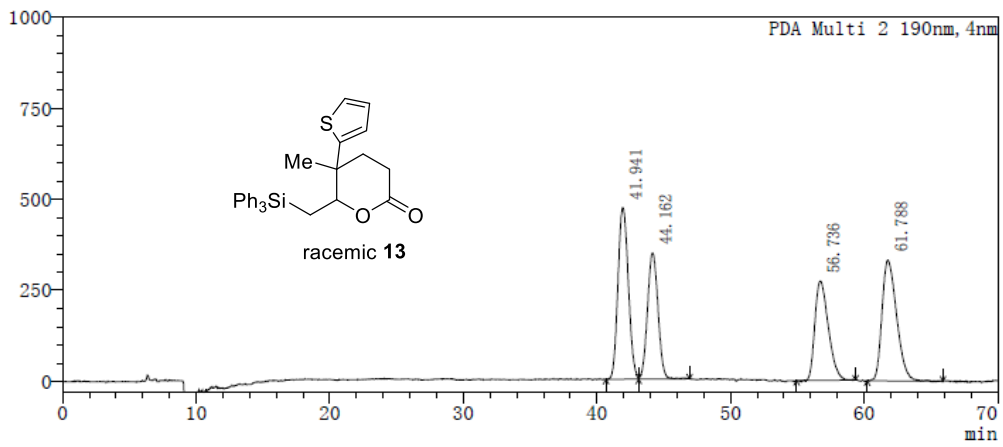

| Peak | Time   | Area     | Area%   |
|------|--------|----------|---------|
| 1    | 41.941 | 25423282 | 28.696  |
| 2    | 44.162 | 18971098 | 21.414  |
| 3    | 56.736 | 19054884 | 21.508  |
| 4    | 61.788 | 25144819 | 28.382  |
| 总计   |        | 88594083 | 100.000 |

## HPLC spectra of **13**

<色谱图>

mAU

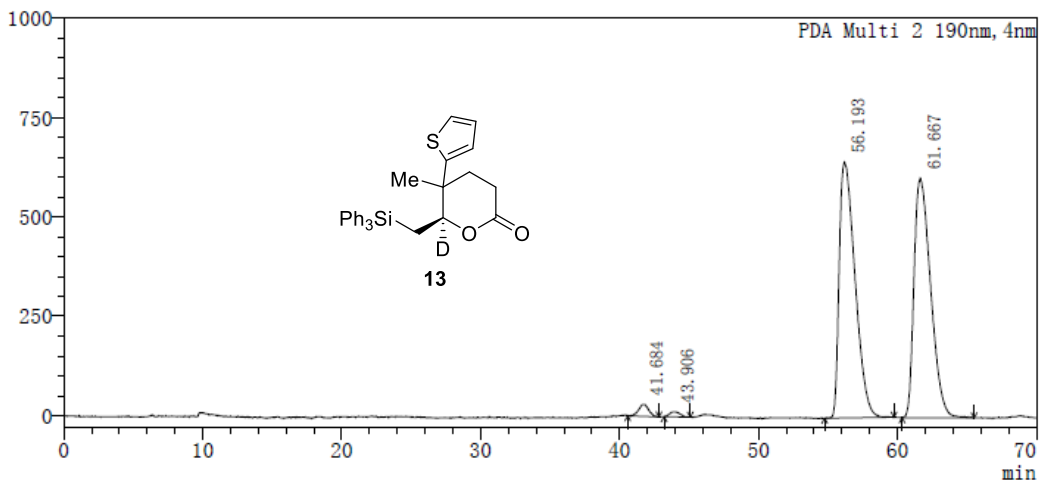

| Peak | Time   | Area      | Area%   |
|------|--------|-----------|---------|
| 1    | 41.684 | 1509831   | 1.464   |
| 2    | 43.906 | 651099    | 0.631   |
| 3    | 56.193 | 50874603  | 49.331  |
| 4    | 61.667 | 50094479  | 48.574  |
| 总计   |        | 103130012 | 100.000 |

# <sup>1</sup>H NMR spectra of 14

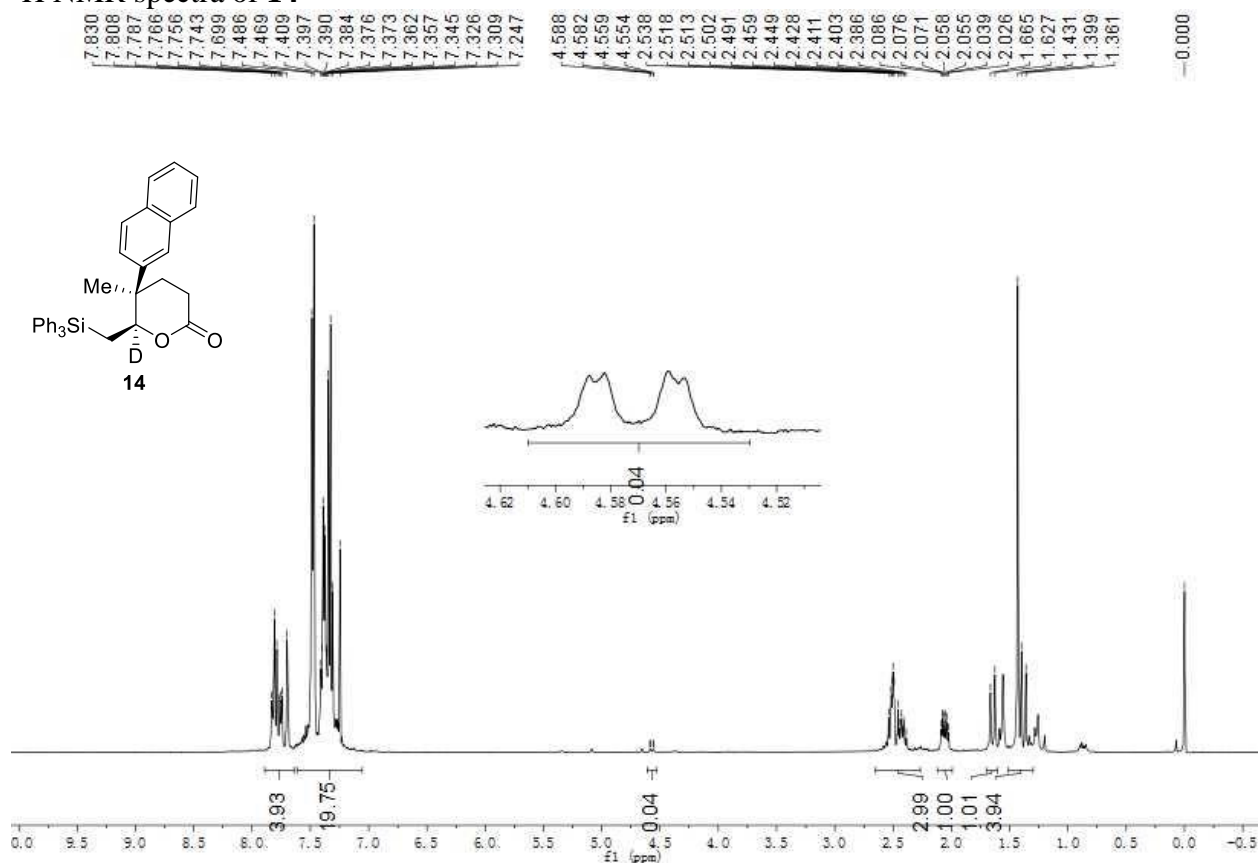

# <sup>13</sup>C NMR spectra of 14

sql-5-73-carbon.21.fid

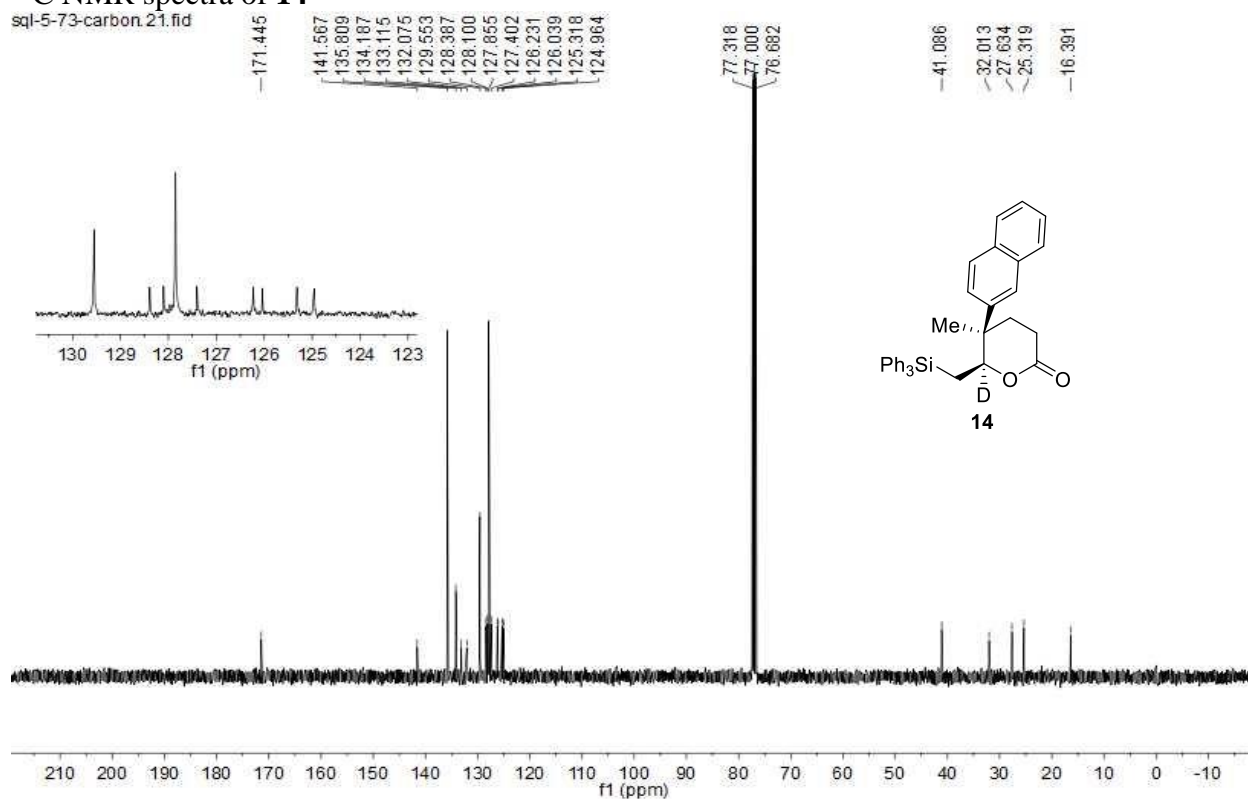

## HPLC spectra of racemic **14**

<色谱图>

mAU

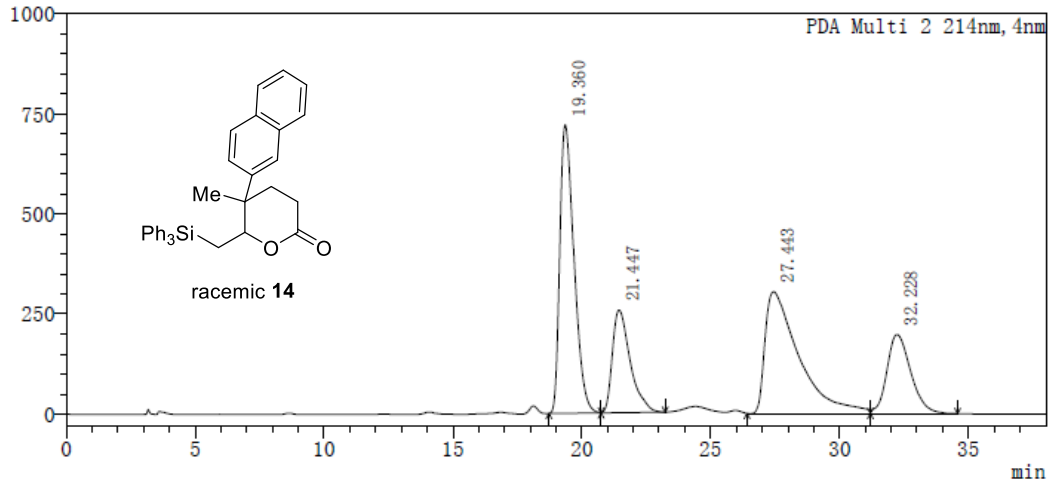

| Peak | Time   | Area     | Area%   |
|------|--------|----------|---------|
| 1    | 19.360 | 27626820 | 34.357  |
| 2    | 21.447 | 12308026 | 15.306  |
| 3    | 27.443 | 27798281 | 34.570  |
| 4    | 32.228 | 12677954 | 15.766  |
| 总计   |        | 80411080 | 100.000 |

## HPLC spectra of **14**

<色谱图>

mAU

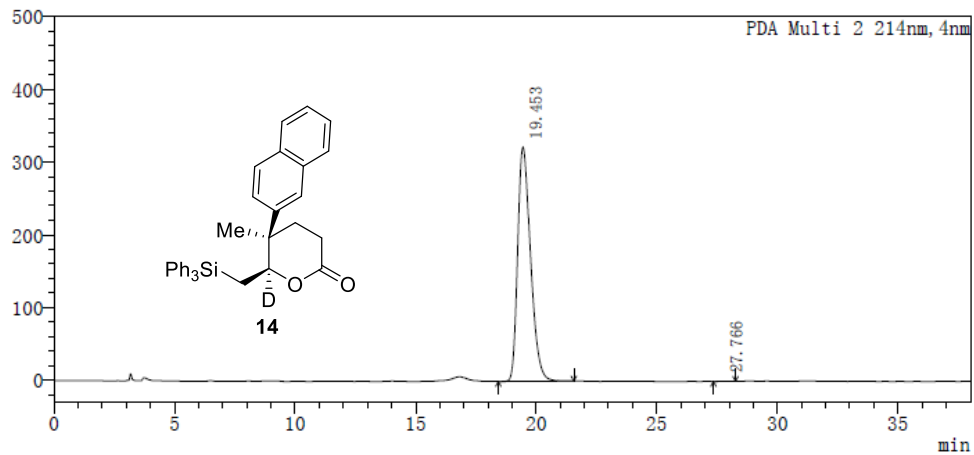

| Peak | Time   | Area     | Area%   |
|------|--------|----------|---------|
| 1    | 19.453 | 11932801 | 99.941  |
| 2    | 27.766 | 7053     | 0.059   |
| 总计   |        | 11939854 | 100.000 |

<sup>1</sup>H NMR spectra of 15

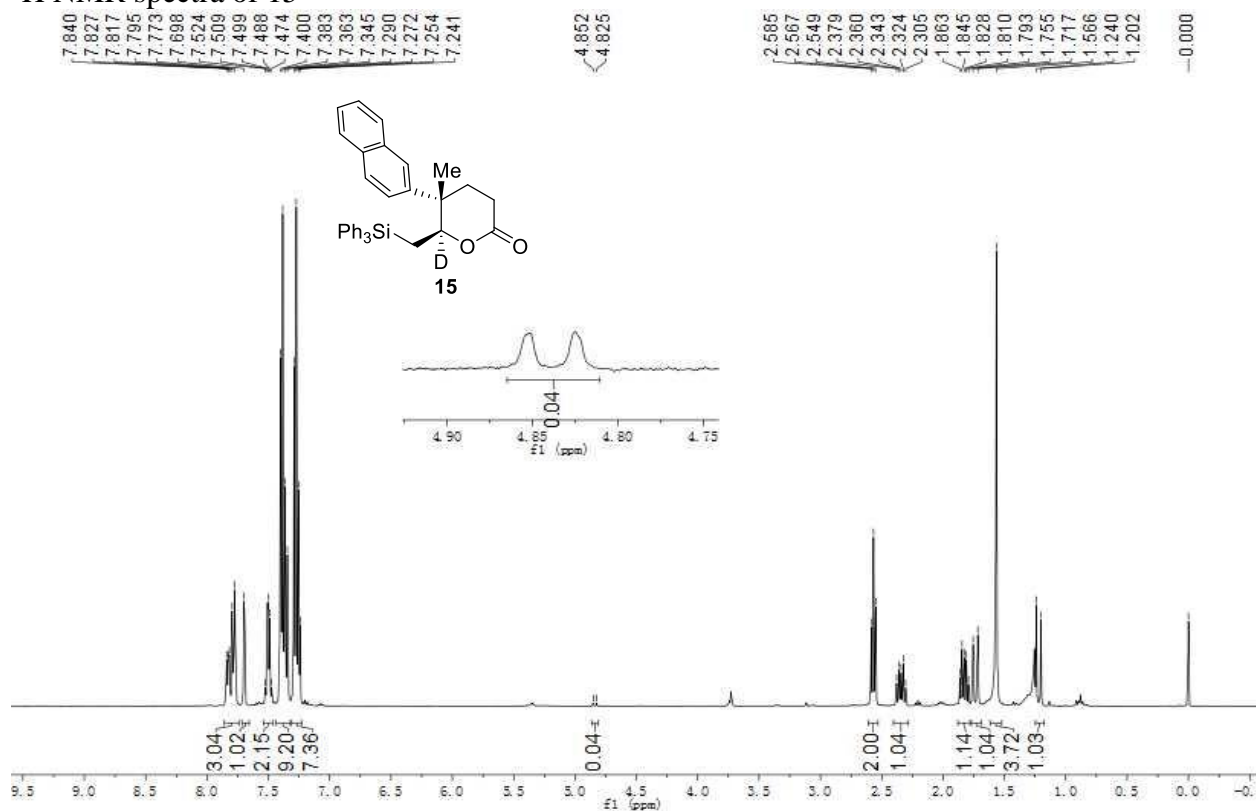

<sup>13</sup>C NMR spectra of 15

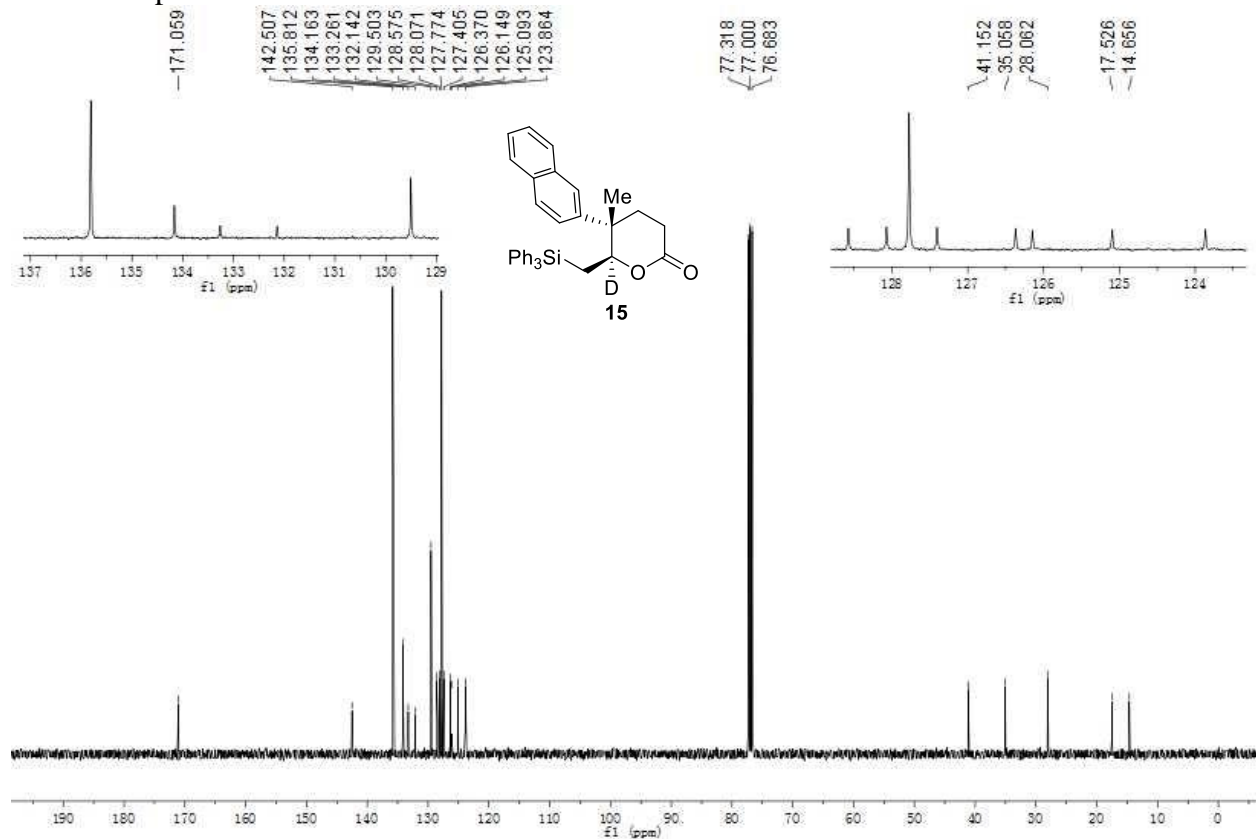

## HPLC spectra of racemic **15**

<色谱图>

mAU

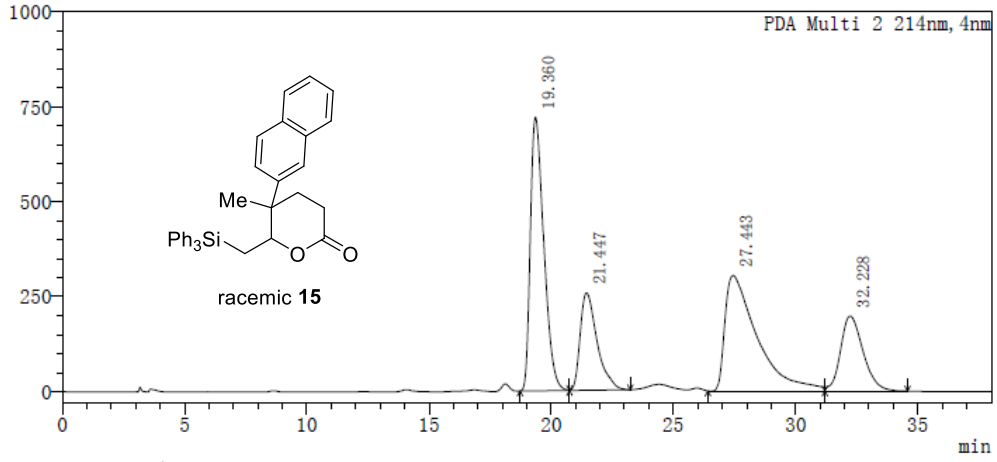

| Peak | Time   | Area     | Area%   |
|------|--------|----------|---------|
| 1    | 19.360 | 27626820 | 34.357  |
| 2    | 21.447 | 12308026 | 15.306  |
| 3    | 27.443 | 27798281 | 34.570  |
| 4    | 32.228 | 12677954 | 15.766  |
| 总计   |        | 80411080 | 100.000 |

## HPLC spectra of **15**

<色谱图>

mAU

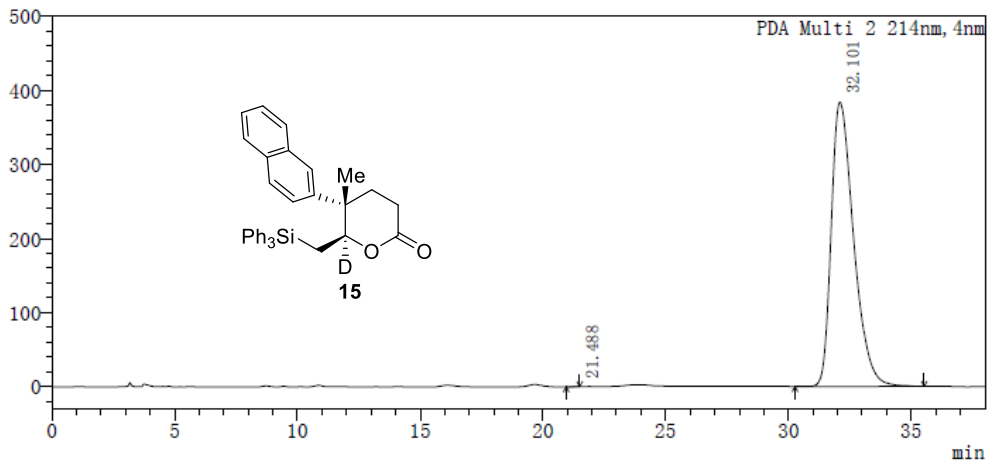

| Peak | Time   | Area     | Area%   |
|------|--------|----------|---------|
| 1    | 21.488 | 919      | 0.004   |
| 2    | 32.101 | 24346503 | 99.996  |
| 总计   |        | 24347422 | 100.000 |

# <sup>1</sup>H NMR spectra of **16**

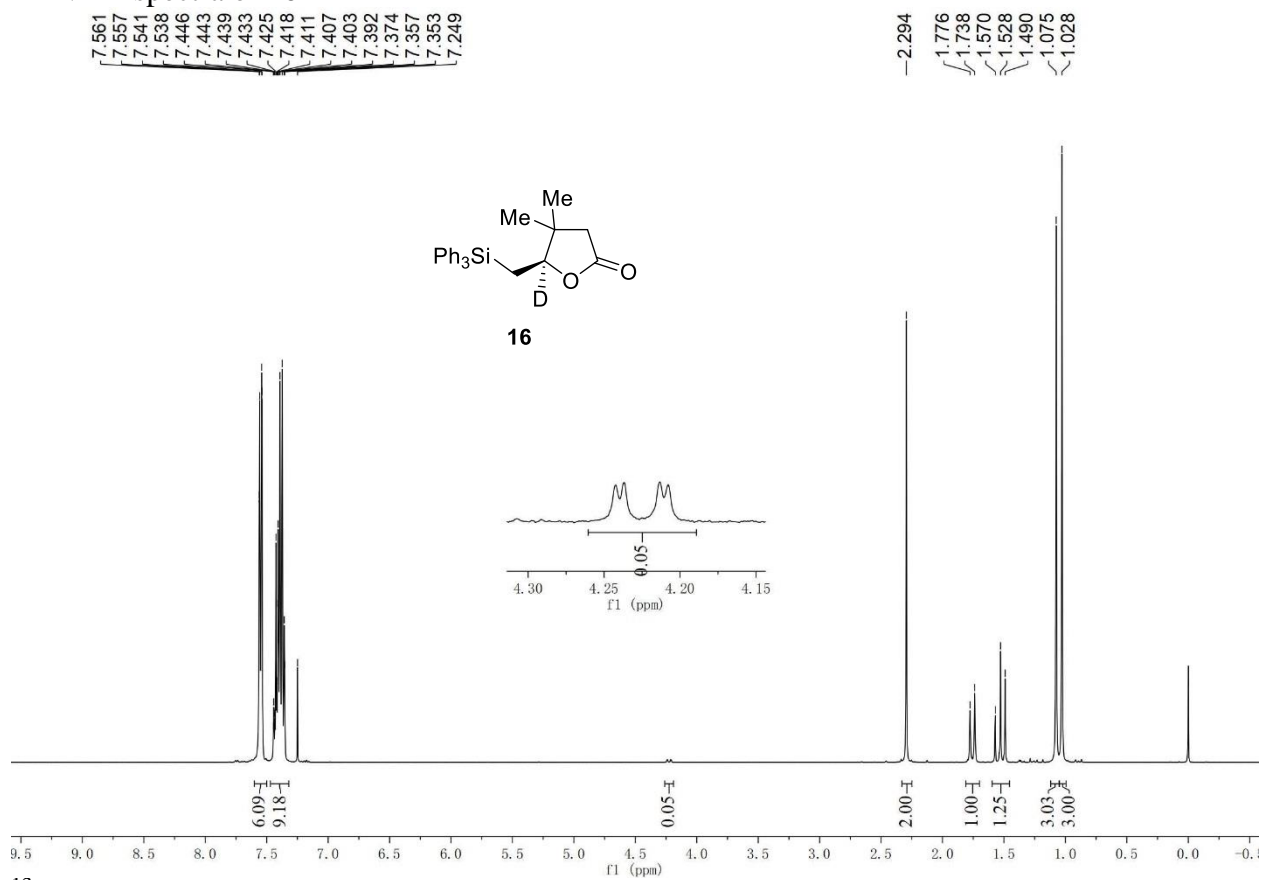

# <sup>13</sup>C NMR spectra of **16**

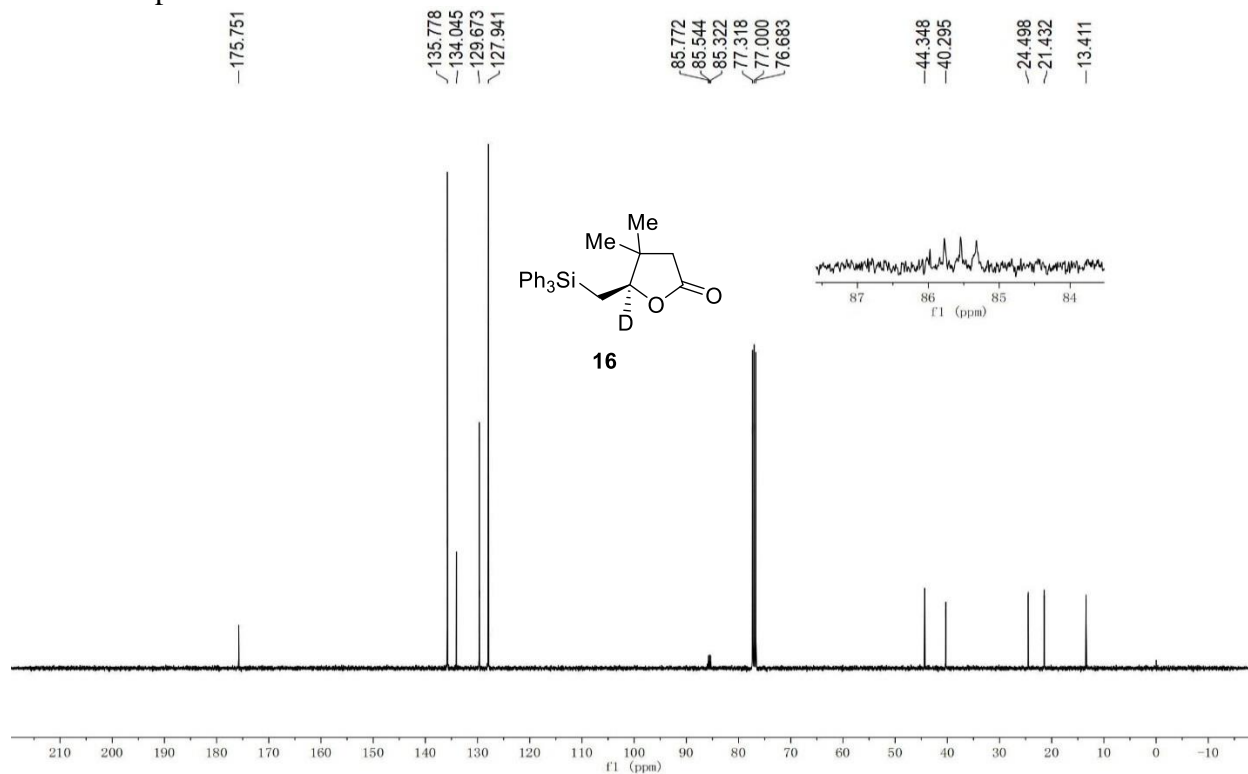



## HPLC spectra of racemic **16**

Data File : (16-RACEMIC)SQL-3-87-2.lcd  
 Method File : AD-H-98.5+1.5-1-214.lcm  
 Date Processed : 7/17/2021 10:51:00 AM

<Chromatogram View>

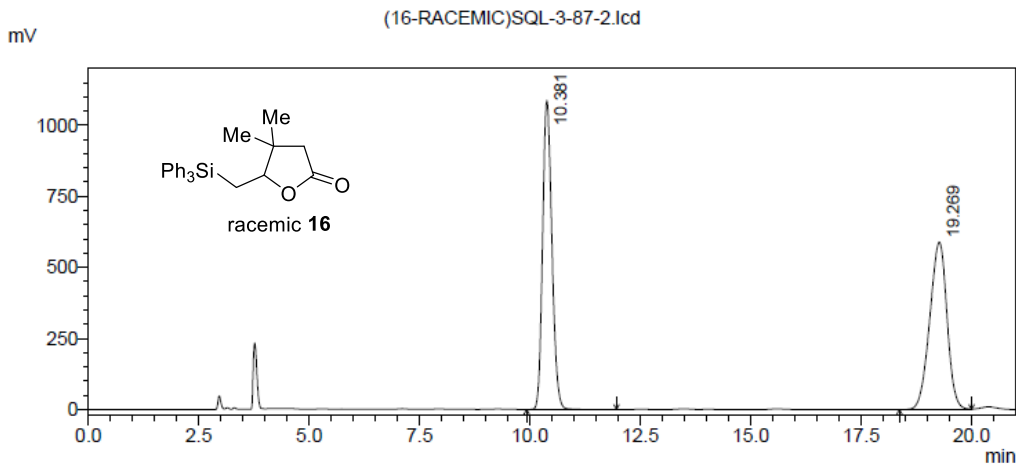

<Data Analysis>

??A 214nm

| Pesk # | Ret. Time | Height  | Area     | Area%   |
|--------|-----------|---------|----------|---------|
| 1      | 10.381    | 1084901 | 15936371 | 49.882  |
| 2      | 19.269    | 588448  | 16011929 | 50.118  |
| Total  |           | 1673349 | 31948300 | 100.000 |

## HPLC spectra of **16**

Data File : (16-CHIRAL)RAM-3-128.lcd  
 Method File : AD-H-98.5-1-214.lcm  
 Date Processed : 7/17/2021 10:51:29 AM

<Chromatogram View>

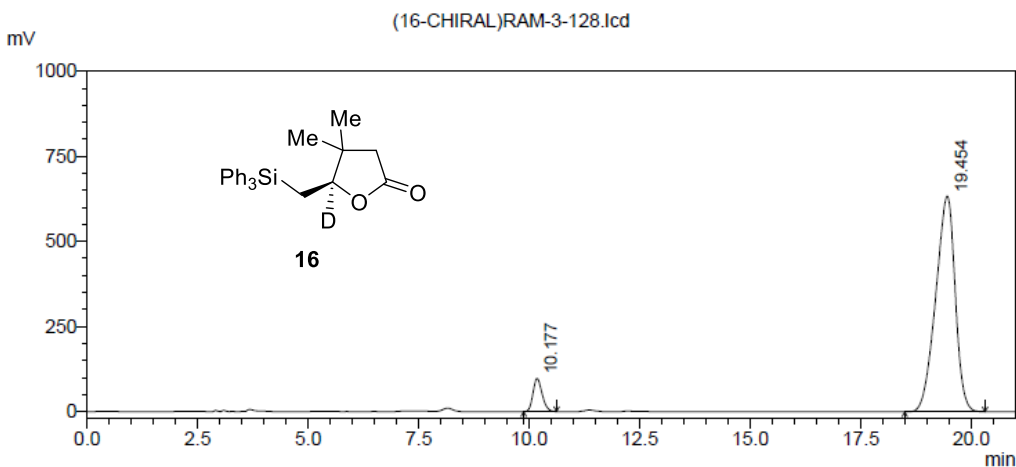

<Data Analysis>

DetA 214nm

| Pesk # | Ret. Time | Height | Area     | Area%   |
|--------|-----------|--------|----------|---------|
| 1      | 10.177    | 97154  | 1401033  | 6.730   |
| 2      | 19.454    | 633708 | 19418162 | 93.270  |
| Total  |           | 730862 | 20819195 | 100.000 |

# <sup>1</sup>H NMR spectra of **17**

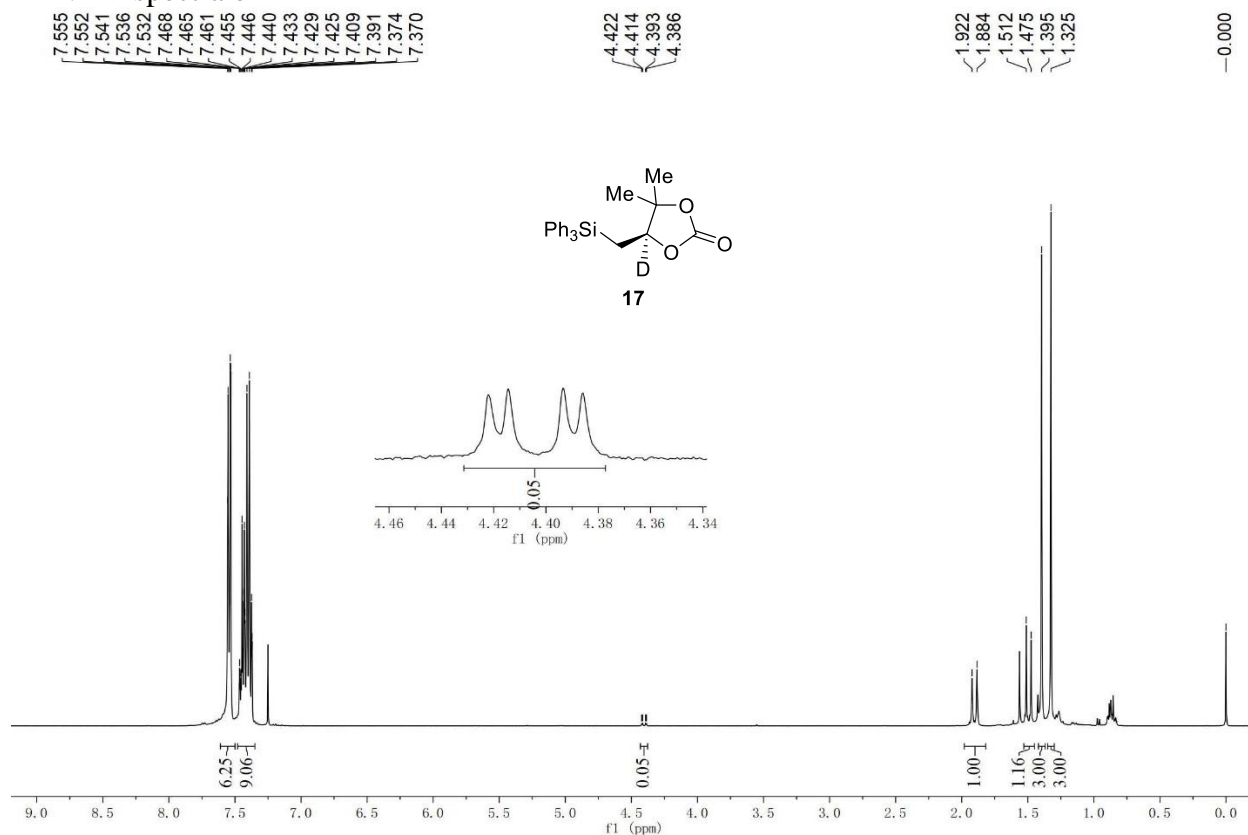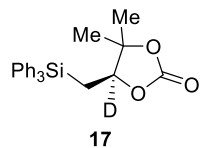

# <sup>13</sup>C NMR spectra of **17**

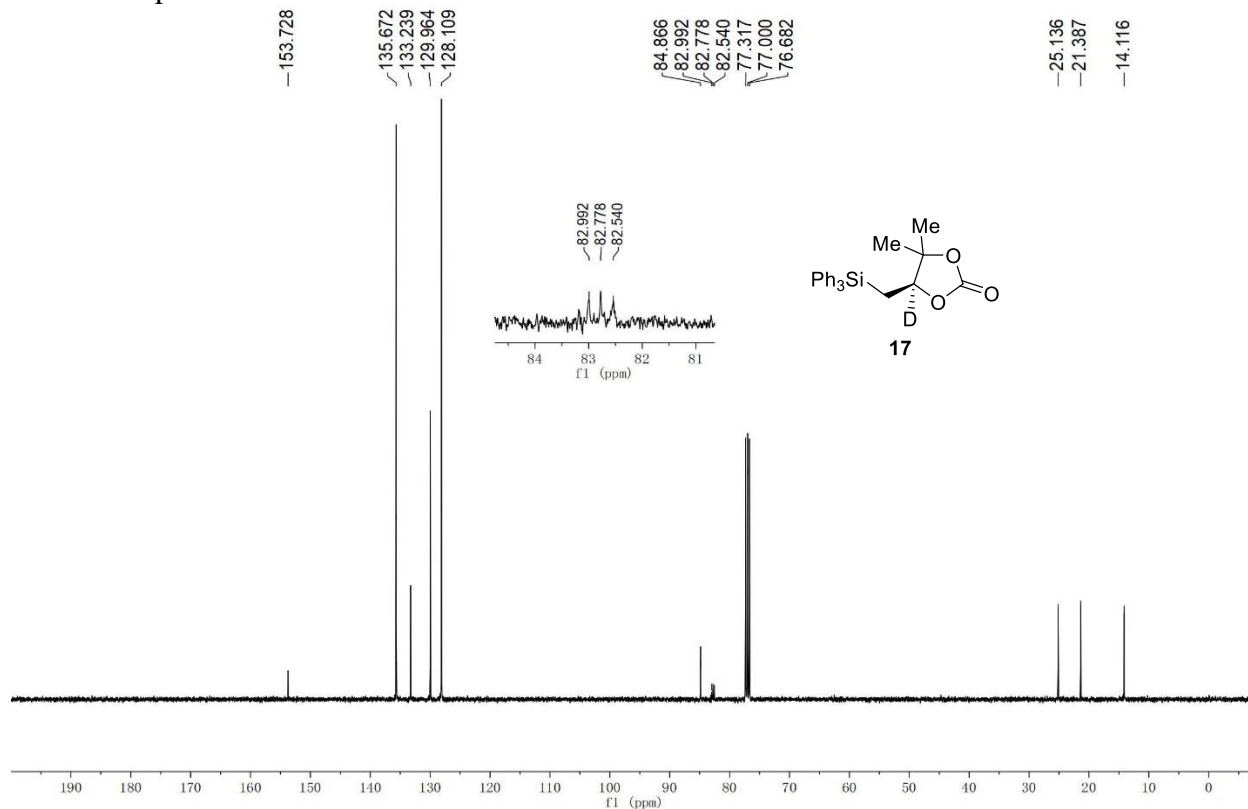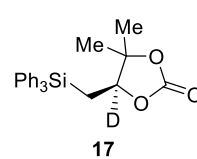

## HPLC spectra of racemic **17**

Data File : 17-RACEMIC-SQL-3-124-7.lcd  
 Method File : 3AD-H-96-1-214.lcm  
 Date Processed : 7/17/2021 10:59:56 AM

<Chromatogram View>

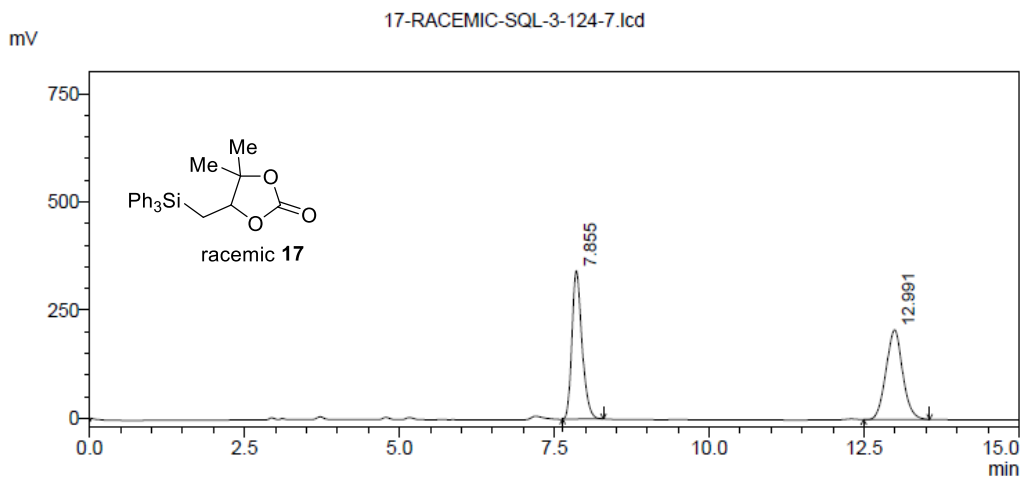

<Data Analysis>

| Pesk # | Ret. Time | Height | Area    | Area%   |
|--------|-----------|--------|---------|---------|
| 1      | 7.855     | 341854 | 3894683 | 50.095  |
| 2      | 12.991    | 206828 | 3879886 | 49.905  |
| Total  |           | 548681 | 7774568 | 100.000 |

## HPLC spectra of **17**

Data File : 17-CHIRAL-RAM-3-71-3.lcd  
 Method File : 3AD-H-96-1-214.lcm  
 Date Processed : 7/17/2021 10:55:38 AM

<Chromatogram View>

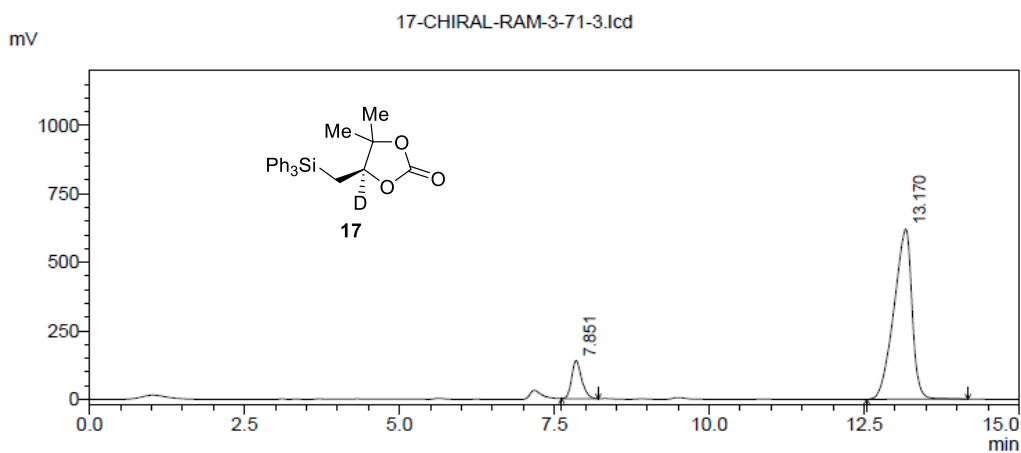

<Data Analysis>

| Pesk # | Ret. Time | Height | Area     | Area%   |
|--------|-----------|--------|----------|---------|
| 1      | 7.851     | 138850 | 1564533  | 11.023  |
| 2      | 13.170    | 620976 | 12628511 | 88.977  |
| Total  |           | 759826 | 14193045 | 100.000 |

# <sup>1</sup>H NMR spectra of **18**

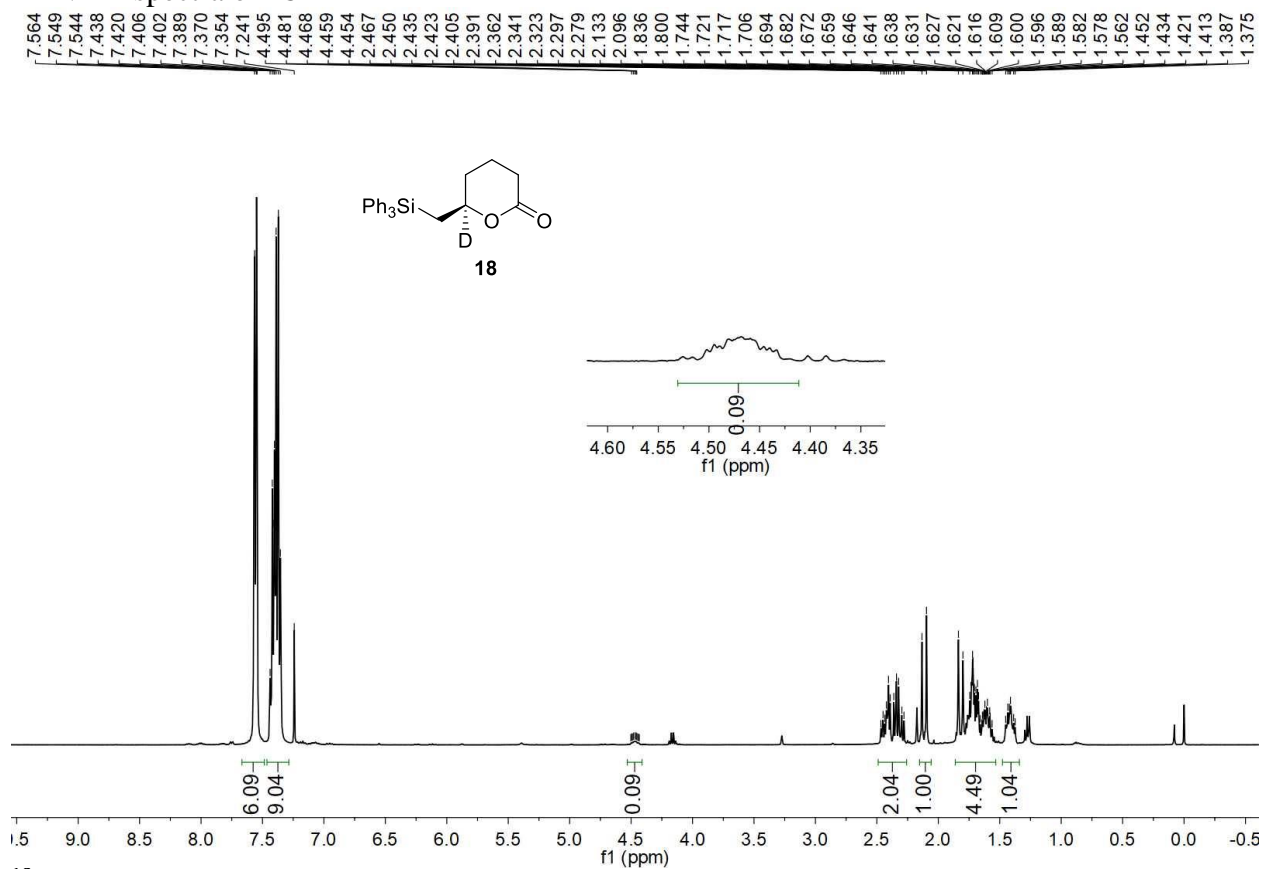

# <sup>13</sup>C NMR spectra of **18**

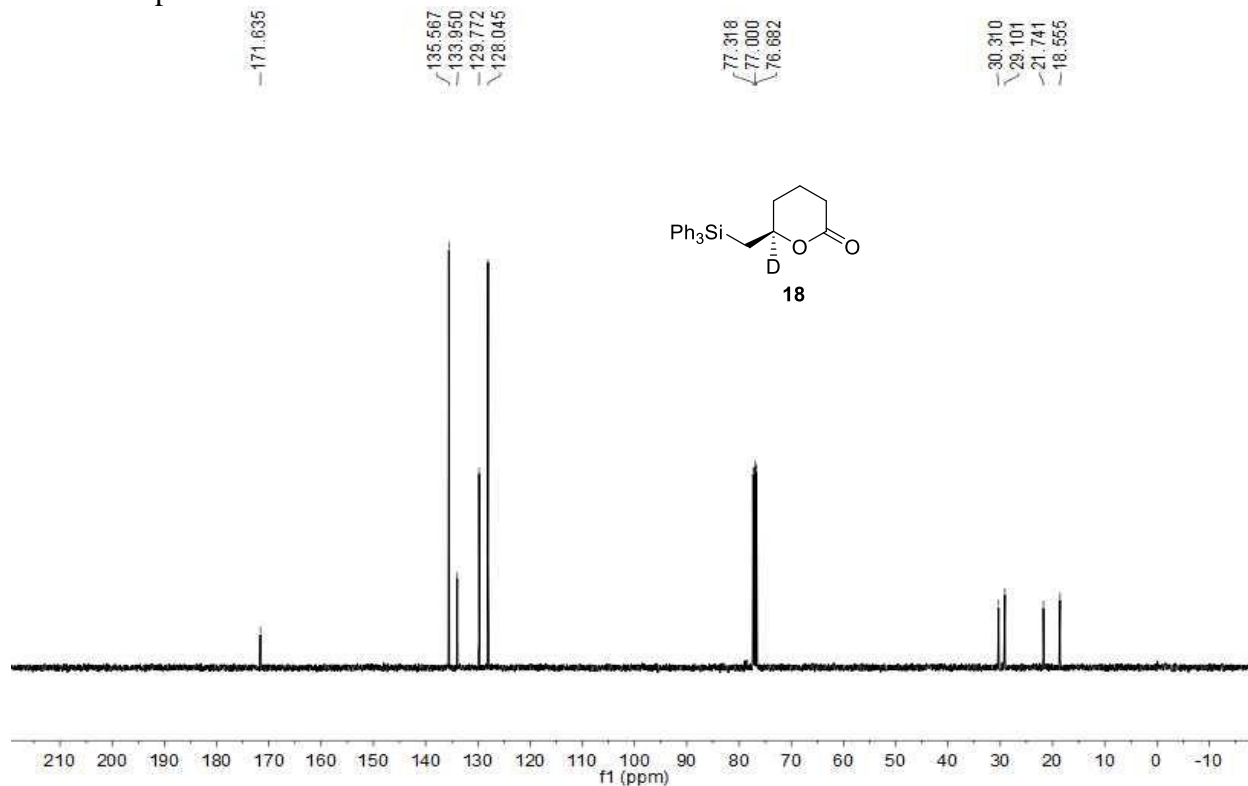

## HPLC spectra of racemic **18**

Data File : sql-3-75-p3-5.lcd  
 Method File : 3AD-H-96-1-214-20min.lcm  
 Date Processed : 9/2/2021 1:07:06 AM

### <Chromatogram View>

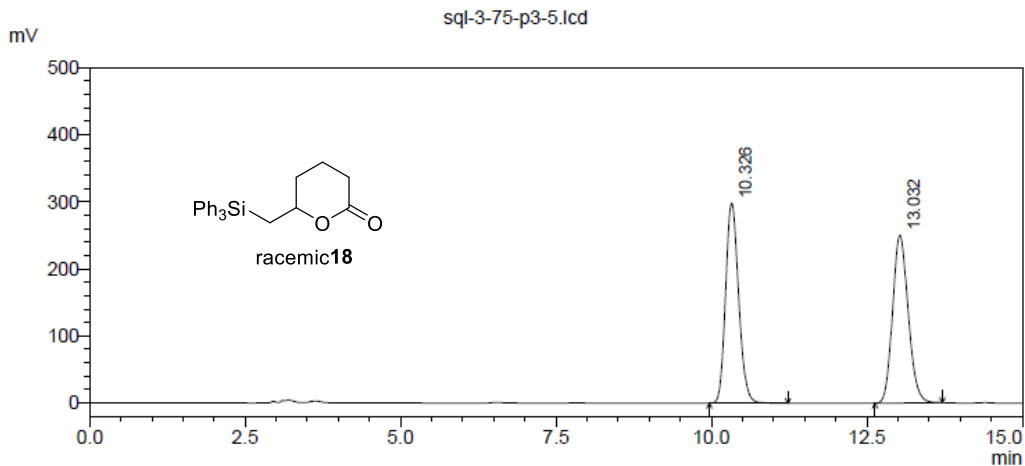

### <Data Analysis>

Detector A 214nm

| Peak # | Ret. Time | Height | Area    | Area%   |
|--------|-----------|--------|---------|---------|
| 1      | 10.326    | 298674 | 4364115 | 49.833  |
| 2      | 13.032    | 250703 | 4393391 | 50.167  |
| Total  |           | 549376 | 8757506 | 100.000 |

## HPLC spectra of **18**

Data File : SQL-6-23-1.lcd  
 Method File : 3AD-H-96-1-214-20min.lcm  
 Date Processed : 8/7/2021 10:54:55 AM

### <Chromatogram View>

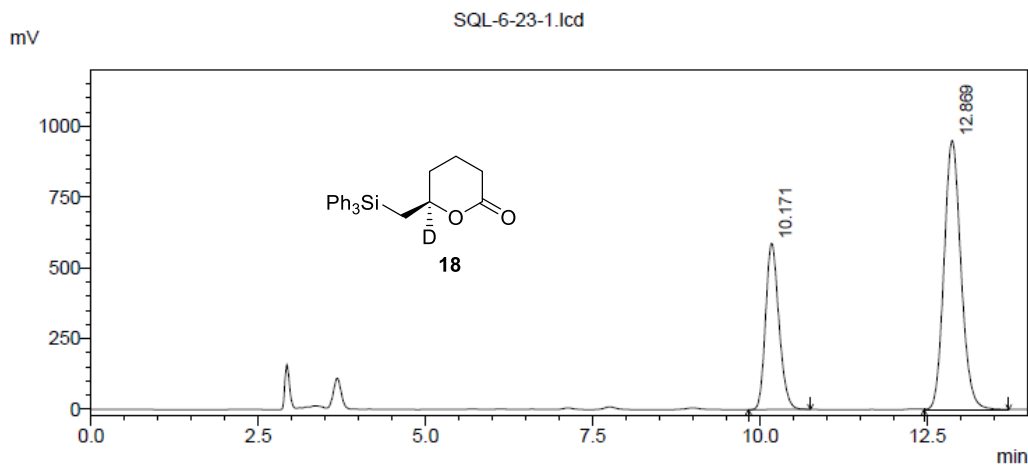

### <Data Analysis>

Detector A 214nm

| Peak # | Ret. Time | Height  | Area     | Area%   |
|--------|-----------|---------|----------|---------|
| 1      | 10.171    | 586923  | 8166660  | 32.776  |
| 2      | 12.869    | 950476  | 16749671 | 67.224  |
| Total  |           | 1537400 | 24916331 | 100.000 |

# <sup>1</sup>H NMR spectra of **19**

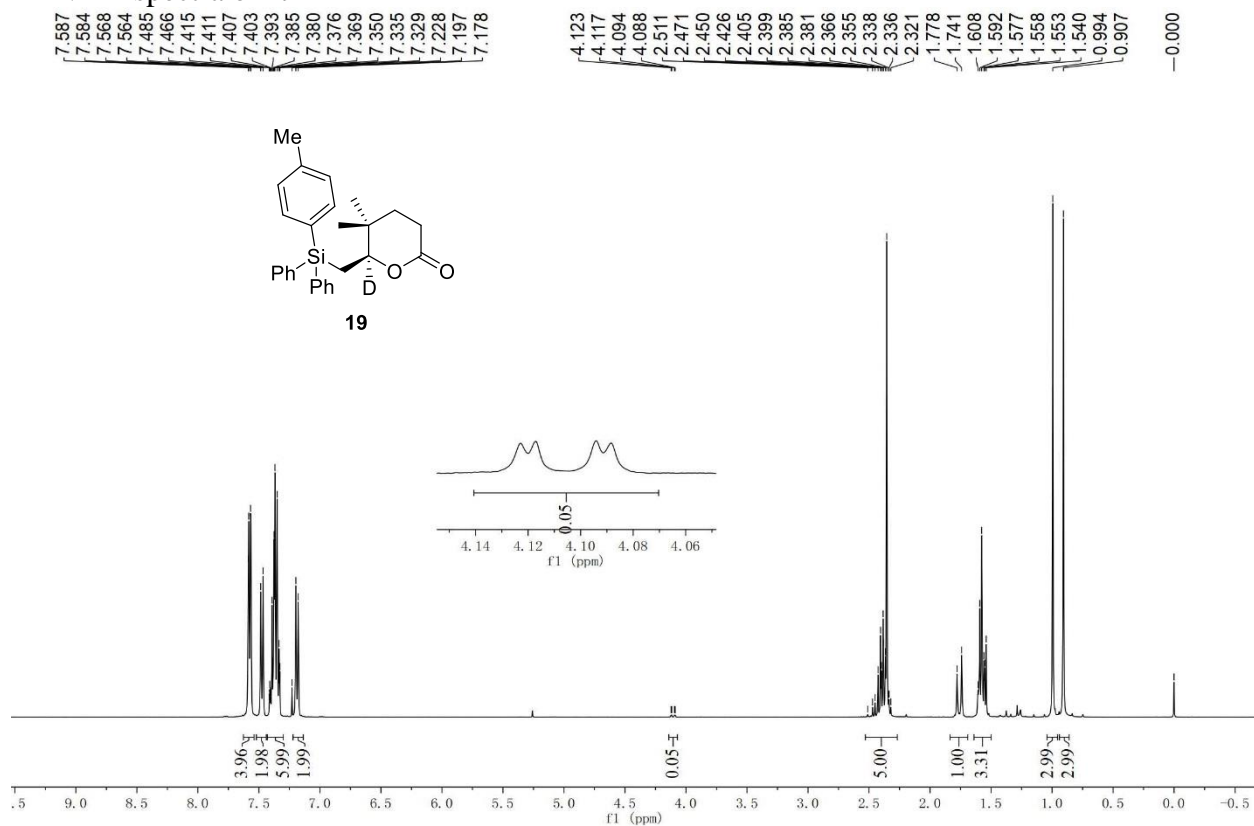

# <sup>13</sup>C NMR spectra of **19**

ram-2-248c.1.fid

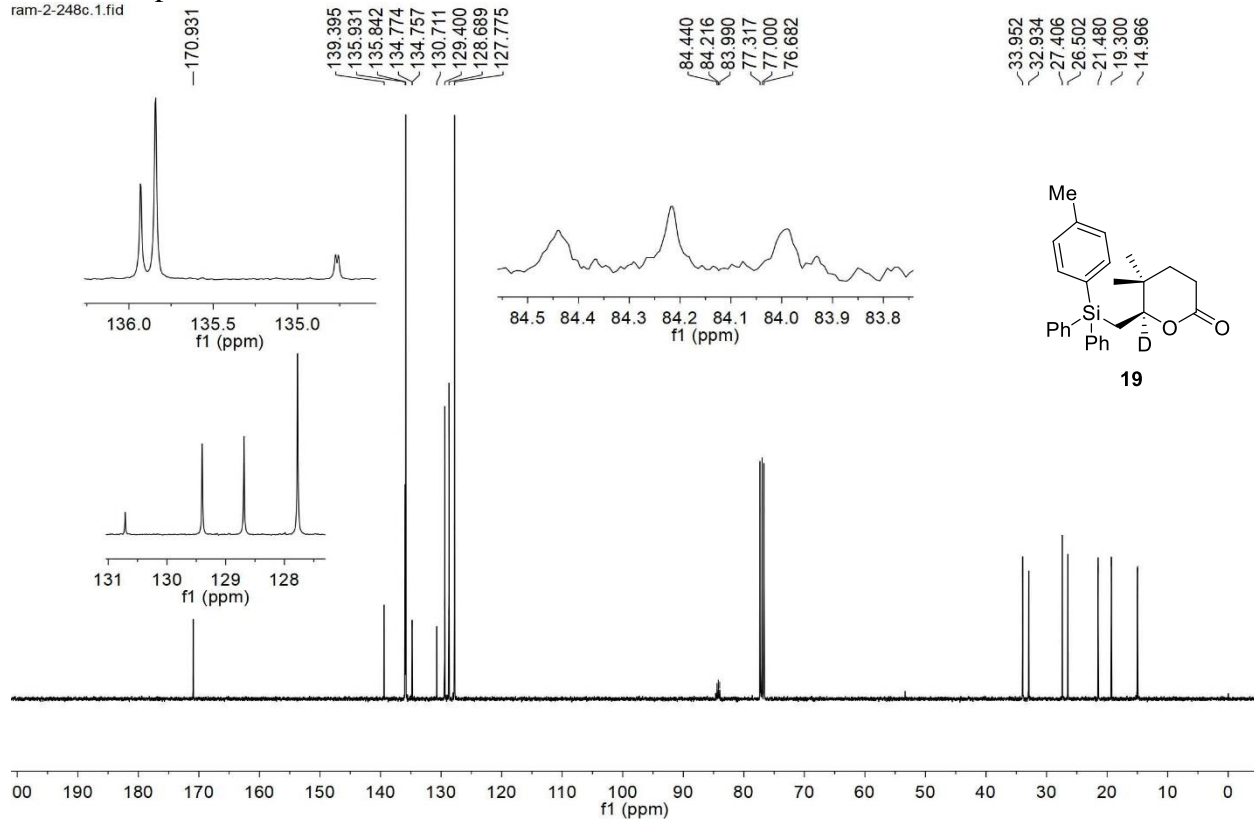

## HPLC spectra of racemic **19**

Data File : (22-RACEMIC)SQL-3-106-2.lcd  
 Method File : 3AD-H-98-1-214.lcm  
 Date Processed : 8/8/2021 12:45:27 PM

### <Chromatogram View>

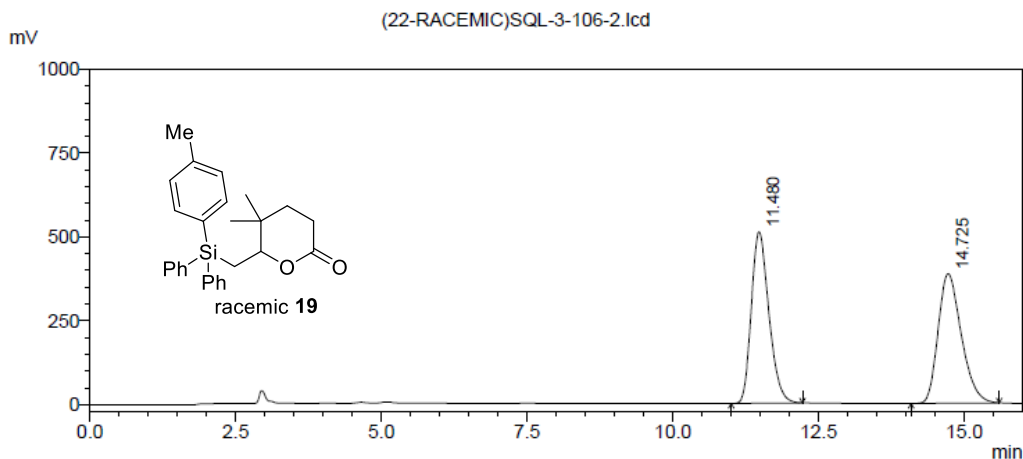

### <Data Analysis>

| DetA 214nm |           |        |          |         |
|------------|-----------|--------|----------|---------|
| Pesk #     | Ret. Time | Height | Area     | Area%   |
| 1          | 11.480    | 510940 | 10709039 | 50.059  |
| 2          | 14.725    | 386319 | 10683683 | 49.941  |
| Total      |           | 897259 | 21392722 | 100.000 |

## HPLC spectra of **19**

Data File : (22-CHIRAL)ram-2-248.lcd  
 Method File : 3AD-H-98-1-214.lcm  
 Date Processed : 8/8/2021 12:45:39 PM

### <Chromatogram View>

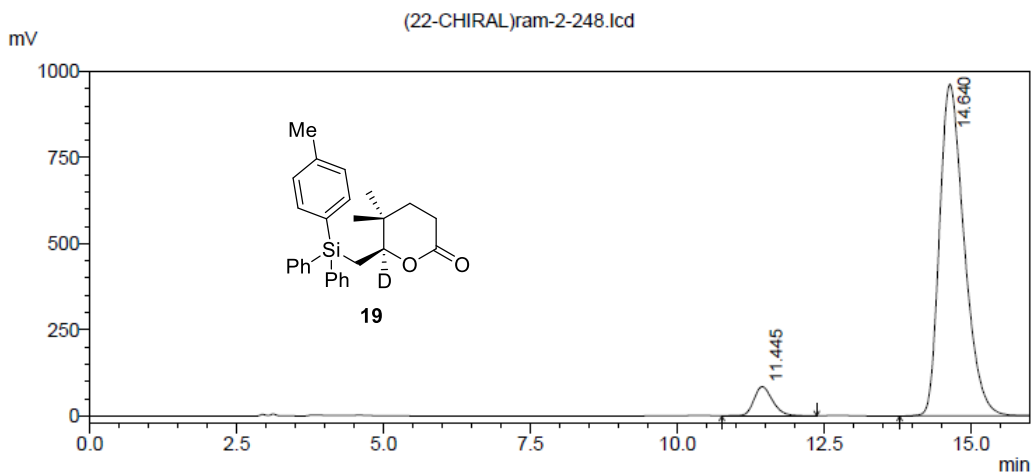

### <Data Analysis>

| DetA 214nm |           |         |          |         |
|------------|-----------|---------|----------|---------|
| Pesk #     | Ret. Time | Height  | Area     | Area%   |
| 1          | 11.445    | 85181   | 1911021  | 6.363   |
| 2          | 14.640    | 962668  | 28120980 | 93.637  |
| Total      |           | 1047850 | 30032001 | 100.000 |

<sup>1</sup>H NMR spectra of **20**

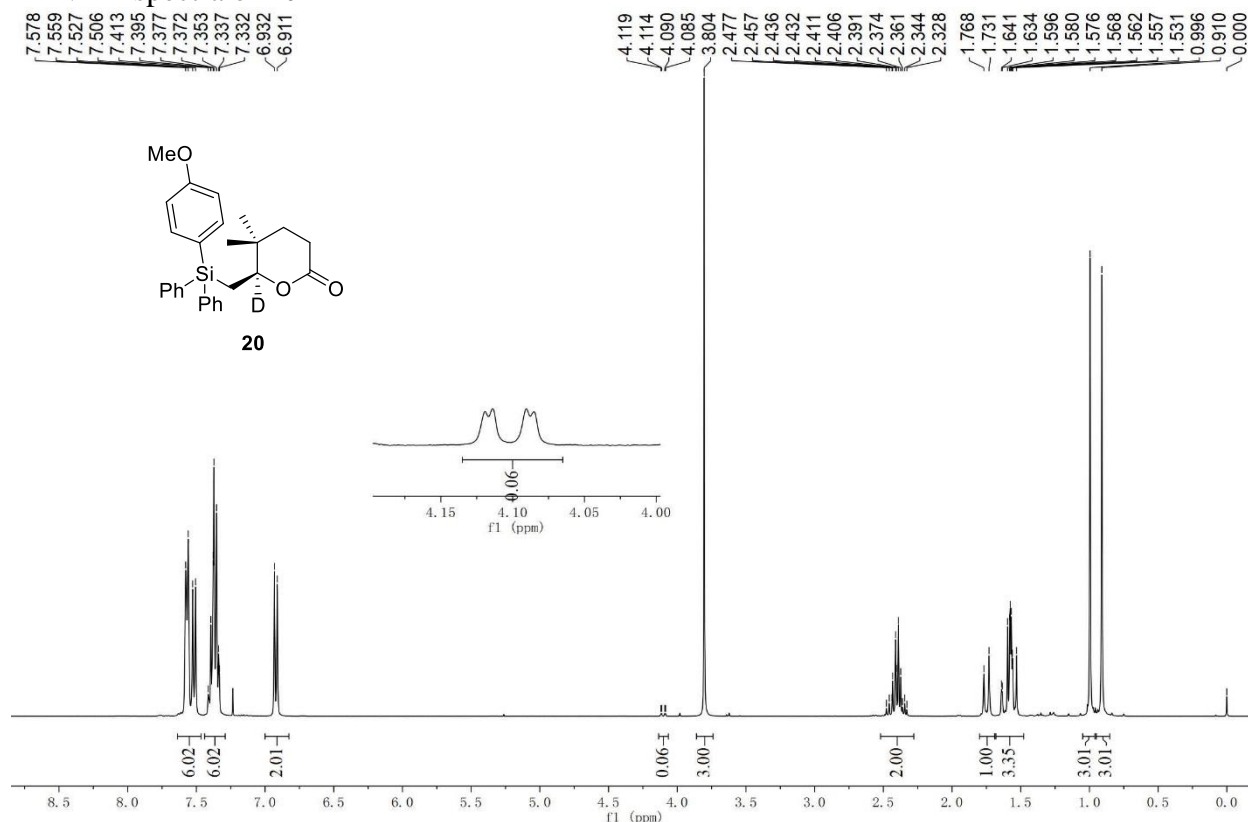

<sup>13</sup>C NMR spectra of **20**

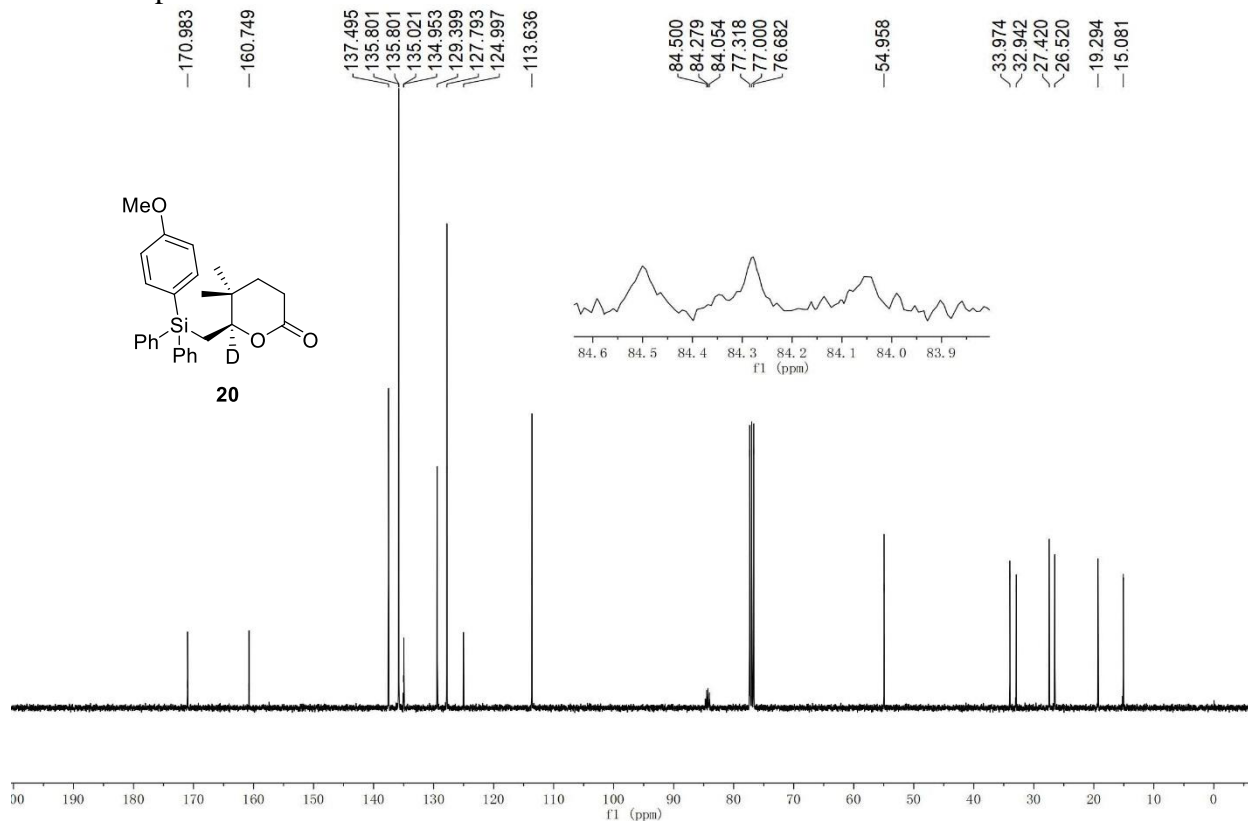



## HPLC spectra of racemic **20**

Data File : (23-racemic)SQL-3-94-2RACEMIC001.lcd  
 Method File : 3AD-H-98-1-214-30min.lcm  
 Date Processed : 8/8/2021 12:44:38 PM

### <Chromatogram View>

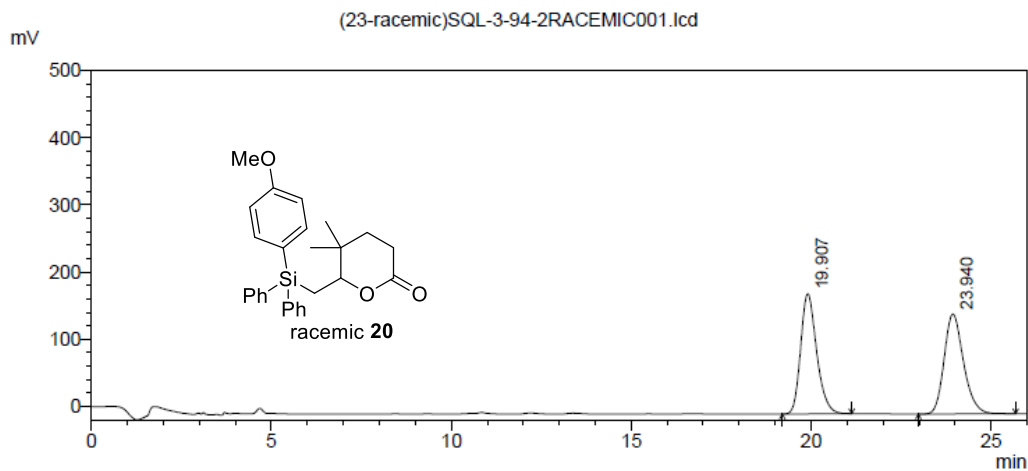

### <Data Analysis>

DetA 214nm

| Pesk # | Ret. Time | Height | Area     | Area%   |
|--------|-----------|--------|----------|---------|
| 1      | 19.907    | 178450 | 5531869  | 49.767  |
| 2      | 23.940    | 148659 | 5583556  | 50.233  |
| Total  |           | 327109 | 11115426 | 100.000 |

## HPLC spectra of **20**

Data File : (23chiral)RAM-3-247chiral.lcd  
 Method File : 3AD-H-98-1-214-30min.lcm  
 Date Processed : 8/8/2021 12:44:22 PM

### <Chromatogram View>

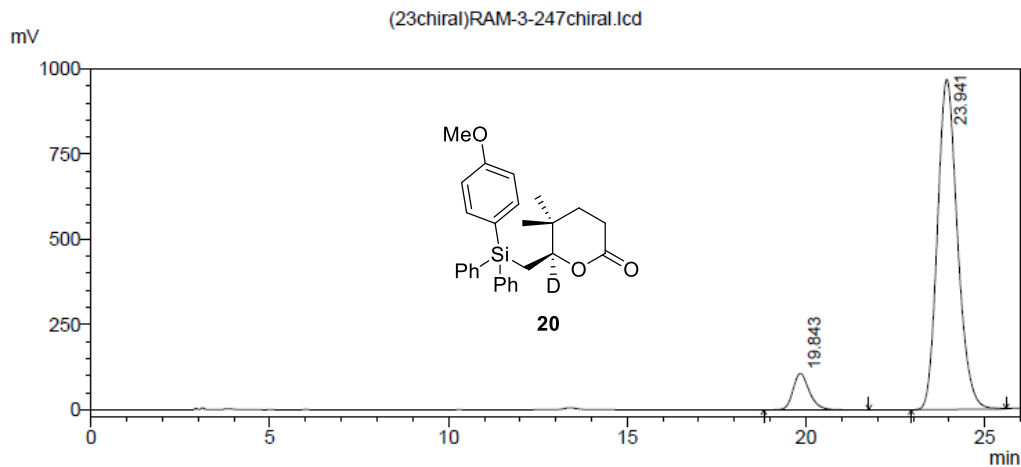

### <Data Analysis>

DetA 214nm

| Pesk # | Ret. Time | Height  | Area     | Area%   |
|--------|-----------|---------|----------|---------|
| 1      | 19.843    | 106719  | 3394332  | 8.223   |
| 2      | 23.941    | 969018  | 37884357 | 91.777  |
| Total  |           | 1075737 | 41278689 | 100.000 |

<sup>1</sup>H NMR spectra of **21**

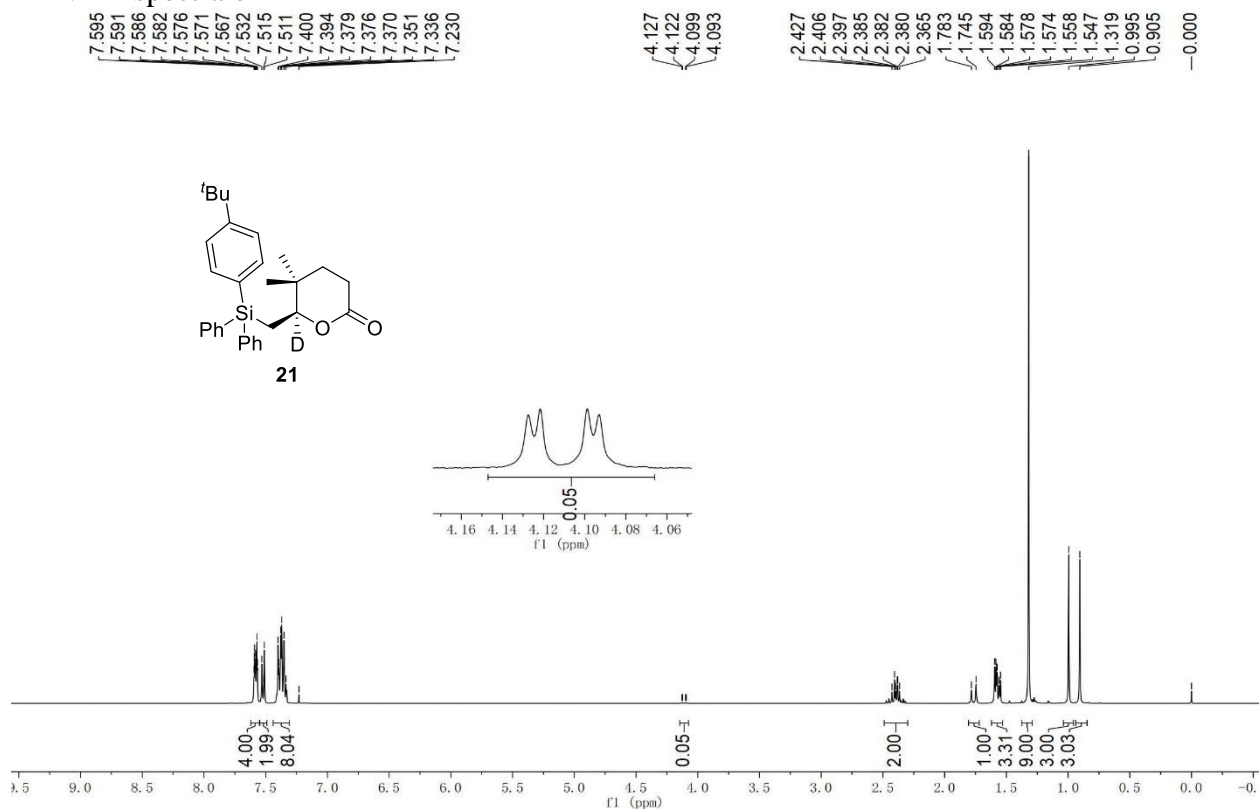

<sup>13</sup>C NMR spectra of **21**

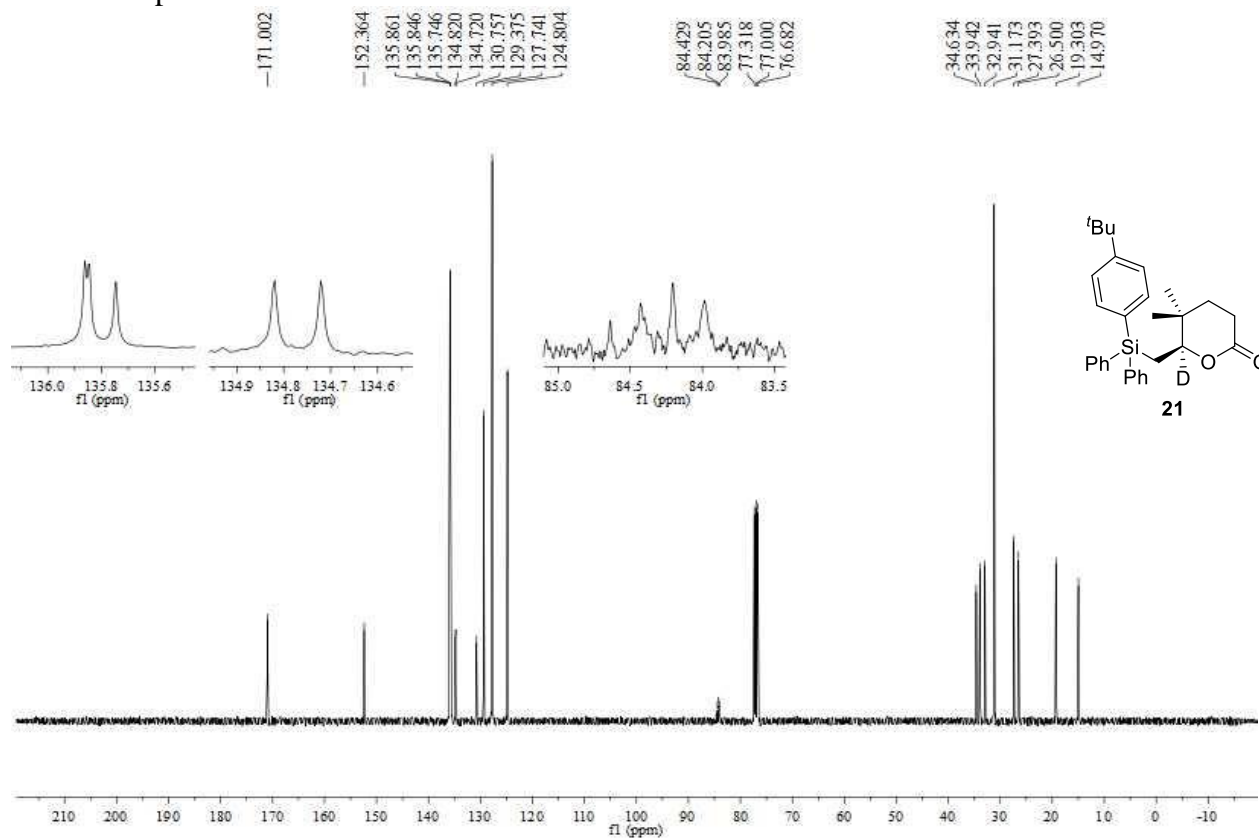

## HPLC spectra of racemic **21**

Data File : (24-RACEMIC)SQL-3-119-2.lcd  
 Method File : AD-H-98.5+1.5-1-214.lcm  
 Date Processed : 8/8/2021 12:43:54 PM

<Chromatogram View>

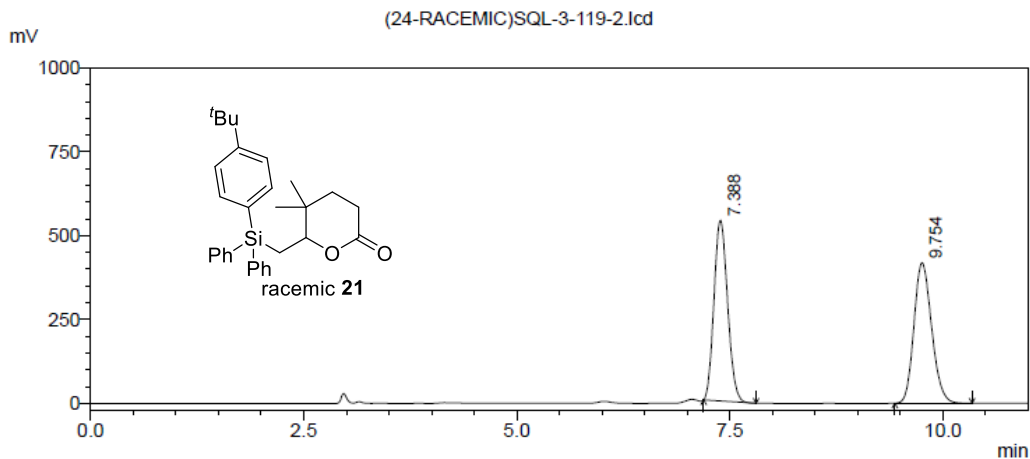

<Data Analysis>

??A 214nm

| Pesk # | Ret. Time | Height | Area     | Area%   |
|--------|-----------|--------|----------|---------|
| 1      | 7.388     | 538245 | 5976197  | 49.702  |
| 2      | 9.754     | 418608 | 6047791  | 50.298  |
| Total  |           | 956853 | 12023987 | 100.000 |

## HPLC spectra of **21**

Data File : (24-CHIRAL)-RAM-2-331.lcd  
 Method File : AD-H-98.5+1.5-1-214.lcm  
 Date Processed : 8/8/2021 12:44:05 PM

<Chromatogram View>

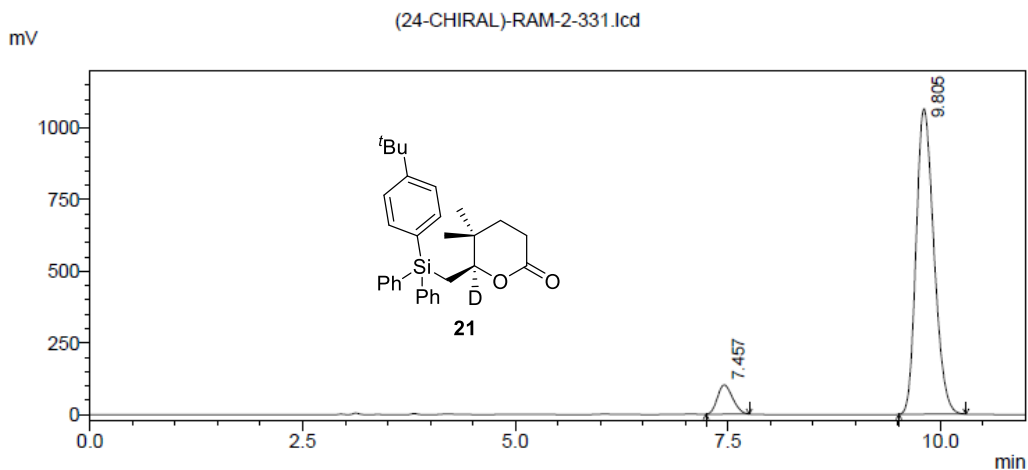

<Data Analysis>

??A 214nm

| Pesk # | Ret. Time | Height  | Area     | Area%   |
|--------|-----------|---------|----------|---------|
| 1      | 7.457     | 101892  | 1264009  | 7.536   |
| 2      | 9.805     | 1065230 | 15508625 | 92.464  |
| Total  |           | 1167122 | 16772634 | 100.000 |

# <sup>1</sup>H NMR spectra of **22**

ram-2-258b-3.1.fid

7.592  
7.577  
7.571  
7.559  
7.543  
7.540  
7.432  
7.415  
7.398  
7.386  
7.368  
7.352  
7.249  
7.087  
7.065  
7.043

4.102  
4.096  
4.073  
4.068  
2.486  
2.465  
2.441  
2.420  
2.414  
2.399  
2.382  
2.368  
2.353  
2.336  
1.785  
1.748  
1.608  
1.588  
1.582  
1.577  
1.569  
1.539  
1.006  
0.923  
-0.000

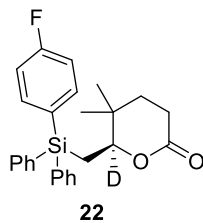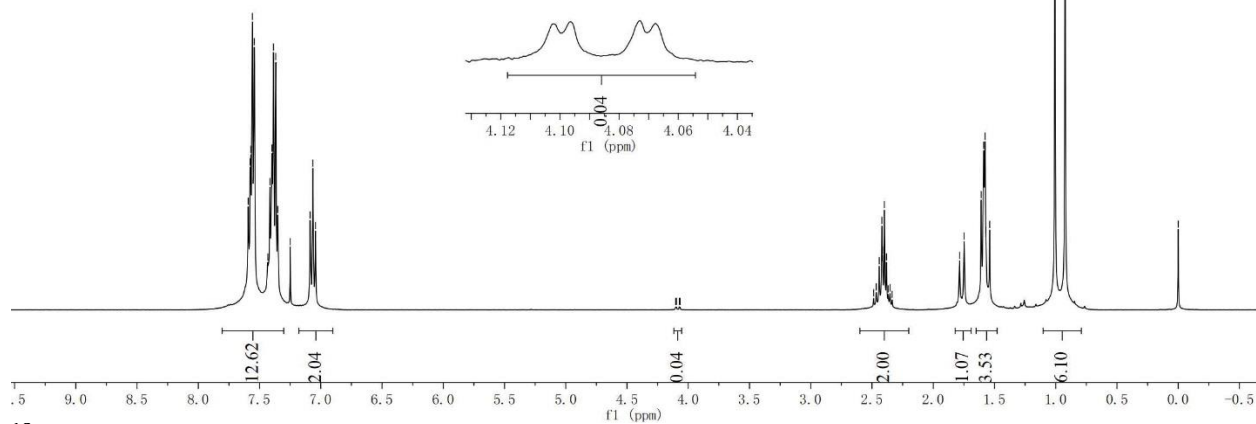

# <sup>13</sup>C NMR spectra of **22**

170.867  
165.226  
162.749  
138.059  
137.984  
135.802  
135.732  
134.537  
134.238  
129.956  
129.919  
129.640  
129.623  
127.931  
115.163  
114.967

77.317  
77.000  
76.682

34.014  
32.931  
27.418  
26.514  
19.207  
14.993

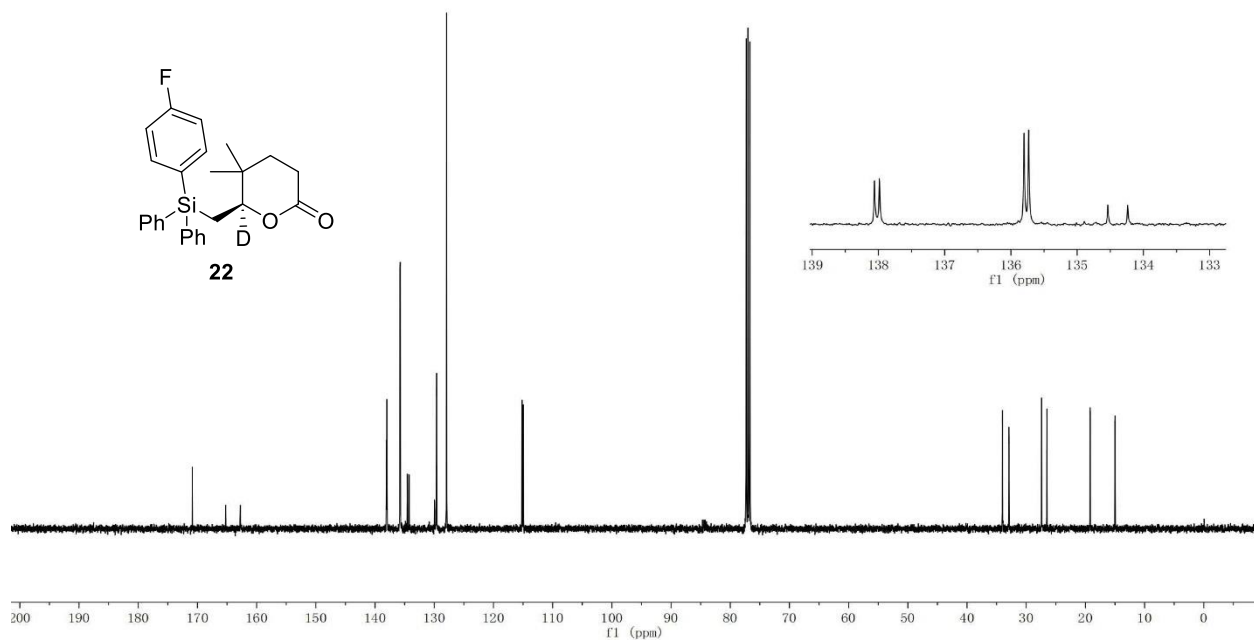

<sup>19</sup>F NMR spectra of **22**

ram-2-258b-f.10.fid

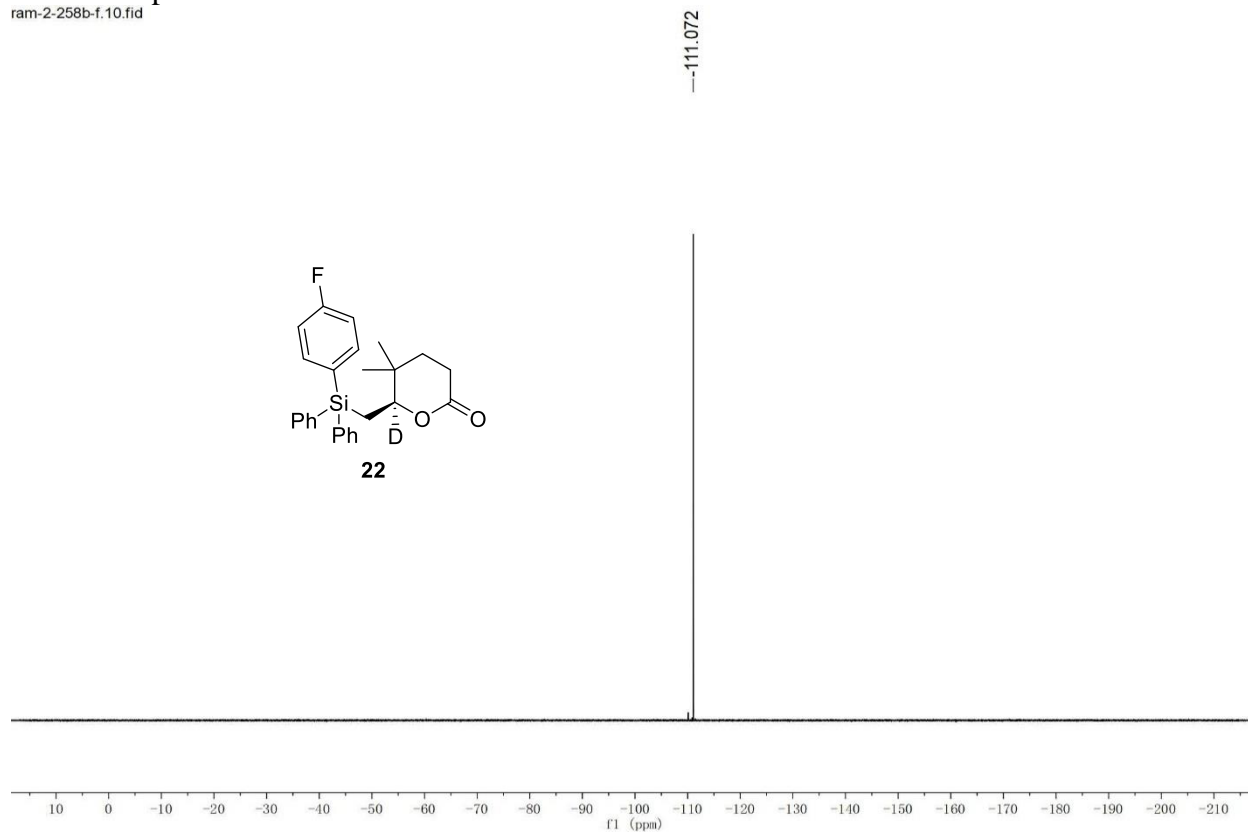

HPLC spectra of racemic **22**

Data File : 25-sql-3-105-RACEMIC.lcd  
Method File : 3AD-H-98-1-214.lcm  
Date Processed : 6/25/2021 2:38:41 PM

<Chromatogram View>

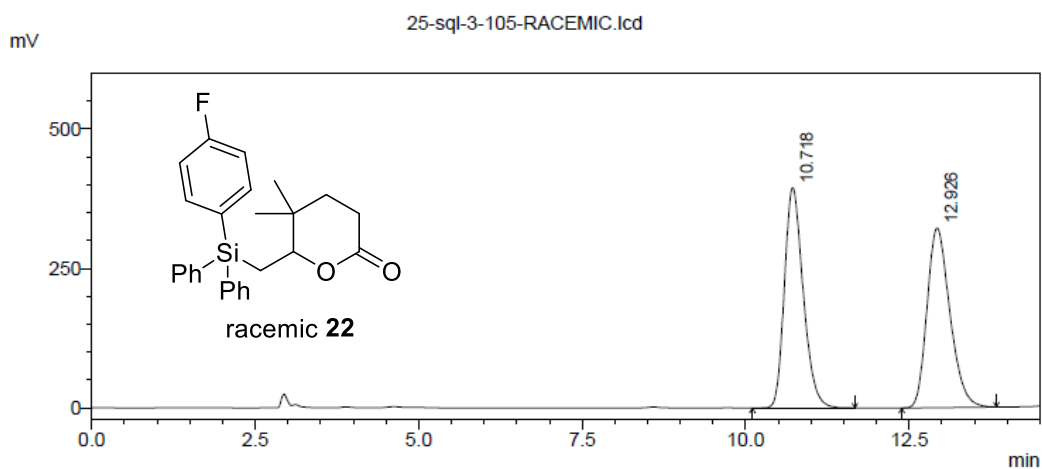

<Data Analysis>

| Pesk # | Ret. Time | Height | Area     | Area%   |
|--------|-----------|--------|----------|---------|
| 1      | 10.718    | 394814 | 7903651  | 50.158  |
| 2      | 12.926    | 321829 | 7853985  | 49.842  |
| Total  |           | 716643 | 15757636 | 100.000 |

# HPLC spectra of 22

Data File : 25-RAM-2-258B.lcd  
 Method File : 3AD-H-98-1-214.lcm  
 Date Processed : 6/25/2021 2:58:31 PM

## <Chromatogram View>

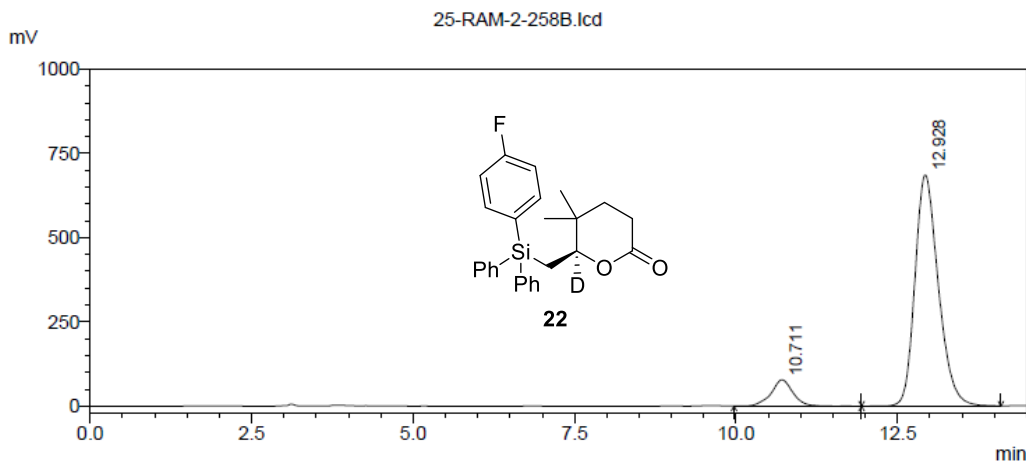

## <Data Analysis>

| Pesk # | Ret. Time | Height | Area     | Area%   |
|--------|-----------|--------|----------|---------|
| 1      | 10.711    | 77917  | 1832328  | 9.567   |
| 2      | 12.928    | 685622 | 17320759 | 90.433  |
| Total  |           | 763539 | 19153087 | 100.000 |

## <sup>1</sup>H NMR spectra of 23

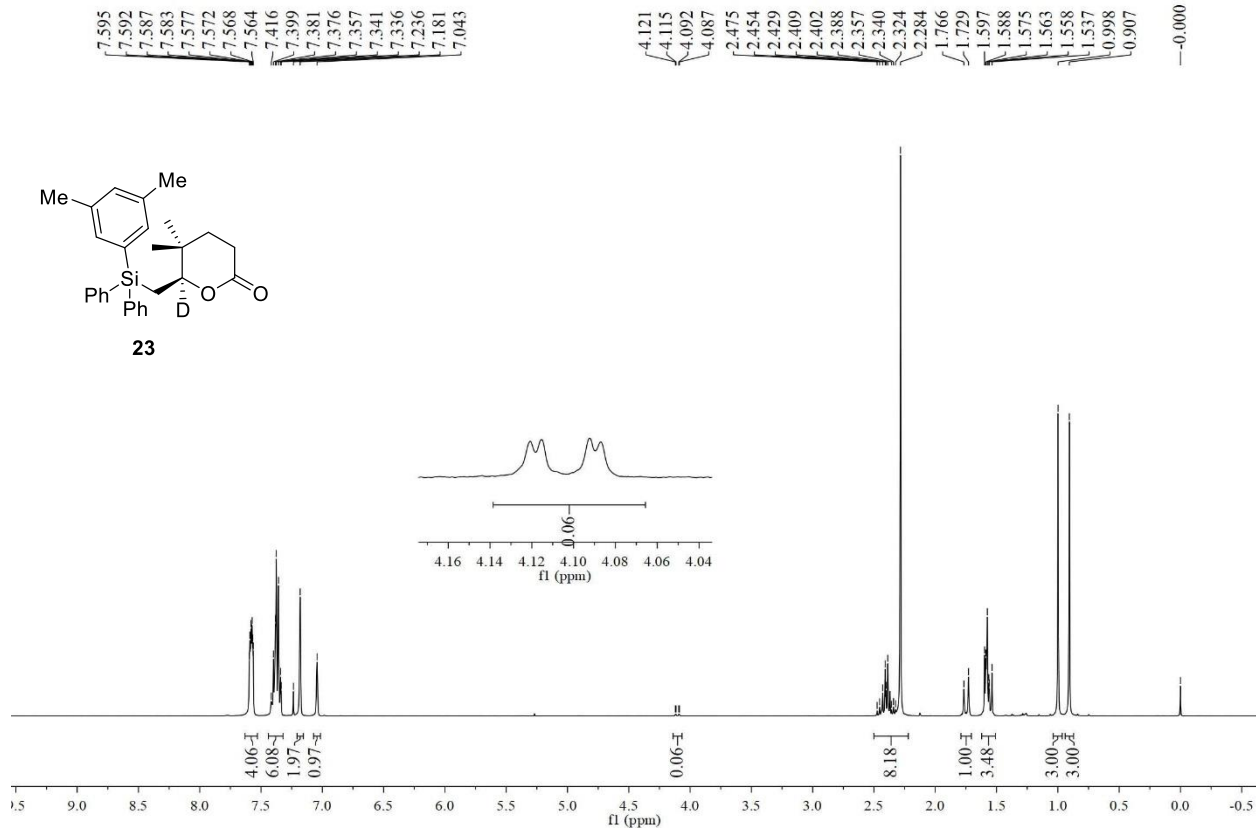

### <sup>13</sup>C NMR spectra of **23**

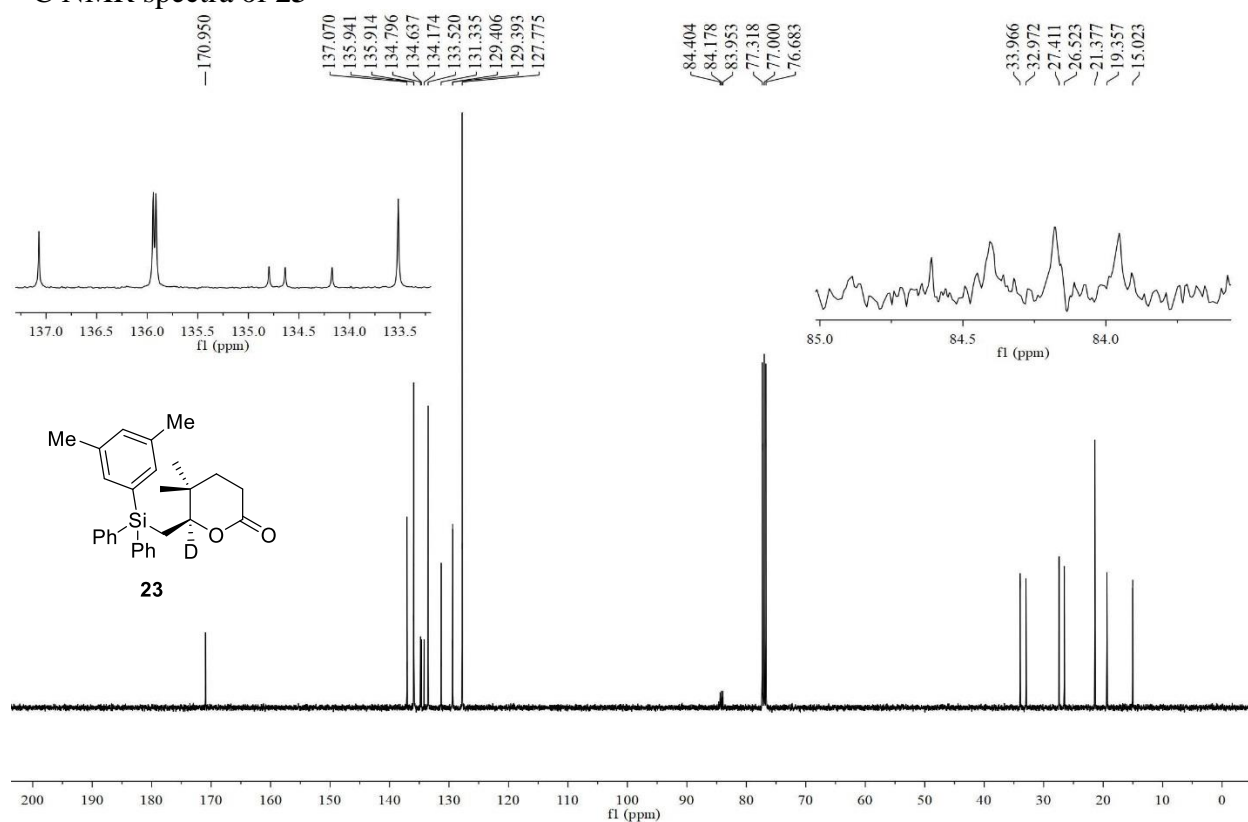

### HPLC spectra of racemic **23**

Data File : (26-racemic)SQL-3-122-3.lcd  
 Method File : AD-H-98.5+1.5-1-214.lcm  
 Date Processed : 8/8/2021 12:44:54 PM

#### <Chromatogram View>

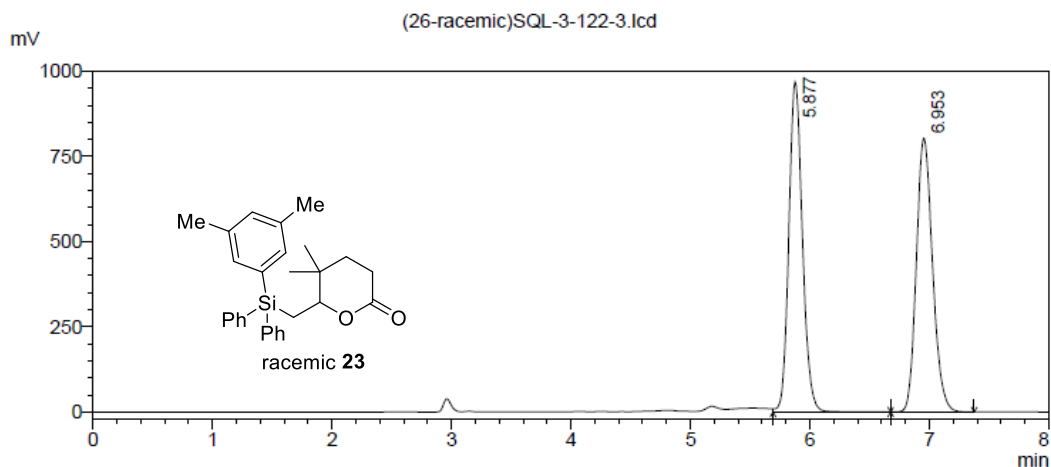

#### <Data Analysis>

| Pesk # | Ret. Time | Height  | Area     | Area%   |
|--------|-----------|---------|----------|---------|
| 1      | 5.877     | 969046  | 7673680  | 50.288  |
| 2      | 6.953     | 803512  | 7585727  | 49.712  |
| Total  |           | 1772558 | 15259407 | 100.000 |

# HPLC spectra of 23

Data File : (26-CHIRAL)RAM-2-299-1.lcd  
 Method File : 3AD-H-98-1-214-10MIN.lcm  
 Date Processed : 8/8/2021 12:45:05 PM

<Chromatogram View>

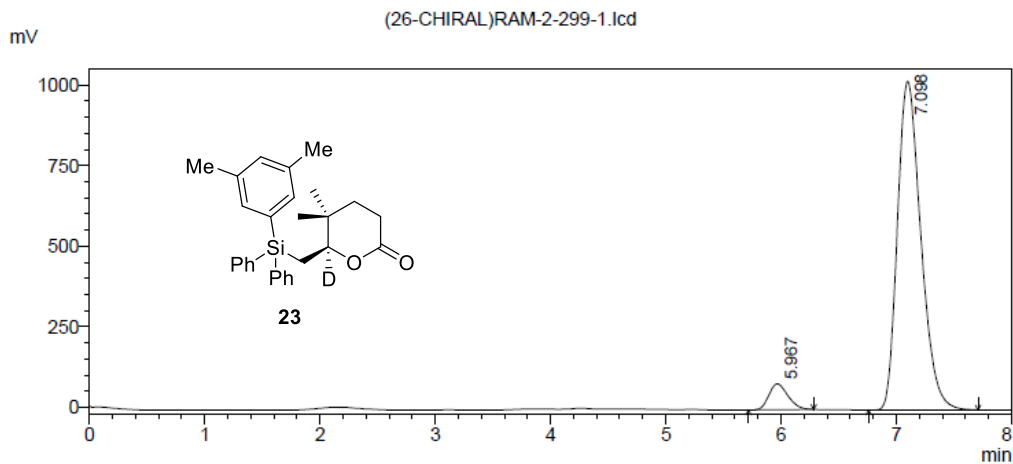

<Data Analysis>

| DetA 214nm |           |         |          |         |
|------------|-----------|---------|----------|---------|
| Peak #     | Ret. Time | Height  | Area     | Area%   |
| 1          | 5.967     | 80247   | 925329   | 6.039   |
| 2          | 7.098     | 1018794 | 14398387 | 93.961  |
| Total      |           | 1099041 | 15323717 | 100.000 |

# <sup>1</sup>H NMR spectra of 24

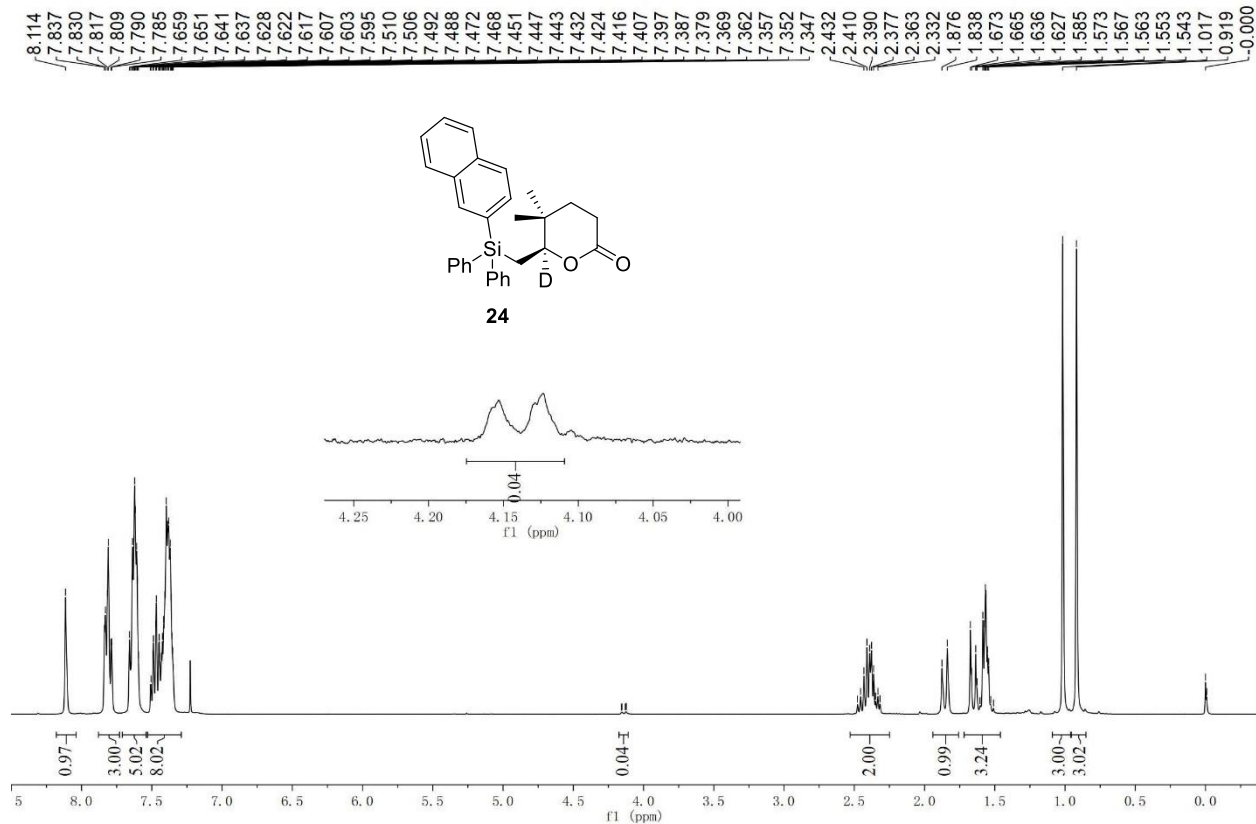



### <sup>13</sup>C NMR spectra of **24**

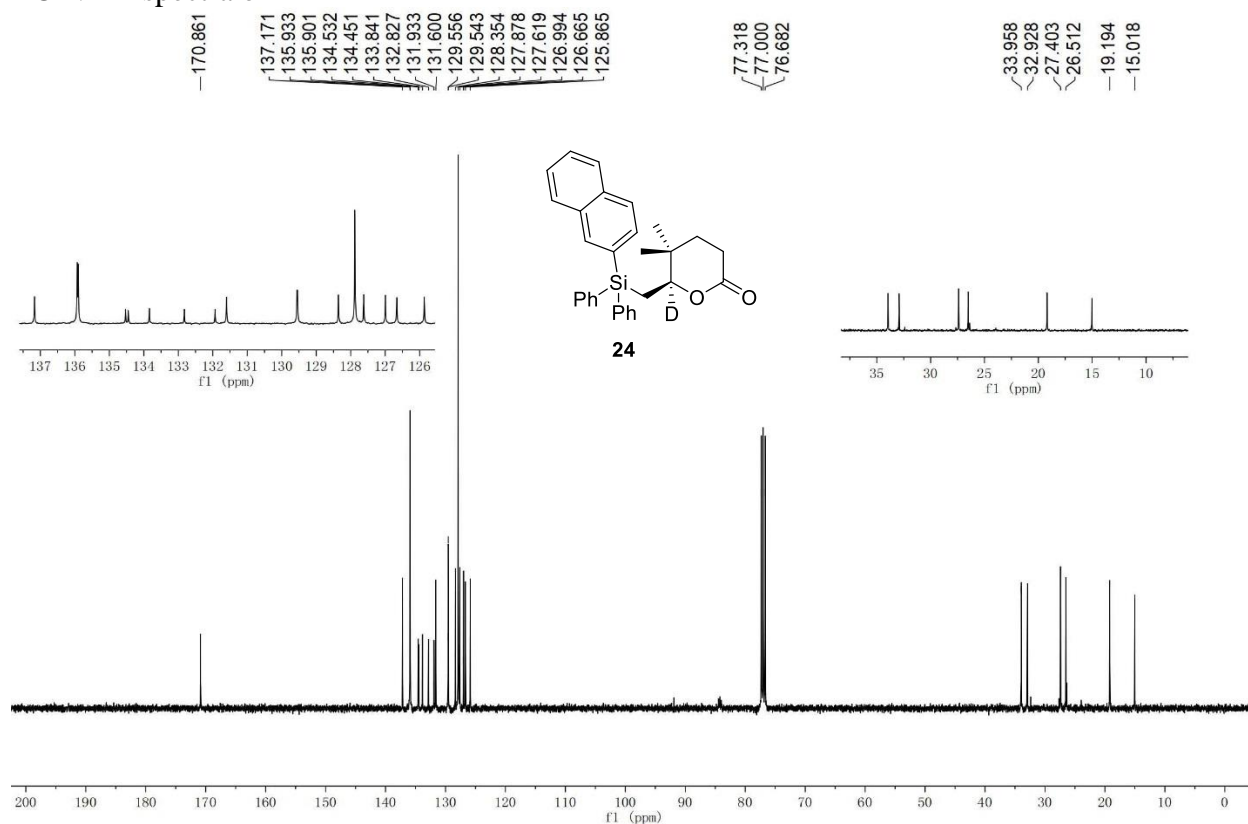

### HPLC spectra of racemic **24**

Data File : (27-RACEMIC)RAM-3-18A.lcd  
 Method File : AD-H-95.5+4.5-1-214.lcm  
 Date Processed : 8/8/2021 12:45:58 PM

#### <Chromatogram View>

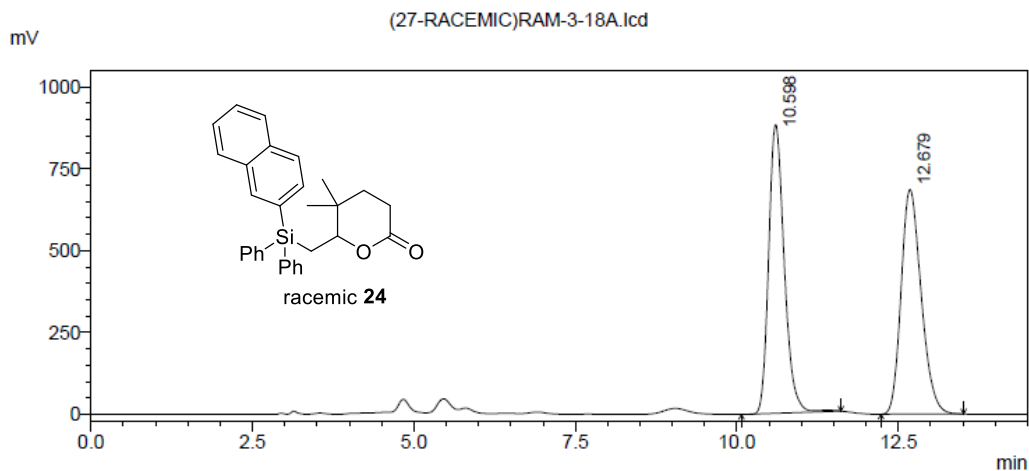

#### <Data Analysis>

| Peak # | Ret. Time | Height  | Area     | Area%   |
|--------|-----------|---------|----------|---------|
| 1      | 10.598    | 881467  | 14786990 | 49.925  |
| 2      | 12.679    | 685909  | 14831129 | 50.075  |
| Total  |           | 1567376 | 29618120 | 100.000 |

# HPLC spectra of 24

Data File : (27-CHIRAL)RAM-3-228.lcd  
 Method File : 3AD-H-95.5-1-214.lcm  
 Date Processed : 8/8/2021 12:46:13 PM

<Chromatogram View>

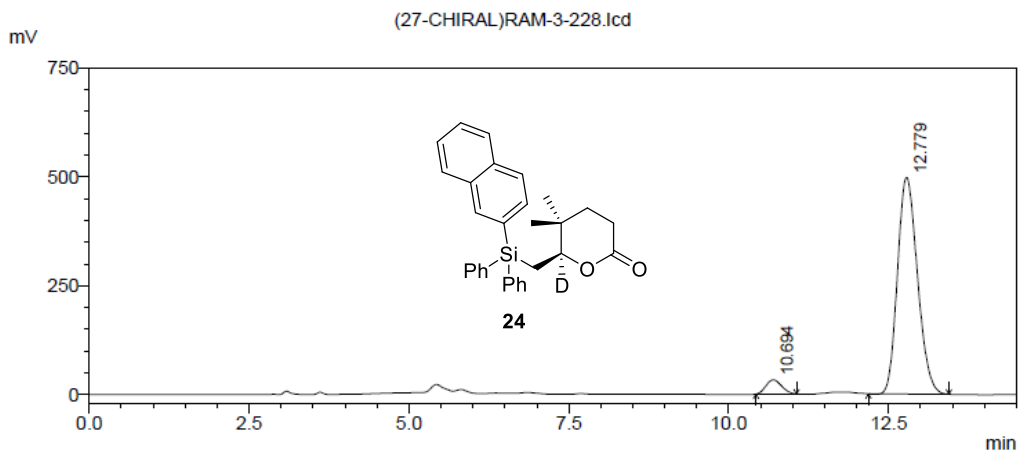

<Data Analysis>

DetA 214nm

| Peak # | Ret. Time | Height | Area     | Area%   |
|--------|-----------|--------|----------|---------|
| 1      | 10.694    | 32648  | 556854   | 4.895   |
| 2      | 12.779    | 497783 | 10820189 | 95.105  |
| Total  |           | 530431 | 11377043 | 100.000 |

# <sup>1</sup>H NMR spectra of 25

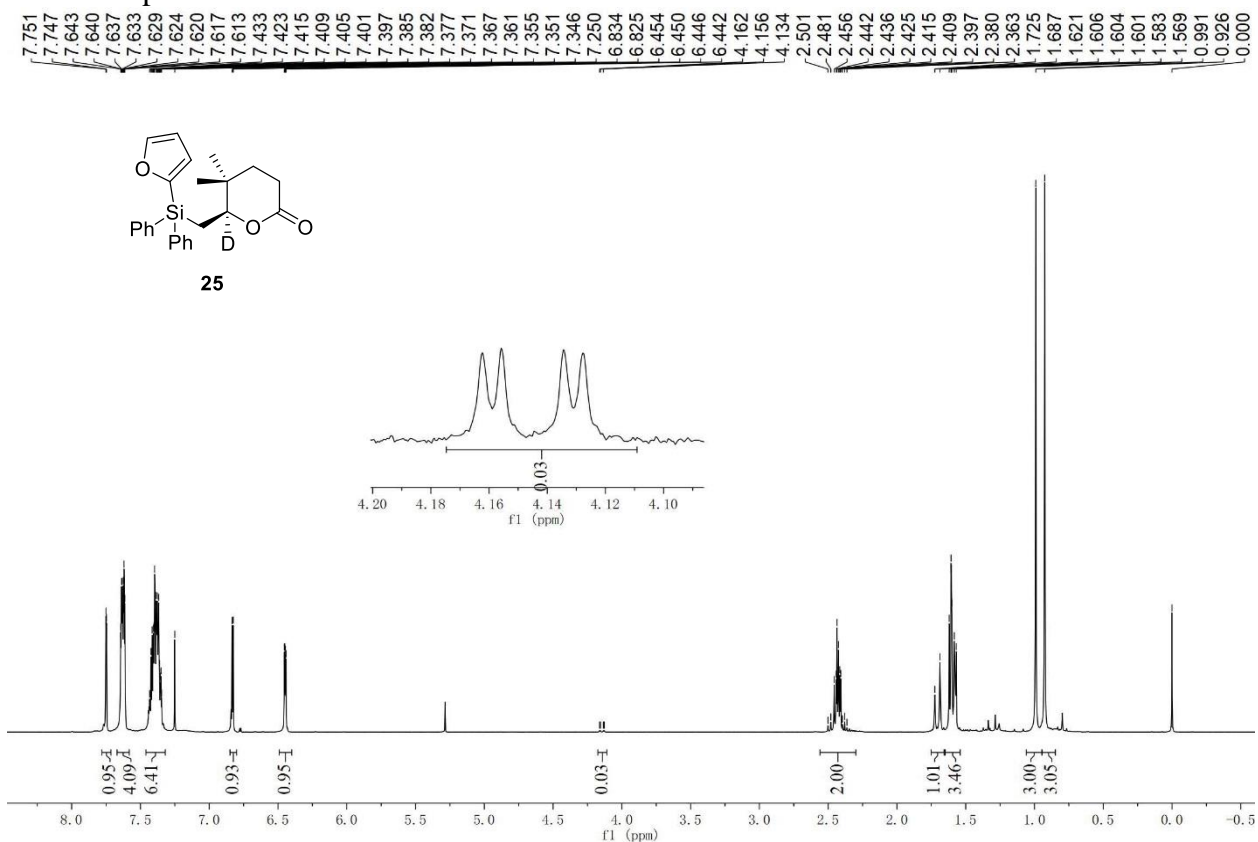

<sup>13</sup>C NMR spectra of **25**

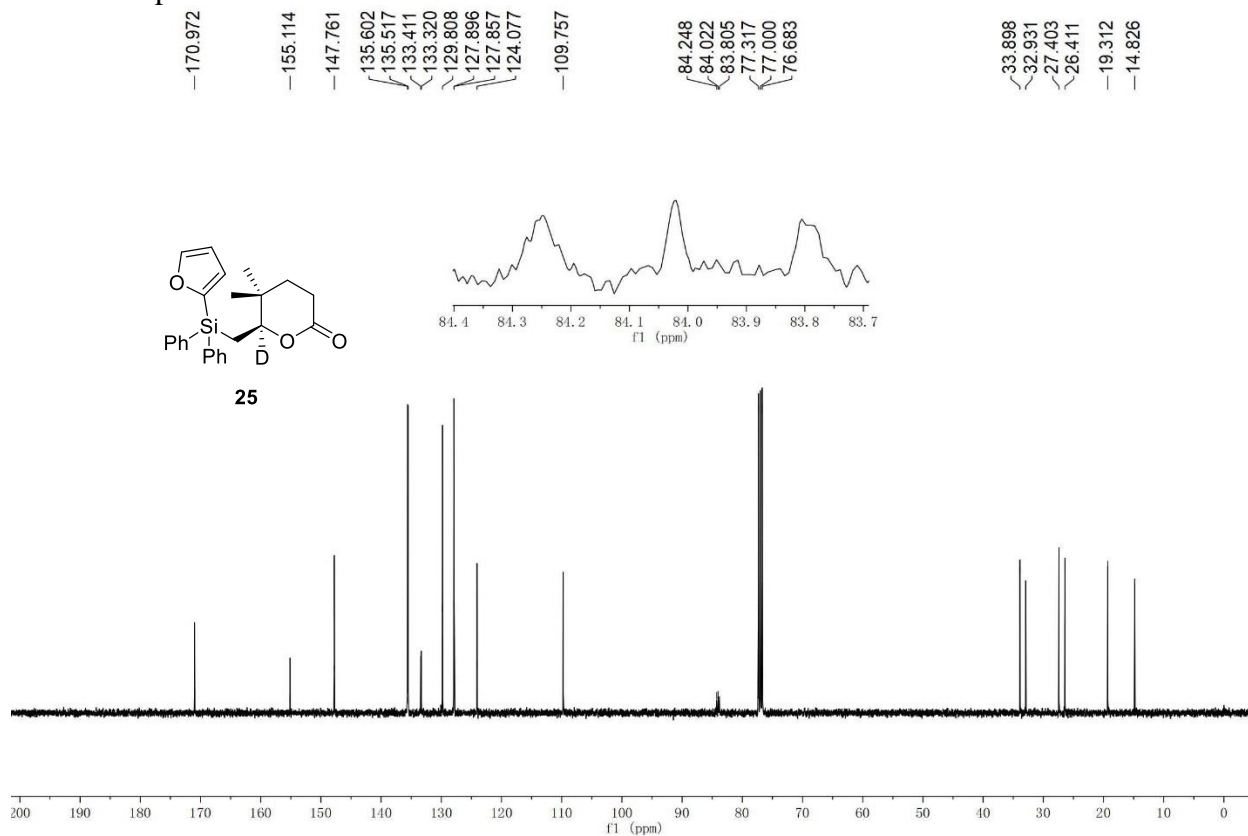

HPLC spectra of racemic **28**

Data File : 28-RAM-2-353-8-racemic.lcd  
 Method File : AD-H-98.7+1.3-1-214 30 min.lcm  
 Date Processed : 8/8/2021 1:29:04 PM

<Chromatogram View>

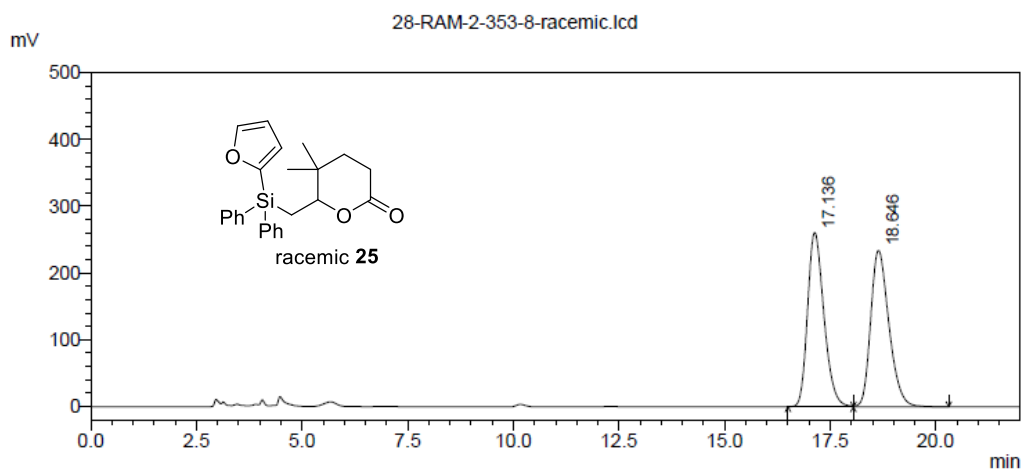

<Data Analysis>

??A 214nm

| Pesk # | Ret. Time | Height | Area     | Area%   |
|--------|-----------|--------|----------|---------|
| 1      | 17.136    | 260784 | 7027681  | 49.929  |
| 2      | 18.646    | 233952 | 7047546  | 50.071  |
| Total  |           | 494737 | 14075227 | 100.000 |

# HPLC spectra of 25

Data File : 28-RAM-2-371-F.lcd  
 Method File : AD-H-98.7+1.3-1-214 30 min.lcm  
 Date Processed : 8/8/2021 1:30:15 PM

<Chromatogram View>

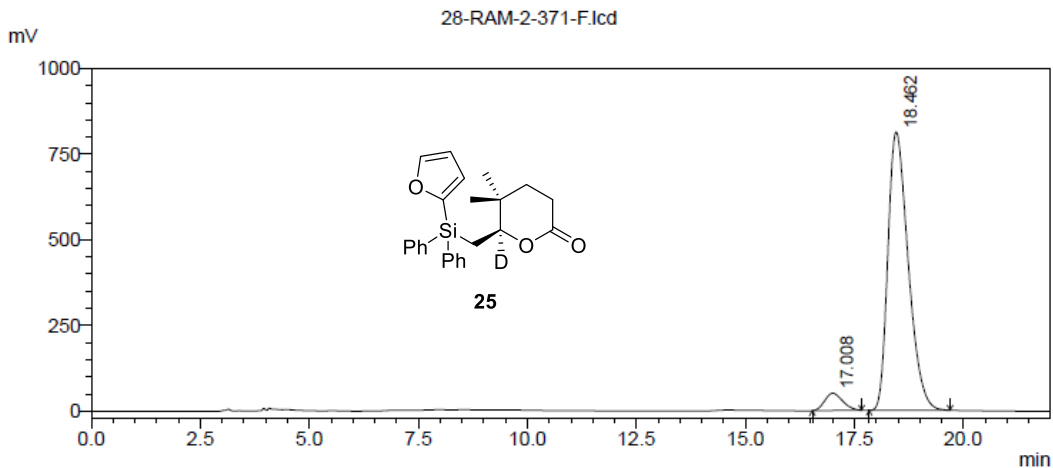

<Data Analysis>

??A214nm

| Peak # | Ret. Time | Height | Area     | Area%   |
|--------|-----------|--------|----------|---------|
| 1      | 17.008    | 50431  | 1439747  | 5.171   |
| 2      | 18.462    | 812594 | 26401258 | 94.829  |
| Total  |           | 863025 | 27841004 | 100.000 |

# <sup>1</sup>H NMR spectra of 26

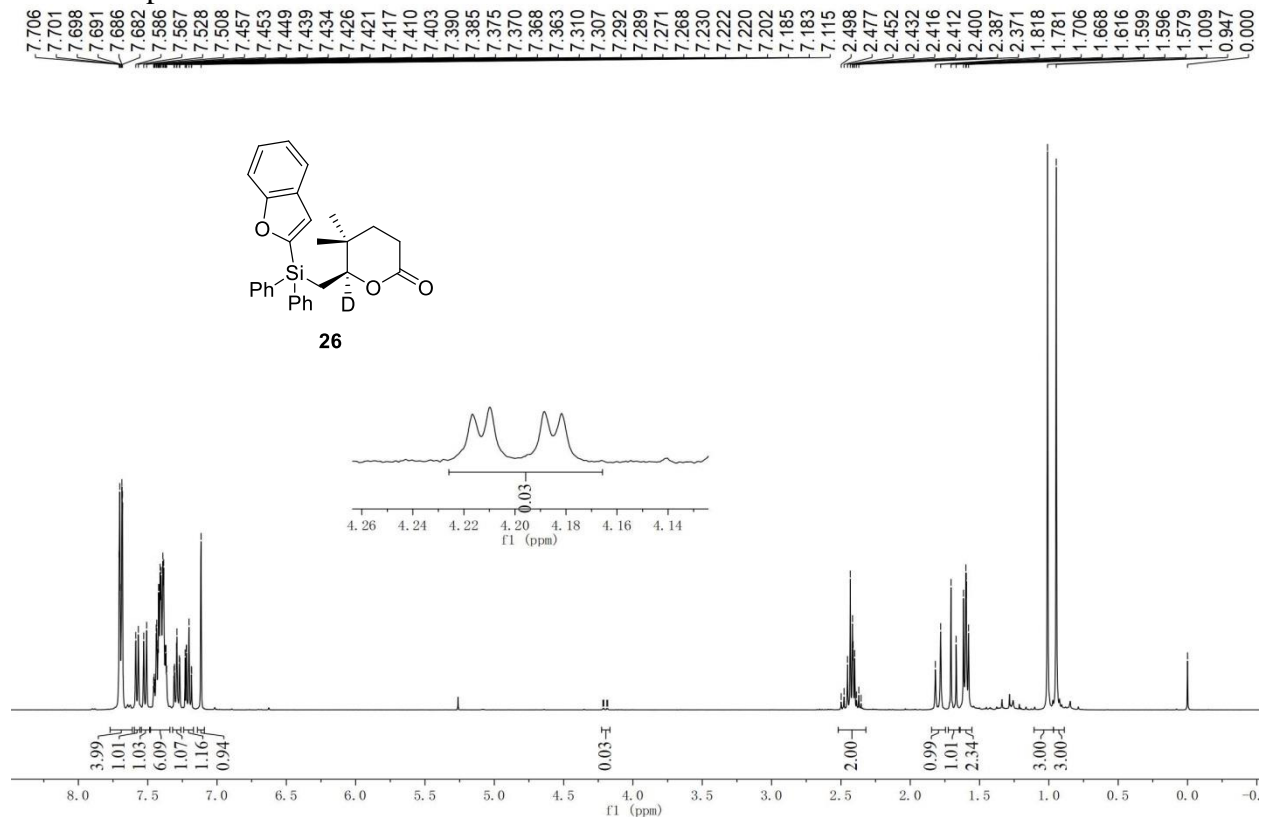

### <sup>13</sup>C NMR spectra of **26**

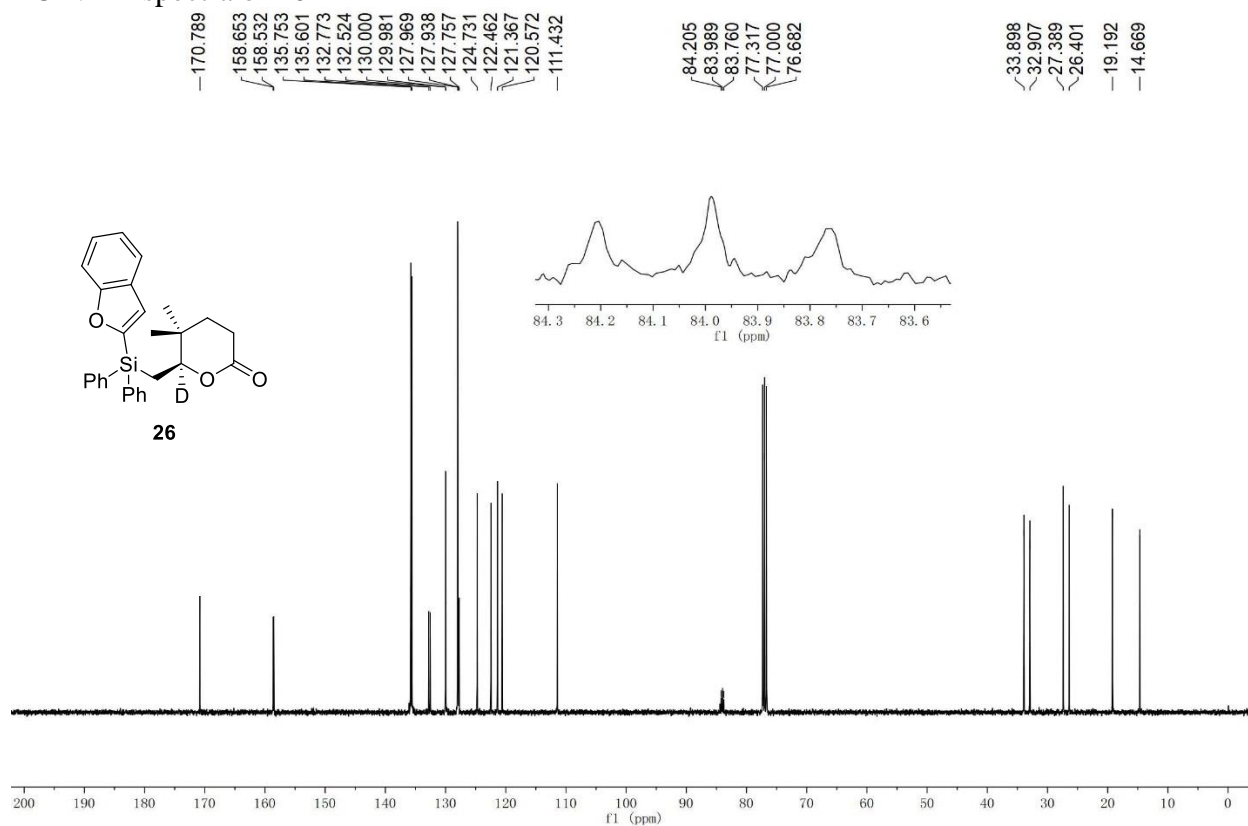

### HPLC spectra of racemic **26**

Data File : 29-RACEMIC-RAM-2-326.lcd  
 Method File : 3AD-H-98-1-214-40MIN.lcm  
 Date Processed : 7/17/2021 12:11:53 PM

#### <Chromatogram View>

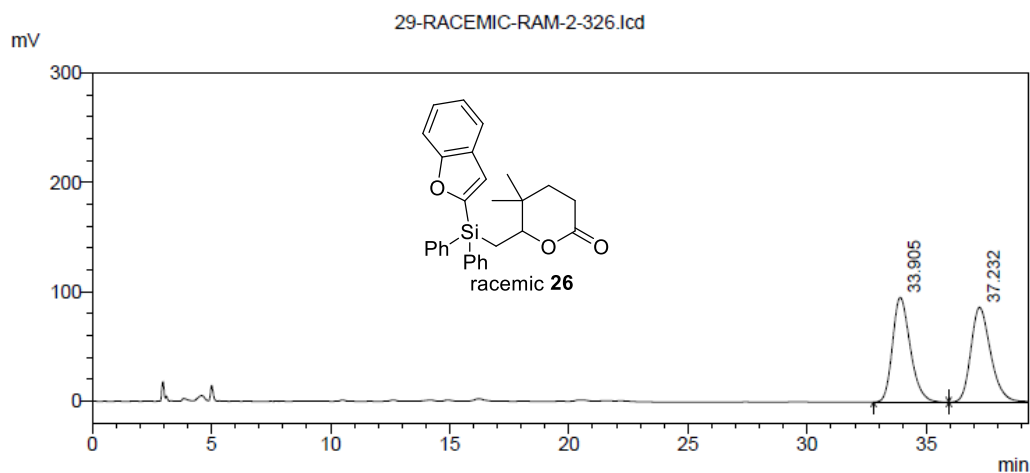

#### <Data Analysis>

| DetA 214nm |           |        |         |         |
|------------|-----------|--------|---------|---------|
| Pesk #     | Ret. Time | Height | Area    | Area%   |
| 1          | 33.905    | 95545  | 4957109 | 49.822  |
| 2          | 37.232    | 86534  | 4992482 | 50.178  |
| Total      |           | 182079 | 9949591 | 100.000 |

# HPLC spectra of 26

Data File : 29-CHIRAL-RAM-2-372.lcd  
 Method File : 3AD-H-98-1-214-40MIN.lcm  
 Date Processed : 7/17/2021 12:14:27 PM

<Chromatogram View>

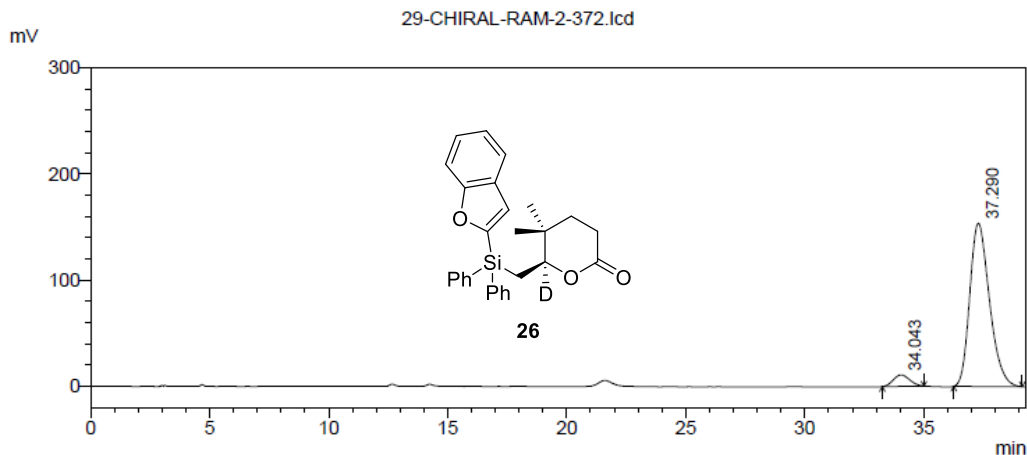

<Data Analysis>

| DetA 214nm |           |        |         |         |
|------------|-----------|--------|---------|---------|
| Pesk #     | Ret. Time | Height | Area    | Area%   |
| 1          | 34.043    | 10826  | 512013  | 5.477   |
| 2          | 37.290    | 153639 | 8836492 | 94.523  |
| Total      |           | 164466 | 9348506 | 100.000 |

# <sup>1</sup>H NMR spectra of 27

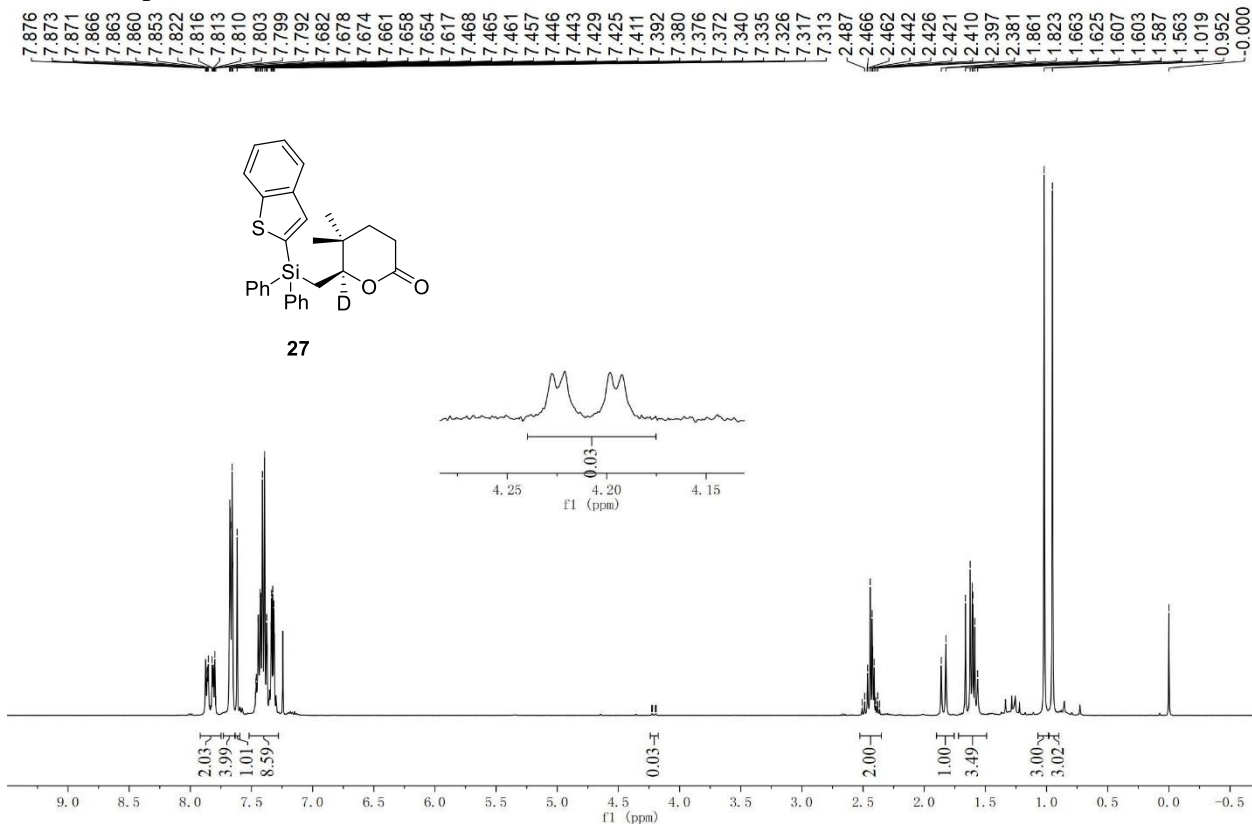

<sup>13</sup>C NMR spectra of **27**

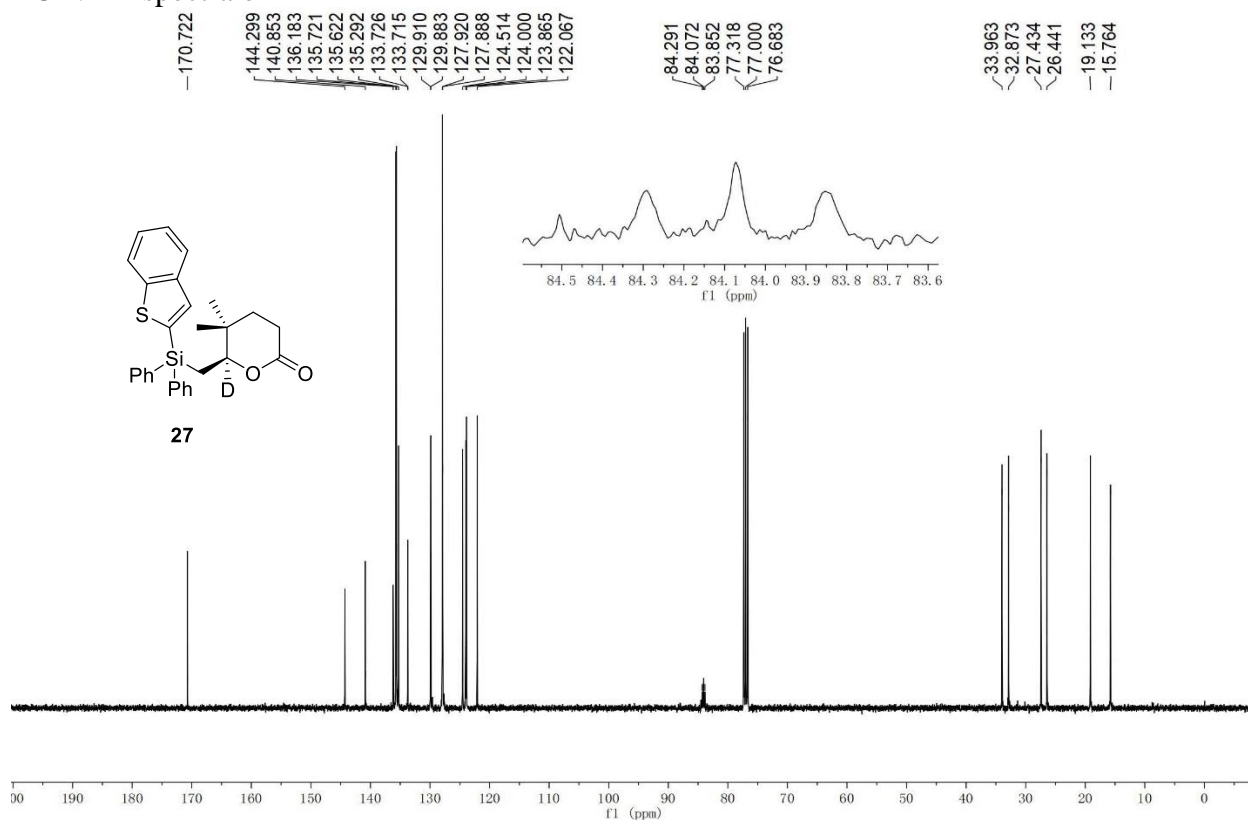

HPLC spectra of racemic **27**

Data File : (30-racemic)-RAM-2-335-.lcd  
 Method File : AD-H-97+3-1-214 50 min.lcm  
 Date Processed : 7/17/2021 12:15:11 PM

<Chromatogram View>

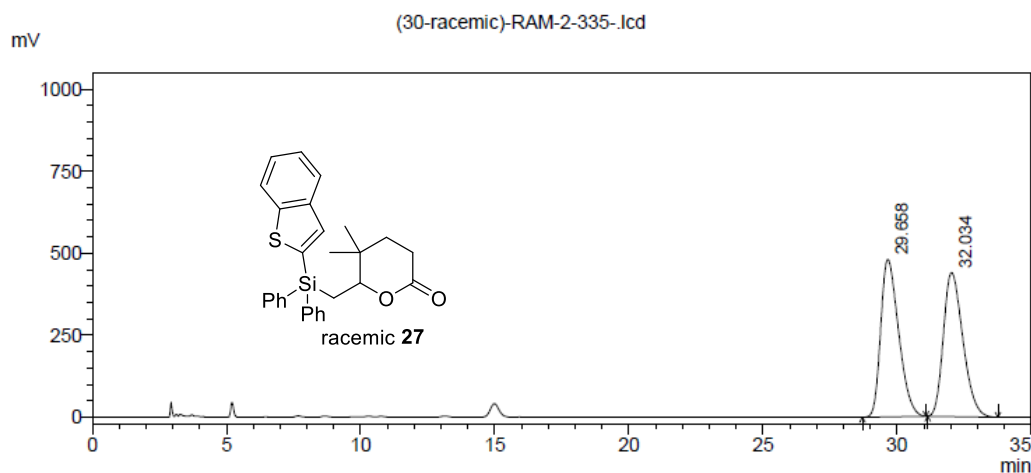

<Data Analysis>

| Pesk # | Ret. Time | Height | Area     | Area%   |
|--------|-----------|--------|----------|---------|
| 1      | 29.658    | 479990 | 22308822 | 50.050  |
| 2      | 32.034    | 439339 | 22264366 | 49.950  |
| Total  |           | 919329 | 44573187 | 100.000 |

# HPLC spectra of 27

Data File : (30-chiral)RAM-2-373-.lcd  
 Method File : AD-H-97+3-1-214 40 min.lcm  
 Date Processed : 7/17/2021 12:15:22 PM

<Chromatogram View>

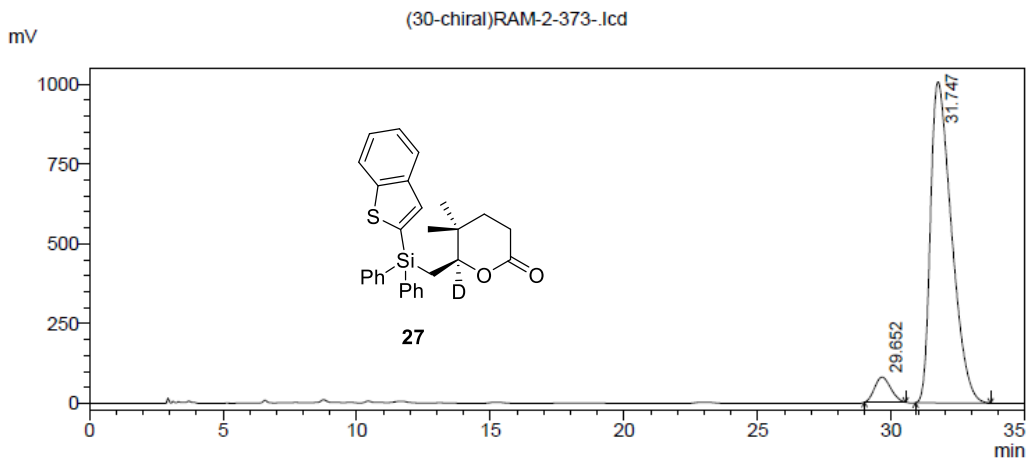

<Data Analysis>

??A 214nm

| Peak # | Ret. Time | Height  | Area     | Area%   |
|--------|-----------|---------|----------|---------|
| 1      | 29.652    | 78719   | 3295191  | 5.635   |
| 2      | 31.747    | 1005560 | 55183772 | 94.365  |
| Total  |           | 1084280 | 58478963 | 100.000 |

# <sup>1</sup>H NMR spectra of 28

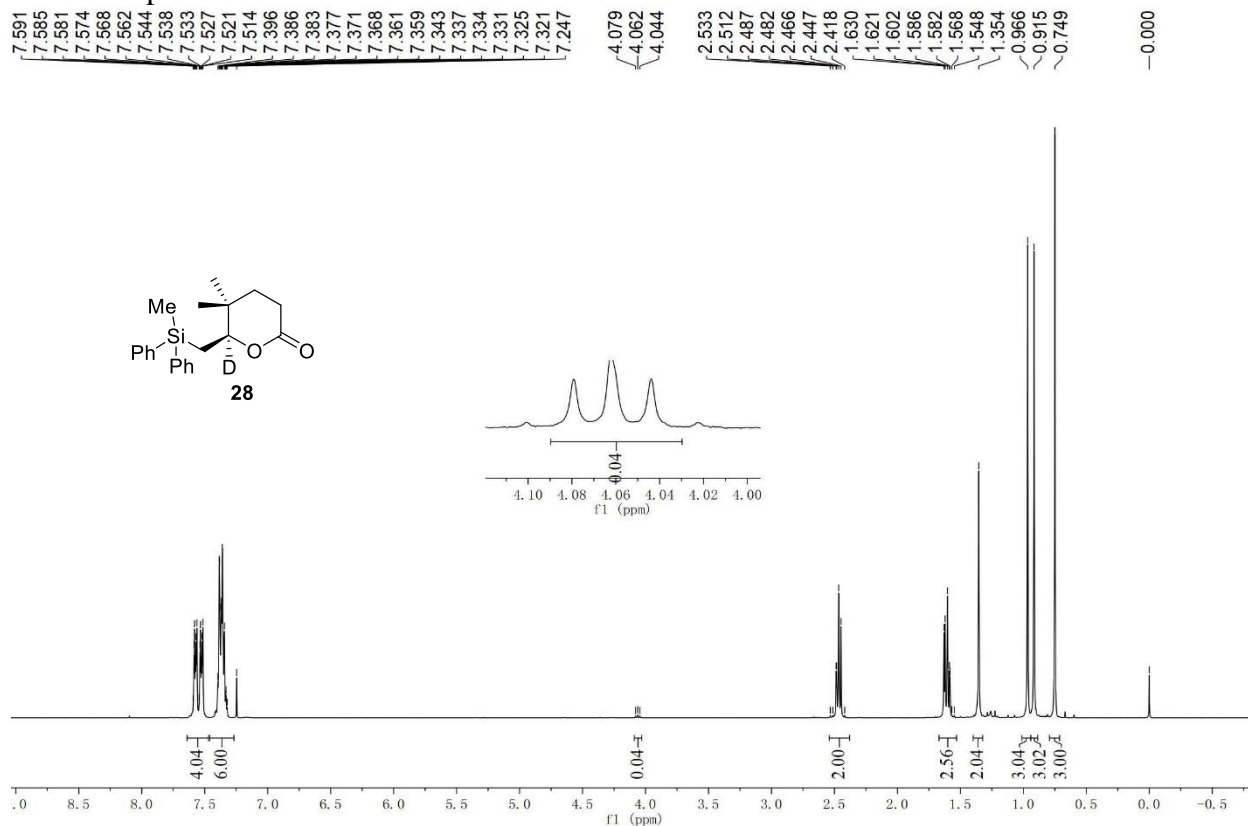



### <sup>13</sup>C NMR spectra of **28**

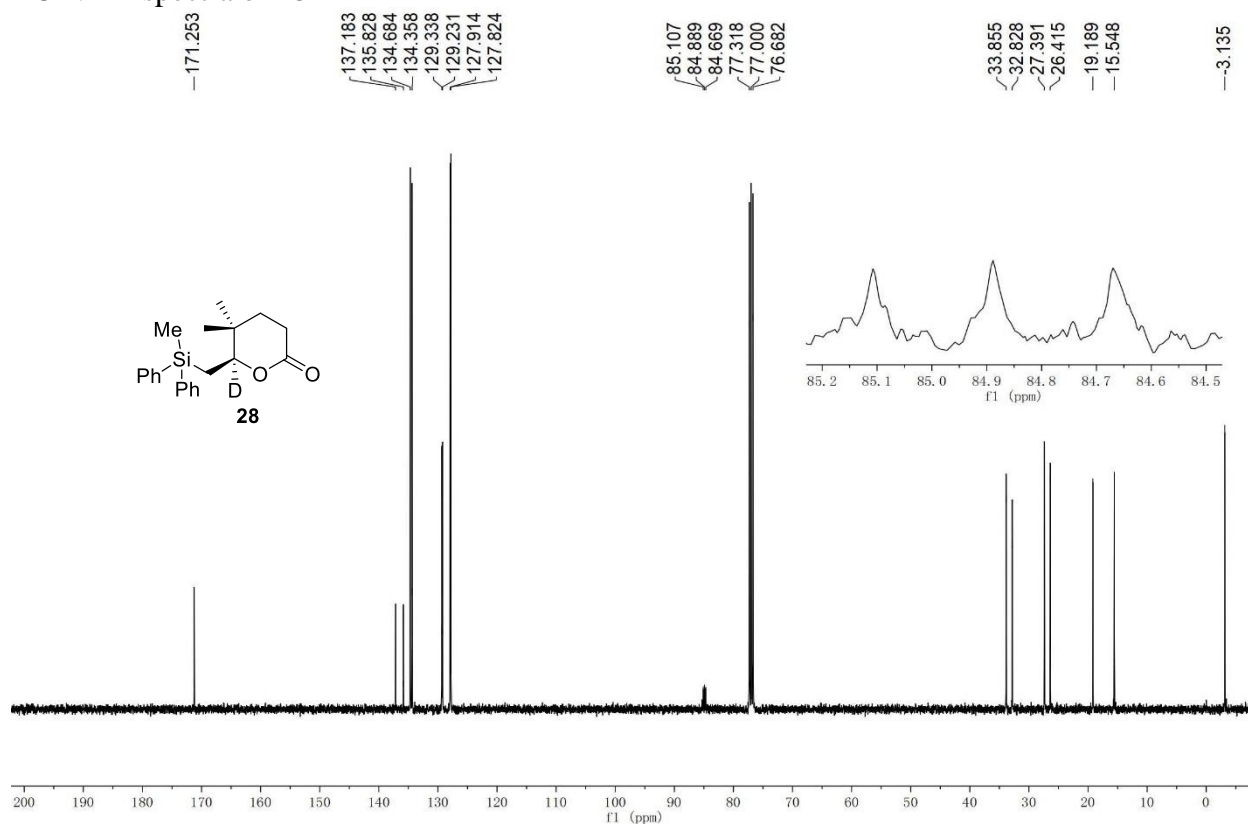

### HPLC spectra of racemic **28**

Data File : 31-RACEMIC-sql-3-41racemic-3.lcd  
 Method File : 3AD-H-99-5-1-214-60min.lcm  
 Date Processed : 7/17/2021 12:19:09 PM

#### <Chromatogram View>

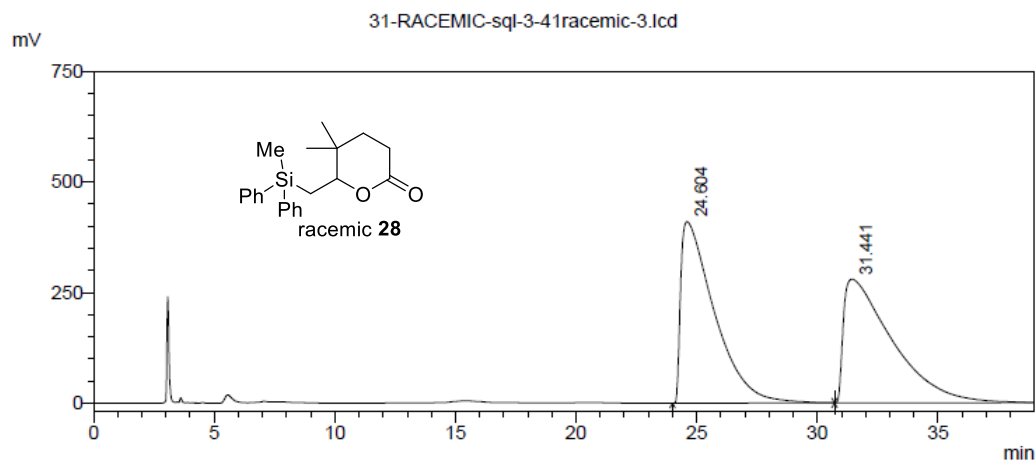

#### <Data Analysis>

| Peak # | Ret. Time | Height | Area     | Area%   |
|--------|-----------|--------|----------|---------|
| 1      | 24.604    | 410169 | 39855154 | 50.255  |
| 2      | 31.441    | 279599 | 39450904 | 49.745  |
| Total  |           | 689768 | 79306058 | 100.000 |

# HPLC spectra of **28**

Data File : 31-CHIRAL-ram-3-9-1.lcd  
 Method File : 3AD-H-99.5-1-214-60min.lcm  
 Date Processed : 7/17/2021 12:18:15 PM

<Chromatogram View>

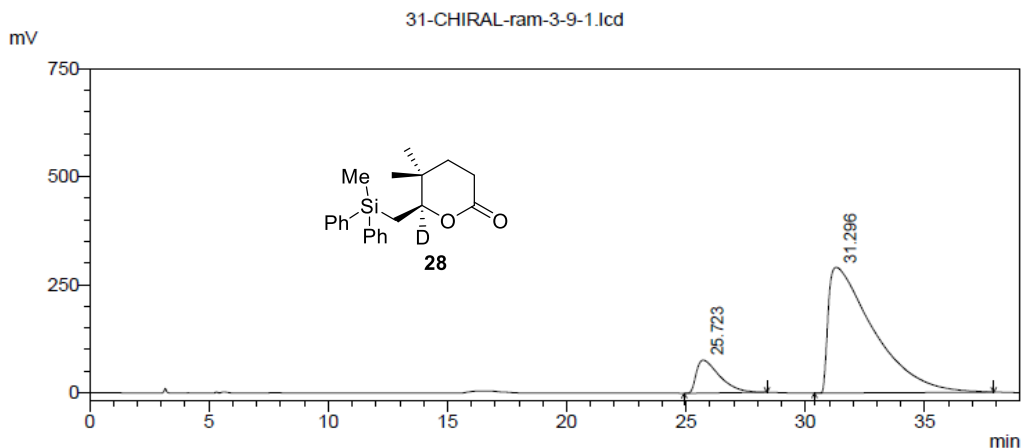

<Data Analysis>

| DetA 214nm |           |        |          |         |
|------------|-----------|--------|----------|---------|
| Pesk #     | Ret. Time | Height | Area     | Area%   |
| 1          | 25.723    | 76056  | 5183828  | 11.897  |
| 2          | 31.296    | 290709 | 38390047 | 88.103  |
| Total      |           | 366764 | 43573875 | 100.000 |

# <sup>1</sup>H NMR spectra of **29**

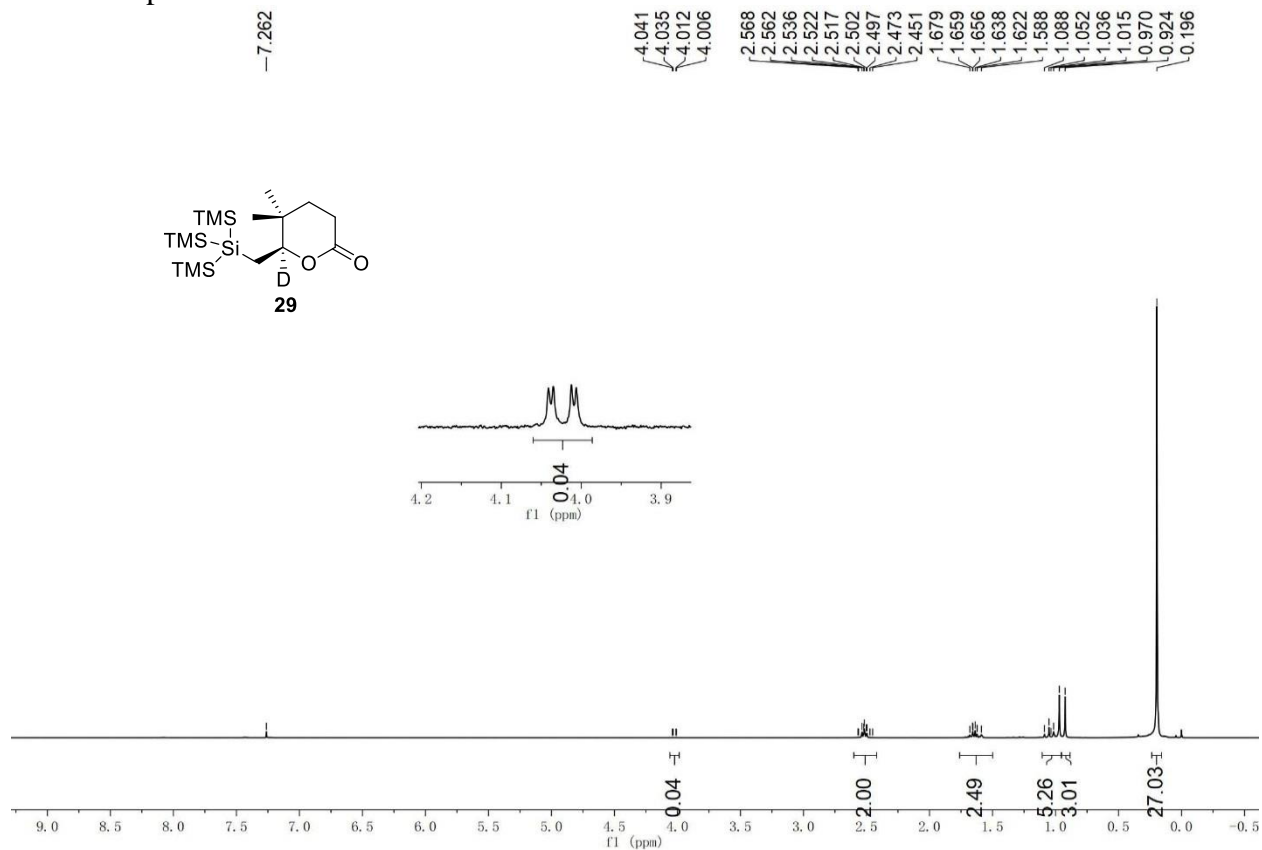

<sup>13</sup>C NMR spectra of **29**

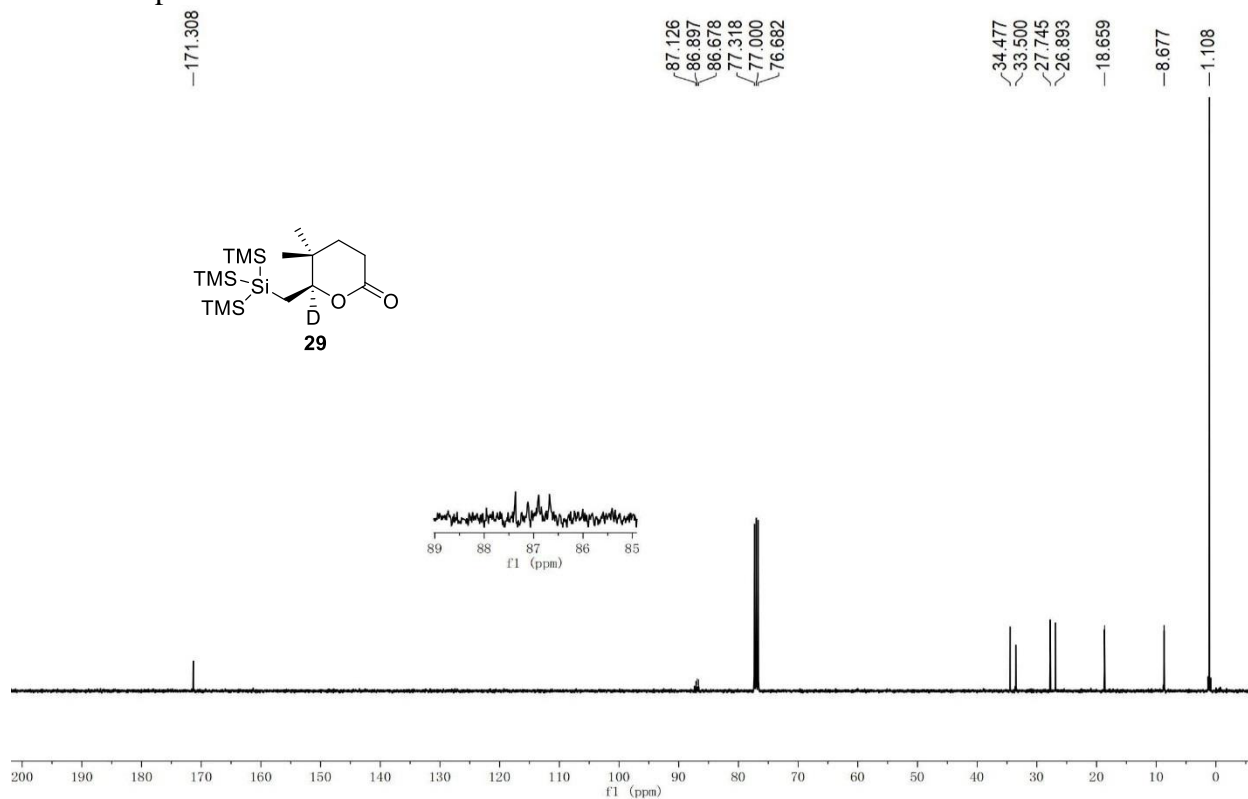

HPLC spectra of racemic **29**

Data File : 32-RACEMIC-SQL-3-14.lcd  
 Method File : 40D-H-99.3-0.5-214-20min.lcm  
 Date Processed : 7/17/2021 12:25:19 PM

<Chromatogram View>

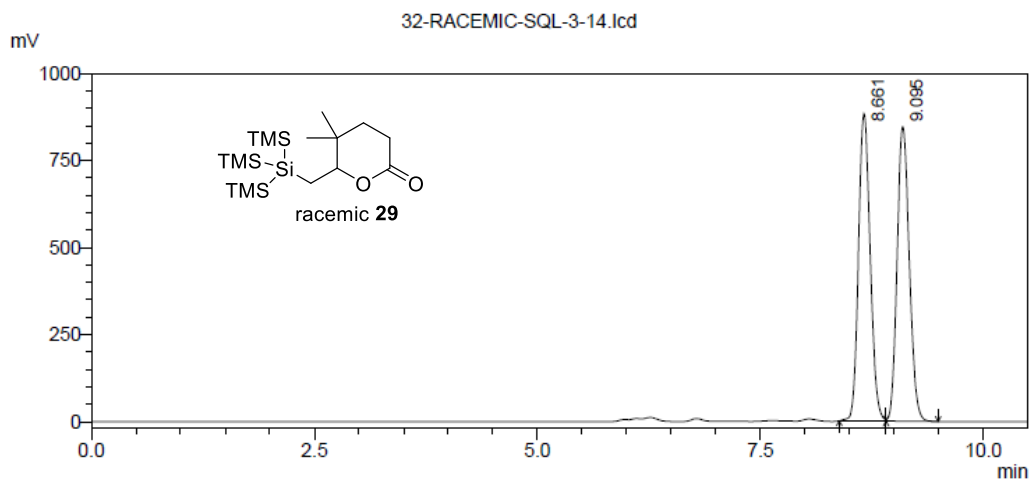

<Data Analysis>

| Pesk # | Ret. Time | Height  | Area     | Area%   |
|--------|-----------|---------|----------|---------|
| 1      | 8.661     | 882522  | 8050036  | 50.009  |
| 2      | 9.095     | 845124  | 8047288  | 49.991  |
| Total  |           | 1727646 | 16097324 | 100.000 |

# HPLC spectra of 29

Data File : 32-CHIRAL-ram-2-348-3.lcd  
 Method File : 4OD-H-99.3-0.5-214-20min.lcm  
 Date Processed : 7/17/2021 12:24:43 PM

<Chromatogram View>

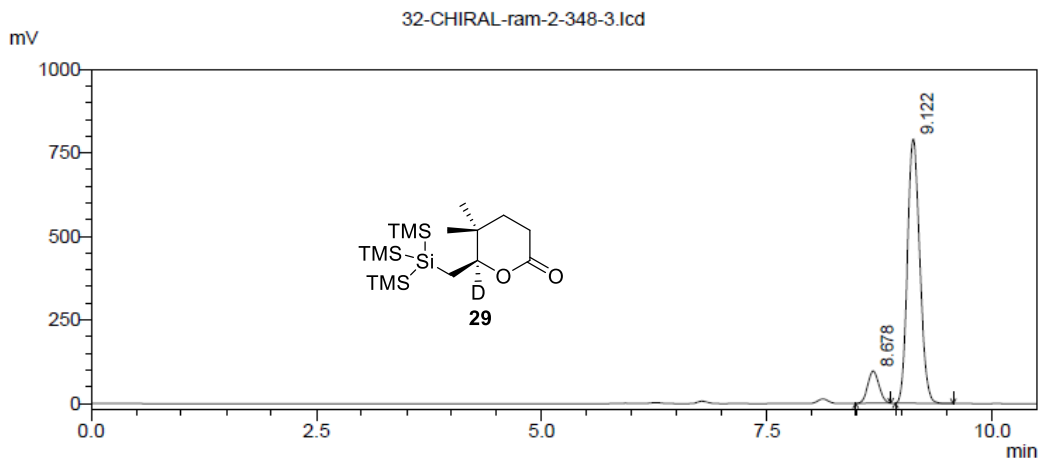

<Data Analysis>

| Peak # | Ret. Time | Height | Area    | Area%   |
|--------|-----------|--------|---------|---------|
| 1      | 8.678     | 96365  | 839248  | 10.034  |
| 2      | 9.122     | 790474 | 7525139 | 89.966  |
| Total  |           | 886839 | 8364388 | 100.000 |

# <sup>1</sup>H NMR spectra of 30

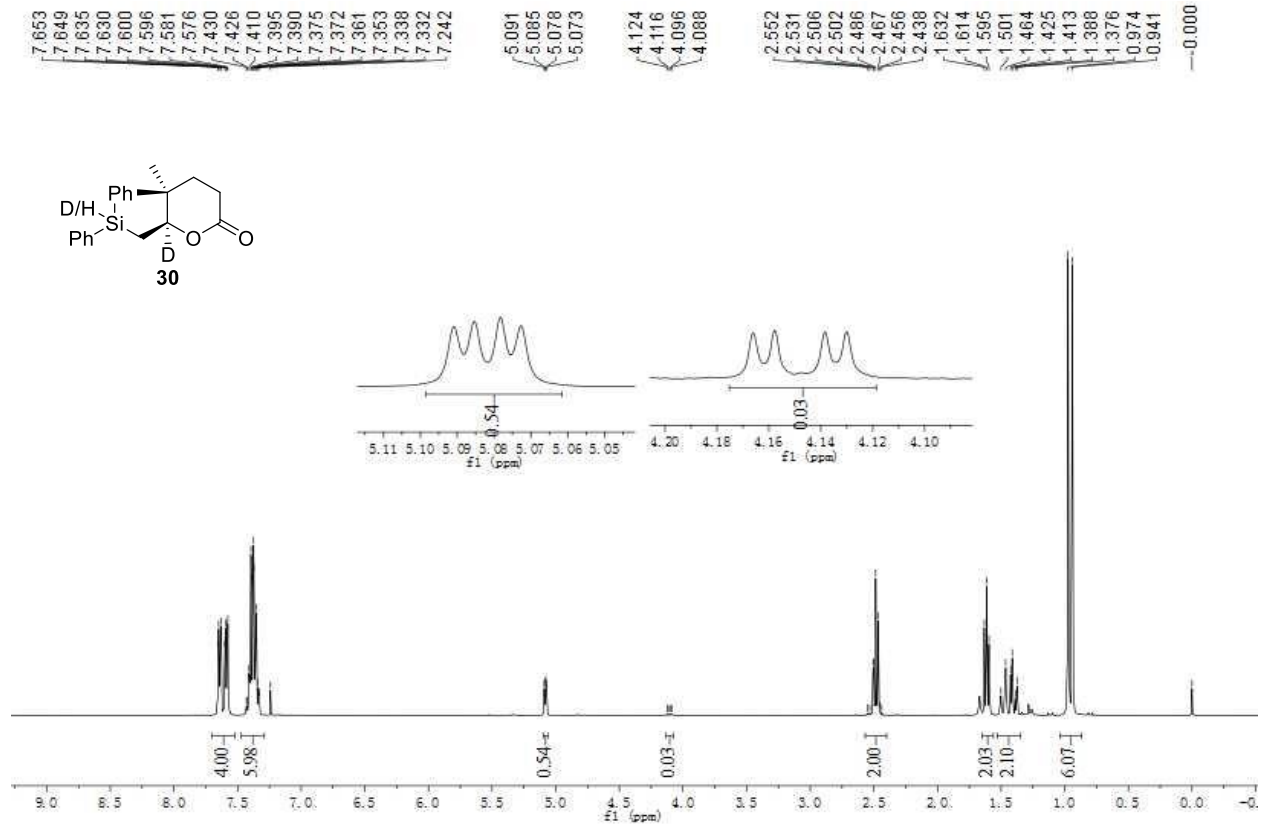

### <sup>13</sup>C NMR spectra of **30**

ram-2-318b-carbon.1.fid

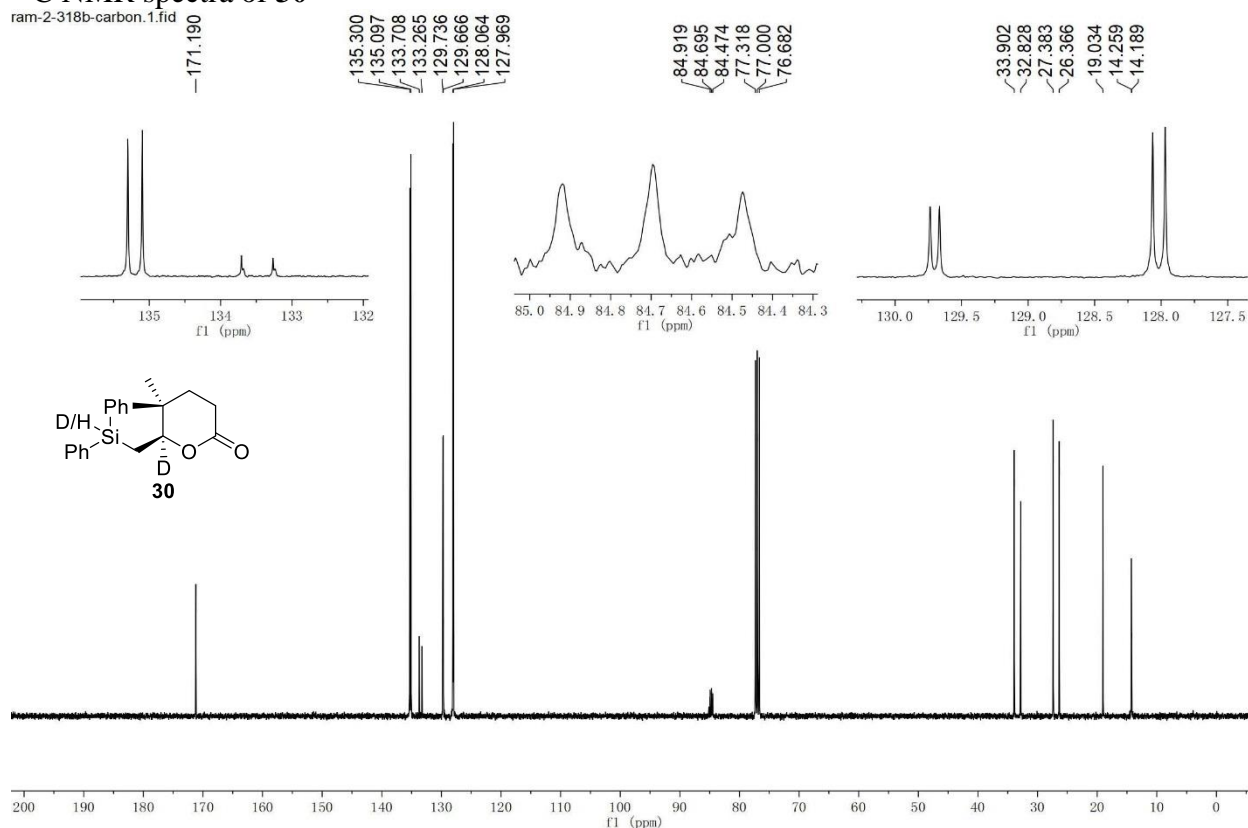

### HPLC spectra of racemic **30**

Data File : (33-RACEMIC)-SQL-5-202-6.lcd  
 Method File : 1OJ-H-98.5-1-214.lcm  
 Date Processed : 7/17/2021 12:25:57 PM

<Chromatogram View>

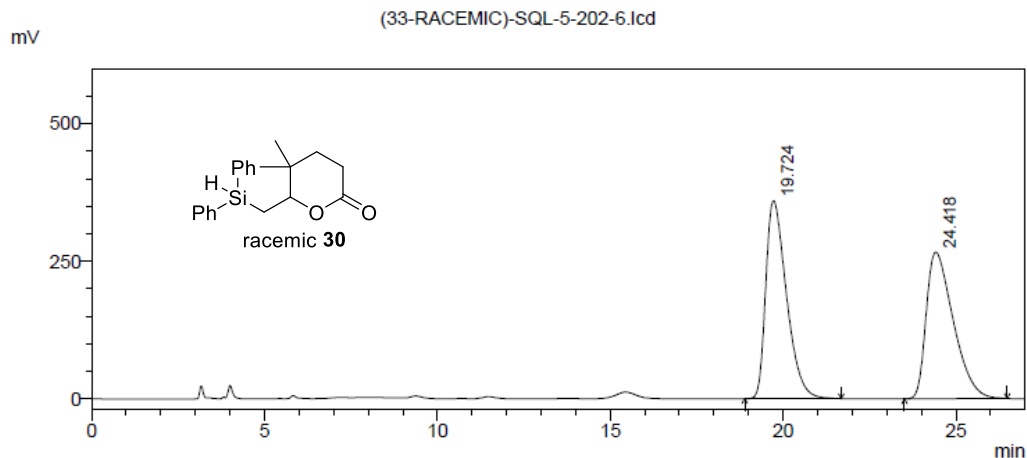

<Data Analysis>

| Pesk # | Ret. Time | Height | Area     | Area%   |
|--------|-----------|--------|----------|---------|
| 1      | 19.724    | 359585 | 14986446 | 50.820  |
| 2      | 24.418    | 266194 | 14502857 | 49.180  |
| Total  |           | 625779 | 29489303 | 100.000 |

# HPLC spectra of 30

Data File : (33-CHIRAL)ram-3-318b001.lcd  
 Method File : 1OJ-H-98.5-1-214.lcm  
 Date Processed : 7/17/2021 12:26:23 PM

## <Chromatogram View>

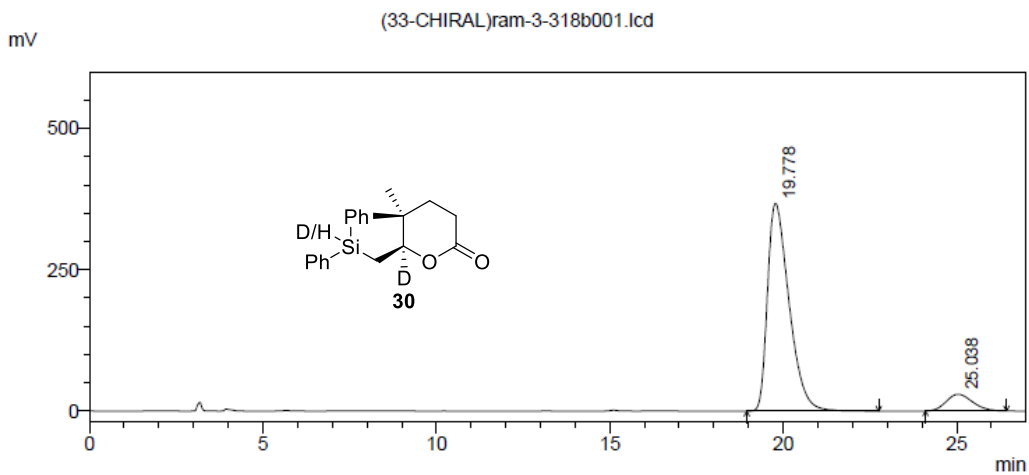

## <Data Analysis>

DetA 214nm

| Peak # | Ret. Time | Height | Area     | Area%   |
|--------|-----------|--------|----------|---------|
| 1      | 19.778    | 367860 | 15960054 | 90.998  |
| 2      | 25.038    | 29684  | 1578929  | 9.002   |
| Total  |           | 397543 | 17538983 | 100.000 |

# <sup>1</sup>H NMR spectra of 31

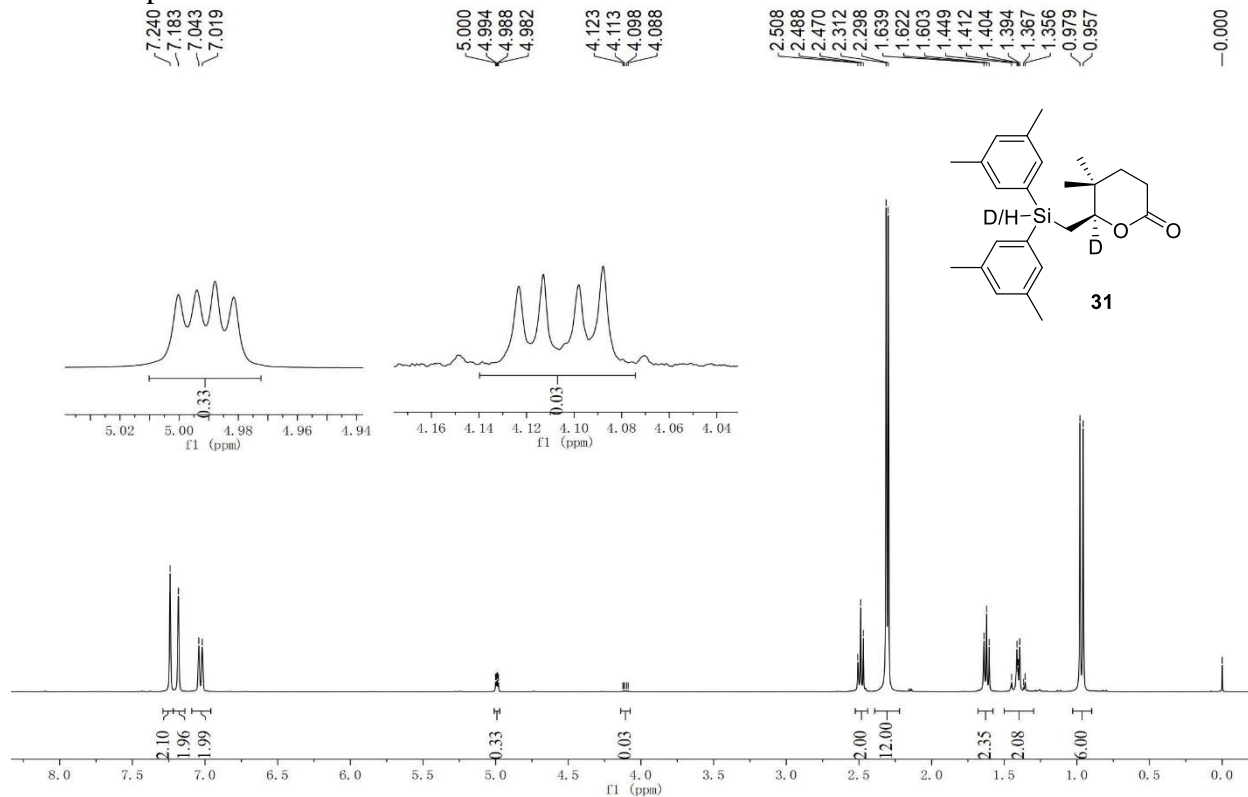

### <sup>13</sup>C NMR spectra of **31**

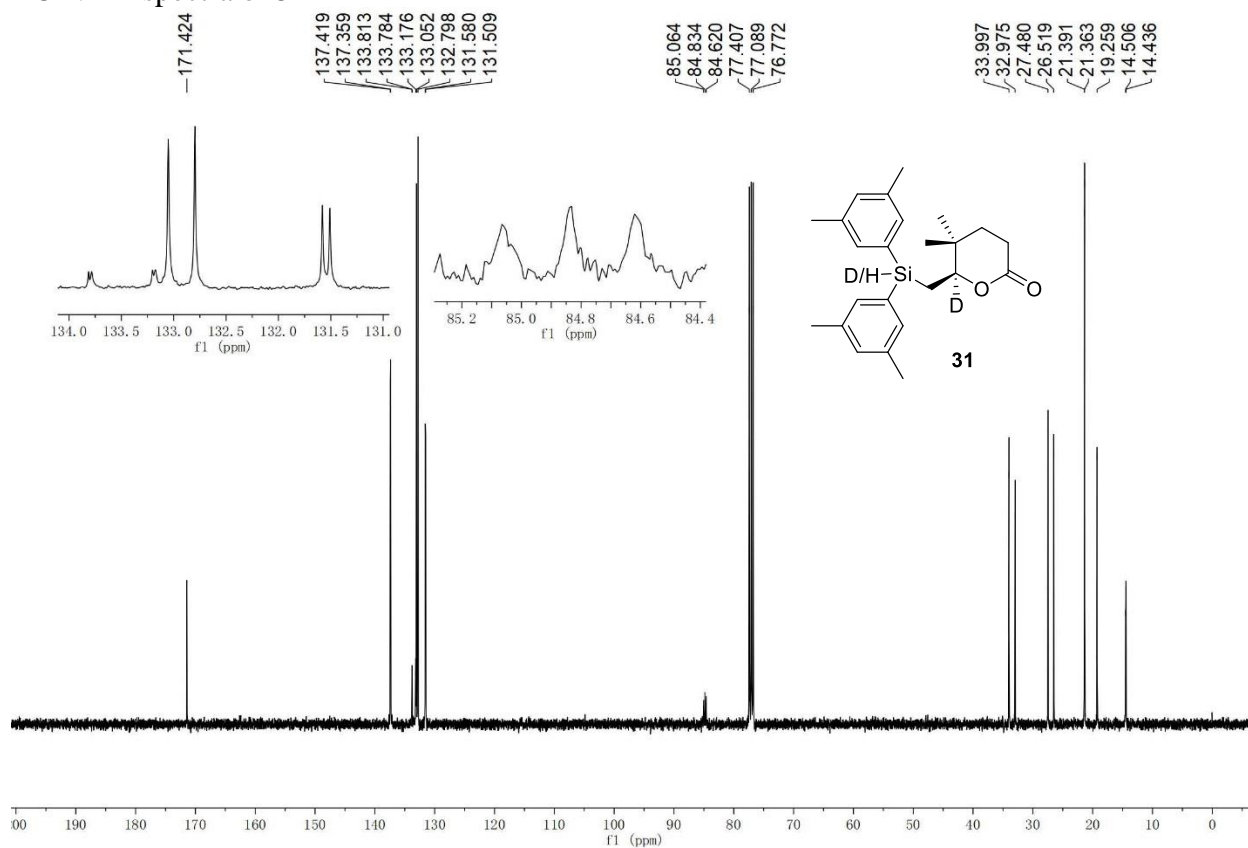

### HPLC spectra of racemic **31**

Data File : (34-racemic)RAM-3-8A.lcd  
 Method File : AD-H-99+1-1.0-214.lcm  
 Date Processed : 7/17/2021 12:26:48 PM

#### <Chromatogram View>

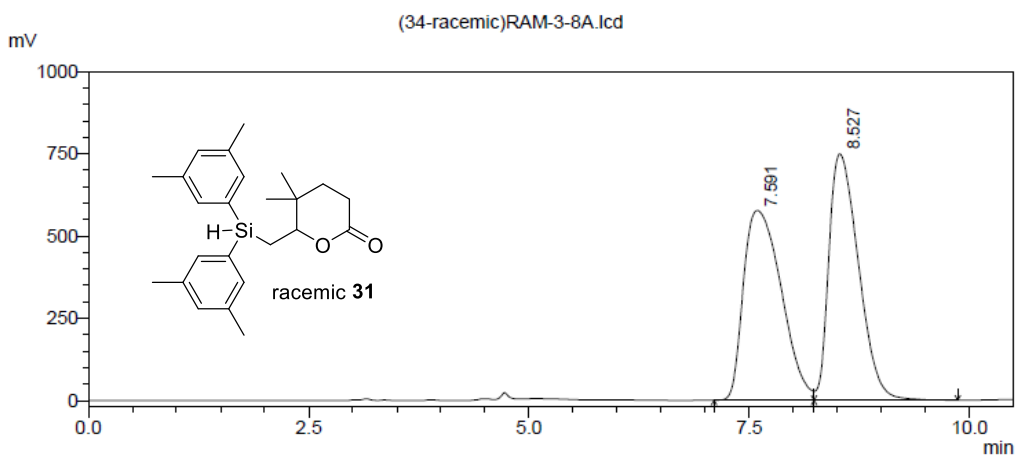

#### <Data Analysis>

| ???A 214nm |           |         |          |         |
|------------|-----------|---------|----------|---------|
| Pesk #     | Ret. Time | Height  | Area     | Area%   |
| 1          | 7.591     | 576544  | 17197938 | 49.504  |
| 2          | 8.527     | 748455  | 17542280 | 50.496  |
| Total      |           | 1324999 | 34740218 | 100.000 |

# HPLC spectra of 31

Data File : (34-chiral)RAM-3-8b.lcd  
 Method File : AD-H-99+1-1.0-214.lcm  
 Date Processed : 7/17/2021 12:27:05 PM

<Chromatogram View>

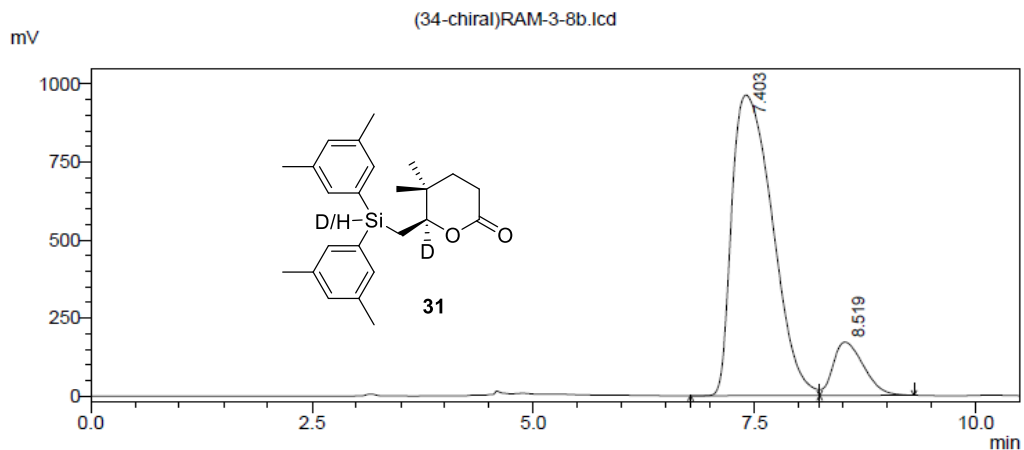

<Data Analysis>

??A 214nm

| Peak # | Ret. Time | Height  | Area     | Area%   |
|--------|-----------|---------|----------|---------|
| 1      | 7.403     | 962081  | 30697991 | 88.227  |
| 2      | 8.519     | 170584  | 4096189  | 11.773  |
| Total  |           | 1132665 | 34794180 | 100.000 |

# <sup>1</sup>H NMR spectra of 32

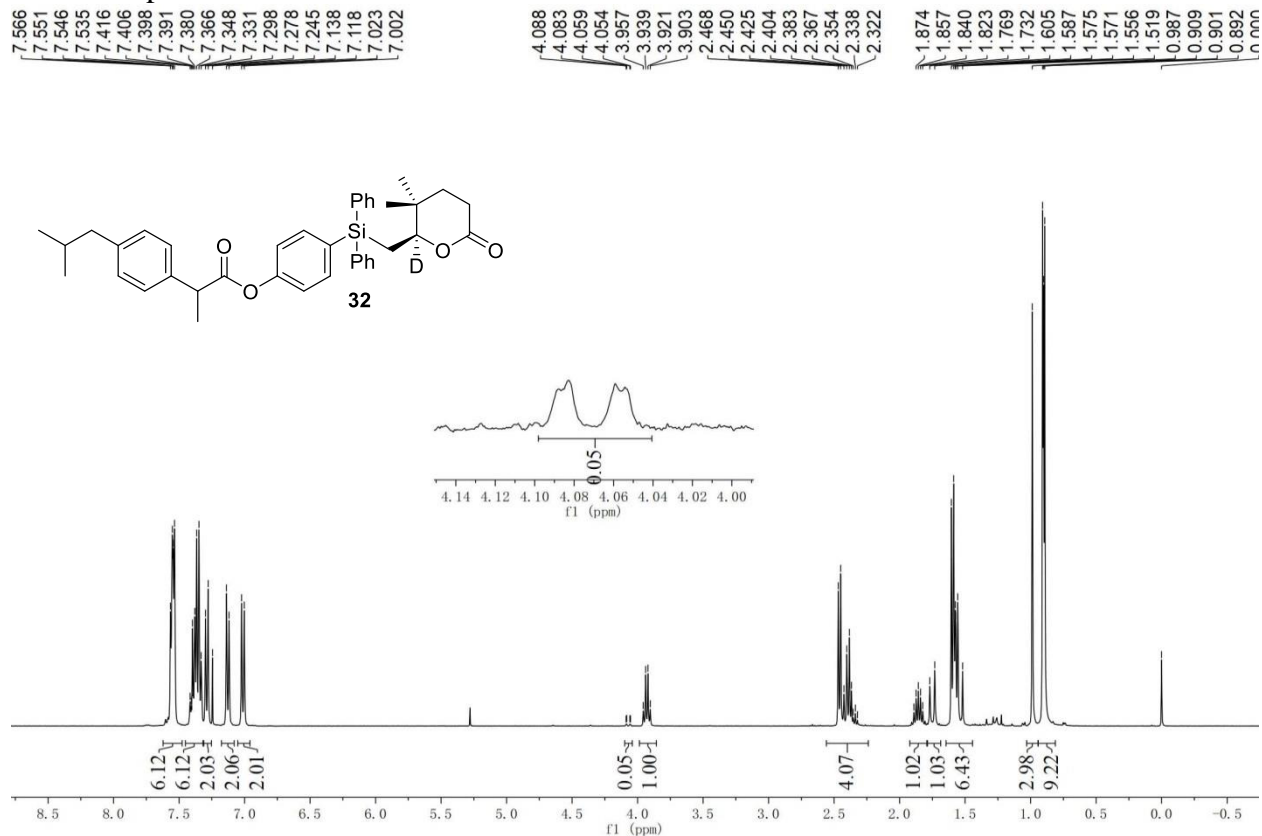



### <sup>13</sup>C NMR spectra of **32**

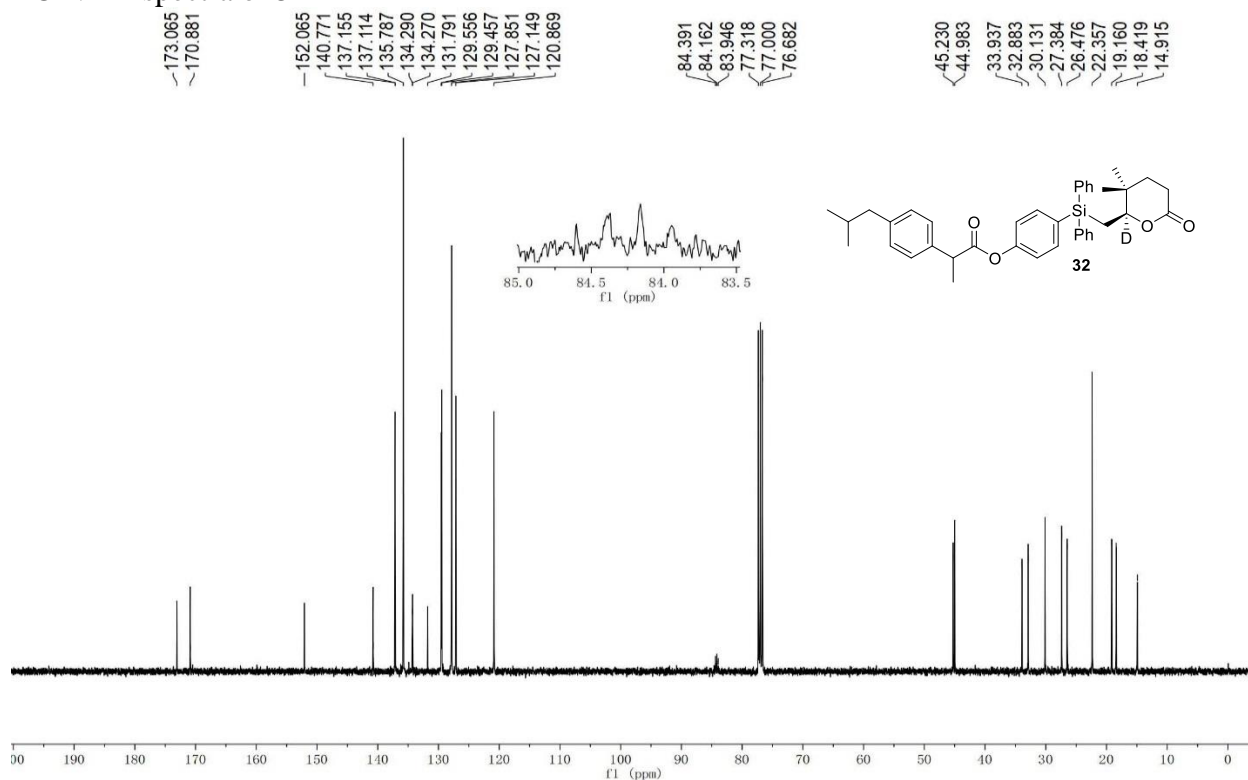

### HPLC spectra of racemic **35**

Data File : (35-racemic)RAM-3-89A.lcd  
 Method File : IC-H-90-0.5-214.lcm  
 Date Processed : 7/17/2021 12:27:53 PM

#### <Chromatogram View>

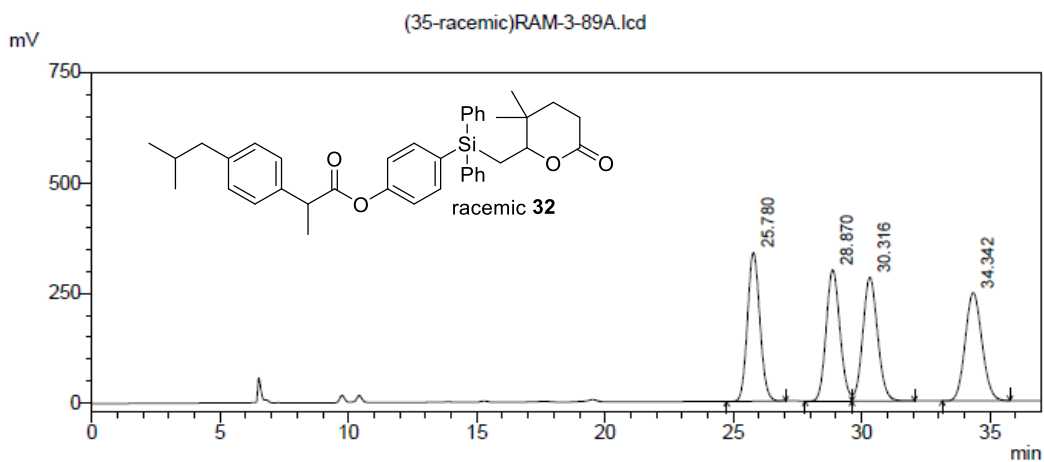

#### <Data Analysis>

| Peak # | Ret. Time | Height  | Area     | Area%   |
|--------|-----------|---------|----------|---------|
| 1      | 25.780    | 337052  | 11311214 | 25.264  |
| 2      | 28.870    | 296808  | 11076879 | 24.741  |
| 3      | 30.316    | 279784  | 11230702 | 25.085  |
| 4      | 34.342    | 244735  | 11152547 | 24.910  |
| Total  |           | 1158379 | 44771340 | 100.000 |

# HPLC spectra of **32**

Data File : (35-chiral)RAM-3-89B.lcd  
 Method File : IC-H-90-0.5-214.lcm  
 Date Processed : 7/17/2021 12:27:35 PM

<Chromatogram View>

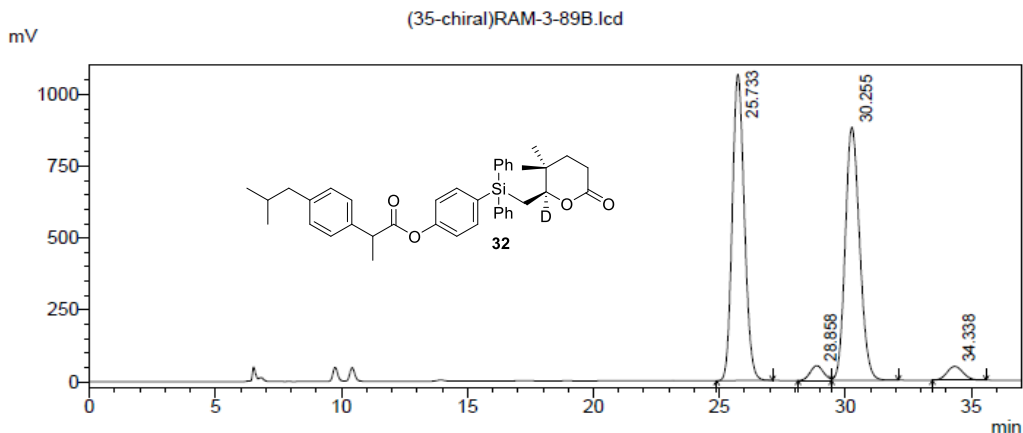

<Data Analysis>

| Peak # | Ret. Time | Height  | Area     | Area%   |
|--------|-----------|---------|----------|---------|
| 1      | 25.733    | 1064950 | 35480169 | 47.582  |
| 2      | 28.858    | 51185   | 1860322  | 2.495   |
| 3      | 30.255    | 880327  | 35070991 | 47.033  |
| 4      | 34.338    | 48224   | 2155190  | 2.890   |
| Total  |           | 2044687 | 74566673 | 100.000 |

# <sup>1</sup>H NMR spectra of **33**

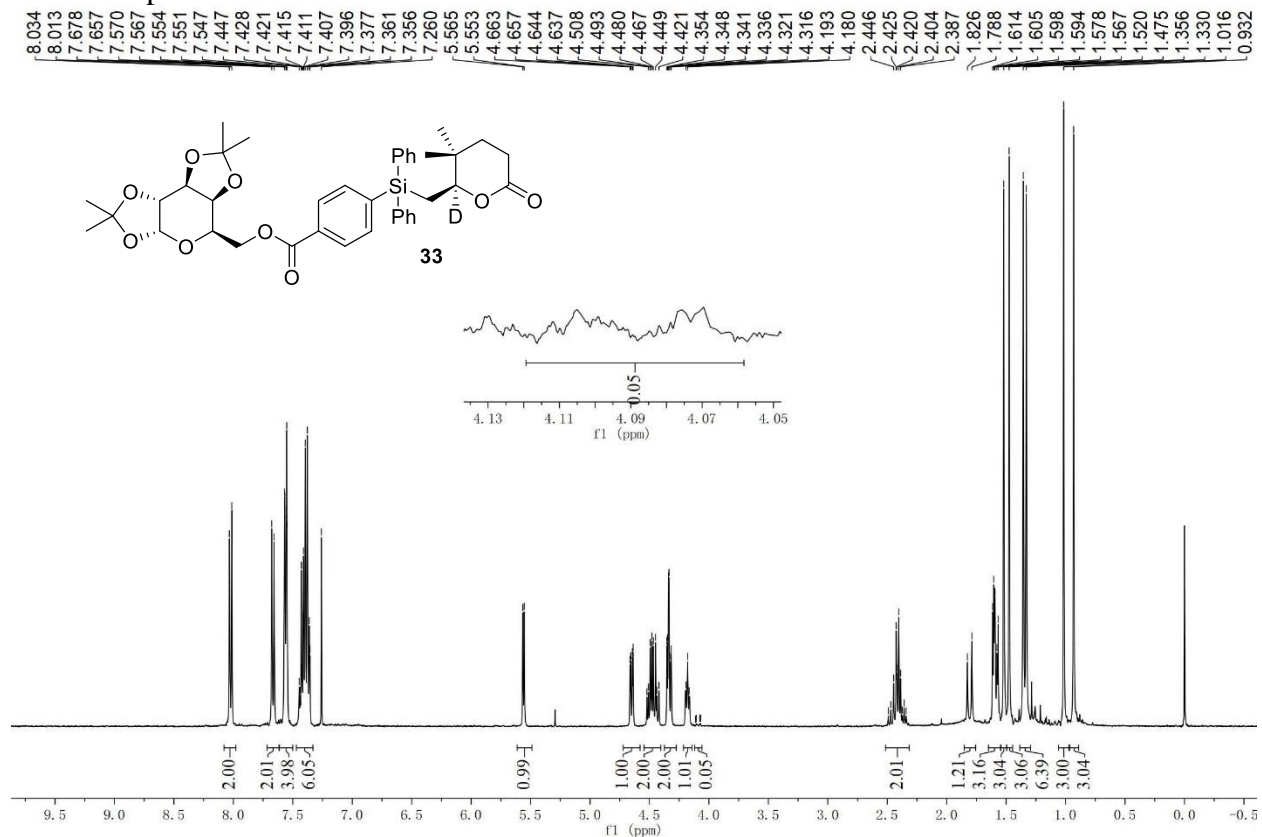

### <sup>13</sup>C NMR spectra of **33**

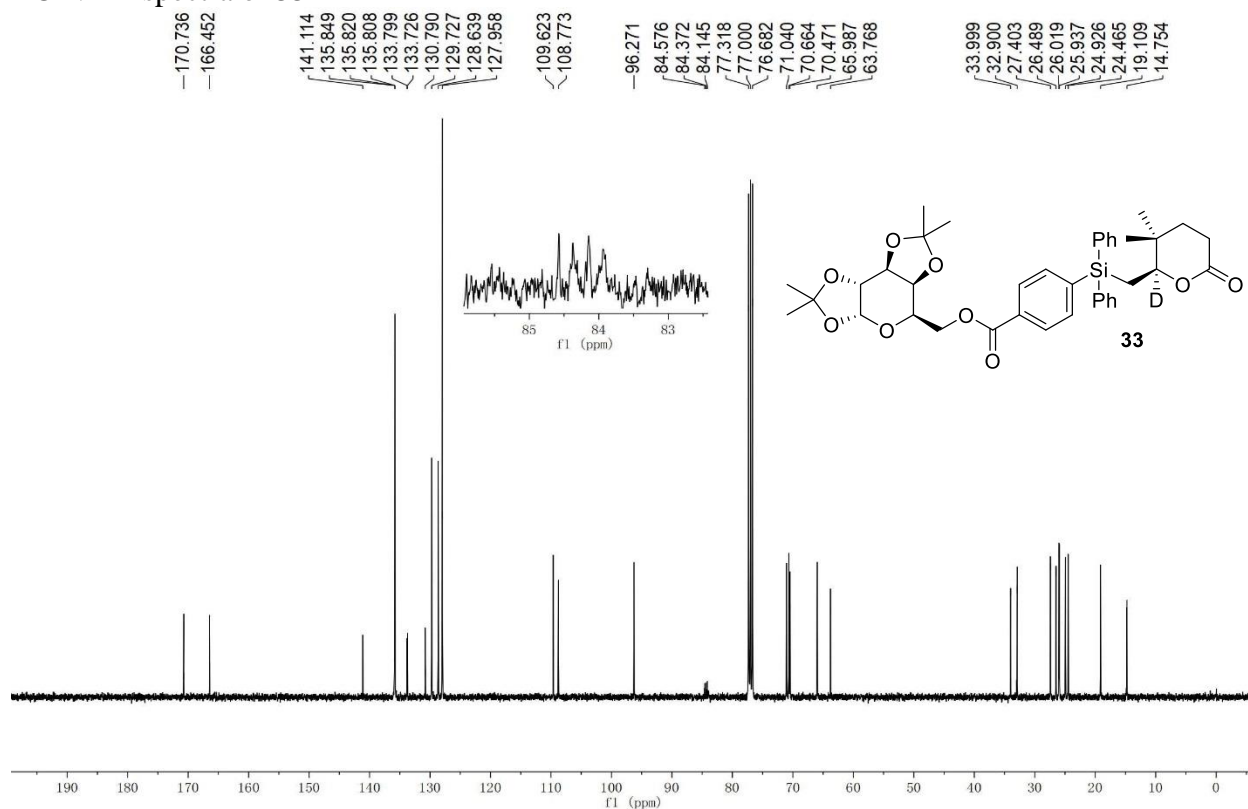

### HPLC spectra of racemic **33**

Data File : (36-racemic)RAM-3-88A-.lcd  
 Method File : AD-H-90-10-1-214.lcm  
 Date Processed : 7/17/2021 12:28:33 PM

#### <Chromatogram View>

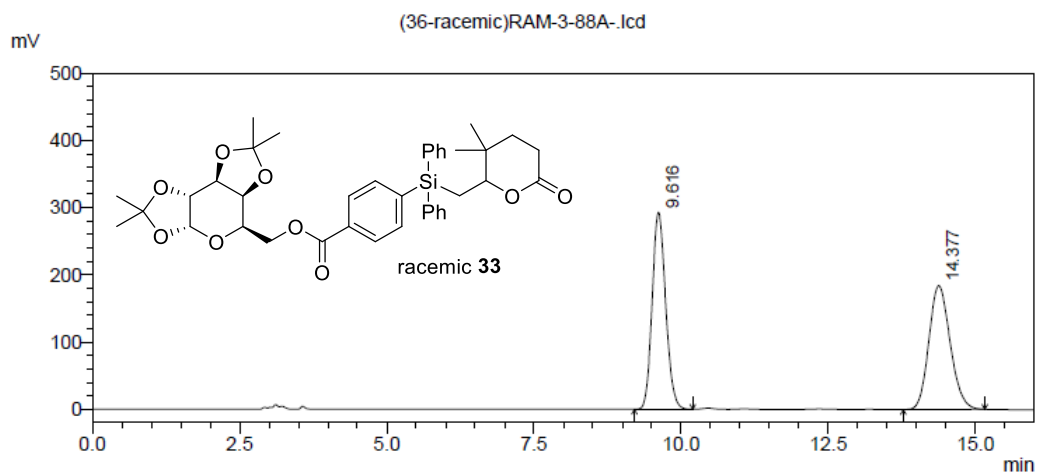

#### <Data Analysis>

| DetA 214nm |           |        |         |         |
|------------|-----------|--------|---------|---------|
| Pesk #     | Ret. Time | Height | Area    | Area%   |
| 1          | 9.616     | 292937 | 4675074 | 50.153  |
| 2          | 14.377    | 184230 | 4646485 | 49.847  |
| Total      |           | 477167 | 9321559 | 100.000 |

# HPLC spectra of 33

Data File : (36-chiral)RAM-3-112.lcd  
 Method File : AD-H-90-10-1-214.lcm  
 Date Processed : 10/23/2021 4:22:43 PM

<Chromatogram View>

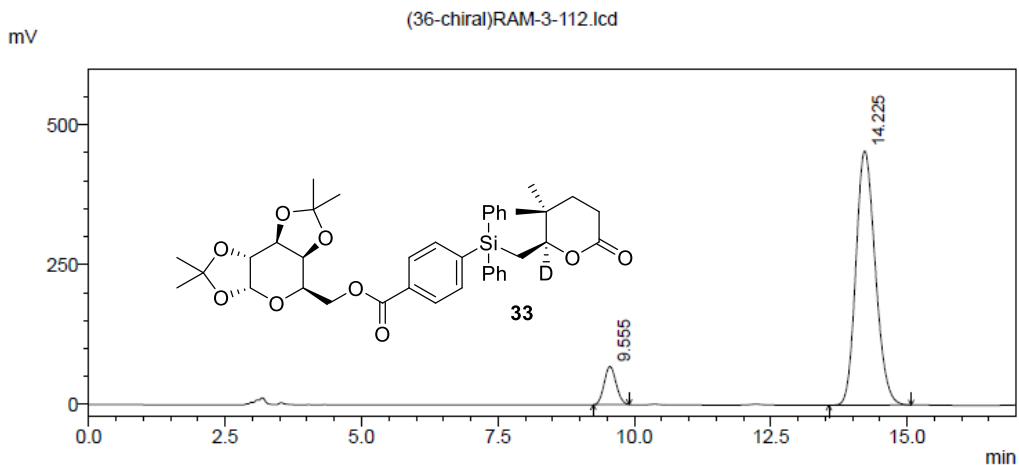

<Data Analysis>

| DetA 214nm |           |        |          |         |
|------------|-----------|--------|----------|---------|
| Pesk #     | Ret. Time | Height | Area     | Area%   |
| 1          | 9.555     | 68219  | 1041022  | 8.478   |
| 2          | 14.225    | 454573 | 11237639 | 91.522  |
| Total      |           | 522792 | 12278662 | 100.000 |

# <sup>1</sup>H NMR spectra of 34

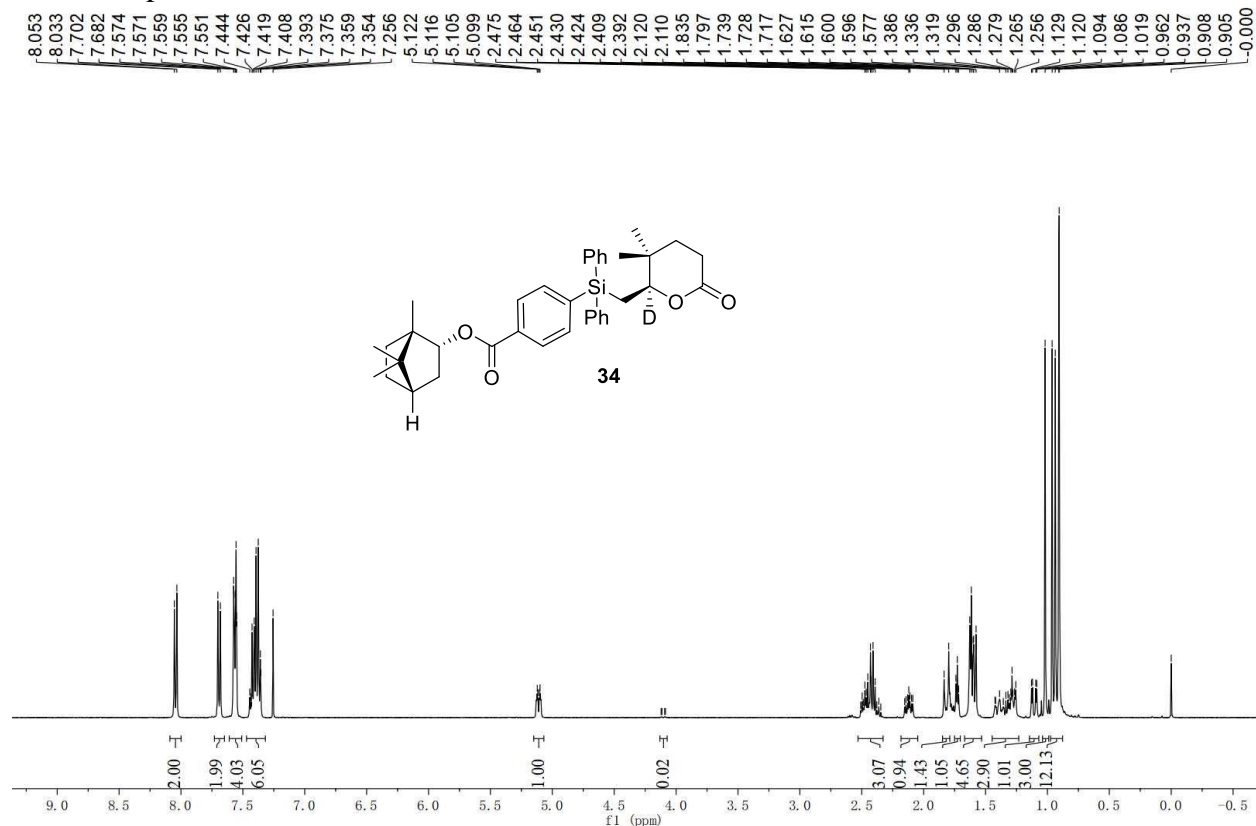

### <sup>13</sup>C NMR spectra of **34**

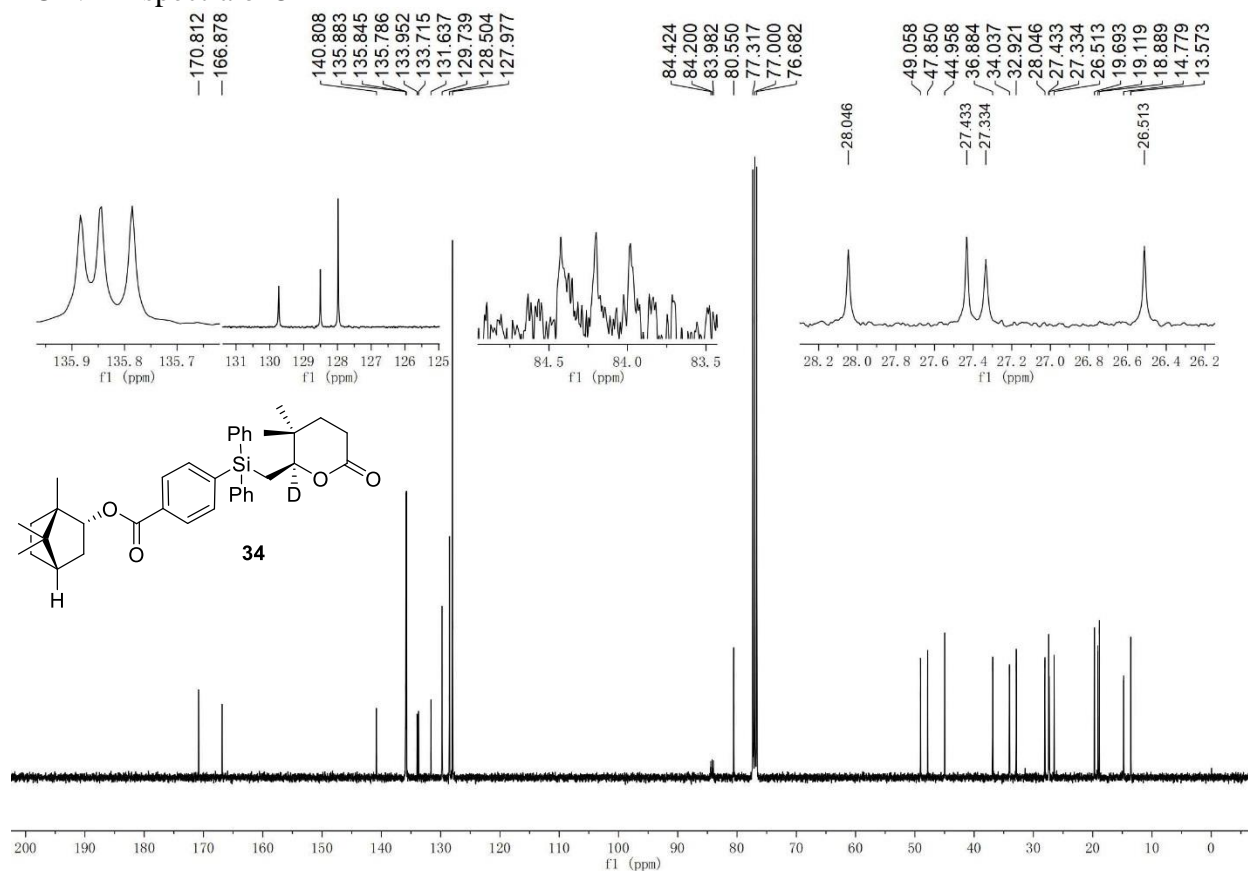

### HPLC spectra of racemic **34**

Data File : 37-RACEMIC-ram-3-137a-7.lcd  
 Method File : 3AD-H.98-1-214.lcm  
 Date Processed : 7/17/2021 12:31:42 PM

#### <Chromatogram View>

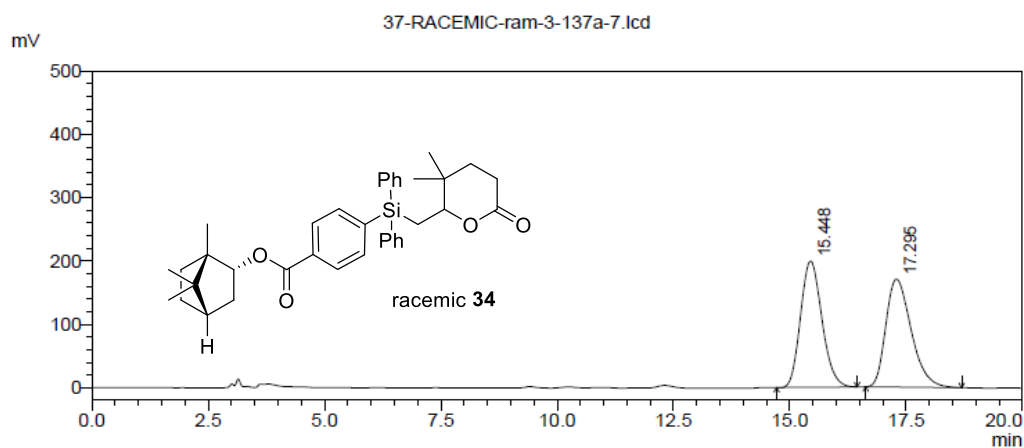

#### <Data Analysis>

| Pesk # | Ret. Time | Height | Area     | Area%   |
|--------|-----------|--------|----------|---------|
| 1      | 15.448    | 199395 | 6381038  | 49.670  |
| 2      | 17.295    | 170567 | 6465753  | 50.330  |
| Total  |           | 369962 | 12846791 | 100.000 |

# HPLC spectra of 34

Data File : 37CHIRAL-ram-3-242-6.lcd  
 Method File : 3AD-H-98-1-214.lcm  
 Date Processed : 7/17/2021 12:30:00 PM

## <Chromatogram View>

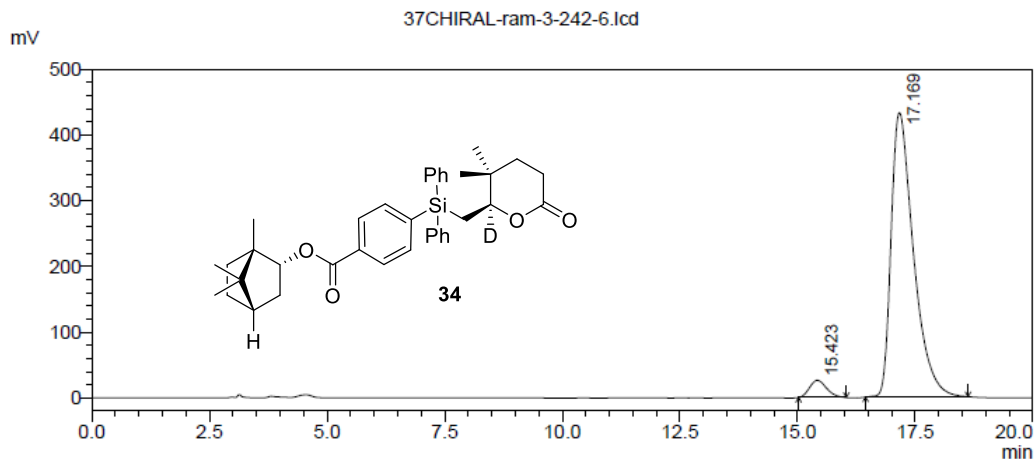

## <Data Analysis>

| DetA 214nm |           |        |          |         |
|------------|-----------|--------|----------|---------|
| Peak #     | Ret. Time | Height | Area     | Area%   |
| 1          | 15.423    | 26259  | 664673   | 4.433   |
| 2          | 17.169    | 432590 | 14328938 | 95.567  |
| Total      |           | 458849 | 14993610 | 100.000 |

## <sup>1</sup>H NMR spectra of 35

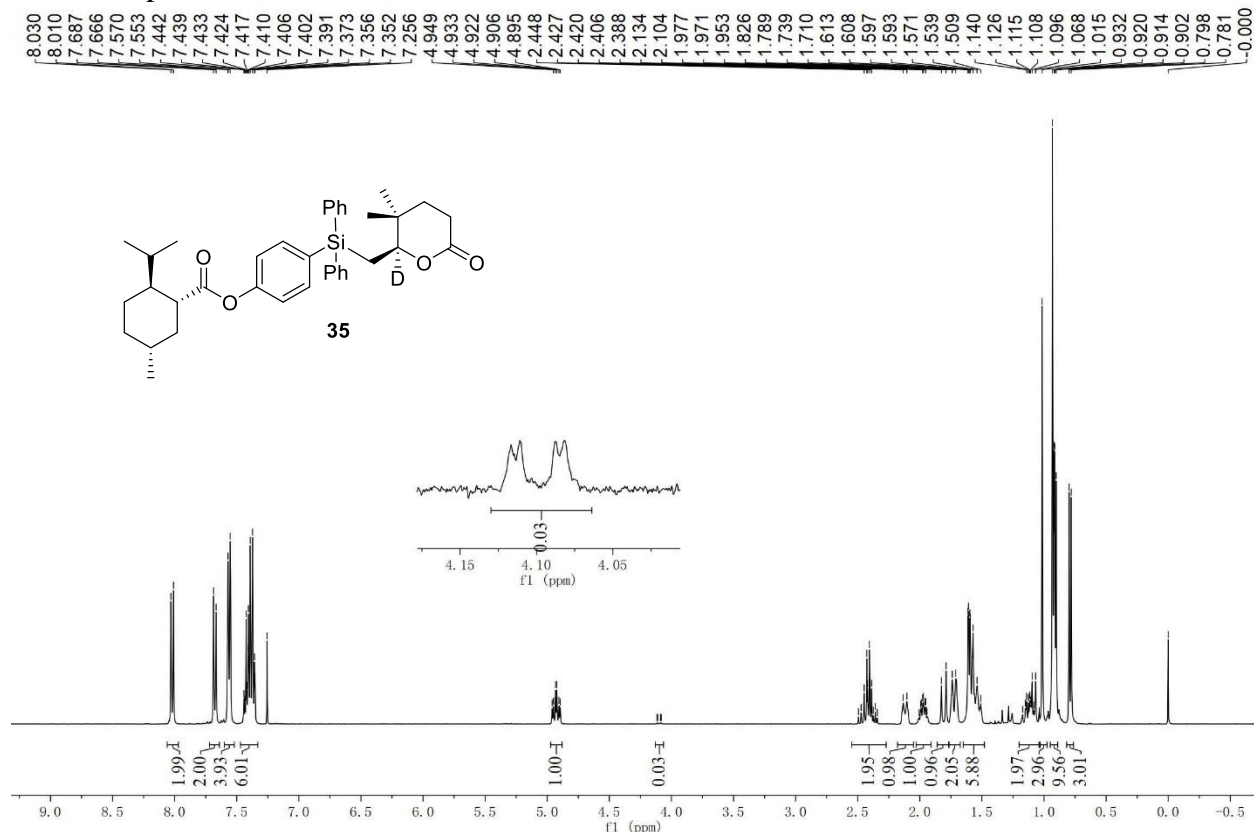

<sup>13</sup>C NMR spectra of **35**

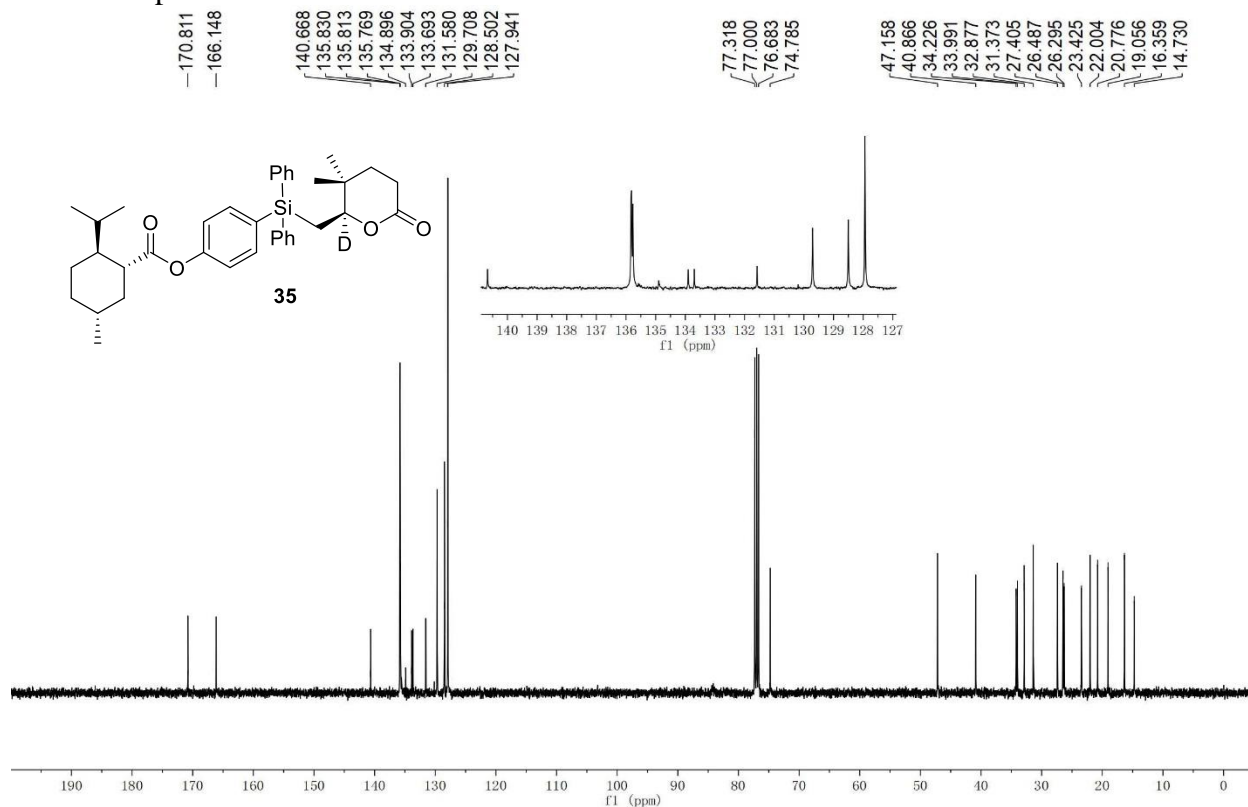

HPLC spectra of racemic **35**

Data File : (38-racemic)RAM-3-67A.lcd  
 Method File : AD-H-95+5-1-214.lcm  
 Date Processed : 7/17/2021 12:32:07 PM

<Chromatogram View>

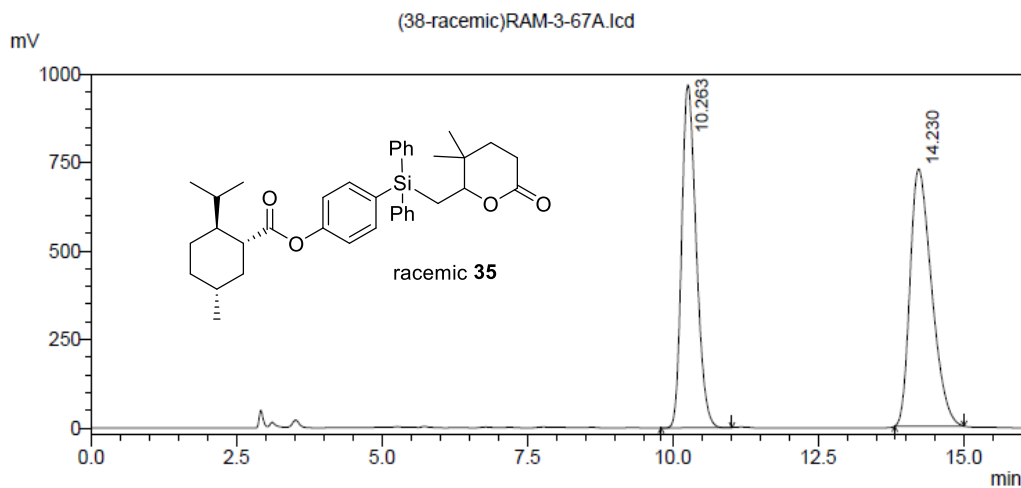

<Data Analysis>

| Peak # | Ret. Time | Height  | Area     | Area%   |
|--------|-----------|---------|----------|---------|
| 1      | 10.263    | 968436  | 16812862 | 47.192  |
| 2      | 14.230    | 726969  | 18813294 | 52.808  |
| Total  |           | 1695405 | 35626156 | 100.000 |

# HPLC spectra of 35

Data File : (38-chiral)RAM-3-67B.lcd  
 Method File : AD-H-95+5-1-214.lcm  
 Date Processed : 7/17/2021 12:32:22 PM

## <Chromatogram View>

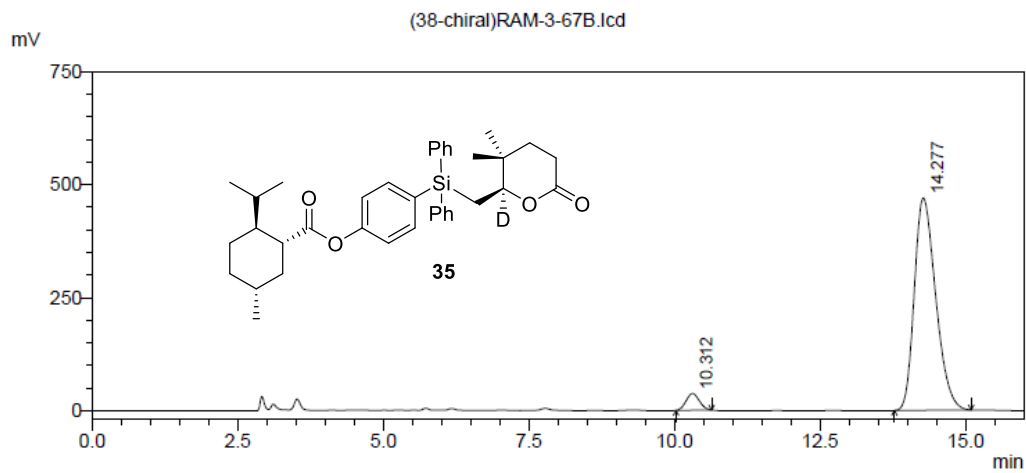

## <Data Analysis>

??A 214nm

| Pesk # | Ret. Time | Height | Area     | Area%   |
|--------|-----------|--------|----------|---------|
| 1      | 10.312    | 36934  | 580715   | 4.610   |
| 2      | 14.277    | 469504 | 12015950 | 95.390  |
| Total  |           | 506438 | 12596665 | 100.000 |



<sup>1</sup>H NMR spectra of **36**

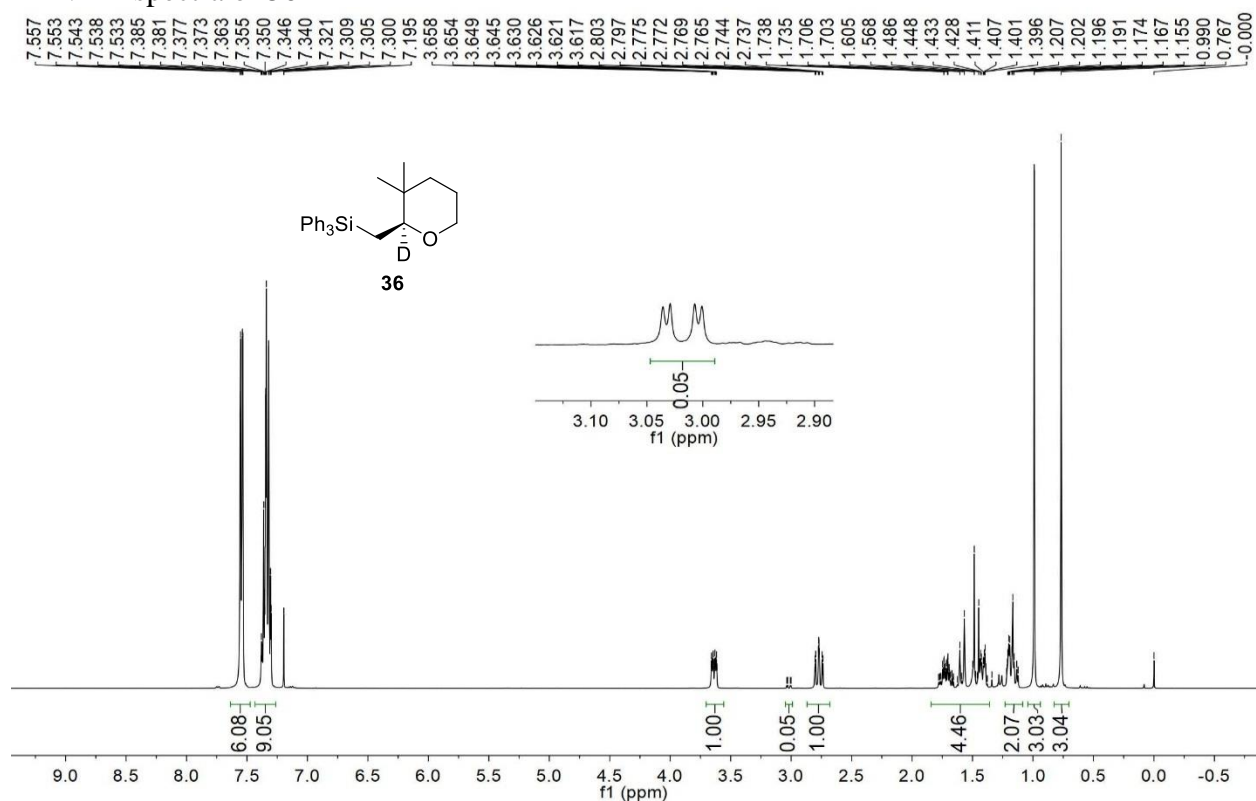

<sup>13</sup>C NMR spectra of **36**

sql-6-52c.1.fid

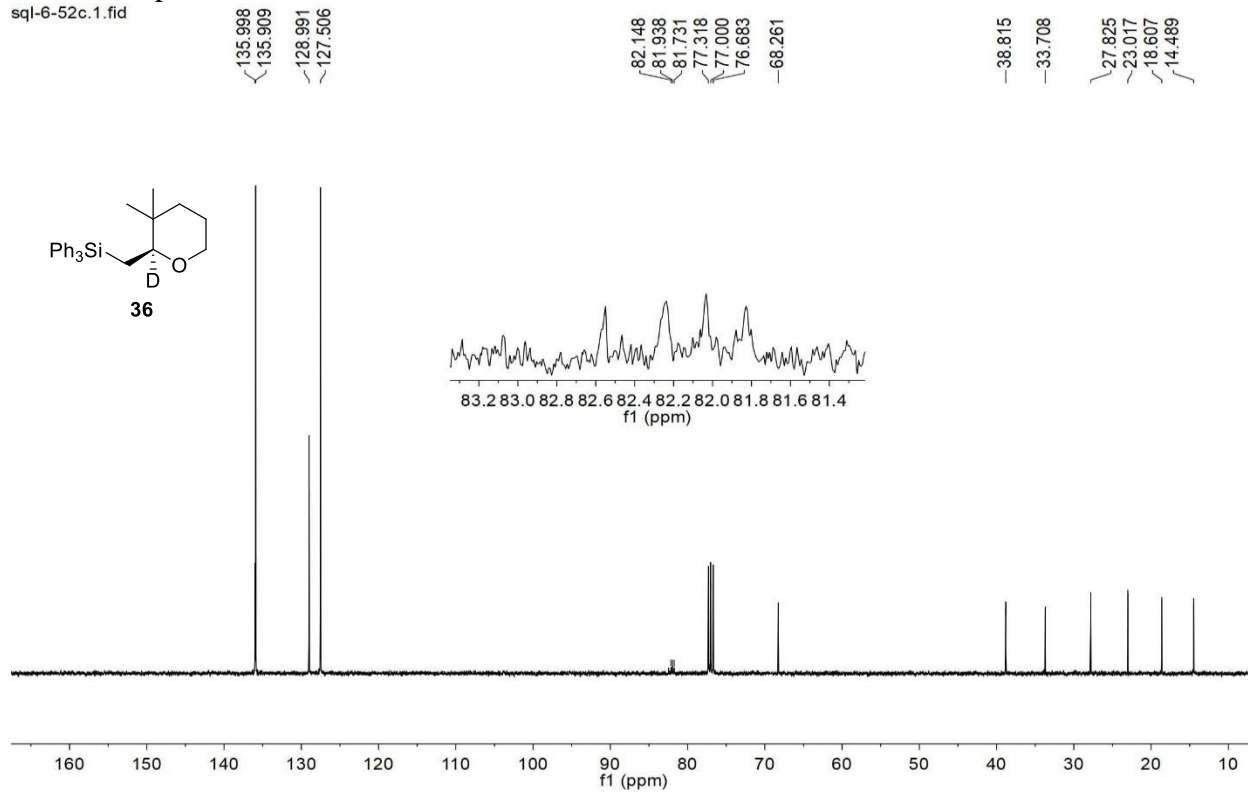

# HPLC spectra of racemic **36**

| SAMPLE INFORMATION |                          |                     |                     |
|--------------------|--------------------------|---------------------|---------------------|
| Sample Name:       | sql-5-134-ad-h-8-2       | Acquired By:        | System              |
| Sample Type:       | Unknown                  | Sample Set Name     |                     |
| Vial:              | 1:A,2                    | Acq. Method Set:    | test_1              |
| Injection #:       | 1                        | Processing Method   | Default             |
| Injection Volume:  | 2.00 ul                  | Channel Name:       | PDA Ch1 230nm@4.8nm |
| Run Time:          | 30.0 Minutes             | Proc. Chnl. Descr.: | PDA Ch1 230nm@4.8nm |
| Date Acquired:     | 8/27/2021 1:59:02 PM CST |                     |                     |
| Date Processed:    | 9/3/2021 3:52:04 PM CST  |                     |                     |

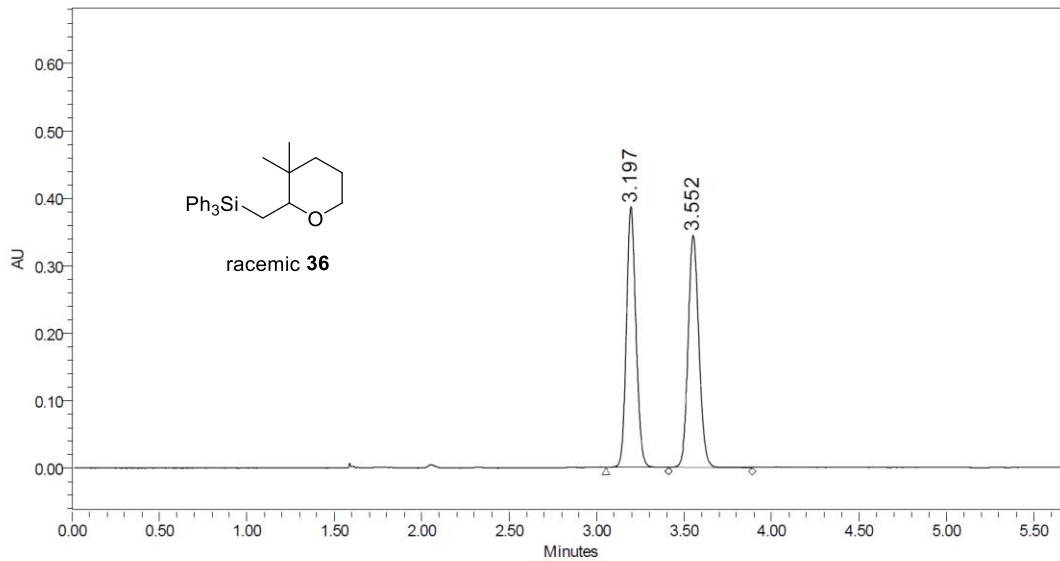

|   | RT    | Height | Width (sec) | Area    | % Area |
|---|-------|--------|-------------|---------|--------|
| 1 | 3.197 | 386475 | 21.500      | 1464289 | 49.68  |
| 2 | 3.552 | 344729 | 28.650      | 1482979 | 50.32  |

# HPLC spectra of **36**

| SAMPLE INFORMATION |                          |                     |                     |
|--------------------|--------------------------|---------------------|---------------------|
| Sample Name:       | sql-6-52                 | Acquired By:        | System              |
| Sample Type:       | Unknown                  | Sample Set Name     |                     |
| Vial:              | 1:A,3                    | Acq. Method Set:    | test_1              |
| Injection #:       | 1                        | Processing Method   | Default             |
| Injection Volume:  | 2.00 ul                  | Channel Name:       | PDA Ch1 230nm@4.8nm |
| Run Time:          | 30.0 Minutes             | Proc. Chnl. Descr.: | PDA Ch1 230nm@4.8nm |
| Date Acquired:     | 8/27/2021 2:06:02 PM CST |                     |                     |
| Date Processed:    | 9/3/2021 3:52:23 PM CST  |                     |                     |

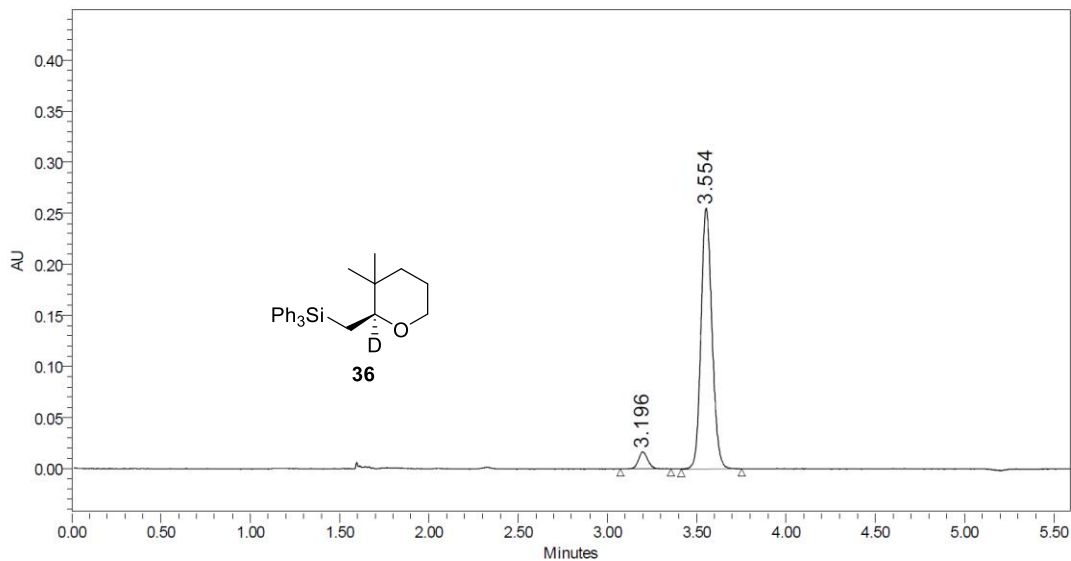

|   | RT    | Height | Width (sec) | Area    | % Area |
|---|-------|--------|-------------|---------|--------|
| 1 | 3.196 | 16609  | 17.000      | 61242   | 5.28   |
| 2 | 3.554 | 255563 | 20.350      | 1099417 | 94.72  |



## HPLC spectra of racemic **37**

Data File : 55-RACEMIC-SQL--6-54-1.lcd  
 Method File : 4OD-H-95-1-214-20min.lcm  
 Date Processed : 9/2/2021 12:15:20 AM

### <Chromatogram View>

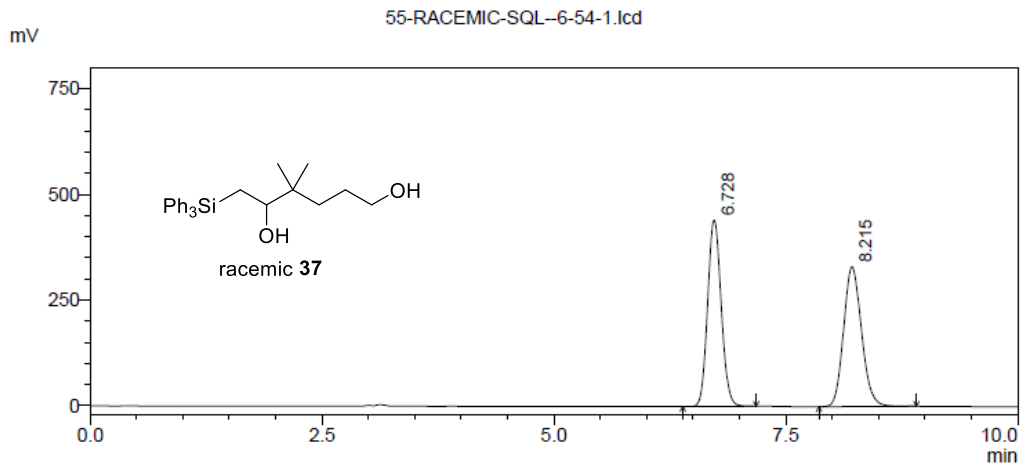

### <Data Analysis>

Detector A 214nm

| Pesk # | Ret. Time | Height | Area    | Area%   |
|--------|-----------|--------|---------|---------|
| 1      | 6.728     | 440851 | 4492834 | 50.142  |
| 2      | 8.215     | 330837 | 4467467 | 49.858  |
| Total  |           | 771688 | 8960301 | 100.000 |

## HPLC spectra of **37**

Data File : 55-CHIRAL-SQL--6-67.lcd  
 Method File : 4OD-H-95-1-214-20min.lcm  
 Date Processed : 9/2/2021 12:15:50 AM

### <Chromatogram View>

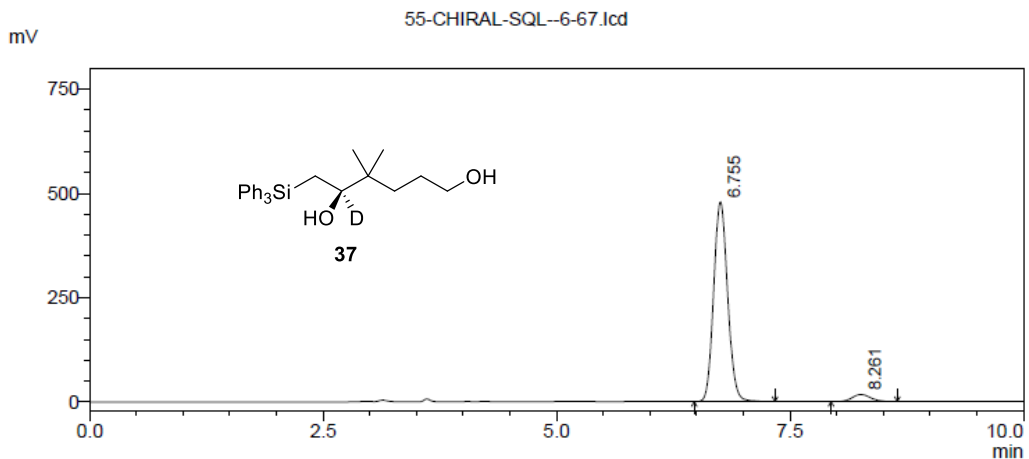

### <Data Analysis>

Detector A 214nm

| Pesk # | Ret. Time | Height | Area    | Area%   |
|--------|-----------|--------|---------|---------|
| 1      | 6.755     | 478180 | 4986603 | 95.552  |
| 2      | 8.261     | 16978  | 232107  | 4.448   |
| Total  |           | 495159 | 5218710 | 100.000 |

# <sup>1</sup>H NMR spectra of **38**

sql-6-70.10.fid

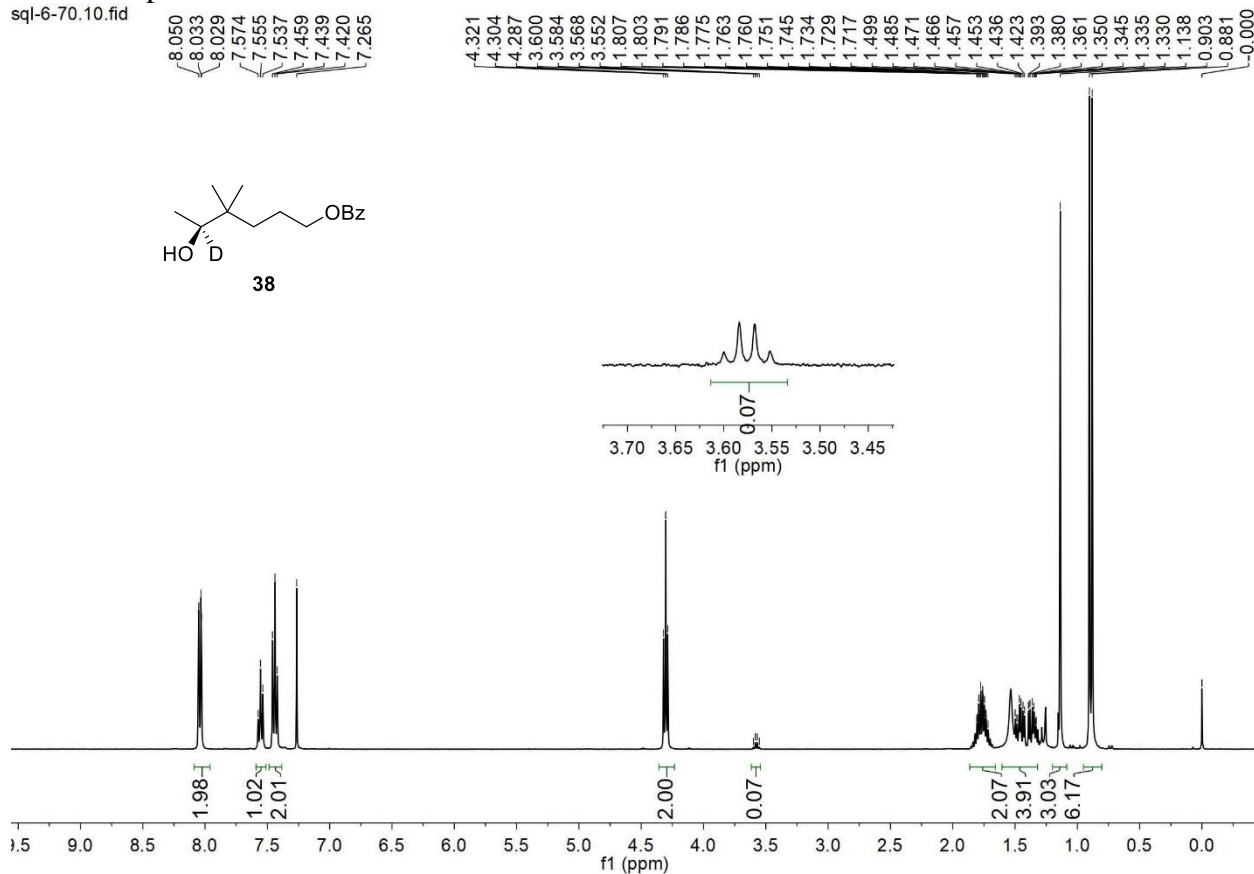

# <sup>13</sup>C NMR spectra of **38**

sql-6-70-1C.1.fid

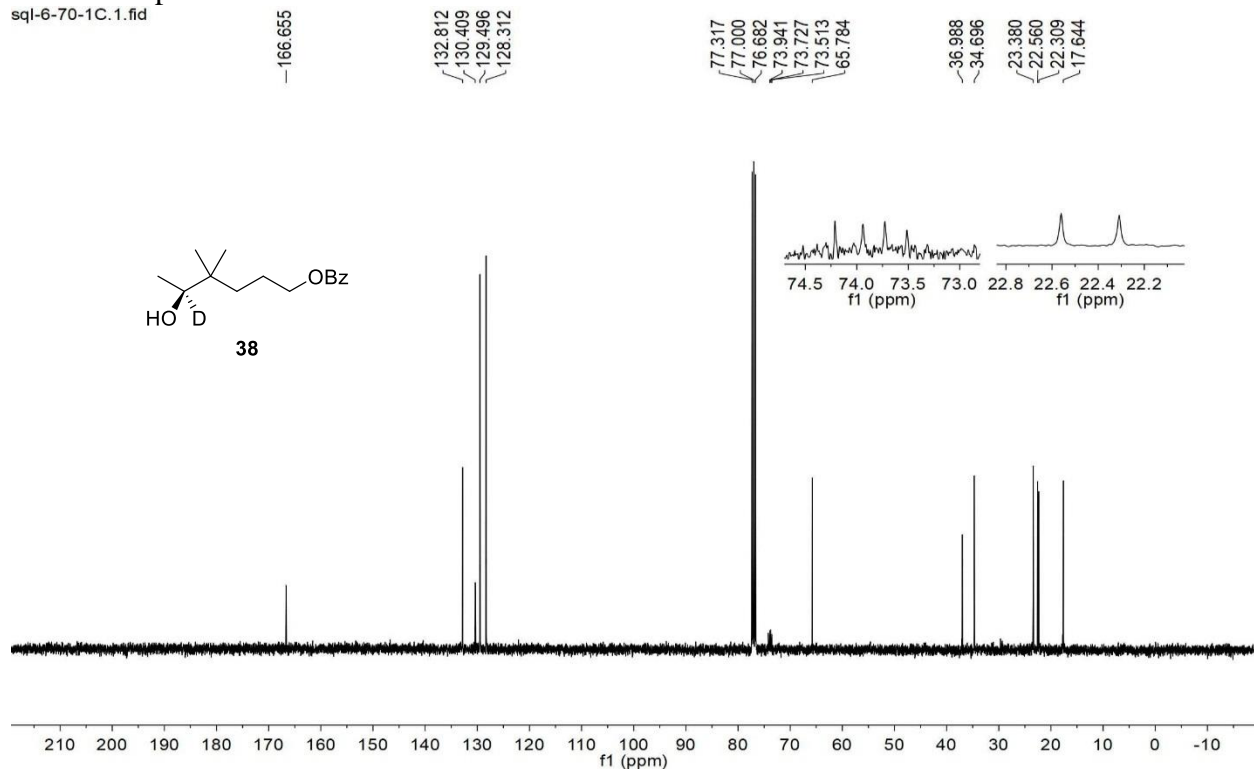

## HPLC spectra of racemic **38**

Data File : 57-RACEMIC-SQL-6-61-5.lcd  
 Method File : 1QJ-H-99.8-1-214-55min.lcm  
 Date Processed : 9/2/2021 12:18:21 AM

### <Chromatogram View>

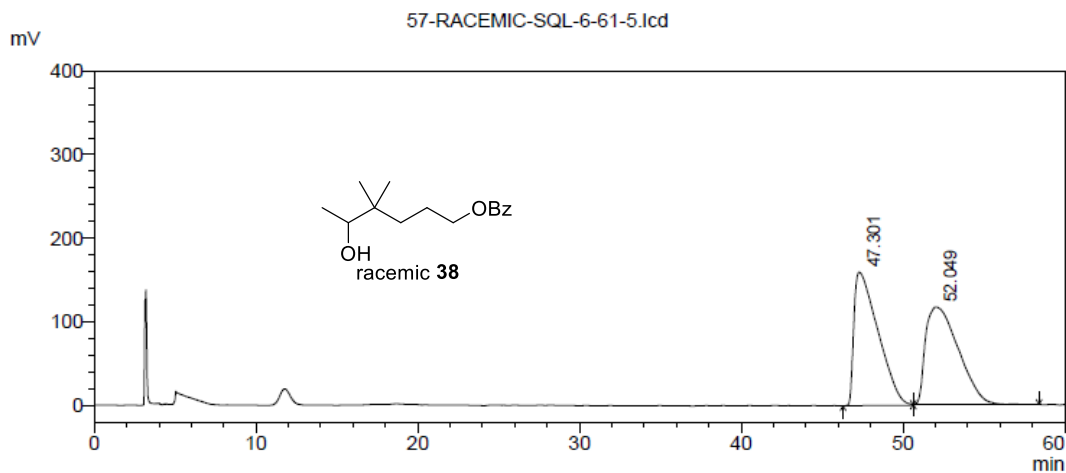

### <Data Analysis>

| Detector A 214nm |           |        |          |         |
|------------------|-----------|--------|----------|---------|
| Pesk #           | Ret. Time | Height | Area     | Area%   |
| 1                | 47.301    | 159752 | 16514396 | 50.168  |
| 2                | 52.049    | 116421 | 16403545 | 49.832  |
| Total            |           | 276172 | 32917941 | 100.000 |

## HPLC spectra of **38**

Data File : SQL--6-70-1.lcd  
 Method File : 1QJ-H-99.8-1-214-55min.lcm  
 Date Processed : 9/2/2021 12:17:14 AM

### <Chromatogram View>

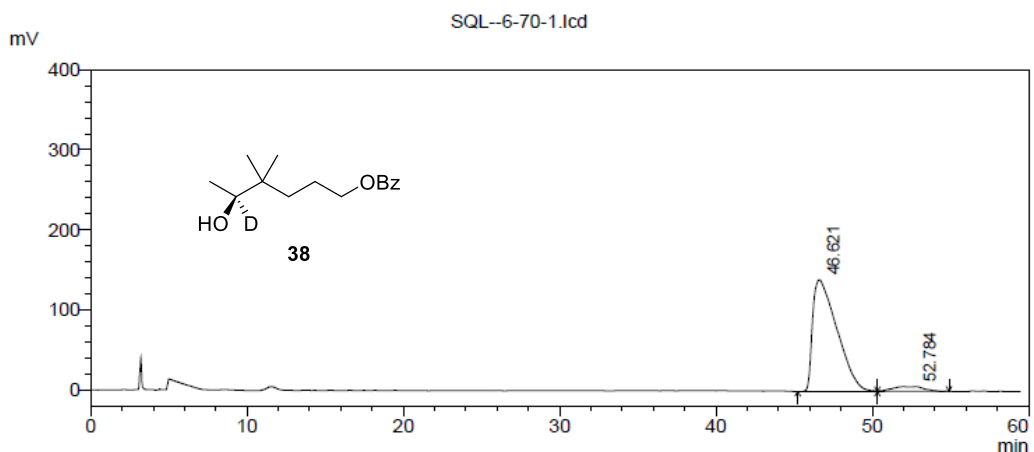

### <Data Analysis>

| Detector A 214nm |           |        |          |         |
|------------------|-----------|--------|----------|---------|
| Pesk #           | Ret. Time | Height | Area     | Area%   |
| 1                | 46.621    | 139739 | 15112400 | 95.023  |
| 2                | 52.784    | 5893   | 791596   | 4.977   |
| Total            |           | 145632 | 15903996 | 100.000 |
